# Supplementary material for: Rh(iii)-catalyzed aldehydic and aryl C–H alkylation with cyclopropanols via C–H/C–C bond activation
Source: Royal Society of Chemistry journal article supplement (doi:10.1039/d4cc03797a), 2024-01-01

# **Rh(III) Catalyzed Aldehydic and Aryl C-H Alkylation with Cyclopropanols *via* C-H/C-C Bond Activation**

**Om Prakash Dash, Divya Garg and Chandra M. R. Volla\***

Department of Chemistry, Indian Institute of Technology Bombay

Powai, Mumbai-400076, India.

E-mail: [chandra.volla@chem.iitb.ac.in](mailto:chandra.volla@chem.iitb.ac.in)

## **Supporting Information**

### **Table of contents**

|           |                                                                      |                  |
|-----------|----------------------------------------------------------------------|------------------|
| <b>1</b>  | <b>General considerations and reagent information</b>                | <b>S2</b>        |
| <b>2</b>  | <b>General procedures for the synthesis of starting materials</b>    | <b>S(2-3)</b>    |
| <b>3</b>  | <b>Procedure and Optimization of the reaction protocols</b>          | <b>S(3-6)</b>    |
| <b>4</b>  | <b>Mechanistic studies</b>                                           | <b>S(6-10)</b>   |
| <b>5</b>  | <b>Proposed mechanism</b>                                            | <b>S(11-13)</b>  |
| <b>6</b>  | <b>Scale up and functionalizations</b>                               | <b>S(13-20)</b>  |
| <b>7</b>  | <b>References</b>                                                    | <b>S21</b>       |
| <b>8</b>  | <b>X-ray Crystallography data for the compounds</b>                  | <b>S(21-26)</b>  |
| <b>9</b>  | <b>Spectroscopy data for new starting materials</b>                  | <b>S(26-27)</b>  |
| <b>10</b> | <b>Spectroscopic data of final products</b>                          | <b>S(27-49)</b>  |
| <b>11</b> | <b><sup>1</sup>H and <sup>13</sup>C NMR spectra of the compounds</b> | <b>S(49-111)</b> |

## 1. General considerations.

All reactions were carried out under air in screw cap reaction tubes. Unless otherwise noted, all the chemicals were purchased from commercial suppliers and used as received. Reactions were monitored using thin-layer chromatography (SiO<sub>2</sub>). A gradient elution using petroleum ether and ethyl acetate was performed based on Merck aluminum TLC sheets (silica gel 60F<sub>254</sub>). TLC plates were visualized with UV light (254 nm) or KMnO<sub>4</sub> stain. For column chromatography, silica gel (100–200 mesh) from Finar Co. was used. All isolated compounds are characterized by <sup>1</sup>H NMR, <sup>13</sup>C NMR spectroscopy. In addition, all the compounds are further characterized by HRMS. HRMS were recorded with Bruker MaXis impact mass spectrometer using ESI-TOF techniques. Copies of <sup>1</sup>H NMR and <sup>13</sup>C NMR can be found in the supporting information. Nuclear magnetic resonance spectra were recorded either on a Bruker 500 or a 400 MHz instrument. All <sup>1</sup>H NMR experiments are reported in units, parts per million (ppm), and was measured relative to the signals for residual chloroform (7.26 ppm) in the deuterated solvent, unless otherwise stated. All <sup>13</sup>C NMR spectra was reported in ppm relative to deuteriochloroform (77.16 ppm) unless otherwise stated, and all was obtained with 1 H decoupling.

## 2. (a) General procedure for the synthesis of starting materials.<sup>1</sup>

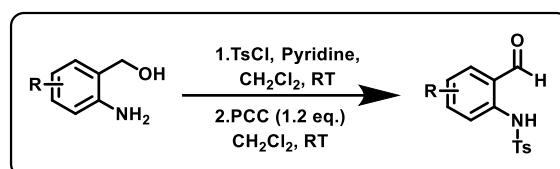

A dry and nitrogen-flushed 250-mL Schlenk flask, equipped with a magnetic stirring bar and a septum, was charged with a solution of 2-aminobenzyl alcohol (1.23 g, 10 mmol) in CH<sub>2</sub>Cl<sub>2</sub> (100 mL). TsCl (2.09 g, 1.1 equiv) and pyridine (0.1 mL) was added, and the reaction mixture was stirred for 12 h at room temperature. Thereafter, the solvent was removed by evaporation in vacuum. Without purification, the crude product was dissolved in dichloromethane (30 mL) and then PCC (2.6 g, 1.2 equiv) was added. The reaction mixture was stirred for 4 h at room temperature and then filtered through Celite followed by washing with CH<sub>2</sub>Cl<sub>2</sub>. Thereafter, the solvent was removed by evaporation in vacuum. Purification by column chromatography (ethyl acetate/hexanes: 1/2) furnished 2-tosylaminobenzaldehyde.

## (b) General Procedure for the Preparation of Cyclopropanol.<sup>2</sup>

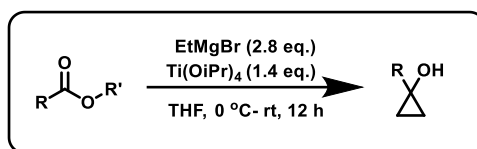

To a stirred solution of ester (5.0 mmol) in THF (10 mL),  $\text{Ti}(\text{OiPr})_4$  (7 mmol, 1.4 equiv, 2 mL) was added under  $\text{N}_2$  atmosphere, which was treated with alkylmagnesium bromide (2.8 equiv) dropwise via syringe at  $0\text{ }^\circ\text{C}$ . The black solution was allowed to warm to room temperature and stirred for 12 h. After completion, the reaction mixture was cooled to  $0\text{ }^\circ\text{C}$  and quenched with slow addition of sulfuric acid solution (2.0 M, 20 mL) and stirred until all the solid dissolved to give a clear two-phase liquid. The liquid was separated and the aqueous solution was extracted with diethyl ether ( $3 \times 30\text{ mL}$ ). The organic layer was collected, washed with brine, and dried over anhydrous  $\text{Na}_2\text{SO}_4$ . The organic solution was filtered and concentrated in vacuo. The residue was purified by flash column chromatography on silica gel (Hexane/EtOAc, 5:1) to provide the cyclopropanol product.

## (c) General procedure for the synthesis of pyridinyl arylamines.<sup>3</sup>

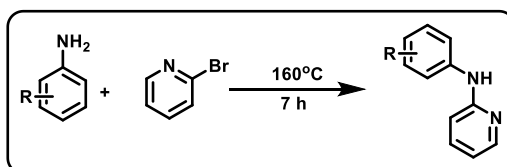

A 25 mL Schlenk tube with a magnetic stir bar was charged with aniline (1.4 g, 15 mmol), 2-bromopyridine (2.4 g, 15 mmol). The reaction mixture was stirred at  $160\text{ }^\circ\text{C}$  (oil bath) for 7 h under an atmosphere of argon. Upon completion, saturated  $\text{NaHCO}_3$  was added, and the mixture was extracted with EtOAc ( $3 \times 15\text{ mL}$ ). The combined organic phase was washed with brine and dried over  $\text{Na}_2\text{SO}_4$ . The solid was filtered off and the filtrate was evaporated in vacuum. The crude product was purified by flash column chromatography (n-hexanes/EtOAc) to give N-phenylpyridin-2-amine.

### 3. Procedure and Optimization of the reaction protocols

#### (a) General procedure for the synthesis of 1,4-diketones.

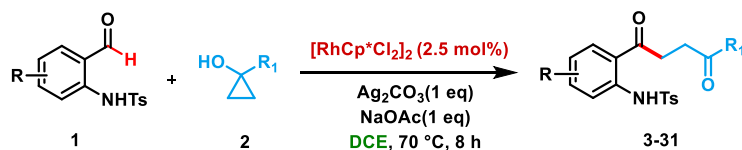

In an oven-dried reaction tube, charged with magnetic stir-bar,  $[\text{RhCp}^*\text{Cl}_2]_2$  (2.5 mol%), and  $\text{Ag}_2\text{CO}_3$  (0.2 mmol),  $\text{NaOAc}$  (0.2 mmol), 2-tosylaminobenzaldehyde **1** (0.2 mmol, 1 eq.) and cyclopropanol **2** (0.3 mmol, 1.5 eq.) were added followed by addition of 2 ml of 1,2-dichloroethane via syringe. The reaction mixture was allowed to stir at 70 °C for 8 h. Then, the mixture was cooled and diluted with  $\text{CH}_2\text{Cl}_2$  (10 mL). The mixture was filtered through a Celite pad and washed with  $\text{CH}_2\text{Cl}_2$  ( $3 \times 10$  mL). The filtrate was concentrated under reduced pressure. The residue was purified by silica gel column chromatography using hexane/ethyl acetate as eluent to afford the desired pure product **3** to **31**.

#### Optimization table

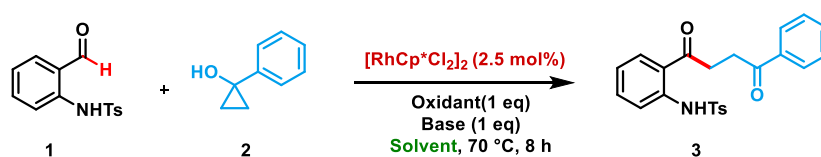

| Entry    | Solvent    | Base                      | Oxidant                                            | Yield (3)(%) |
|----------|------------|---------------------------|----------------------------------------------------|--------------|
| 1        | TFE        | NaOAc                     | $\text{Ag}_2\text{CO}_3$                           | Trace        |
| 2        | MeOH       | NaOAc                     | $\text{Ag}_2\text{CO}_3$                           | N.R          |
| 3        | MeCN       | NaOAc                     | $\text{Ag}_2\text{CO}_3$                           | Trace        |
| 4        | Toluene    | NaOAc                     | $\text{Ag}_2\text{CO}_3$                           | 42           |
| 5        | THF        | NaOAc                     | $\text{Ag}_2\text{CO}_3$                           | 75           |
| <b>6</b> | <b>DCE</b> | <b>NaOAc</b>              | <b><math>\text{Ag}_2\text{CO}_3</math></b>         | <b>78</b>    |
| 7        | DCE        | NaOAc                     | $\text{Cu}(\text{OAc})_2 \cdot \text{H}_2\text{O}$ | 51           |
| 8        | DCE        | NaOAc                     | $\text{Ag}_2\text{O}$                              | 58           |
| 9        | DCE        | $\text{Na}_2\text{CO}_3$  | $\text{Ag}_2\text{CO}_3$                           | 46           |
| 10       | DCE        | $\text{Na}_2\text{HPO}_4$ | $\text{Ag}_2\text{CO}_3$                           | 54           |
| 11       | DCE        | $\text{Cs}_2\text{CO}_3$  | $\text{Ag}_2\text{CO}_3$                           | Trace        |
| 12       | DCE        | $\text{CsOAc}$            | $\text{Ag}_2\text{CO}_3$                           | Trace        |

|                 |     |                                |                                 |       |
|-----------------|-----|--------------------------------|---------------------------------|-------|
| 13              | DCE | K <sub>2</sub> CO <sub>3</sub> | Ag <sub>2</sub> CO <sub>3</sub> | 42    |
| 14              | DCE | NaOAc                          | -                               | Trace |
| 15 <sup>b</sup> | DCE | NaOAc                          | Ag <sub>2</sub> CO <sub>3</sub> | N.R   |
| 16 <sup>c</sup> | DCE | NaOAc                          | Ag <sub>2</sub> CO <sub>3</sub> | N.R   |
| 17 <sup>c</sup> | TFE | NaOAc                          | Ag <sub>2</sub> CO <sub>3</sub> | N.R   |
| 18 <sup>d</sup> | DCE | NaOAc                          | Ag <sub>2</sub> CO <sub>3</sub> | 63    |
| 19 <sup>e</sup> | DCE | NaOAc                          | Ag <sub>2</sub> CO <sub>3</sub> | 57    |

**reaction condition:** <sup>a</sup> [RhCp\*Cl<sub>2</sub>]<sub>2</sub> (2.5 mol%), 1a (1 equiv), 2a (1.5 equiv), Base (1 equiv.), oxidant (1 equiv.). yield are isolated yield at 70 °C, <sup>b</sup> without [RhCp\*Cl<sub>2</sub>]<sub>2</sub> <sup>c</sup> With [Cp\*CoCOI<sub>2</sub>] (10 mol%) and AgSbF<sub>6</sub> (20 mol%). <sup>d</sup> reaction at 90 °C. <sup>e</sup>Reaction at 110 °C.

### (b) General procedure for the C-H alkylation of anilines.

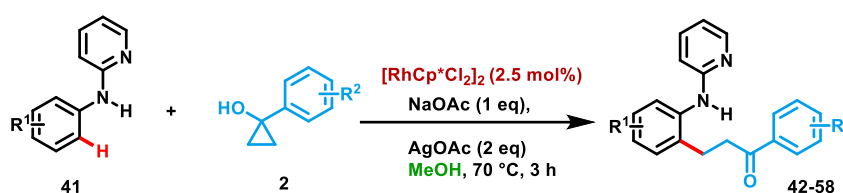

In an oven-dried reaction tube, charged with magnetic stir-bar, [RhCp\*Cl<sub>2</sub>]<sub>2</sub> (2.5 mol%), AgOAc (2 eq.), NaOAc (1 eq.), N-aryl aminopyridine **41** (0.2 mmol, 1 eq.) and cyclopropanol **2** (0.3 mmol, 2 eq.) were added followed by addition of 2 ml of MeOH via syringe. The reaction mixture was allowed to stir at room temperature for 3 h. On the completion of the reaction, the mixture was cooled and diluted with CH<sub>2</sub>Cl<sub>2</sub> (10 mL). The mixture was filtered through a Celite pad and washed with CH<sub>2</sub>Cl<sub>2</sub> (3 × 10 mL). The filtrate was concentrated under reduced pressure. The residue was purified by silica gel column chromatography using hexane/ethyl acetate as eluent to afford the desired pure product **42-58**.

### Optimization of the reaction

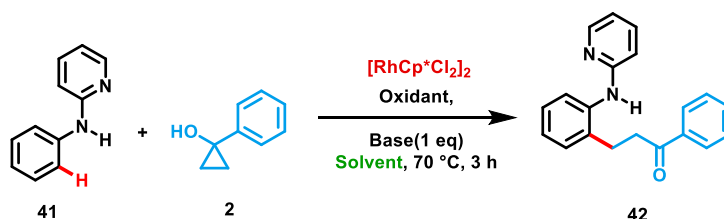

| Entry | Solvent | Base | Oxidant | %Yield (42) |
|-------|---------|------|---------|-------------|
|-------|---------|------|---------|-------------|

|                 |             |                                 |                                        |           |
|-----------------|-------------|---------------------------------|----------------------------------------|-----------|
| 1               | THF         | NaOAc                           | Cu(OAc) <sub>2</sub> .H <sub>2</sub> O | Trace     |
| 2               | DCE         | NaOAc                           | Cu(OAc) <sub>2</sub> .H <sub>2</sub> O | 66        |
| 3               | MeCN        | NaOAc                           | Cu(OAc) <sub>2</sub> .H <sub>2</sub> O | 24        |
| 4               | DMSO        | NaOAc                           | Cu(OAc) <sub>2</sub> .H <sub>2</sub> O | N.R       |
| 5               | TFE         | NaOAc                           | Cu(OAc) <sub>2</sub> .H <sub>2</sub> O | Trace     |
| 6               | MeOH        | NaOAc                           | Cu(OAc) <sub>2</sub> .H <sub>2</sub> O | 68        |
| 7               | MeOH        | NaOAc                           | Ag <sub>2</sub> CO <sub>3</sub>        | 30        |
| 8               | MeOH        | NaOAc                           | Ag <sub>2</sub> O                      | Trace     |
| <b>9</b>        | <b>MeOH</b> | <b>NaOAc</b>                    | <b>AgOAc</b>                           | <b>90</b> |
| 10              | MeOH        | Cs <sub>2</sub> CO <sub>3</sub> | AgOAc                                  | Trace     |
| 11              | MeOH        | CsOAc                           | AgOAc                                  | 25        |
| 12              | MeOH        | K <sub>2</sub> CO <sub>3</sub>  | AgOAc                                  | N.R       |
| 13              | MeOH        | NaOAc                           | -                                      | Trace     |
| 14 <sup>b</sup> | MeOH        | NaOAc                           | AgOAc                                  | N.R       |

**reaction condition:** <sup>a</sup> [RhCp\*Cl<sub>2</sub>]<sub>2</sub> (2.5 mol%), **41** (1 equiv), **2** (2.0 equiv), Base (1 equiv.), oxidant (2 equiv.). yields are isolated yield at 70°C, <sup>b</sup> without [RhCp\*Cl<sub>2</sub>]<sub>2</sub>.

## 4. Mechanistic studies

### (a) Deuterium exchange experiment

In an oven-dried reaction tube, charged with magnetic stir-bar, [RhCp\*Cl<sub>2</sub>]<sub>2</sub> (2.5 mol%), AgOAc (2 eq.), NaOAc (1 eq.), N-aryl aminopyridine **1** (34 mg, 0.2 mmol) were added followed by addition of MeOH/D<sub>2</sub>O (1.6/0.4 ml), via syringe. The reaction mixture was allowed to stir at room temperature for 2 h. Then, the mixture was cooled and diluted with CH<sub>2</sub>Cl<sub>2</sub> (10 mL). The mixture was filtered through a Celite pad and washed with CH<sub>2</sub>Cl<sub>2</sub> (3 × 10 mL). The filtrate was concentrated under reduced pressure. The residue was purified by silica gel column chromatography using hexane/ethyl acetate as eluent to afford recovered substrate **1a** with incorporation of deuterium.

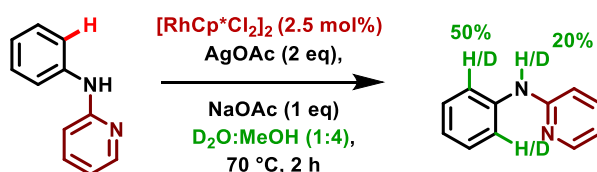

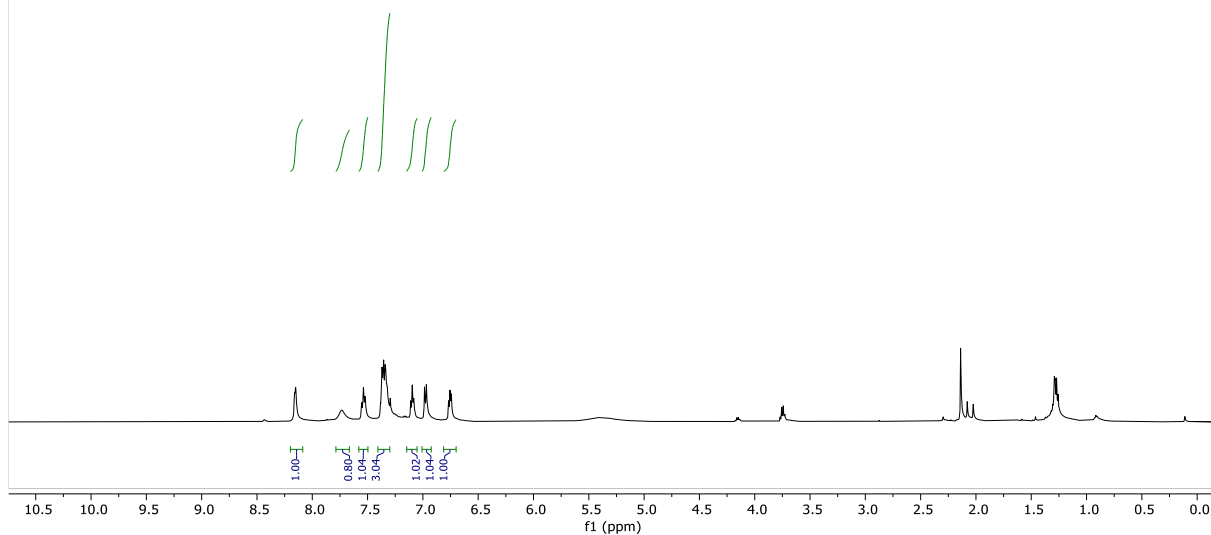

## Deuterium exchange experiment with coupling partner

In an oven-dried reaction tube, charged with magnetic stir-bar,  $[\text{RhCp}^*\text{Cl}_2]_2$  (2.5 mol%), AgOAc (2 eq.), NaOAc (1 eq.), N-aryl aminopyridine **41** (1 eq.) and cyclopropanol **2** (2 eq.) were added followed by addition of MeOH/D<sub>2</sub>O (1.6/0.4 ml), via syringe. The reaction mixture was allowed to stir at 70 °C for 2 h. Then, the mixture was cooled and diluted with CH<sub>2</sub>Cl<sub>2</sub> (10 mL). The mixture was filtered through a Celite pad and washed with CH<sub>2</sub>Cl<sub>2</sub> (3 × 10 mL). The filtrate was concentrated under reduced pressure. The residue was purified by silica gel column chromatography using hexane/ethyl acetate as eluent to afford product **42** with incorporation of deuterium.

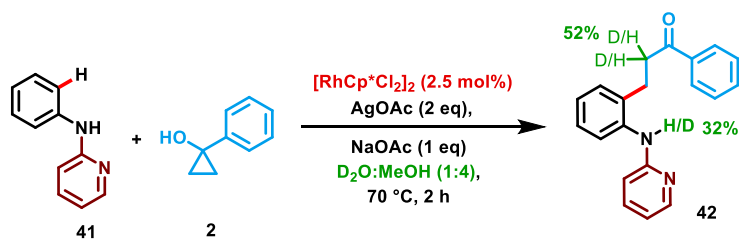

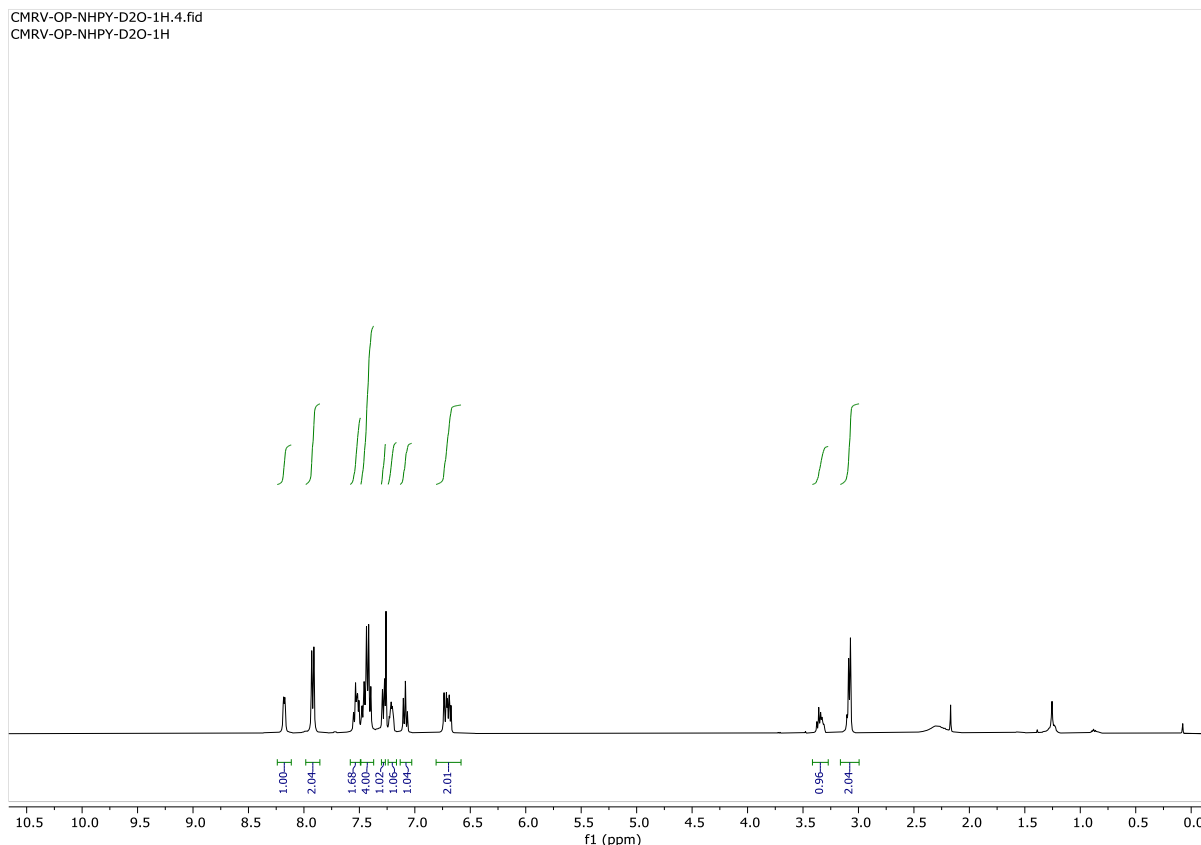

After this deuteration study with coupling partner, we have taken an oven-dried reaction tube, charged with magnetic stir-bar,  $[\text{RhCp}^*\text{Cl}_2]_2$  (2.5 mol%), AgOAc (2 eq.), NaOAc (1 eq.), **42** (1 eq.) were added followed by addition of MeOH/D<sub>2</sub>O (1.6/0.4 ml), via syringe. The reaction mixture was allowed to stir at 70 °C for 6 h. Then, the mixture was cooled and diluted with CH<sub>2</sub>Cl<sub>2</sub> (10 mL). The mixture was filtered through a Celite pad and washed with CH<sub>2</sub>Cl<sub>2</sub> (3 × 10 mL). The filtrate was concentrated under reduced pressure. The residue was purified by silica gel column chromatography using hexane/ethyl acetate as eluent to afford product **42** with incorporation of deuterium. From here we can clearly confirm that deuteration obtained due to acidic nature of  $\alpha$ -proton to the carbonyl.

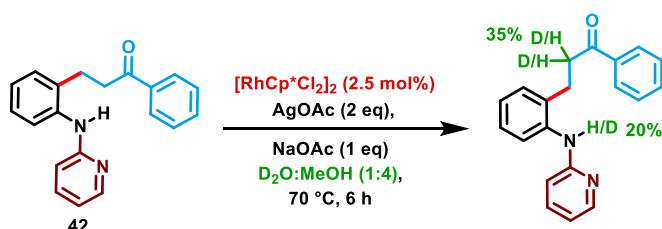



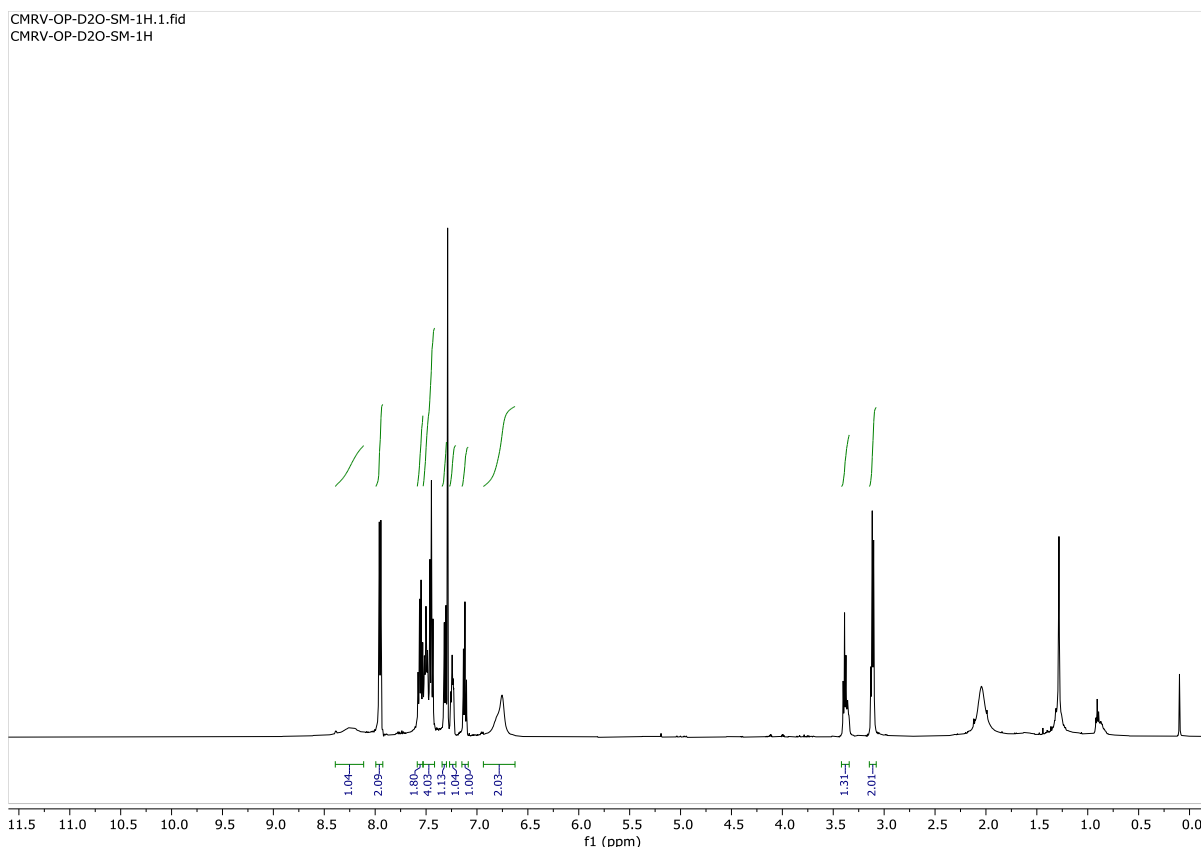

## (b) control experiment

### 1. Reaction with 2-tosylaminobenzaldehyde:

In an oven-dried reaction tube, charged with magnetic stir-bar,  $[\text{RhCp}^*\text{Cl}_2]_2$  (2.5 mol%),  $\text{Ag}_2\text{CO}_3$  (0.2 mmol), NaOAc (0.2 mmol), 2-tosylaminobenzaldehyde **1** (0.2 mmol, 1 eq.) and phenyl vinyl ketone **59** (0.2 mmol, 1 eq.) were added followed by addition of 2 ml of 1,2-dichloroethane via syringe. The reaction mixture was allowed to stir at 70 °C for 8 h. Then, the mixture was cooled and diluted with  $\text{CH}_2\text{Cl}_2$  (10 mL). The mixture was filtered through a Celite pad and washed with  $\text{CH}_2\text{Cl}_2$  ( $3 \times 10$  mL). The filtrate was concentrated under reduced pressure. The residue was purified by silica gel column chromatography using hexane/ethyl acetate as eluent to afford the desired pure product **3** in 28% yield.

### 2. Reaction with N-phenyl aminopyridine

In an oven-dried reaction tube, charged with magnetic stir-bar,  $[\text{RhCp}^*\text{Cl}_2]_2$  (2.5 mol%), AgOAc (2 eq.), NaOAc (1 eq.), N-phenyl aminopyridine **1** (34 mg, 0.2 mmol) and phenyl vinyl ketone **59** (0.2 mmol, 1 eq.) were added followed by addition of 2 ml of MeOH via syringe. The reaction mixture was allowed to stir at room temperature for 3 h. Then, the mixture was cooled and diluted with  $\text{CH}_2\text{Cl}_2$  (10 mL). The mixture was filtered through a Celite pad and

washed with CH<sub>2</sub>Cl<sub>2</sub> (3 × 10 mL). The filtrate was concentrated under reduced pressure. The residue was purified by silica gel column chromatography using hexane/ethyl acetate as eluent to afford the desired pure product **42** in 32% yield. This indicated that the presence of an  $\alpha,\beta$ -unsaturated ketone intermediate in the catalytic cycle.

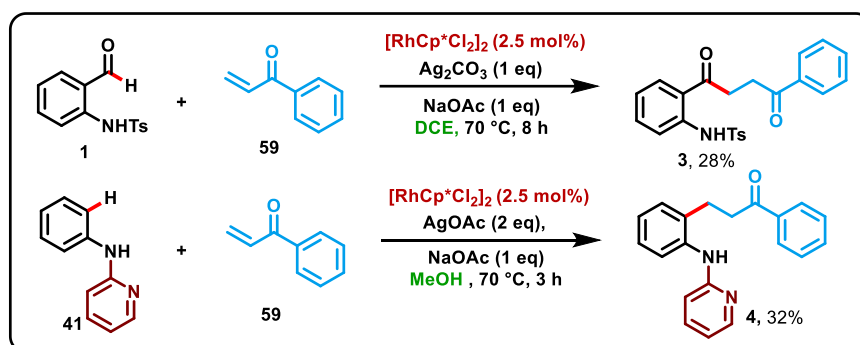

### (c) Reaction with other protecting group

**1.** In an oven-dried reaction tube, charged with magnetic stir-bar, [RhCp\*Cl<sub>2</sub>]<sub>2</sub> (2.5 mol%), Ag<sub>2</sub>CO<sub>3</sub> (0.2 mmol), NaOAc (0.2 mmol), methyl (2-formylphenyl)carbamate **60** (0.2 mmol, 1 eq.) and cyclopropanol **2** (0.3 mmol, 1.5 equiv) were added followed by addition of 2 ml of MeCN *via* syringe. The reaction mixture was allowed to stir at 80 °C temperature for 12 h. Then, the mixture was cooled and diluted with CH<sub>2</sub>Cl<sub>2</sub> (10 mL). The mixture was filtered through a Celite pad and washed with CH<sub>2</sub>Cl<sub>2</sub> (3 × 10 mL). The filtrate was concentrated under reduced pressure. The residue was purified by silica gel column chromatography using hexane/ethyl acetate (85:15) as eluent to afford the butenolide derivative **61** in 23% yield.

**2.** In an oven-dried reaction tube, charged with magnetic stir-bar, Cu(OAc)<sub>2</sub>·H<sub>2</sub>O (0.4 mmol), NaOAc (0.2 mmol), methyl (2-formylphenyl)carbamate **60** (0.2 mmol, 1 eq.) and cyclopropanol **2** (0.3 mmol, 1.5 equiv) were added followed by addition of 2 ml of DMSO *via* syringe. The reaction mixture was allowed to stir at 80 °C temperature for 12 h. Then, the mixture was cooled and diluted with CH<sub>2</sub>Cl<sub>2</sub> (10 mL). The mixture was filtered through a Celite pad and washed with CH<sub>2</sub>Cl<sub>2</sub> (3 × 10 mL). The filtrate was concentrated under reduced pressure. The residue was purified by silica gel column chromatography using hexane/ethyl acetate (80:20) as eluent to afford the methyl 3-benzoylquinoline-1(2H)-carboxylate **62** in 76% yield.

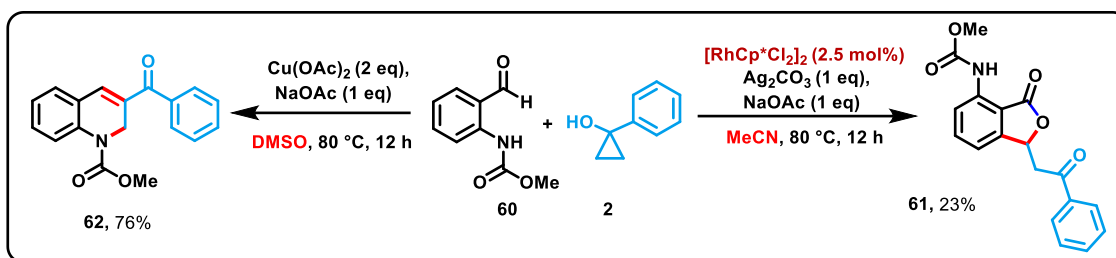

## 5. Proposed mechanism

### 1. Mechanism for 1,4-diketones

*N*-tosyl 2-amino benzaldehyde undergoes anion exchange followed by the subsequent C–H activation with active Rh(III) catalyst to form the five-membered rhodacycle **A**. Intermediate **A** on ligand exchange with the cyclopropanol **2** forms **B** and subsequent  $\beta$ -carbon elimination leads to the Rh(III) alkyl species **C**. Intermediate **C** then undergoes  $\beta$ -hydride elimination to form **D**, which can undergo migratory insertion to form **E** which under reductive elimination to furnish the 1,4-diketone **3** along with a Rh(I) species, which can be oxidized by Ag(I) to regenerate the active catalyst.

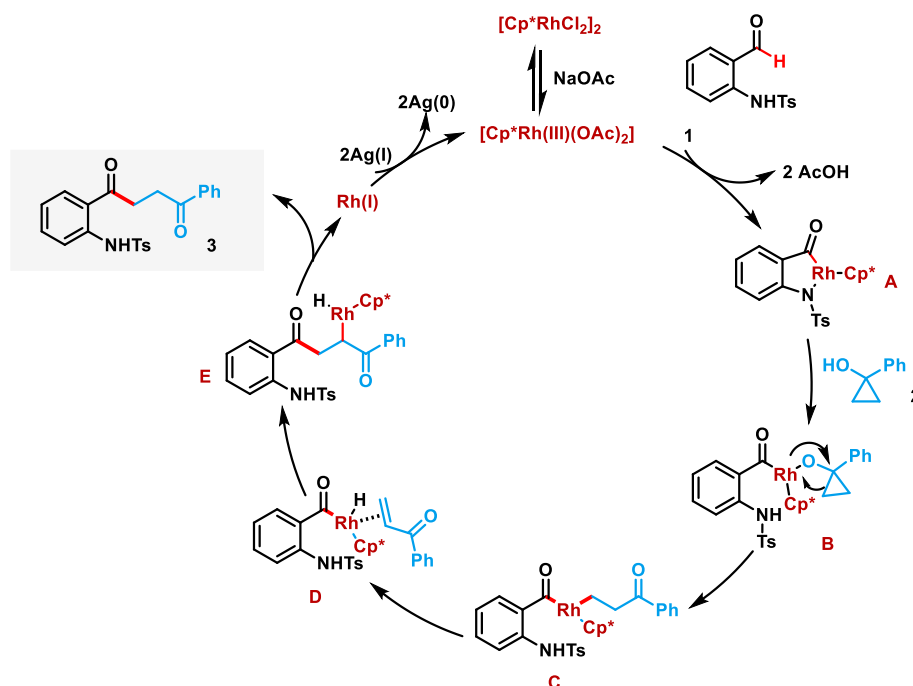

### 2. Mechanism for $\beta$ -aryl ketone

Active catalyst **I** is generated from  $[\text{RhCp}^*\text{Cl}_2]_2$  in the presence of  $\text{NaOAc}$  undergoes directed ortho-metalation to *N*-aryl aminopyridine in a reversible manner to generate six-membered rhodacycle **A**, which undergoes ligand exchange with the cyclopropanol **2** forms **B** and subsequent  $\beta$ -carbon elimination leads to the Rh(III) alkyl species **C**. Intermediate **C** then

undergoes  $\beta$ -hydride elimination to form **D**, which can undergo migratory insertion to form **E** which under reductive elimination to furnish the  $\beta$ -aryl ketone **3** along with a Rh(I) species, which can be oxidized by Ag(I) to regenerate the active catalyst.

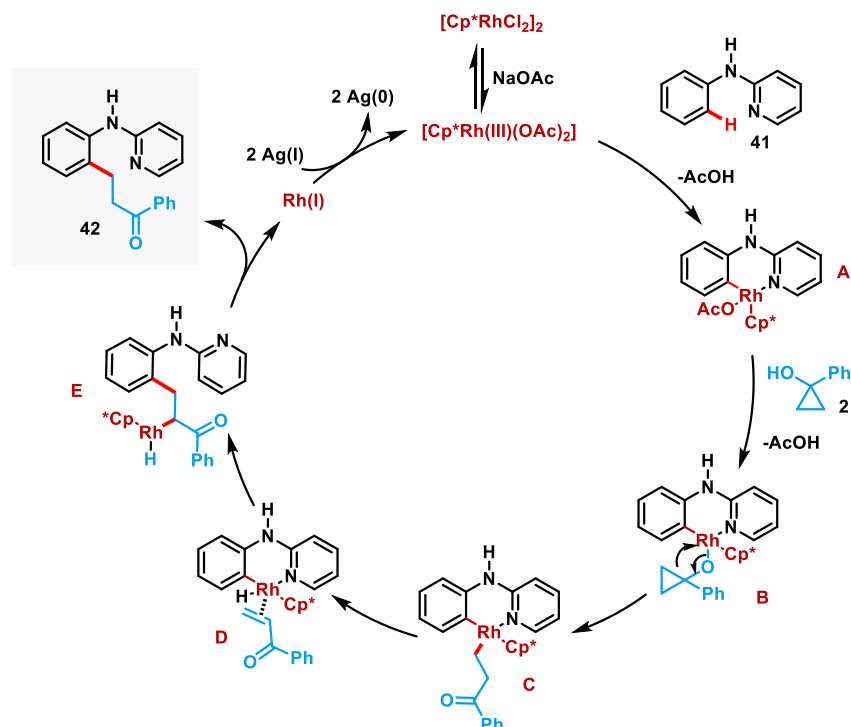

### 3. Mechanism for 2-alkyl indole derivative

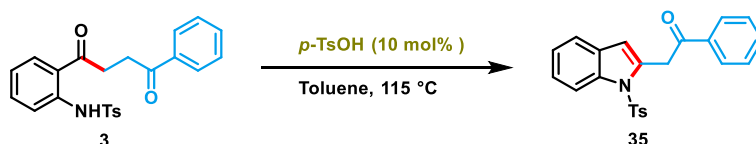

In presence of acid, **3** undergoes Paal-Knorr synthesis to generate furan **A** which rearranges to generate **B**. From intermediate **B**, nucleophilic addition happens to generate **C** which on subsequent ring opening deliver **D**. The intermediate **D** tautomerise to give **35**.

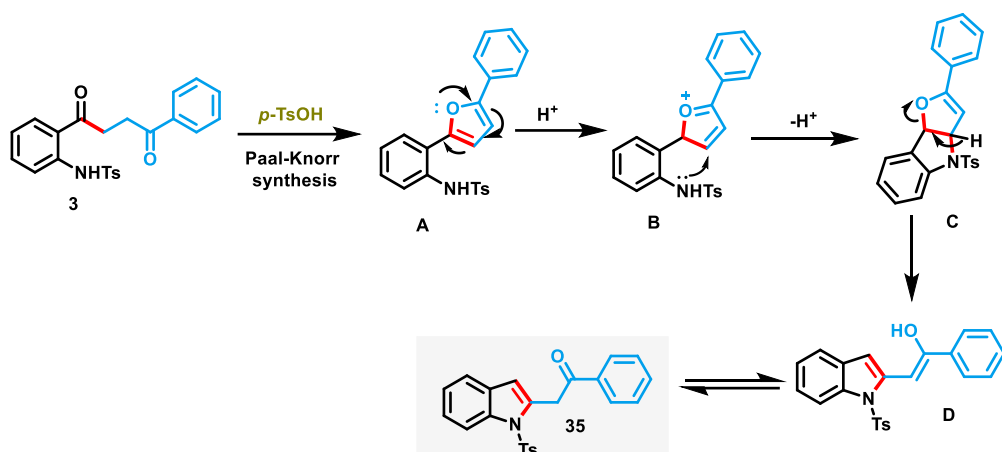

## 6. Scale up and functionalization:

**(a) Scale-up reaction:** An oven-dried 25 mL round bottom flask equipped with a magnetic stir bar was charged with  $[\text{RhCp}^*\text{Cl}_2]_2$  (2.5 mol%), 2-aminobenzaldehyde **1** (0.5 g, 1 eq.) and cyclopropanol **2a** (1.5 equiv),  $\text{Ag}_2\text{CO}_3$  (1 equiv.),  $\text{NaOAc}$  (1 equiv.), were added followed by addition of 10 ml of 1,2-dichloroethane via syringe. The reaction mixture was allowed to stir at  $70^\circ\text{C}$  for 14 h. On completion the mixture was filtered through a Celite pad and washed with  $\text{CH}_2\text{Cl}_2$  ( $3 \times 15$  mL). The filtrate was concentrated under reduced pressure. The residue was purified by silica gel column chromatography using hexane/ethyl acetate as eluent to afford the corresponding product **3** was isolated as white solid with yield of **70%** (0.51g).

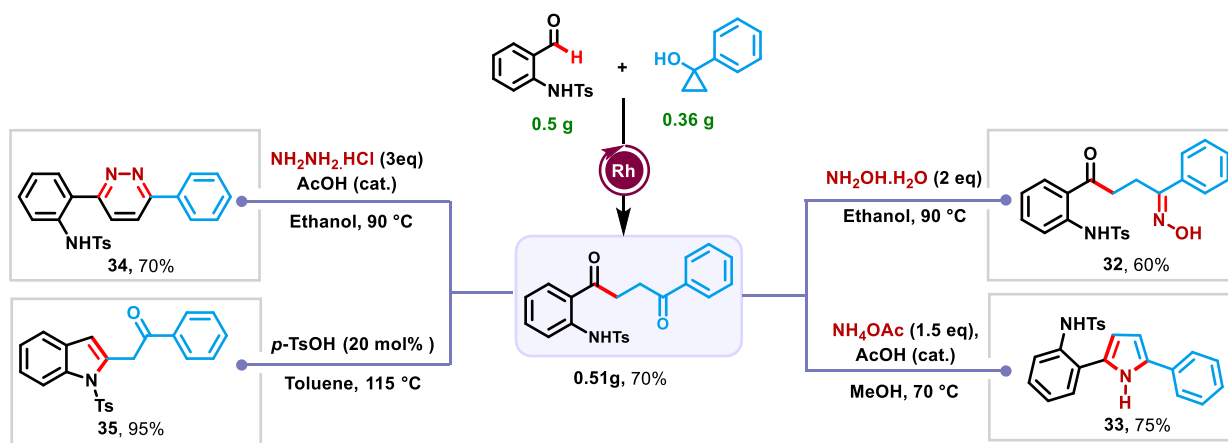

### Synthesis of 32

To a 25 mL round bottom flask was added **3** (1.0 equiv) in 3 ml ethanol as reaction solvent followed by  $\text{NH}_2\text{OH}\cdot\text{H}_2\text{O}$  (2.0 equiv). The resulting reaction mixture was stirred at  $90^\circ\text{C}$  for 10 h. On completion of the reaction, the solvent was removed under reduced pressure, and the crude product was purified by column chromatography (PE/EA = 85/15) to afford compound **32** as light yellow oil with 60% yield.

*(Z)-N-(2-(4-(hydroxyimino)-4-phenylbutanoyl)phenyl)-4-methylbenzenesulfonamide*

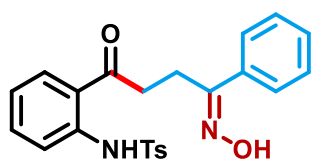

**32**, 60%

Purified by (petroleum ether/EtOAc: 75/25), 51 mg, 60%, light yellow liquid.

**<sup>1</sup>H NMR (500 MHz, CDCl<sub>3</sub>)** δ 11.36 (s, 1H), 7.78 (dd, *J* = 8.0, 1.6 Hz, 1H), 7.73 (d, *J* = 8.4 Hz, 2H), 7.67 (d, *J* = 8.5 Hz, 1H), 7.62 (d, *J* = 1.8 Hz, 1H), 7.44 (dd, *J* = 7.2, 1.5 Hz, 2H), 7.41 – 7.39 (m, 3H), 7.21 (d, *J* = 8.4 Hz, 2H), 7.02 (t, *J* = 7.7 Hz, 1H), 3.22 – 3.16 (m, 2H), 3.14 – 3.07 (m, 2H), 2.33 (s, 3H).

**<sup>13</sup>C NMR (126 MHz, CDCl<sub>3</sub>)** δ 202.8, 158.6, 143.9, 140.0, 136.6, 135.0, 134.9, 131.0, 129.7, 128.8, 127.3, 126.2, 122.7, 122.1, 119.5, 35.9, 21.5, 21.3

**HRMS (ESI-TOF)** *m/z*: [M + H]<sup>+</sup> calcd for C<sub>23</sub>H<sub>23</sub>N<sub>2</sub>O<sub>4</sub>S 423.1373, found 423.1382

**Synthesis of 33**

To a 25 mL round bottom flask was added **3** (1.0 equiv) in 3 ml methanol as reaction solvent followed by NH<sub>4</sub>OAc (2.0 equiv). Then AcOH (2-3 drops) was added in the rb. The resulting reaction mixture was stirred at 70 °C for 12 h. On completion of the reaction, the solvent was removed under reduced pressure, and the crude product was purified by column chromatography (PE/EA = 80/20) to afford compound **32** as white sticky solid with 75% yield.

*4-methyl-N-(2-(5-phenyl-1H-pyrrol-2-yl)phenyl)benzenesulfonamide*

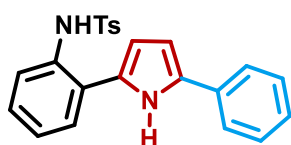

**33**, 75%

Purified by (petroleum ether/EtOAc: 80/20), 58 mg, 75%, white solid.

**<sup>1</sup>H NMR (400 MHz, CDCl<sub>3</sub>)** δ 7.56 (d, *J* = 8.4 Hz, 2H), 7.49 (dd, *J* = 8.3, 1.3 Hz, 2H), 7.39 (t, *J* = 7.8 Hz, 2H), 7.37 – 7.33 (m, 2H), 7.26 – 7.24 (m, 1H), 7.23 – 7.19 (m, 2H), 7.15 (d, *J* = 7.9 Hz, 2H), 6.56 (d, *J* = 3.5 Hz, 1H), 6.21 (d, *J* = 3.5 Hz, 1H), 2.31 (s, 3H).

**<sup>13</sup>C NMR (101 MHz, CDCl<sub>3</sub>)** δ 144.0, 136.0, 133.9, 133.1, 132.2, 129.7, 129.4, 128.99, 128.35, 128.22, 127.78, 127.37, 126.63, 126.28, 124.5, 123.9, 110.3, 107.2, 21.5

**HRMS (ESI-TOF)** *m/z*: [M + H]<sup>+</sup> calcd for C<sub>23</sub>H<sub>21</sub>N<sub>2</sub>O<sub>2</sub>S 389.1318, found 389.1321

**Synthesis of 34**

A 25 mL round bottom flask was charged with **3** (1.0 equiv) in 3 mL ethanol as reaction solvent and NH<sub>2</sub>NH<sub>2</sub>·HCl (3.0 equiv) was added in one portion. The resulting mixture was stirred for

16 h at 90 °C. On completion of the reaction, the solvent was removed under reduced pressure followed by purification by flash column chromatography (PE/EA = 85/15) to afford compound 34 light yellow oil with 70% yield.

**4-methyl-N-(2-(6-phenylpyridazin-3-yl)phenyl)benzenesulfonamide**

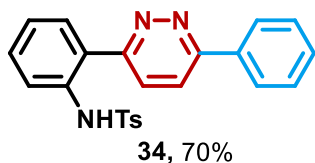

Purified by (petroleum ether/EtOAc: 80/20), 56 mg, 70%, white sticky solid.

**<sup>1</sup>H NMR (500 MHz, CDCl<sub>3</sub>)** δ 11.45 (s, 1H), 8.10 (dd, *J* = 7.9, 1.8 Hz, 2H), 7.83 (d, *J* = 9.0 Hz, 1H), 7.77 (d, *J* = 8.4 Hz, 1H), 7.61 – 7.54 (m, 4H), 7.50 (dd, *J* = 7.8, 1.7 Hz, 1H), 7.44 (td, *J* = 7.9, 1.8 Hz, 1H), 7.41 (d, *J* = 8.2 Hz, 2H), 7.24 (d, *J* = 7.6 Hz, 1H), 6.95 (d, *J* = 8.2 Hz, 2H), 2.26 (s, 3H).

**<sup>13</sup>C NMR (126 MHz, CDCl<sub>3</sub>)** δ 158.3, 157.5, 143.0, 136.7, 136.5, 135.5, 131.1, 130.6, 129.3, 129.2, 128.6, 127.0, 126.9, 126.2, 125.7, 125.2, 124.7, 124.6, 21.4

**HRMS (ESI-TOF)** *m/z*: [M + H]<sup>+</sup> calcd for C<sub>23</sub>H<sub>20</sub>N<sub>2</sub>O<sub>2</sub>S 402.1271, found 402.1269

**Synthesis of 35**

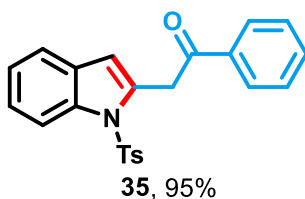

To a 25 mL round bottom flask was charged with **3** (1.0 equiv) in 3 ml toluene as solvent followed by PTSA. H<sub>2</sub>O (10 mol%) was added in the rb. The resulting reaction mixture was stirred at 115 °C for 6 h. On completion of the reaction, the solvent was removed under reduced pressure, and the crude product was purified by column chromatography (PE/EA = 80/20) to afford compound 32 as white sticky solid with 95% yield.

Purified by (petroleum ether/EtOAc: 95/5), 74 mg, 95%, white solid.

**<sup>1</sup>H NMR (500 MHz, CDCl<sub>3</sub>)** δ 8.03 (dd, *J* = 8.4, 1.4 Hz, 2H), 7.97 (d, *J* = 8.2 Hz, 1H), 7.71 (d, *J* = 8.4 Hz, 2H), 7.62 – 7.57 (m, 1H), 7.49 (t, *J* = 7.7 Hz, 2H), 7.45 (dd, *J* = 7.2, 1.4 Hz, 1H), 7.24 (dd, *J* = 8.4, 1.4 Hz, 1H), 7.21 (d, *J* = 7.8 Hz, 3H), 6.53 (s, 1H), 4.74 (s, 2H), 2.34 (s, 3H).

**<sup>13</sup>C NMR (101 MHz, CDCl<sub>3</sub>)** δ 195.7, 144.9, 136.8, 136.49, 136.04, 134.3, 133.3, 129.82, 129.35, 128.73, 128.46, 126.8, 124.3, 123.4, 120.6, 114.4, 112.2, 39.2, 21.6

**HRMS (ESI-TOF)** *m/z*: [M + H]<sup>+</sup> calcd for C<sub>23</sub>H<sub>20</sub>NO<sub>3</sub>S 390.1158, found 390.1160

**3-phenyl-1-(1-tosyl-1H-indol-2-yl)pentan-2-one**

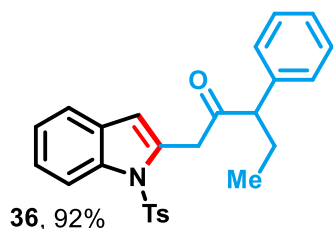

Purified by (petroleum ether/EtOAc: 80/20), 80 mg, 92%, light yellow liquid.

**<sup>1</sup>H NMR (400 MHz, CDCl<sub>3</sub>)** δ 7.92 (d, *J* = 8.3 Hz, 1H), 7.61 (d, *J* = 8.5 Hz, 2H), 7.40 (dd, *J* = 8.0, 1.4 Hz, 1H), 7.37 – 7.33 (m, 2H), 7.32 – 7.28 (m, 1H), 7.26 – 7.23 (m, 2H), 7.21 (dd, *J* = 8.3, 1.6 Hz, 1H), 7.20 – 7.14 (m, 3H), 6.34 (s, 1H), 4.23 (d, *J* = 17.8 Hz, 1H), 3.81 (d, *J* = 17.8 Hz, 1H), 3.76 (dd, *J* = 8.7, 6.4 Hz, 1H), 2.33 (s, 3H), 2.15 (m, 1H), 1.80 – 1.72 (m, 1H), 0.83 (t, *J* = 7.4 Hz, 3H).

**<sup>13</sup>C NMR (101 MHz, CDCl<sub>3</sub>)** δ 205.8, 144.8, 138.8, 136.6, 136.0, 134.1, 129.8, 129.3, 128.92, 128.66, 127.3, 126.6, 124.3, 123.4, 120.5, 114.4, 112.4, 60.4, 42.1, 25.2, 21.6, 11.9

**HRMS (ESI-TOF)** *m/z*: [M + H]<sup>+</sup> calcd for C<sub>26</sub>H<sub>26</sub>NO<sub>3</sub>S 432.1628, found 432.1632

**1-(2-chlorophenyl)-3-(1-tosyl-1H-indol-2-yl)propan-2-one**

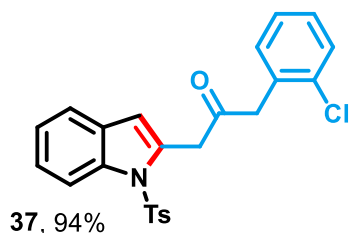

Purified by (petroleum ether/EtOAc: 80/20), 82 mg, 94%, white sticky solid.

**<sup>1</sup>H NMR (400 MHz, CDCl<sub>3</sub>)** δ 7.92 (dd, *J* = 8.2, 1.0 Hz, 1H), 7.64 (d, *J* = 8.4 Hz, 2H), 7.44 (dd, *J* = 6.9, 1.5 Hz, 1H), 7.41 – 7.38 (m, 1H), 7.33 – 7.29 (m, 1H), 7.25 (d, *J* = 1.6 Hz, 1H), 7.25 – 7.22 (m, 2H), 7.21 (dd, *J* = 3.4, 1.6 Hz, 1H), 7.18 (d, *J* = 7.6 Hz, 2H), 6.52 (s, 1H), 4.17 (s, 2H), 4.04 (s, 2H), 2.32 (s, 3H).

**<sup>13</sup>C NMR (101 MHz, CDCl<sub>3</sub>)** δ 202.4, 144.9, 136.7, 135.9, 134.5, 133.7, 132.7, 132.2, 129.9, 129.5, 129.3, 128.7, 127.1, 126.7, 124.4, 123.5, 120.6, 114.4, 112.7, 47.2, 42.6, 21.6

**HRMS (ESI-TOF)** *m/z*: [M + H]<sup>+</sup> calcd for C<sub>24</sub>H<sub>21</sub>ClNO<sub>3</sub>S 438.0925, found 438.0927

**5-phenyl-1-(1-tosyl-1H-indol-2-yl)pentan-2-one**



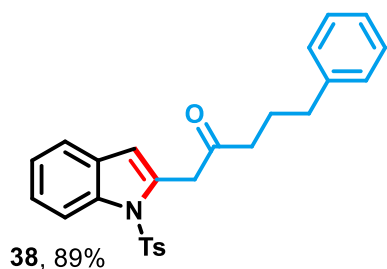

Purified by (petroleum ether/EtOAc: 80/20), 77 mg, 89%, light yellow liquid.

**<sup>1</sup>H NMR (400 MHz, CDCl<sub>3</sub>)** δ 7.93 (d, *J* = 8.3 Hz, 1H), 7.67 (d, *J* = 8.4 Hz, 2H), 7.45 (dd, *J* = 6.5, 1.4 Hz, 1H), 7.31 – 7.26 (m, 2H), 7.24 (d, *J* = 1.6 Hz, 1H), 7.23 – 7.20 (m, 3H), 7.19 – 7.17 (m, 3H), 6.49 (s, 1H), 4.08 (s, 2H), 2.66 – 2.60 (m, 4H), 2.33 (s, 3H), 2.00 – 1.95 (m, 2H).

**<sup>13</sup>C NMR (101 MHz, CDCl<sub>3</sub>)** δ 205.9, 144.9, 141.7, 136.6, 135.96, 134.1, 129.85, 129.27, 128.53, 128.38, 126.7, 125.9, 124.4, 123.5, 120.6, 114.4, 112.3, 43.1, 41.4, 35.1, 25.1, 21.6

**HRMS (ESI-TOF)** *m/z*: [M + H]<sup>+</sup> calcd for C<sub>26</sub>H<sub>26</sub>NO<sub>3</sub>S 432.1628, found 432.1630.

**6-(2,5-dimethylphenoxy)-3,3-dimethyl-1-(1-tosyl-1H-indol-2-yl)hexan-2-one**

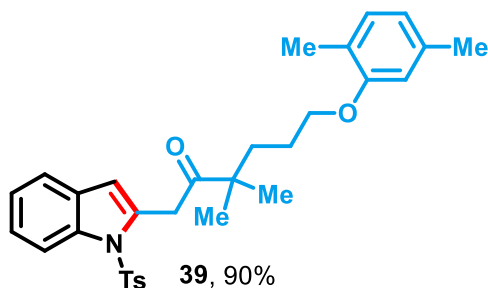

Purified by (petroleum ether/EtOAc: 80/20), 93 mg, light yellow liquid.

**<sup>1</sup>H NMR (500 MHz, CDCl<sub>3</sub>)** δ 7.88 (d, *J* = 7.9 Hz, 1H), 7.70 (d, *J* = 8.4 Hz, 2H), 7.42 (d, *J* = 8.7 Hz, 1H), 7.22 – 7.17 (m, 4H), 7.00 (d, *J* = 7.5 Hz, 1H), 6.67 (d, *J* = 7.5 Hz, 1H), 6.62 (s, 1H), 6.41 (s, 1H), 4.33 (s, 2H), 3.94 (t, *J* = 6.0 Hz, 2H), 2.32 (s, 3H), 2.31 (s, 3H), 2.18 (s, 3H), 1.86 – 1.82 (m, 2H), 1.80 – 1.75 (m, 2H), 1.30 (s, 6H).

**<sup>13</sup>C NMR (126 MHz, CDCl<sub>3</sub>)** δ 210.7, 156.9, 144.7, 136.8, 136.55, 136.17, 134.7, 130.3, 129.75, 129.37, 126.8, 124.1, 123.54, 123.34, 120.76, 120.47, 114.4, 112.0, 67.9, 47.6, 37.9, 36.6, 24.9, 24.8, 21.5, 21.4, 15.9

**HRMS (ESI-TOF)** *m/z*: [M + H]<sup>+</sup> calcd for C<sub>31</sub>H<sub>36</sub>NO<sub>4</sub>S 518.2360, found 518.2368.

**2-(1-((4-chlorophenyl)sulfonyl)-1H-indol-2-yl)-1-phenylethan-1-one**

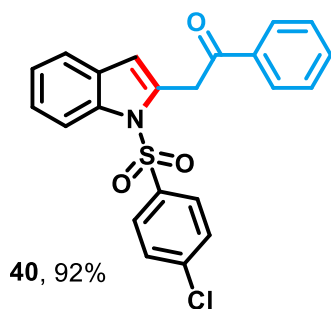

Purified by (petroleum ether/EtOAc: 75/25), 75 mg, light yellow liquid.

$^1\text{H NMR}$  (400 MHz,  $\text{CDCl}_3$ )  $\delta$  8.05 (dd,  $J = 8.4, 1.4$  Hz, 2H), 7.93 – 7.89 (m, 1H), 7.82 – 7.78 (m, 2H), 7.66 – 7.61 (m, 1H), 7.56 – 7.49 (m, 3H), 7.43 – 7.40 (m, 2H), 7.28 – 7.22 (m, 2H), 6.60 (s, 1H), 4.77 (s, 2H).

$^{13}\text{C NMR}$  (101 MHz,  $\text{CDCl}_3$ )  $\delta$  195.8, 140.4, 137.3, 136.6, 136.4, 134.4, 133.5, 129.51, 129.38, 128.80, 128.40, 128.36, 124.5, 123.8, 120.8, 114.2, 112.9, 39.2

HRMS (ESI-TOF)  $m/z$ :  $[\text{M} + \text{H}]^+$  calcd for  $\text{C}_{22}\text{H}_{17}\text{ClNO}_3\text{S}$  410.0612, found 410.0615.

### (b) Scale up and functionalization of N-phenyl aminopyridine:

**Scale-up reaction:** An oven-dried 25 mL round bottom flask equipped with a magnetic stir bar was charged with  $[\text{RhCp}^*\text{Cl}_2]_2$  (2.5 mol%), AgOAc (2 eq.), NaOAc (1 eq.) N-phenyl aminopyridine **41** (0.5g, 1 eq.) and cyclopropanol **2** ( 2 eq.) were added followed by addition of 10 ml of MeOH via syringe. The reaction mixture was allowed to stir at 70 °C for 6 h. Then, the mixture was cooled and diluted with  $\text{CH}_2\text{Cl}_2$  (10 mL). On completion the mixture was filtered through a Celite pad and washed with  $\text{CH}_2\text{Cl}_2$  ( $3 \times 10$  mL). The filtrate was concentrated under reduced pressure. The residue was purified by silica gel column chromatography using hexane/ethyl acetate as eluent to afford the corresponding product **42** was isolated as white solid with yield of **79%** (0. 7g).

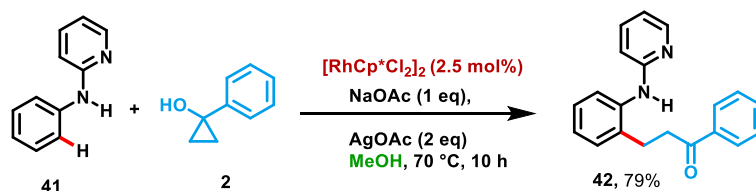

### Functionalization:

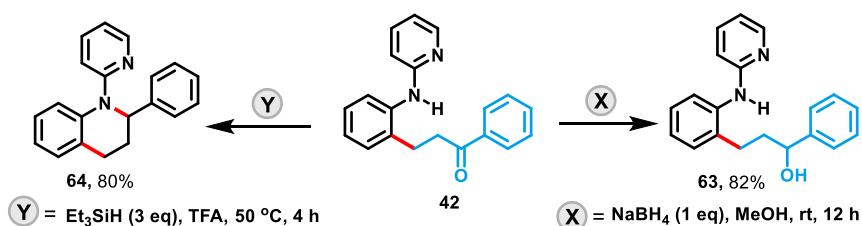

### **Reduction of 42:**

A 25 mL round bottom flask was charged with **42** (0.2 mmol, 1.0 equiv) in 3 mL methanol as reaction solvent and NaBH<sub>4</sub> (1 eq.) was added slowly within 10-15 minutes at low temperature. The resulting mixture was stirred for 10 h at room temperature. On completion of the reaction, the solvent was removed under reduced pressure followed by purification by flash column chromatography (PE/EA = 80/20) to afford compound **63** light brown oil with 82% yield.

### ***1-phenyl-3-(2-(pyridin-2-ylamino)phenyl)propan-1-ol***

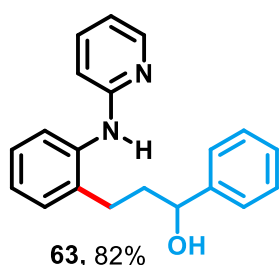

Purified by (petroleum ether/EtOAc: 80/20), 50 mg, light brown liquid.

<sup>1</sup>H NMR (400 MHz, CDCl<sub>3</sub>) δ 7.98 (dd, *J* = 5.2, 2.3 Hz, 1H), 7.52 – 7.34 (m, 3H), 7.31 – 7.25 (m, 4H), 7.25 – 7.18 (m, 3H), 7.08 (t, *J* = 8.2 Hz, 1H), 6.71 (d, *J* = 8.4 Hz, 1H), 6.67 – 6.60 (m, 1H), 4.62 (dd, *J* = 9.3, 4.0 Hz, 1H), 3.38 (s, 1H), 2.89 – 2.71 (m, 2H), 2.11 – 2.02 (m, 1H), 1.97 – 1.88 (m, 1H).

<sup>13</sup>C NMR (101 MHz, CDCl<sub>3</sub>) δ 157.0, 147.9, 144.9, 138.6, 138.0, 134.9, 130.6, 128.5, 127.5, 126.97, 125.9, 124.5, 123.0, 114.5, 108.2, 72.8, 39.9, 27.6

HRMS (ESI-TOF) *m/z*: [M + Na]<sup>+</sup> calcd for C<sub>20</sub>H<sub>20</sub>N<sub>2</sub>NaO 327.1468, found 327.1469

### **Synthesis of 64:**

A 25 mL round bottom flask was charged with **42** (0.2 mmol, 1.0 eq.) was dissolved in TFA (1 mL) in a round bottomed flask. Et<sub>3</sub>SiH (3 eq.) was added, and the mixture was stirred at 50 °C under argon for 4 h. On completion of the reaction, the solvents were removed under reduced pressure. The mixture was extracted with EtOAc (3 × 10 mL). The combined organic layers were dried over Na<sub>2</sub>SO<sub>4</sub>, filtered, and evaporated in vacuo. The product was purified by silica gel column chromatography (petroleum ether/EtOAc: 95/5) to give the pure **64** as a colorless oil in 80% yield.

### ***2-phenyl-1-(pyridin-2-yl)-1,2,3,4-tetrahydroquinoline***

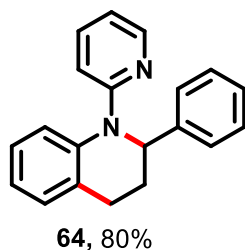

Purified by (petroleum ether/EtOAc: 95/5), 46 mg, colourless liquid.

**<sup>1</sup>H NMR (500 MHz, CDCl<sub>3</sub>)** δ 8.24 (dd, *J* = 5.3, 2.5 Hz, 1H), 7.46 – 7.41 (m, 2H), 7.32 (d, *J* = 7.5 Hz, 2H), 7.27 – 7.24 (m, 2H), 7.19 – 7.15 (m, 1H), 7.14 – 7.10 (m, 2H), 7.07 (dd, *J* = 7.6, 1.5 Hz, 1H), 6.90 (td, *J* = 7.3, 1.2 Hz, 1H), 6.75 (dd, *J* = 7.2, 4.0 Hz, 1H), 5.68 (t, *J* = 5.4 Hz, 1H), 2.71 – 2.65 (m, 1H), 2.64 – 2.56 (m, 1H), 2.46 – 2.39 (m, 1H), 2.22 – 2.16 (m, 1H).

**<sup>13</sup>C NMR (126 MHz, CDCl<sub>3</sub>)** δ 158.6, 148.5, 143.5, 140.8, 137.2, 129.5, 129.2, 128.5, 126.5, 126.4, 126.4, 121.7, 120.8, 116.2, 113.1, 59.1, 30.5, 24.6.

**HRMS (ESI-TOF)** *m/z*: [M + H]<sup>+</sup> calcd for C<sub>20</sub>H<sub>19</sub>N<sub>2</sub> 287.1543, found 287.1543.

### (c) Removal of tosyl protecting group:

A 25 mL round bottom flask was charged with **3** (0.2 mmol) was dissolved in TFA (1 mL) in a round bottomed flask 1.0 mmol) was added to conc. H<sub>2</sub>SO<sub>4</sub> (5 mL) at 0 °C. The mixture was stirred for 3 h. After completion, the reaction mixture was quenched with NaHCO<sub>3</sub> solution and the resulting mixture was extracted with EtOAc (3 × 10 mL). The organic layers were dried over anhydrous Na<sub>2</sub>SO<sub>4</sub>, and was concentrated under vacuum to give **65** as white solid in 70 % yield.

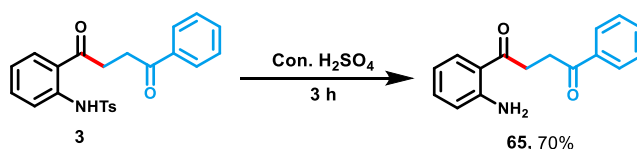

### *1-(2-aminophenyl)-4-phenylbutane-1,4-dione*

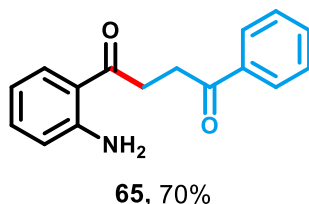

Purified by (petroleum ether/EtOAc: 90/10), 35 mg, white solid.

**<sup>1</sup>H NMR (400 MHz, CDCl<sub>3</sub>)** δ 8.05 (d, *J* = 7.9 Hz, 2H), 7.89 (dd, *J* = 8.2, 1.6 Hz, 1H), 7.58 (t, *J* = 7.3 Hz, 1H), 7.48 (t, *J* = 7.7 Hz, 2H), 7.28 (d, *J* = 8.4 Hz, 1H), 6.72 – 6.61 (m, 2H), 3.49 – 3.44 (m, 2H), 3.44 – 3.39 (m, 2H).

$^{13}\text{C}$  NMR (101 MHz,  $\text{CDCl}_3$ )  $\delta$  200.7, 199.2, 150.3, 137.0, 134.5, 133.2, 131.3, 128.7, 128.3, 118.0, 117.5, 116.1, 33.2, 32.8.

HRMS (ESI-TOF)  $m/z$ :  $[\text{M} + \text{Na}]^+$  calcd for  $\text{C}_{16}\text{H}_{15}\text{NNaO}_2$  276.0995, found 276.0996.

## 7. References:

1. (a) Wang, H.; Xie, F.; Qi, Z.; Li, X. *Org. Lett.* **2015**, *17*, 920–923. (b) Debbarma, S.; Sudan Maji, M. *E. J. Org. Chem.* **2017**, *2017*, 3699–3706. (c) Ai, W.; Wu, Y.; Tang, H.; Yang, X.; Yang, Y.; Li, Y.; Zhou, B. *Chem. Commun.* **2015**, *51*, 7871–7874.

2. (a) Rosa, D.; Orellana, A. *Chem. Commun.* **2013**, *49*, 5420. (b) Zhou, X.; Yu, S.; Kong, L.; Li, X. *ACS Catal.* **2016**, *6*, 647. (c) Zhou, X.; Qi, Z.; Yu, S.; Kong, L.; Li, Y.; Tian, W.-F.; Li, X. *Adv. Synth. Catal.* **2017**, *359*, 1620. (d) Zhan, J.-L.; Wu, M.-W.; Wei, D.; Wei, B.-Y.; Jiang, Y.; Yu, W.; Han, B. *ACS Catal.* **2019**, *9*, 4179. (e) Ganiu, M. O.; Cleveland, A. H.; Paul, J. L.; Kartika, R. *Org. Lett.* **2019**, *21*, 5611. (f) Pati, B. V.; Ghosh, A.; Ravikumar, P. C. *Org. Lett.* **2020**, *22*, 2854. (g) Fang, L.; Fan, S.; Wu, W.; Li, T.; Zhu, J. *Chem. Commun.* **2021**, *57*, 7386. (h) Lou, C.; Wang, X.; Lv, L.; Li, Z. *Org. Lett.* **2021**, *23*, 7608.

3. (a) X. Huang, S. Xu, Q. Tan, M. Gao, M. Lia and B. Xu, *Chem. Commun.*, 2014, *50*, 1465. (b) Ackermann, L.; Lygin, A. V. *Org. Lett.* **2012**, *14*, 764–767. (c) Qian, G.; Liu, B.; Tan, Q.; Zhang, S.; Xu, B. *Eur. J. Org. Chem.* **2014**, *2014*, 4837–4843. (d) Lv, S.; Han, X.; Wang, J.-Y.; Zhou, M.; Wu, Y.; Ma, L.; Niu, L.; Gao, W.; Zhou, J.; Hu, W.; Cui, Y.; Chen, J. *Angew. Chem., Int. Ed.* **2020**, *59*, 11583–11590. (e) Wang, Y.; Jia, D.; Zeng, J.; Liu, Y.; Bu, X.; Yang, X. *Org. Lett.* **2021**, *23*, 7740–7745. (f) Yan, X.; Ye, R.; Sun, H.; Zhong, J.; Xiang, H.; Zhou, X. *Org. Lett.* **2019**, *21*, 7455–7459.

**8. (a) X-ray Crystallography data for the compound of 7** Crystal of the compound **7** was obtained after slow evaporation of chloroform solvent. Molecular structure of **7** with 50% ellipsoid probability.

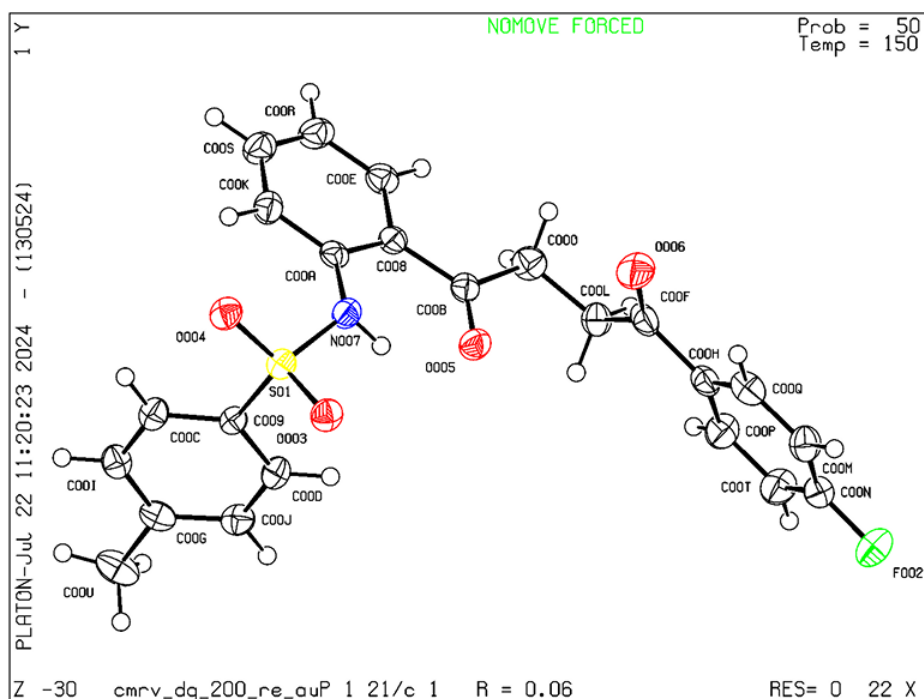

**Table 1 Crystal data and structure refinement for CMRV\_DG\_200\_RE\_autored.**

|                                        |                                                    |
|----------------------------------------|----------------------------------------------------|
| <b>Identification code</b>             | CMRV_DG_200_RE_autored                             |
| <b>Empirical formula</b>               | C <sub>23</sub> H <sub>20</sub> FNO <sub>4</sub> S |
| <b>Formula weight</b>                  | 425.46                                             |
| <b>Temperature/K</b>                   | 150.00(10)                                         |
| <b>Crystal system</b>                  | monoclinic                                         |
| <b>Space group</b>                     | P2 <sub>1</sub> /c                                 |
| <b>a/Å</b>                             | 21.0724(16)                                        |
| <b>b/Å</b>                             | 8.3789(4)                                          |
| <b>c/Å</b>                             | 11.4598(7)                                         |
| <b>α/°</b>                             | 90                                                 |
| <b>β/°</b>                             | 101.066(6)                                         |
| <b>γ/°</b>                             | 90                                                 |
| <b>Volume/Å<sup>3</sup></b>            | 1985.8(2)                                          |
| <b>Z</b>                               | 4                                                  |
| <b>ρ<sub>calc</sub>/cm<sup>3</sup></b> | 1.423                                              |
| <b>μ/mm<sup>-1</sup></b>               | 0.203                                              |
| <b>F(000)</b>                          | 888.0                                              |

|                                                                 |                                                               |
|-----------------------------------------------------------------|---------------------------------------------------------------|
| <b>Crystal size/mm<sup>3</sup></b>                              | 0.087 × 0.067 × 0.045                                         |
| <b>Radiation</b>                                                | Mo K $\alpha$ ( $\lambda$ = 0.71073)                          |
| <b>2<math>\theta</math> range for data collection/°</b>         | 3.938 to 49.996                                               |
| <b>Index ranges</b>                                             | -25 ≤ h ≤ 25, -9 ≤ k ≤ 9, -13 ≤ l ≤ 13                        |
| <b>Reflections collected</b>                                    | 40038                                                         |
| <b>Independent reflections</b>                                  | 3476 [R <sub>int</sub> = 0.1664, R <sub>sigma</sub> = 0.0679] |
| <b>Data/restraints/parameters</b>                               | 3476/0/272                                                    |
| <b>Goodness-of-fit on F<sup>2</sup></b>                         | 1.034                                                         |
| <b>Final R indexes [I ≥ 2<math>\sigma</math> (I)]</b>           | R <sub>1</sub> = 0.0555, wR <sub>2</sub> = 0.1280             |
| <b>Final R indexes [all data]</b>                               | R <sub>1</sub> = 0.0893, wR <sub>2</sub> = 0.1520             |
| <b>Largest diff. peak/hole / e <math>\text{\AA}^{-3}</math></b> | 0.25/-0.54                                                    |

**(b) X-ray Crystallography data for the compound of 35** Crystal of the compound 35 was obtained after slow evaporation of chloroform solvent. Molecular structure of 35 with 50% ellipsoid probability.

Datablock cmrv\_dg\_339\_autored - ellipsoid plot

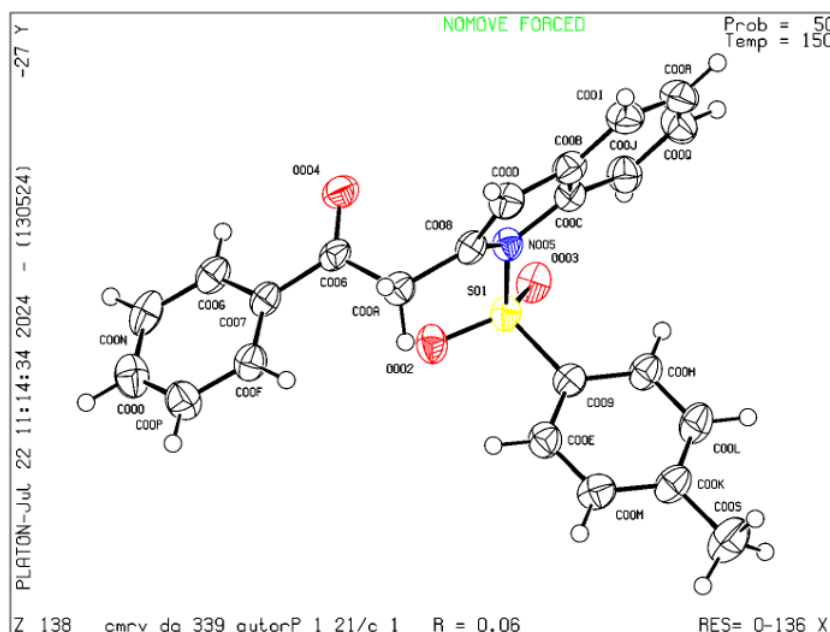

**Table 2 Crystal data and structure refinement for CMRV\_DG\_339\_autored.**

|                            |                                                   |
|----------------------------|---------------------------------------------------|
| <b>Identification code</b> | CMRV_DG_339_autored                               |
| <b>Empirical formula</b>   | C <sub>23</sub> H <sub>19</sub> NO <sub>3</sub> S |

|                                                   |                                                               |
|---------------------------------------------------|---------------------------------------------------------------|
| <b>Formula weight</b>                             | 389.45                                                        |
| <b>Temperature/K</b>                              | 150.00(10)                                                    |
| <b>Crystal system</b>                             | monoclinic                                                    |
| <b>Space group</b>                                | P2 <sub>1</sub> /c                                            |
| <b>a/Å</b>                                        | 9.7427(6)                                                     |
| <b>b/Å</b>                                        | 20.8546(7)                                                    |
| <b>c/Å</b>                                        | 10.5793(6)                                                    |
| <b>α/°</b>                                        | 90                                                            |
| <b>β/°</b>                                        | 114.951(7)                                                    |
| <b>γ/°</b>                                        | 90                                                            |
| <b>Volume/Å<sup>3</sup></b>                       | 1948.9(2)                                                     |
| <b>Z</b>                                          | 4                                                             |
| <b>ρ<sub>calc</sub>/cm<sup>3</sup></b>            | 1.327                                                         |
| <b>μ/mm<sup>-1</sup></b>                          | 0.190                                                         |
| <b>F(000)</b>                                     | 816.0                                                         |
| <b>Crystal size/mm<sup>3</sup></b>                | 0.098 × 0.076 × 0.043                                         |
| <b>Radiation</b>                                  | Mo Kα (λ = 0.71073)                                           |
| <b>2θ range for data collection/°</b>             | 3.906 to 50                                                   |
| <b>Index ranges</b>                               | -11 ≤ h ≤ 11, -24 ≤ k ≤ 24, -12 ≤ l ≤ 11                      |
| <b>Reflections collected</b>                      | 31561                                                         |
| <b>Independent reflections</b>                    | 3436 [R <sub>int</sub> = 0.1468, R <sub>sigma</sub> = 0.0633] |
| <b>Data/restraints/parameters</b>                 | 3436/0/254                                                    |
| <b>Goodness-of-fit on F<sup>2</sup></b>           | 1.052                                                         |
| <b>Final R indexes [I ≥ 2σ (I)]</b>               | R <sub>1</sub> = 0.0572, wR <sub>2</sub> = 0.1474             |
| <b>Final R indexes [all data]</b>                 | R <sub>1</sub> = 0.0731, wR <sub>2</sub> = 0.1657             |
| <b>Largest diff. peak/hole / e Å<sup>-3</sup></b> | 0.23/-0.46                                                    |

(c) **X-ray Crystallography data for the compound of 42** Crystal of the compound **42** was obtained after slow evaporation of chloroform solvent. Molecular structure of **42** with 50% ellipsoid probability.





|                                                                           |                                                               |
|---------------------------------------------------------------------------|---------------------------------------------------------------|
| $\rho_{\text{calc}}/\text{cm}^3$                                          | 1.193                                                         |
| $\mu/\text{mm}^{-1}$                                                      | 0.074                                                         |
| <b>F(000)</b>                                                             | 640.0                                                         |
| <b>Crystal size/mm<sup>3</sup></b>                                        | 0.078 × 0.067 × 0.054                                         |
| <b>Radiation</b>                                                          | Mo K $\alpha$ ( $\lambda = 0.71073$ )                         |
| <b>2<math>\theta</math> range for data collection/<math>^\circ</math></b> | 4.14 to 49.992                                                |
| <b>Index ranges</b>                                                       | $-9 \leq h \leq 9, -23 \leq k \leq 23, -12 \leq l \leq 12$    |
| <b>Reflections collected</b>                                              | 49288                                                         |
| <b>Independent reflections</b>                                            | 2959 [ $R_{\text{int}} = 0.1552, R_{\text{sigma}} = 0.0527$ ] |
| <b>Data/restraints/parameters</b>                                         | 2959/0/208                                                    |
| <b>Goodness-of-fit on <math>F^2</math></b>                                | 1.054                                                         |
| <b>Final R indexes [<math>I \geq 2\sigma(I)</math>]</b>                   | $R_1 = 0.0689, wR_2 = 0.1823$                                 |
| <b>Final R indexes [all data]</b>                                         | $R_1 = 0.1037, wR_2 = 0.2143$                                 |
| <b>Largest diff. peak/hole / e <math>\text{\AA}^{-3}</math></b>           | 0.22/-0.34                                                    |

## 9. Spectroscopic data of the new starting materials

41b

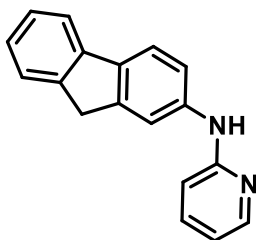

*N*-(9H-fluoren-2-yl)pyridin-2-amine

$^1\text{H NMR}$  (400 MHz,  $\text{CDCl}_3$ )  $\delta$  8.22 (d,  $J = 5.9$  Hz, 1H), 7.73 (d,  $J = 8.0$  Hz, 2H), 7.59 (s, 1H), 7.55 – 7.44 (m, 2H), 7.36 (t,  $J = 7.0$  Hz, 1H), 7.31 – 7.25 (m, 2H), 6.90 (d,  $J = 8.4$  Hz, 1H), 6.83 (s, 1H), 6.75 (dd,  $J = 7.2, 5.0$  Hz, 1H), 3.90 (s, 2H).

$^{13}\text{C NMR}$  (101 MHz,  $\text{CDCl}_3$ )  $\delta$  148.3, 144.8, 143.1, 141.7, 138.0, 138.0, 126.9, 126.2, 125.1, 120.6, 119.7, 119.7, 119.4, 117.4, 117.4, 115.0, 108.6, 37.1.

**HRMS (ESI-TOF)  $m/z$ :**  $[\text{M} + \text{H}]^+$  Calcd. for  $\text{C}_{18}\text{H}_{15}\text{N}_2$  259.1230; Found 259.1237

41c

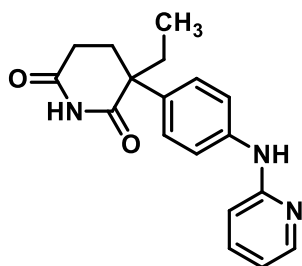

***(E)*-3-ethyl-3-(1-(pyridin-2-yl)-2-styryl-1H-indol-5-yl)piperidine-2,6-dione**

**<sup>1</sup>H NMR (400 MHz, CDCl<sub>3</sub>)** δ 9.39 (s, 1H), 8.27 (s, 1H), 7.50 (t, *J* = 8.0 Hz, 1H), 7.39 – 7.17 (m, 5H), 7.00 – 6.71 (m, 2H), 2.65 – 2.42 (m, 2H), 2.38 – 2.17 (m, 2H), 2.12 – 1.90 (m, 2H), 0.88 (t, *J* = 7.4 Hz, 3H).

**<sup>13</sup>C NMR (126 MHz, CDCl<sub>3</sub>)** δ 176.0, 173.2, 155.7, 148.2, 140.1, 138.1, 132.5, 127.3, 120.1, 115.4, 108.7, 50.6, 33.0, 29.5, 27.2, 9.2.

**HRMS (ESI-TOF) m/z:** [M + H]<sup>+</sup> Calcd. for C<sub>18</sub>H<sub>20</sub>N<sub>3</sub>O<sub>2</sub> 310.1550; Found 310.1547

## 10. <sup>1</sup>H and <sup>13</sup>C spectral data of the compounds

***4-methyl-N-(2-(4-oxo-4-phenylbutanoyl)phenyl) benzenesulfonamide***

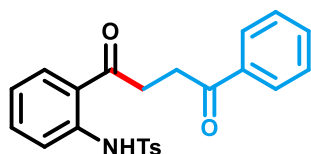

**3**, 78%

Purified by (petroleum ether/EtOAc: 80/20), 64 mg, white sticky solid.

**<sup>1</sup>H NMR (500 MHz, CDCl<sub>3</sub>)** δ 11.32 (s, 1H), 8.03 (d, *J* = 7.3 Hz, 2H), 7.97 (d, *J* = 8.1 Hz, 1H), 7.71 (d, *J* = 8.4 Hz, 2H), 7.67 (d, *J* = 8.4 Hz, 1H), 7.61 (t, *J* = 7.4 Hz, 1H), 7.51 (t, *J* = 7.8 Hz, 2H), 7.45 (t, *J* = 7.2 Hz, 1H), 7.22 (d, *J* = 8.2 Hz, 2H), 7.09 (t, *J* = 7.7 Hz, 1H), 3.39 (s, 4H), 2.35 (s, 3H).

**<sup>13</sup>C NMR (126 MHz, CDCl<sub>3</sub>)** δ 202.7, 198.4, 144.0, 140.1, 136.8, 136.7, 134.9, 133.5, 131.2, 129.8, 128.8, 128.2, 127.4, 122.8, 122.4, 119.4, 33.6, 32.5, 21.7

**HRMS (ESI-TOF) m/z:** [M + H]<sup>+</sup> calcd for C<sub>23</sub>H<sub>22</sub>NO<sub>4</sub>S 408.1264, found 408.1271.

***4-methyl-N-(2-(4-oxo-4-(p-tolyl) butanoyl)phenyl) benzenesulfonamide***

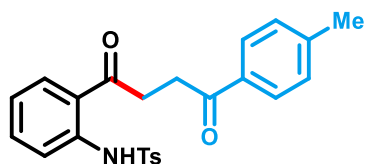

4, 80%

Purified by (petroleum ether/EtOAc: 95/5), 67 mg, white sticky solid.

**<sup>1</sup>H NMR (400 MHz, CDCl<sub>3</sub>)** δ 11.32 (s, 1H), 7.97 (dd, *J* = 8.1, 1.6 Hz, 1H), 7.93 (d, *J* = 8.3 Hz, 2H), 7.70 (d, *J* = 8.4 Hz, 2H), 7.67 (dd, *J* = 8.4, 1.2 Hz, 1H), 7.45 (ddd, *J* = 8.6, 7.3, 1.6 Hz, 1H), 7.30 (d, *J* = 8.0 Hz, 2H), 7.22 (d, *J* = 8.0 Hz, 2H), 7.13 – 7.04 (m, 1H), 3.40 – 3.34 (m, 4H), 2.44 (s, 3H), 2.36 (s, 3H).

**<sup>13</sup>C NMR (101 MHz, CDCl<sub>3</sub>)** δ 202.7, 197.8, 144.2, 143.8, 140.0, 136.6, 134.7, 134.1, 131.0, 129.6, 129.4, 128.2, 127.3, 122.7, 122.4, 119.3, 33.5, 32.3, 21.7, 21.5.

**HRMS (ESI-TOF)** *m/z*: [M + H]<sup>+</sup> calcd for C<sub>24</sub>H<sub>24</sub>NO<sub>4</sub>S 422.1421, found 422.1428.

*N*-(2-(4-(2,4-dimethylphenyl)-4-oxobutanoyl)phenyl)-4-methylbenzenesulfonamide

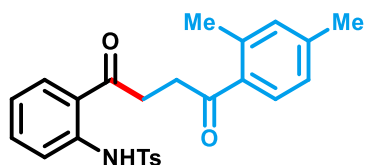

5, 82%

Purified by (petroleum ether/EtOAc: 80/20), 71 mg, light sticky liquid.

**<sup>1</sup>H NMR (400 MHz, CDCl<sub>3</sub>)** δ 11.36 (s, 1H), 7.96 (dd, *J* = 8.0, 1.6 Hz, 1H), 7.76 (d, *J* = 7.8 Hz, 1H), 7.71 (d, *J* = 8.5 Hz, 2H), 7.68 (dd, *J* = 8.5, 1.3 Hz, 1H), 7.44 (ddd, *J* = 8.5, 7.3, 1.6 Hz, 1H), 7.21 (d, *J* = 7.8 Hz, 2H), 7.13 (dd, *J* = 7.9, 2.1 Hz, 1H), 7.10 – 7.06 (m, 2H), 3.39 – 3.34 (m, 2H), 3.30 – 3.26 (m, 2H), 2.50 (s, 3H), 2.38 (s, 3H), 2.35 (s, 3H).

**<sup>13</sup>C NMR (101 MHz, CDCl<sub>3</sub>)** δ 202.7, 201.3, 143.8, 142.3, 139.9, 138.8, 136.5, 134.77, 134.46, 133.0, 131.0, 129.67, 129.23, 127.3, 126.5, 122.67, 122.27, 119.2, 34.71, 33.8, 21.6, 21.5, 21.4.

**HRMS (ESI-TOF)** *m/z*: [M + H]<sup>+</sup> calcd for C<sub>25</sub>H<sub>26</sub>NO<sub>4</sub>S 436.1577, found 436.1579.

*4*-methyl-*N*-(2-(4-oxo-4-(2-phenoxyphenyl)butanoyl)phenyl)benzenesulfonamide

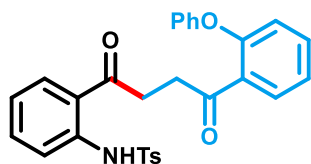

**6**, 84%

Purified by (petroleum ether/EtOAc: 80/20), 84 mg, white sticky solid.

**<sup>1</sup>H NMR (400 MHz, CDCl<sub>3</sub>)** δ 11.31 (s, 1H), 7.91 (dd, *J* = 8.0, 1.6 Hz, 1H), 7.87 (dd, *J* = 7.8, 1.9 Hz, 1H), 7.67 (m, 3H), 7.45 (d, *J* = 7.0 Hz, 1H), 7.41 (m, 3H), 7.22 – 7.17 (m, 4H), 7.08 (m, 3H), 6.94 (d, *J* = 8.2 Hz, 1H), 3.42 (t, *J* = 5.9 Hz, 2H), 3.31 (t, *J* = 5.9 Hz, 2H), 2.34 (s, 3H).

**<sup>13</sup>C NMR (101 MHz, CDCl<sub>3</sub>)** δ 202.6, 199.4, 156.5, 156.3, 143.8, 139.8, 136.5, 134.6, 133.8, 131.0, 130.65, 130.15, 129.84, 129.65, 127.3, 124.1, 123.5, 122.7, 122.5, 119.35, 119.25, 119.15, 37.3, 33.9, 21.5.

**HRMS (ESI-TOF)** *m/z*: [M + H]<sup>+</sup> calcd for C<sub>29</sub>H<sub>26</sub>NO<sub>5</sub>S 500.1526, found 500.1534.

***N*-(2-(4-(4-fluorophenyl)-4-oxobutanoyl)phenyl)-4-methylbenzenesulfonamide**

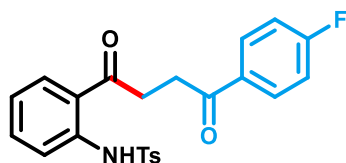

**7**, 72%

Purified by (petroleum ether/EtOAc: 80/20), 61 mg, white solid.

**<sup>1</sup>H NMR (400 MHz, CDCl<sub>3</sub>)** δ 11.32 (s, 1H), 8.05 (dd, *J* = 8.9, 5.3 Hz, 2H), 7.95 (dd, *J* = 8.1, 1.6 Hz, 1H), 7.70 (d, *J* = 6.4 Hz, 2H), 7.66 (d, *J* = 8.4 Hz, 1H), 7.47 – 7.42 (m, 1H), 7.22 (d, *J* = 8.4 Hz, 2H), 7.19 – 7.14 (m, 2H), 7.08 (td, *J* = 8.0, 1.3 Hz, 1H), 3.41 – 3.37 (m, 2H), 3.37 – 3.33 (m, 2H), 2.35 (s, 3H).

**<sup>13</sup>C NMR (101 MHz, CDCl<sub>3</sub>)** δ 202.5, 196.7, δ 165.9 (d, *J* = 254.7 Hz), 143.9, 140.0, 136.5, 134.9, 133.1 (d, *J* = 3.0 Hz), 131.1, 130.8 (d, *J* = 9.3 Hz), 129.7, 127.3, 122.69, 122.12, 119.1, 115.8 (d, *J* = 22.0 Hz), 33.5, 32.2, 21.5.

**HRMS (ESI-TOF)** *m/z*: [M + H]<sup>+</sup> calcd for C<sub>23</sub>H<sub>21</sub>FNO<sub>4</sub>S 426.1170, found 426.1173.

***4*-methyl-*N*-(2-(4-oxo-4-(thiophen-2-yl)butanoyl)phenyl)benzenesulfonamide**

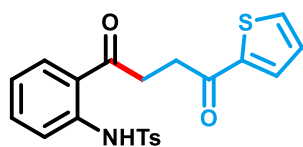

**8**, 75%

Purified by (petroleum ether/EtOAc: 80/20), 62 mg, light yellow liquid.

**<sup>1</sup>H NMR (400 MHz, CDCl<sub>3</sub>)** δ 11.31 (s, 1H), 7.94 (dd, *J* = 8.0, 1.6 Hz, 1H), 7.84 (dd, *J* = 3.8, 1.3 Hz, 1H), 7.72 – 7.65 (m, 4H), 7.45 (td, *J* = 8.0, 1.6 Hz, 1H), 7.23 (d, *J* = 11.2 Hz, 2H), 7.19 (dd, *J* = 5.0, 3.6 Hz, 1H), 7.11 – 7.06 (m, 1H), 3.38 (t, *J* = 5.8 Hz, 2H), 3.33 (t, *J* = 5.8 Hz, 2H), 2.36 (s, 3H).

**<sup>13</sup>C NMR (101 MHz, CDCl<sub>3</sub>)** δ 202.3, 191.1, 143.90, 143.63, 140.0, 136.5, 134.9, 133.8, 132.2, 131.0, 129.7, 128.3, 127.3, 122.71, 122.15, 119.2, 33.5, 32.9, 21.6

**HRMS (ESI-TOF)** *m/z*: [M + H]<sup>+</sup> calcd for C<sub>21</sub>H<sub>20</sub>NO<sub>4</sub>S<sub>2</sub> 414.0828, found 414.0837

***4-methyl-N-(2-(4-oxo-5-(*p*-tolyl)pentanoyl)phenyl)benzenesulfonamide***

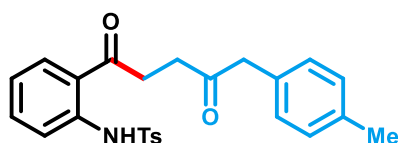

**9**, 75%

Purified by (petroleum ether/EtOAc: 80/20), 65 mg, sticky solid.

**<sup>1</sup>H NMR (400 MHz, CDCl<sub>3</sub>)** δ 11.31 (s, 1H), 7.84 (dd, *J* = 8.1, 1.6 Hz, 1H), 7.68 (d, *J* = 8.4 Hz, 2H), 7.64 (d, *J* = 8.4 Hz, 1H), 7.42 (t, *J* = 7.9 Hz, 1H), 7.22 – 7.15 (m, 6H), 7.04 (t, *J* = 7.6 Hz, 1H), 3.78 (s, 2H), 3.17 (t, *J* = 6.1 Hz, 2H), 2.80 (t, *J* = 6.1 Hz, 2H), 2.35 (s, 3H), 2.34 (s, 3H).

**<sup>13</sup>C NMR (101 MHz, CDCl<sub>3</sub>)** δ 207.1, 202.4, 143.9, 139.9, 136.8, 136.5, 134.8, 131.1, 131.0, 129.7, 129.5, 129.4, 127.3, 122.62, 122.06, 119.1, 49.9, 35.3, 33.5, 21.5, 21.1

**HRMS (ESI-TOF)** *m/z*: [M + H]<sup>+</sup> calcd for C<sub>25</sub>H<sub>26</sub>NO<sub>4</sub>S 436.1577 found 436.1583

***N-(2-(5-(4-(*tert*-butyl)phenyl)-4-oxopentanoyl)phenyl)-4-methylbenzenesulfonamide***

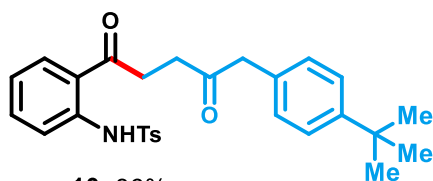

**10**, 86%

Purified by (petroleum ether/EtOAc: 80/20), 82 mg, light yellow liquid.

**<sup>1</sup>H NMR (400 MHz, CDCl<sub>3</sub>)** δ 11.31 (s, 1H), 7.84 (dd, *J* = 8.1, 1.6 Hz, 1H), 7.68 (d, *J* = 8.4 Hz, 2H), 7.65 (dd, *J* = 8.4, 1.3 Hz, 1H), 7.43 (dd, *J* = 7.3, 1.5 Hz, 1H), 7.39 (d, *J* = 8.4 Hz, 2H), 7.22 – 7.16 (m, 4H), 7.04 (t, *J* = 7.1 Hz, 1H), 3.80 (s, 2H), 3.18 (t, *J* = 6.2 Hz, 2H), 2.83 (t, *J* = 6.1 Hz, 2H), 2.33 (s, 3H), 1.32 (s, 9H).

**<sup>13</sup>C NMR (101 MHz, CDCl<sub>3</sub>)** δ 207.1, 202.4, 150.0, 143.9, 139.9, 136.4, 134.8, 131.1, 131.0, 129.68, 129.21, 127.3, 125.7, 122.7, 122.1, 119.2, 49.7, 35.4, 34.5, 33.5, 31.4, 21.5

**HRMS (ESI-TOF) m/z:**  $[M + Na]^+$  calcd for  $C_{28}H_{31}NNaO_4S$  500.1866 found 500.1876

***4-methyl-N-(2-(4-oxo-5-(4-(trifluoromethyl)phenyl)pentanoyl)phenyl)benzenesulfonamide***

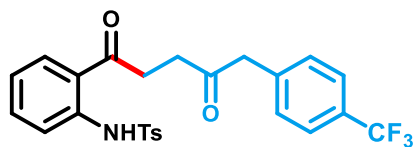

11, 76%

Purified by (petroleum ether/EtOAc: 70/30), 74 mg, sticky solid.

**$^1H$  NMR (500 MHz,  $CDCl_3$ )**  $\delta$  11.33 (s, 1H), 7.88 (d,  $J = 8.1$  Hz, 1H), 7.72 (d,  $J = 8.4$  Hz, 2H), 7.67 (d,  $J = 8.4$  Hz, 1H), 7.46 (dt,  $J = 8.5, 4.4$  Hz, 2H), 7.38 (d,  $J = 2.3$  Hz, 1H), 7.23 (d,  $J = 8.2$  Hz, 2H), 7.17 – 7.09 (m, 2H), 7.06 (d,  $J = 7.6$  Hz, 1H), 3.86 (s, 2H), 3.30 – 3.24 (m, 2H), 2.85 (t,  $J = 6.0$  Hz, 2H), 2.37 (s, 3H).

**$^{13}C$  NMR (126 MHz,  $CDCl_3$ )**  $\delta$  205.5, 202.2, 144.0, 140.0, 136.5, 135.0, 134.1, 131.6, 131.0, 130.6, 129.7, 129.1, 127.3, 122.6, 121.7, 119.0, 48.8, 35.7, 33.6, 21.5.

Coupling carbons corresponding  $CF_3$  groups could not be identified.  **$^{19}F$  NMR** was done to confirm presence of  $CF_3$  groups.

**HRMS (ESI-TOF) m/z:**  $[M + H]^+$  calcd for  $C_{25}H_{23}F_3NO_4S$  490.1294, found 490.1295

**$^{19}F$  NMR (377 MHz,  $CDCl_3$ )**  $\delta$  -62.51

***N-(2-(5-(4-fluorophenyl)-4-oxopentanoyl)phenyl)-4-methylbenzenesulfonamide***

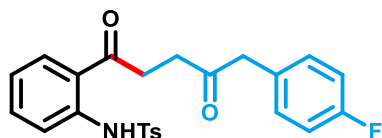

12, 78%

Purified by (petroleum ether/EtOAc: 80/20), 69 mg, sticky solid.

**$^1H$  NMR (400 MHz,  $CDCl_3$ )**  $\delta$  11.32 (s, 1H), 7.85 (dd,  $J = 8.1, 1.6$  Hz, 1H), 7.69 (d,  $J = 8.4$  Hz, 2H), 7.63 (dd,  $J = 8.5, 1.2$  Hz, 1H), 7.42 (m, 1H), 7.23 (d,  $J = 5.4$  Hz, 1H), 7.22 – 7.17 (m, 3H), 7.08 – 7.02 (m, 3H), 3.82 (s, 2H), 3.24 – 3.19 (m, 2H), 2.84 – 2.79 (m, 2H), 2.34 (s, 3H).

**$^{13}C$  NMR (101 MHz,  $CDCl_3$ )**  $\delta$  206.7, 202.4, 162.1 (d,  $J = 245.4$  Hz), 144.0, 140.1, 136.5, 135.0, 131.2 (d,  $J = 8.1$  Hz), 131.1, 129.9 (d,  $J = 3.4$  Hz), 129.8, 127.4, 122.7, 121.98, 119.1, 115.7 (d,  $J = 21.6$  Hz), 49.2, 35.6, 33.7, 21.6

**HRMS (ESI-TOF) m/z:**  $[M + Na]^+$  calcd for  $C_{24}H_{22}FNNaO_4S$  462.1146, found 462.1150

***4-methyl-N-(2-(4-oxo-5-(o-tolyl)pentanoyl)phenyl)benzenesulfonamide***

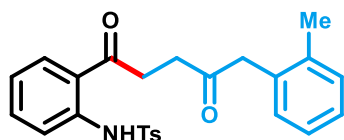

**13**, 72%

Purified by (petroleum ether/EtOAc: 80/20), 63 mg, sticky solid.

**<sup>1</sup>H NMR (400 MHz, CDCl<sub>3</sub>)** δ 11.31 (s, 1H), 7.85 (dd, *J* = 8.0, 1.6 Hz, 1H), 7.67 (d, *J* = 8.5 Hz, 2H), 7.65 (dd, *J* = 8.5, 1.3 Hz, 1H), 7.45 – 7.40 (m, 1H), 7.23 – 7.19 (m, 4H), 7.17 (d, *J* = 7.8 Hz, 2H), 7.04 (t, *J* = 7.1 Hz, 1H), 3.85 (s, 2H), 3.22 – 3.17 (m, 2H), 2.81 – 2.76 (m, 2H), 2.33 (s, 3H), 2.30 (s, 3H).

**<sup>13</sup>C NMR (101 MHz, CDCl<sub>3</sub>)** δ 206.8, 202.4, 143.9, 139.9, 137.0, 136.4, 134.8, 133.0, 130.94, 130.5, 130.5, 129.7, 127.48, 127.27, 126.3, 122.62, 122.04, 119.1, 48.4, 35.4, 33.5, 21.5, 19.7

**HRMS (ESI-TOF)** *m/z*: [M + H]<sup>+</sup> calcd for C<sub>25</sub>H<sub>26</sub>NO<sub>4</sub>S 436.1577, found 436.1583

*N*-(2-(5-(2-chlorophenyl)-4-oxopentanoyl)phenyl)-4-methylbenzenesulfonamide

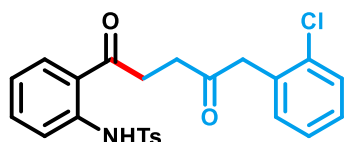

**14**, 75%

Purified by (petroleum ether/EtOAc: 80/20), 68 mg, sticky solid.

**<sup>1</sup>H NMR (400 MHz, CDCl<sub>3</sub>)** δ 11.30 (s, 1H), 7.84 (dd, *J* = 8.0, 1.6 Hz, 1H), 7.66 (dd, *J* = 10.7, 8.3 Hz, 3H), 7.41 (t, *J* = 8.3 Hz, 2H), 7.31 – 7.26 (m, 2H), 7.25 – 7.22 (m, 1H), 7.17 (d, *J* = 8.3 Hz, 2H), 7.04 (t, *J* = 7.7 Hz, 1H), 3.98 (s, 2H), 3.21 (t, *J* = 6.1 Hz, 2H), 2.86 (t, *J* = 6.1 Hz, 2H), 2.32 (s, 3H).

**<sup>13</sup>C NMR (101 MHz, CDCl<sub>3</sub>)** δ 205.4, 202.3, 143.9, 139.9, 136.4, 134.81, 134.48, 132.8, 131.9, 130.9, 129.67, 129.57, 128.8, 127.31, 127.11, 122.67, 122.09, 119.2, 47.7, 35.8, 33.5, 21.5.

**HRMS (ESI-TOF)** *m/z*: [M + H]<sup>+</sup> calcd for C<sub>24</sub>H<sub>23</sub>ClNO<sub>4</sub>S 456.1031, found 456.1037.

*N*-(2-(5-mesityl-4-oxopentanoyl)phenyl)-4-methylbenzenesulfonamide

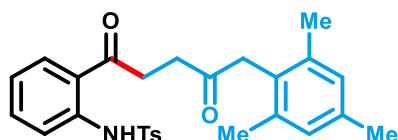

**15**, 85%

Purified by (petroleum ether/EtOAc: 80/20), 79 mg, white solid.



**<sup>1</sup>H NMR (400 MHz, CDCl<sub>3</sub>)** δ 11.31 (s, 1H), 7.85 (dd, *J* = 8.1, 1.5 Hz, 1H), 7.68 – 7.64 (m, 3H), 7.45 – 7.40 (m, 1H), 7.15 (d, *J* = 8.0 Hz, 2H), 7.08 – 7.02 (m, 1H), 6.90 (s, 2H), 3.86 (s, 2H), 3.22 – 3.18 (m, 2H), 2.79 – 2.75 (m, 2H), 2.33 (s, 3H), 2.28 (s, 3H), 2.27 (s, 6H).

**<sup>13</sup>C NMR (101 MHz, CDCl<sub>3</sub>)** δ 207.0, 202.5, 143.9, 139.9, 136.91, 136.54, 136.42, 134.8, 131.0, 129.73, 129.06, 127.3, 122.70, 122.12, 119.2, 44.1, 35.4, 33.5, 21.5, 21.9, 20.4

**HRMS (ESI-TOF)** *m/z*: [M + H]<sup>+</sup> calcd for C<sub>27</sub>H<sub>30</sub>NO<sub>4</sub>S 464.1890, found 464.1897

*N*-(2-(5-(3,4-dichlorophenyl)-4-oxopentanoyl)phenyl)-4-methylbenzenesulfonamide

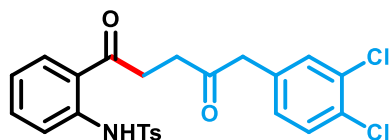

16, 73%

Purified by (petroleum ether/EtOAc: 80/20), 72 mg, sticky solid.

**<sup>1</sup>H NMR (400 MHz, CDCl<sub>3</sub>)** δ 11.35 (s, 1H), 7.87 (dd, *J* = 8.0, 1.6 Hz, 1H), 7.73 – 7.68 (m, 2H), 7.67 – 7.63 (m, 3H), 7.40 (d, *J* = 8.3 Hz, 2H), 7.20 (d, *J* = 8.6 Hz, 2H), 7.06 (ddd, *J* = 8.3, 7.4, 1.2 Hz, 1H), 3.96 (s, 2H), 3.29 – 3.22 (m, 2H), 2.90 – 2.85 (m, 2H), 2.35 (s, 3H).

**<sup>13</sup>C NMR (101 MHz, CDCl<sub>3</sub>)** δ 205.8, 202.3, 144.0, 140.0, 138.1, 136.4, 135.0, 131.0, 130.05, 129.7, 127.32, 127.26, 125.6, 125.6, 122.6, 121.8, 118.9, 49.6, 35.8, 33.6, 21.5.

**HRMS (ESI-TOF)** *m/z*: [M + H]<sup>+</sup> calcd for C<sub>24</sub>H<sub>22</sub>Cl<sub>2</sub>NO<sub>4</sub>S 490.0641, found 490.0645.

*N*-(2-(5-(2,4-dichlorophenyl)-4-oxopentanoyl)phenyl)-4-methylbenzenesulfonamide

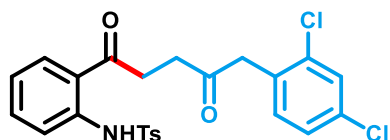

17, 70%

Purified by (petroleum ether/EtOAc: 80/20), 69 mg, sticky solid

**<sup>1</sup>H NMR (400 MHz, CDCl<sub>3</sub>)** δ 11.34 (s, 1H), 7.88 (dd, *J* = 8.0, 1.6 Hz, 1H), 7.71 (d, *J* = 8.4 Hz, 2H), 7.67 (dd, *J* = 8.4, 1.3 Hz, 1H), 7.47 – 7.43 (m, 2H), 7.29 – 7.26 (m, 2H), 7.21 (d, *J* = 7.8 Hz, 2H), 7.09 – 7.05 (m, 1H), 3.99 (s, 2H), 3.30 – 3.25 (m, 2H), 2.92 – 2.87 (m, 2H), 2.36 (s, 3H).

**<sup>13</sup>C NMR (101 MHz, CDCl<sub>3</sub>)** δ 204.9, 202.2, 143.9, 140.0, 136.4, 135.2, 134.9, 133.8, 132.66, 131.3, 131.0, 129.70, 129.38, 127.38, 127.28, 122.6, 121.9, 119.0, 47.0, 35.8, 33.5, 21.5

**HRMS (ESI-TOF)** *m/z*: [M + H]<sup>+</sup> calcd for C<sub>24</sub>H<sub>22</sub>Cl<sub>2</sub>NO<sub>4</sub>S 490.0641 found 490.0651

*4*-methyl-*N*-(2-(4-oxo-5-phenylheptanoyl)phenyl)benzenesulfonamide

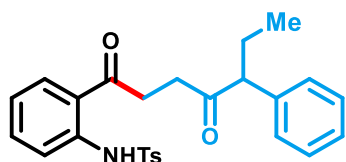

**18**, 78%

Purified by (petroleum ether/EtOAc: 80/20), 70 mg, light yellow liquid.

**<sup>1</sup>H NMR (400 MHz, CDCl<sub>3</sub>)** δ 11.28 (s, 1H), 7.81 (dd, *J* = 8.0, 1.6 Hz, 1H), 7.67 (d, *J* = 8.4 Hz, 2H), 7.64 (dd, *J* = 8.5, 1.2 Hz, 1H), 7.44 – 7.39 (m, 1H), 7.38 – 7.33 (m, 2H), 7.31 – 7.28 (m, 1H), 7.24 (d, *J* = 1.5 Hz, 1H), 7.19 (d, *J* = 8.0 Hz, 2H), 7.03 (td, *J* = 7.8, 1.2 Hz, 1H), 3.67 (t, *J* = 7.5 Hz, 1H), 3.28 – 3.18 (m, 1H), 3.03 – 2.94 (m, 1H), 2.85 – 2.75 (m, 1H), 2.66 (dt, *J* = 16.9, 5.3 Hz, 1H), 2.34 (s, 3H), 2.18 – 2.09 (m, 1H), 1.80 – 1.72 (m, 1H), 0.87 (t, *J* = 7.3 Hz, 3H).

**<sup>13</sup>C NMR (101 MHz, CDCl<sub>3</sub>)** δ 209.1, 202.5, 143.9, 139.8, 138.9, 136.4, 134.7, 130.9, 129.66, 128.9, 128.4, 127.34, 127.27, 122.69, 122.18, 119.2, 60.9, 35.4, 33.5, 25.2, 21.5, 12.1

**HRMS (ESI-TOF)** *m/z*: [M + H]<sup>+</sup> calcd for C<sub>26</sub>H<sub>28</sub>NO<sub>4</sub>S 450.1734 found 457.1737

***4-methyl-N-(2-(4-oxo-7-phenylheptanoyl)phenyl)benzenesulfonamide***

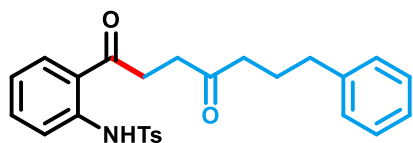

**19**, 80%

Purified by (petroleum ether/EtOAc: 80/20), 72 mg, light yellow liquid.

**<sup>1</sup>H NMR (400 MHz, CDCl<sub>3</sub>)** δ 11.34 (s, 1H), 7.88 (dd, *J* = 8.1, 1.6 Hz, 1H), 7.70 (d, *J* = 8.4 Hz, 2H), 7.65 (dd, *J* = 8.4, 1.2 Hz, 1H), 7.46 – 7.40 (m, 1H), 7.34 – 7.28 (m, 2H), 7.21 (d, *J* = 7.5 Hz, 5H), 7.08 – 7.02 (m, 1H), 3.21 (t, *J* = 6.1 Hz, 2H), 2.75 (t, *J* = 6.1 Hz, 2H), 2.67 (t, *J* = 7.6 Hz, 2H), 2.56 (t, *J* = 7.4 Hz, 2H), 2.35 (s, 3H), 2.01 – 1.93 (m, 2H).

**<sup>13</sup>C NMR (101 MHz, CDCl<sub>3</sub>)** δ 208.9, 202.5, 143.9, 141.6, 140.0, 136.6, 134.8, 131.0, 129.7, 128.5, 128.4, 127.3, 126.0, 122.60, 122.04, 119.1, 42.0, 36.0, 35.1, 33.4, 25.3, 21.5

**HRMS (ESI-TOF)** *m/z*: [M + H]<sup>+</sup> calcd for C<sub>26</sub>H<sub>28</sub>NO<sub>4</sub>S 450.1734, found 450.1739.

***N-(2-adamantan-1-yl)-4-oxobutanoyl)phenyl)-4-methylbenzenesulfonamide***

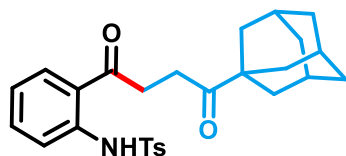

**20**, 80%

Purified by (petroleum ether/EtOAc: 80/20), 74 mg, light yellow liquid.

**<sup>1</sup>H NMR (500 MHz, CDCl<sub>3</sub>)** δ 11.37 (s, 1H), 7.92 (dd, *J* = 8.1, 1.7 Hz, 1H), 7.71 (d, *J* = 8.4 Hz, 2H), 7.66 (d, *J* = 8.4 Hz, 1H), 7.46 – 7.41 (m, 1H), 7.25 (d, *J* = 8.4 Hz, 2H), 7.07 (t, *J* = 7.6 Hz, 1H), 3.18 (t, *J* = 6.2 Hz, 2H), 2.87 (t, *J* = 6.1 Hz, 2H), 2.38 (s, 3H), 2.13 – 2.08 (m, 3H), 1.91 (d, *J* = 3.2 Hz, 6H), 1.85 – 1.68 (m, 6H).

**<sup>13</sup>C NMR (126 MHz, CDCl<sub>3</sub>)** δ 214.0, 202.9, 143.8, 139.8, 136.5, 134.6, 131.0, 129.7, 127.3, 122.7, 122.4, 119.1, 46.3, 38.4, 36.6, 33.2, 30.2, 28.0, 21.5

**HRMS (ESI-TOF)** *m/z*: [M + H]<sup>+</sup> calcd for C<sub>27</sub>H<sub>32</sub>NO<sub>4</sub>S 466.2047, found 466.2048

**4-methyl-N-(4-methyl-2-(4-oxo-4-phenylbutanoyl)phenyl)benzenesulfonamide**

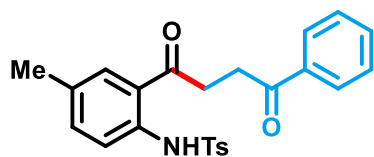

**21**, 75%

Purified by (petroleum ether/EtOAc: 80/20), 63 mg, sticky solid.

**<sup>1</sup>H NMR (500 MHz, CDCl<sub>3</sub>)** δ 11.10 (s, 1H), 8.06 (d, *J* = 7.2 Hz, 2H), 7.76 (d, *J* = 2.1 Hz, 1H), 7.69 (d, *J* = 8.4 Hz, 2H), 7.62 (t, *J* = 7.6 Hz, 2H), 7.54 (t, *J* = 7.7 Hz, 2H), 7.32 – 7.29 (m, 1H), 7.23 (d, *J* = 8.2 Hz, 2H), 3.38 (m, 4H), 2.37 (s, 3H), 2.34 (s, 3H).

**<sup>13</sup>C NMR (126 MHz, CDCl<sub>3</sub>)** δ 202.5, 198.3, 143.7, 137.3, 136.6, 136.5, 135.5, 133.4, 132.5, 131.1, 129.6, 128.71, 128.11, 127.3, 122.7, 119.8, 33.5, 32.4, 21.5, 20.7.

**HRMS (ESI-TOF)** *m/z*: [M + H]<sup>+</sup> calcd for C<sub>24</sub>H<sub>24</sub>NO<sub>4</sub>S 422.1421, found 422.1426

**N-(4,5-dimethoxy-2-(4-oxo-4-phenylbutanoyl)phenyl)-4-methylbenzenesulfonamide**

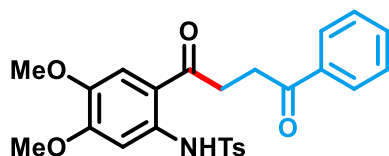

**22**, 72%

Purified by (petroleum ether/EtOAc: 50/50), 67 mg, white solid.

**<sup>1</sup>H NMR (500 MHz, CDCl<sub>3</sub>)** δ 11.45 (s, 1H), 8.06 (dd, *J* = 8.4, 1.4 Hz, 2H), 7.67 (d, *J* = 8.4 Hz, 2H), 7.63 (d, *J* = 7.3 Hz, 1H), 7.54 (t, *J* = 7.7 Hz, 2H), 7.32 (d, *J* = 9.8 Hz, 2H), 7.23 (d, *J* = 8.2 Hz, 2H), 3.95 (s, 3H), 3.90 (s, 3H), 3.39 (t, *J* = 6.6 Hz, 2H), 3.33 (t, *J* = 6.6 Hz, 2H), 2.38 (s, 3H).

**<sup>13</sup>C NMR (126 MHz, CDCl<sub>3</sub>)** δ 200.6, 198.5, 154.3, 144.4, 143.8, 136.6, 136.3, 136.1, 133.4, 129.6, 128.7, 128.1, 127.3, 115.3, 112.4, 103.0, 56.3, 56.2, 33.3, 32.4, 21.6

**HRMS (ESI-TOF)** *m/z*: [M + H]<sup>+</sup> calcd for C<sub>25</sub>H<sub>26</sub>NO<sub>6</sub>S 468.1475, found 468.1479

**4-methyl-N-(2-(4-oxo-4-phenylbutanoyl)-5-(trifluoromethyl)phenyl)benzenesulfonamide**

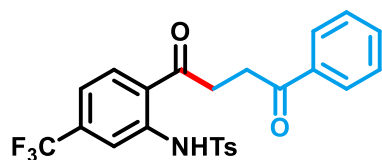

**23**, 82%

Purified by (petroleum ether/EtOAc: 70/30), 78 mg, sticky solid.

**<sup>1</sup>H NMR (400 MHz, CDCl<sub>3</sub>)** δ 11.31 (s, 1H), 8.11 (d, *J* = 8.0 Hz, 1H), 8.07 – 8.02 (m, 2H), 8.00 (d, *J* = 2.2 Hz, 1H), 7.75 (d, *J* = 8.4 Hz, 2H), 7.65 – 7.61 (m, 1H), 7.53 (t, *J* = 7.6 Hz, 2H), 7.34 (dd, *J* = 8.4, 1.9 Hz, 1H), 7.27 (d, *J* = 8.7 Hz, 2H), 3.47 – 3.39 (m, 4H), 2.39 (s, 3H).

**<sup>13</sup>C NMR (101 MHz, CDCl<sub>3</sub>)** δ 202.3, 198.1, 144.5, 140.4, 136.5, 136.0, 135.8 (q, *J* = 33.4 Hz), 133.6, 131.7, 130.0, 128.8, 128.2, 127.5, 125.8 (q, *J* = 272.5 Hz), 124.2, 119.1 (q, *J* = 3.5 Hz), 116.0 (q, *J* = 3.9 Hz), 33.9, 32.5, 21.7

**HRMS (ESI-TOF)** *m/z*: [M + H]<sup>+</sup> calcd for C<sub>24</sub>H<sub>21</sub>F<sub>3</sub>NO<sub>4</sub>S 476.1138, found 476.1144

*N*-(5-chloro-2-(4-oxo-4-phenylbutanoyl)phenyl)-4-methylbenzenesulfonamide

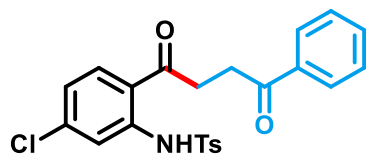

**24**, 80%

Purified by (petroleum ether/EtOAc: 80/20), 71 mg, sticky solid.

**<sup>1</sup>H NMR (400 MHz, CDCl<sub>3</sub>)** δ 11.47 (s, 1H), 8.03 (dd, *J* = 8.4, 1.4 Hz, 2H), 7.91 (d, *J* = 8.7 Hz, 1H), 7.77 – 7.69 (m, 3H), 7.62 (t, *J* = 7.4 Hz, 1H), 7.52 (t, *J* = 7.6 Hz, 2H), 7.27 (d, *J* = 8.2 Hz, 2H), 7.05 (dd, *J* = 8.7, 2.0 Hz, 1H), 3.44 – 3.34 (m, 4H), 2.39 (s, 3H).

**<sup>13</sup>C NMR (101 MHz, CDCl<sub>3</sub>)** δ 201.8, 198.1, 144.3, 141.2, 141.1, 136.5, 136.2, 133.4, 132.2, 129.8, 128.7, 128.1, 127.3, 122.82, 120.22, 118.7, 33.5, 32.4, 21.6

**HRMS (ESI-TOF)** *m/z*: [M + H]<sup>+</sup> calcd for C<sub>23</sub>H<sub>21</sub>ClNO<sub>4</sub>S 442.0874, found 442.0884

*N*-(5-bromo-2-(4-oxo-4-phenylbutanoyl)phenyl)-4-methylbenzenesulfonamide

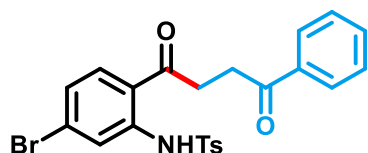

**25**, 76%

Purified by (petroleum ether/EtOAc: 80/20), 74 mg, white sticky solid.

**<sup>1</sup>H NMR (400 MHz, CDCl<sub>3</sub>)** δ 11.43 (s, 1H), 8.04 (dd, *J* = 8.4, 1.3 Hz, 2H), 7.89 (d, *J* = 1.8 Hz, 1H), 7.83 (d, *J* = 8.6 Hz, 1H), 7.74 (d, *J* = 8.4 Hz, 2H), 7.66 – 7.60 (m, 1H), 7.52 (t, *J* =

7.6 Hz, 2H), 7.28 (d,  $J = 7.9$  Hz, 2H), 7.23 (dd,  $J = 8.6, 2.0$  Hz, 1H), 3.45 – 3.33 (m, 4H), 2.40 (s, 3H).

$^{13}\text{C}$  NMR (101 MHz,  $\text{CDCl}_3$ )  $\delta$  202.0, 198.1, 144.3, 141.0, 136.48, 136.16, 133.4, 132.1, 129.85, 129.75, 128.74, 128.11, 127.3, 125.8, 121.8, 120.6, 33.5, 32.4, 21.6

HRMS (ESI-TOF)  $m/z$ :  $[\text{M} + \text{H}]^+$  calcd for  $\text{C}_{23}\text{H}_{21}\text{BrNO}_4\text{S}$  486.0369, found 486.0371

*N*-(4-iodo-2-(4-oxo-4-phenylbutanoyl)phenyl)-4-methylbenzenesulfonamide

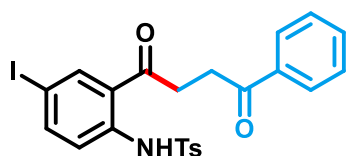

26, 74%

Purified by (petroleum ether/EtOAc: 80/20), 79 mg, sticky solid.

$^1\text{H}$  NMR (500 MHz,  $\text{CDCl}_3$ )  $\delta$  11.36 (s, 1H), 8.06 (d,  $J = 7.0$  Hz, 2H), 7.99 (dd,  $J = 8.0, 1.6$  Hz, 1H), 7.73 (d,  $J = 8.4$  Hz, 2H), 7.70 (d,  $J = 8.4$  Hz, 1H), 7.63 (t,  $J = 7.4$  Hz, 1H), 7.53 (t,  $J = 7.7$  Hz, 2H), 7.25 (d,  $J = 8.4$  Hz, 2H), 7.13 – 7.10 (m, 1H), 3.41 (s, 4H), 2.38 (s, 3H).

$^{13}\text{C}$  NMR (126 MHz,  $\text{CDCl}_3$ )  $\delta$  202.6, 198.3, 143.9, 139.9, 136.6, 136.5, 134.8, 133.4, 131.0, 129.7, 128.72, 128.12, 127.3, 122.72, 122.26, 119.2, 33.5, 32.4, 21.5

HRMS (ESI-TOF)  $m/z$ :  $[\text{M} + \text{H}]^+$  calcd for  $\text{C}_{23}\text{H}_{21}\text{INO}_4\text{S}$  534.0231, found 534.0233

4-chloro-*N*-(2-(4-oxo-4-phenylbutanoyl)phenyl)benzenesulfonamide

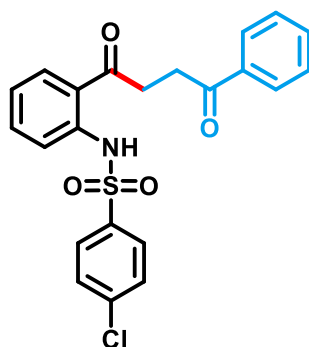

27, 78%

Purified by (petroleum ether/EtOAc: 80/20), 67 mg, sticky solid.

$^1\text{H}$  NMR (400 MHz,  $\text{CDCl}_3$ )  $\delta$  11.42 (s, 1H), 8.09 – 8.03 (m, 2H), 8.01 (dd,  $J = 8.0, 1.5$  Hz, 1H), 7.80 – 7.74 (m, 2H), 7.70 (d,  $J = 1.1$  Hz, 1H), 7.65 – 7.61 (m, 1H), 7.56 – 7.51 (m, 2H), 7.49 (d,  $J = 7.0$  Hz, 1H), 7.43 (d,  $J = 8.7$  Hz, 2H), 7.17 – 7.13 (m, 1H), 3.44 (s, 4H).

$^{13}\text{C}$  NMR (101 MHz,  $\text{CDCl}_3$ )  $\delta$  202.8, 198.1, 139.55, 139.52, 137.9, 136.5, 134.9, 133.4, 131.2, 129.4, 128.7, 128.1, 123.2, 122.4, 119.4, 33.5, 32.4

HRMS (ESI-TOF)  $m/z$ :  $[\text{M} + \text{H}]^+$  calcd for  $\text{C}_{22}\text{H}_{19}\text{ClNO}_4\text{S}$  428.0718, found 428.0721

4-methoxy-*N*-(2-(4-oxo-4-phenylbutanoyl)phenyl)benzenesulfonamide

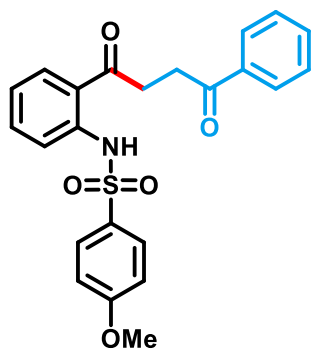

28, 76%

Purified by (petroleum ether/EtOAc: 60/40), 64 mg, sticky solid.

$^1\text{H NMR}$  (400 MHz,  $\text{CDCl}_3$ )  $\delta$  11.32 (s, 1H), 8.05 (dd,  $J = 8.5, 1.4$  Hz, 2H), 7.98 (dd,  $J = 8.0, 1.6$  Hz, 1H), 7.77 (d,  $J = 9.1$  Hz, 2H), 7.69 (dd,  $J = 8.5, 1.2$  Hz, 1H), 7.64 – 7.60 (m, 1H), 7.55 – 7.50 (m, 2H), 7.49 – 7.45 (m, 1H), 7.10 (ddd,  $J = 8.5, 7.3, 1.2$  Hz, 1H), 6.91 (d,  $J = 8.9$  Hz, 2H), 3.82 (s, 3H), 3.41 (s, 4H).

$^{13}\text{C NMR}$  (101 MHz,  $\text{CDCl}_3$ )  $\delta$  202.6, 198.3, 163.1, 140.0, 136.6, 134.8, 133.4, 131.1, 129.5, 128.72, 128.66, 128.11, 122.70, 122.25, 119.2, 114.2, 55.6, 33.5, 32.4

HRMS (ESI-TOF)  $m/z$ :  $[\text{M} + \text{H}]^+$  calcd for  $\text{C}_{23}\text{H}_{22}\text{NO}_5\text{S}$  424.1213, found 424.1220

*N*-(2-(5-(4-isobutylphenyl)-4-oxohexanoyl)phenyl)-4-methylbenzenesulfonamide

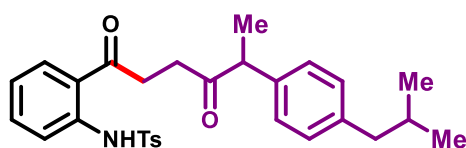

Ibuprofen  
29, 75%

Purified by (petroleum ether/EtOAc: 80/20), 74 mg, light yellow liquid.

$^1\text{H NMR}$  (500 MHz,  $\text{CDCl}_3$ )  $\delta$  11.32 (s, 1H), 7.85 (dd,  $J = 8.0, 1.6$  Hz, 1H), 7.71 (d,  $J = 8.4$  Hz, 2H), 7.66 (dd,  $J = 8.4, 1.2$  Hz, 1H), 7.44 (ddd,  $J = 8.7, 7.3, 1.6$  Hz, 1H), 7.23 (d,  $J = 8.4$  Hz, 2H), 7.21 – 7.16 (m, 4H), 7.08 – 7.04 (m, 1H), 3.90 (q,  $J = 6.9$  Hz, 1H), 3.26 (m, 1H), 3.03 (dt,  $J = 18.3, 5.9$  Hz, 1H), 2.81 (ddd,  $J = 18.3, 7.6, 5.4$  Hz, 1H), 2.68 (dt,  $J = 18.2, 6.0$  Hz, 1H), 2.49 (d,  $J = 7.2$  Hz, 2H), 2.37 (s, 3H), 1.89 (dt,  $J = 13.6, 6.9$  Hz, 1H), 1.47 (d,  $J = 7.0$  Hz, 3H), 0.94 (s, 3H), 0.93 (s, 3H).

$^{13}\text{C NMR}$  (126 MHz,  $\text{CDCl}_3$ )  $\delta$  209.7, 202.6, 143.9, 140.8, 139.9, 137.7, 136.4, 134.8, 130.9, 129.7, 129.7, 127.7, 127.3, 122.7, 122.2, 119.2, 52.7, 45.0, 34.6, 33.7, 30.2, 22.4, 21.6, 17.4

HRMS (ESI-TOF)  $m/z$ :  $[\text{M} + \text{H}]^+$  calcd for  $\text{C}_{29}\text{H}_{34}\text{NO}_4\text{S}$  492.2203, found 492.2220

*N*-(2-(8-(2,4-dimethylphenoxy)-5,5-dimethyl-4-oxooctanoyl)phenyl)-4-methylbenzenesulfonamide

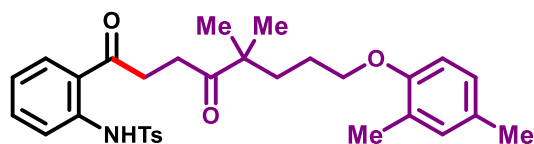

**Gemfibrozil**

**30**, 78%

Purified by (petroleum ether/EtOAc: 75/25), 83 mg, light yellow liquid.

**<sup>1</sup>H NMR (500 MHz, CDCl<sub>3</sub>)** δ 11.32 (s, 1H), 7.85 (dd, *J* = 8.0, 1.6 Hz, 1H), 7.71 (d, *J* = 8.4 Hz, 2H), 7.66 (dd, *J* = 8.4, 1.2 Hz, 1H), 7.44 (ddd, *J* = 8.7, 7.3, 1.6 Hz, 1H), 7.23 (d, *J* = 8.4 Hz, 2H), 7.21 – 7.16 (m, 4H), 7.08 – 7.04 (m, 1H), 3.90 (q, *J* = 6.9 Hz, 1H), 3.26 (ddd, *J* = 18.3, 7.7, 5.6 Hz, 1H), 3.03 (dt, *J* = 18.3, 5.9 Hz, 1H), 2.81 (ddd, *J* = 18.3, 7.6, 5.4 Hz, 1H), 2.68 (dt, *J* = 18.2, 6.0 Hz, 1H), 2.49 (d, *J* = 7.2 Hz, 2H), 2.37 (s, 3H), 1.89 (dt, *J* = 13.6, 6.9 Hz, 1H), 1.47 (d, *J* = 7.0 Hz, 3H), 0.94 (s, 3H), 0.93 (s, 3H).

**<sup>13</sup>C NMR (126 MHz, CDCl<sub>3</sub>)** δ 209.7, 202.6, 143.9, 140.8, 139.9, 137.7, 136.4, 134.8, 130.9, 129.73, 129.67, 127.66, 127.29, 122.66, 122.16, 119.2, 52.7, 45.0, 34.6, 33.7, 30.2, 22.4, 21.6, 17.4.

**HRMS (ESI-TOF)** *m/z*: [M + NH<sub>4</sub>]<sup>+</sup> calcd for C<sub>31</sub>H<sub>41</sub>N<sub>2</sub>O<sub>5</sub>S 553.2731, found 553.2740

*N*-(2-(4-(7-isopropyl-1,4a-dimethyl-1,2,3,4,4a,4b,5,6,10,10a-decahydrophenanthren-1-yl)-4-oxobutanoyl)phenyl)-4-methylbenzenesulfonamide

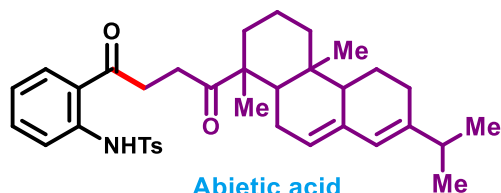

**Abietic acid**

**31**, 80%

Purified by (petroleum ether/EtOAc: 80/20), 94 mg, light yellow liquid.

**<sup>1</sup>H NMR (400 MHz, CDCl<sub>3</sub>)** δ 11.34 (s, 1H), 7.92 (dd, *J* = 8.1, 1.6 Hz, 1H), 7.74 – 7.67 (m, 3H), 7.47 – 7.42 (m, 1H), 7.24 (d, *J* = 8.6 Hz, 2H), 7.08 (td, *J* = 7.4, 1.2 Hz, 1H), 5.81 (s, 1H), 5.40 (dd, *J* = 5.1, 2.8 Hz, 1H), 3.22 – 3.09 (m, 2H), 2.98 – 2.86 (m, 2H), 2.37 (s, 3H), 2.27 – 2.23 (m, 1H), 2.15 – 2.06 (m, 4H), 2.02 (dd, *J* = 12.0, 1.6 Hz, 2H), 1.86 (d, *J* = 8.6 Hz, 1H), 1.73 – 1.62 (m, 7H), 1.32 (s, 3H), 1.05 (d, *J* = 3.3 Hz, 3H), 1.03 (d, *J* = 3.4 Hz, 3H), 0.90 (s, 3H).

**<sup>13</sup>C NMR (101 MHz, CDCl<sub>3</sub>)** δ 214.6, 203.0, 145.5, 143.9, 140.0, 136.6, 135.8, 134.8, 131.1, 130.0, 129.8, 127.4, 122.8, 122.5, 120.7, 119.3, 51.7, 51.3, 44.4, 38.6, 37.2, 35.0, 34.7, 33.7, 31.3, 27.6, 25.8, 22.7, 21.68, 21.55, 21.0, 18.3, 16.9, 14.4.

**HRMS (ESI-TOF)** *m/z*: [M + H]<sup>+</sup> calcd for C<sub>36</sub>H<sub>46</sub>NO<sub>4</sub>S 588.3142, found 588.3148

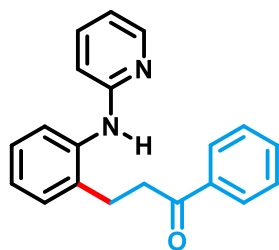

42, 90%

Purified by (petroleum ether/EtOAc: 85/15), 54 mg, white solid.

**<sup>1</sup>H NMR (500 MHz, CDCl<sub>3</sub>)** δ 8.18 (dd, *J* = 5.5, 1.9 Hz, 1H), 7.95 – 7.89 (m, 2H), 7.57 – 7.50 (m, 2H), 7.48 – 7.40 (m, 4H), 7.29 (dd, *J* = 7.6, 1.6 Hz, 1H), 7.21 (td, *J* = 7.7, 1.6 Hz, 1H), 7.09 (td, *J* = 7.5, 1.3 Hz, 1H), 6.72 (d, *J* = 8.4 Hz, 1H), 6.71 – 6.66 (m, 1H), 3.36 (t, *J* = 6.9 Hz, 2H), 3.09 (t, *J* = 6.9 Hz, 2H).

**<sup>13</sup>C NMR (126 MHz, CDCl<sub>3</sub>)**: δ 199.7, 157.1, 148.2, 138.4, 137.8, 136.6, 134.7, 133.2, 130.39, 128.58, 128.13, 127.2, 124.6, 123.9, 114.4, 108.1, 39.6, 25.3

**HRMS (ESI-TOF)** *m/z*: [M + Na]<sup>+</sup> calcd for C<sub>20</sub>H<sub>18</sub>N<sub>2</sub>NaO 325.1311, found 325.1319

***3-(5-bromo-2-(pyridin-2-ylamino)phenyl)-1-phenylpropan-1-one***

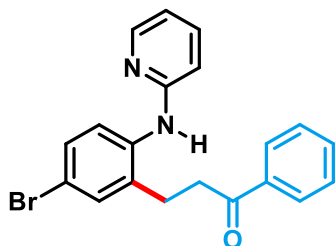

43, 88%

Purified by (petroleum ether/EtOAc: 85/15), 67 mg, sticky solid.

**<sup>1</sup>H NMR (400 MHz, CDCl<sub>3</sub>)** δ 8.19 (dd, *J* = 5.0, 1.1 Hz, 1H), 7.97 – 7.89 (m, 2H), 7.62 (s, 1H), 7.58 – 7.46 (m, 3H), 7.46 – 7.41 (m, 2H), 7.38 (d, *J* = 2.4 Hz, 1H), 7.29 (dd, *J* = 8.6, 2.4 Hz, 1H), 6.79 – 6.74 (m, 1H), 6.74 – 6.68 (m, 1H), 3.38 (t, *J* = 6.6 Hz, 2H), 3.05 (t, *J* = 6.6 Hz, 2H).

**<sup>13</sup>C NMR (101 MHz, CDCl<sub>3</sub>)** δ 199.7, 156.5, 148.3, 137.9, 137.7, 136.4, 135.99, 133.5, 132.97, 130.0, 128.65, 128.16, 124.6, 116.3, 114.8, 108.8, 39.6, 24.7

**HRMS (ESI-TOF)** *m/z*: [M + Na]<sup>+</sup> calcd for C<sub>20</sub>H<sub>17</sub>BrN<sub>2</sub>NaO 403.0416, found 403.0421

***3-(5-chloro-2-(pyridin-2-ylamino)phenyl)-1-phenylpropan-1-one***



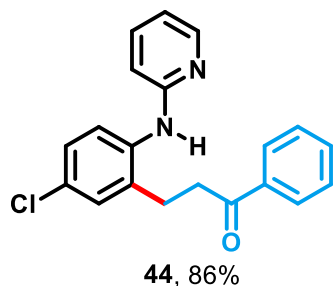

Purified by (petroleum ether/EtOAc: 85/15), 58 mg, light yellow liquid.

**<sup>1</sup>H NMR (400 MHz, CDCl<sub>3</sub>)** δ 8.17 (dd, *J* = 6.3, 1.6 Hz, 1H), 7.96 – 7.91 (m, 2H), 7.74 – 7.65 (s, 1H), 7.58 – 7.52 (m, 2H), 7.51 – 7.46 (m, 1H), 7.43 (dd, *J* = 8.4, 7.1 Hz, 2H), 7.24 (d, *J* = 2.5 Hz, 1H), 7.16 (dd, *J* = 8.6, 2.5 Hz, 1H), 6.75 – 6.70 (m, 2H), 3.38 (t, *J* = 6.7 Hz, 2H), 3.05 (t, *J* = 6.7 Hz, 2H).

**<sup>13</sup>C NMR (101 MHz, CDCl<sub>3</sub>)** δ 199.6, 156.7, 148.0, 137.9, 137.2, 136.42, 136.09, 133.4, 130.1, 129.0, 128.65, 128.26, 127.2, 124.7, 114.7, 108.7, 39.5, 24.9

**HRMS (ESI-TOF)** *m/z*: [M + H]<sup>+</sup> calcd for C<sub>20</sub>H<sub>18</sub>ClN<sub>2</sub>O 337.1102, found 337.1137.

***3-(5-methoxy-2-(pyridin-2-ylamino)phenyl)-1-phenylpropan-1-one***

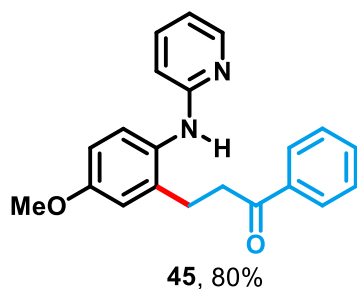

Purified by (petroleum ether/EtOAc: 80/20), 53 mg, sticky solid.

**<sup>1</sup>H NMR (400 MHz, CDCl<sub>3</sub>)** δ 8.07 (ddd, *J* = 5.1, 1.9, 0.9 Hz, 1H), 7.90 – 7.85 (m, 2H), 7.53 – 7.48 (m, 1H), 7.44 – 7.36 (m, 4H), 7.27 (d, *J* = 8.7 Hz, 1H), 6.85 (d, *J* = 3.0 Hz, 1H), 6.77 (dd, *J* = 8.6, 3.1 Hz, 1H), 6.63 – 6.59 (m, 1H), 6.45 (d, *J* = 8.5 Hz, 1H), 3.78 (s, 3H), 3.28 (t, *J* = 7.2 Hz, 2H), 3.02 (t, *J* = 7.2 Hz, 2H).

**<sup>13</sup>C NMR (101 MHz, CDCl<sub>3</sub>)** δ 199.5, 158.3, 157.5, 147.6, 138.84, 138.07, 136.6, 133.1, 130.9, 128.56, 128.12, 127.9, 115.6, 113.7, 112.6, 107.1, 55.4, 39.6, 26.1

**HRMS (ESI-TOF)** *m/z*: [M + Na]<sup>+</sup> calcd for C<sub>21</sub>H<sub>20</sub>N<sub>2</sub>NaO<sub>2</sub> 355.1417, found 355.1421

***ethyl 3-(3-oxo-3-phenylpropyl)-4-(pyridin-2-ylamino)benzoate***

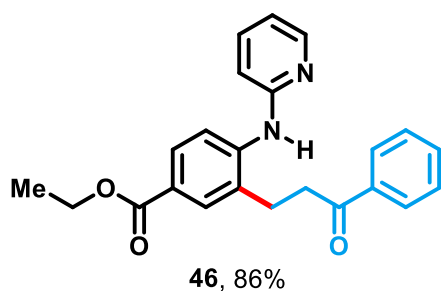

Purified by (petroleum ether/EtOAc: 80/20), 64 mg, sticky solid.

$^1\text{H NMR}$  (400 MHz,  $\text{CDCl}_3$ )  $\delta$  8.09 (dd,  $J = 5.2, 1.9$  Hz, 1H), 7.90 – 7.86 (m, 5H), 7.54 – 7.49 (m, 2H), 7.41 – 7.37 (m, 3H), 6.65 (dd,  $J = 7.0, 5.3$  Hz, 1H), 6.30 (d,  $J = 8.3$  Hz, 1H), 4.36 (q,  $J = 7.1$  Hz, 2H), 3.32 (t, q,  $J = 7.3$  Hz 2H), 3.04 (t, q,  $J = 7.3$  Hz 2H), 1.37 (t,  $J = 7.1$  Hz, 3H).

$^{13}\text{C NMR}$  (101 MHz,  $\text{CDCl}_3$ )  $\delta$  199.5, 166.3, 157.6, 147.8, 141.0, 140.0, 138.4, 136.5, 133.2, 129.6, 128.82, 128.57, 128.12, 114.3, 107.4, 61.1, 39.6, 26.4, 14.4

HRMS (ESI-TOF)  $m/z$ :  $[\text{M} + \text{H}]^+$  calcd for  $\text{C}_{23}\text{H}_{23}\text{N}_2\text{O}_3$  375.1703, found 375.1708

**3-(4-chloro-3-methyl-2-(pyridin-2-ylamino)phenyl)-1-phenylpropan-1-one**

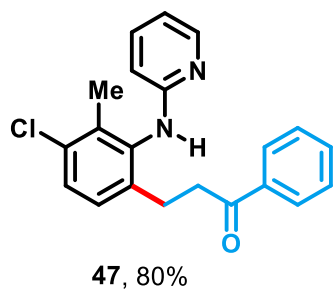

Purified by (petroleum ether/EtOAc: 85/15), 56 mg, 72%, light yellow liquid.

$^1\text{H NMR}$  (400 MHz,  $\text{CDCl}_3$ )  $\delta$  8.05 (dd,  $J = 5.3, 2.1$  Hz, 2H), 7.84 (dd,  $J = 8.4, 1.4$  Hz, 2H), 7.50 (t,  $J = 7.4$  Hz, 1H), 7.44 – 7.35 (m, 3H), 7.28 – 7.24 (m, 1H), 7.13 (d,  $J = 8.3$  Hz, 1H), 6.63 (td,  $J = 6.1, 1.1$  Hz, 1H), 6.09 (d,  $J = 8.3$  Hz, 1H), 3.23 (t,  $J = 7.2$  Hz, 2H), 2.99 (t,  $J = 7.2$  Hz, 2H), 2.26 (s, 3H).

$^{13}\text{C NMR}$  (101 MHz,  $\text{CDCl}_3$ )  $\delta$  199.3, 157.7, 147.2, 138.67, 138.45, 137.6, 136.5, 135.6, 133.36, 133.15, 128.56, 128.28, 128.08, 127.9, 113.8, 106.7, 39.5, 26.3, 15.8

HRMS (ESI-TOF)  $m/z$ :  $[\text{M} + \text{H}]^+$  calcd for  $\text{C}_{21}\text{H}_{20}\text{ClN}_2\text{O}$  351.1259, found 351.1262

**1-phenyl-3-(1-(pyridin-2-ylamino)naphthalen-2-yl)propan-1-one**

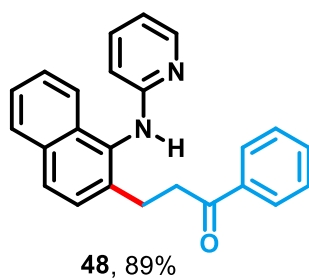

Purified by (petroleum ether/EtOAc: 85/15), 63 mg, light yellow liquid.

**<sup>1</sup>H NMR (400 MHz, CDCl<sub>3</sub>)** δ 8.17 (dd, *J* = 5.2, 1.1 Hz, 1H), 8.00 – 7.95 (m, 1H), 7.90 – 7.82 (m, 3H), 7.78 (d, *J* = 8.5 Hz, 1H), 7.50 (dd, *J* = 8.8, 7.9 Hz, 2H), 7.47 – 7.43 (m, 2H), 7.43 – 7.36 (m, 3H), 7.34 – 7.28 (m, 1H), 6.65 (ddd, *J* = 7.2, 5.1, 1.0 Hz, 1H), 6.01 (d, *J* = 8.4 Hz, 1H), 3.35 (t, *J* = 6.8 Hz, 2H), 3.23 (t, *J* = 6.9 Hz, 2H).

**<sup>13</sup>C NMR (101 MHz, CDCl<sub>3</sub>)** δ 199.3, 158.8, 148.0, 138.1, 136.66, 136.61, 133.52, 133.13, 132.9, 131.7, 128.57, 128.20, 128.11, 128.09, 127.5, 126.7, 125.7, 123.8, 113.9, 106.9, 39.6, 26.5.

**HRMS (ESI-TOF)** *m/z*: [M + Na]<sup>+</sup> calcd for C<sub>24</sub>H<sub>20</sub>N<sub>2</sub>NaO 375.1468, found 375.1473.

***1-phenyl-3-(2-(pyridin-2-ylamino)-9H-fluoren-3-yl)propan-1-one***

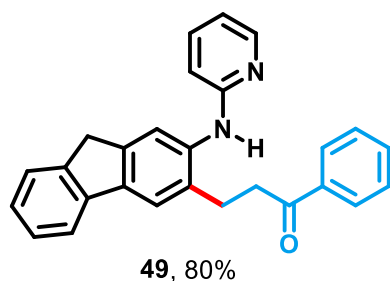

Purified by (petroleum ether/EtOAc: 85/15), 62 mg, light yellow liquid.

**<sup>1</sup>H NMR (400 MHz, CDCl<sub>3</sub>)** δ 8.09 (dd, *J* = 5.6, 2.0 Hz, 1H), 7.95 (dd, *J* = 8.4, 1.3 Hz, 2H), 7.74 (d, *J* = 7.4 Hz, 1H), 7.72 (s, 1H), 7.61 (s, 1H), 7.57 – 7.45 (m, 4H), 7.44 – 7.39 (m, 2H), 7.36 (d, *J* = 8.7 Hz, 1H), 7.29 (dd, *J* = 7.4, 1.3 Hz, 1H), 6.72 – 6.65 (m, 2H), 3.86 (s, 2H), 3.40 (t, *J* = 7.2 Hz, 2H), 3.17 (t, *J* = 7.2 Hz, 2H).

**<sup>13</sup>C NMR (101 MHz, CDCl<sub>3</sub>)** δ 199.8, 157.4, 146.4, 143.4, 142.5, 141.3, 139.2, 138.7, 136.72, 136.66, 134.8, 133.1, 128.5, 128.2, 126.8, 126.4, 125.0, 121.61, 121.58, 119.6, 113.8, 108.4, 40.0, 36.7, 26.2

**HRMS (ESI-TOF)** *m/z*: [M + H]<sup>+</sup> calcd for C<sub>27</sub>H<sub>23</sub>N<sub>2</sub>O 391.1805, found 391.1816

***1-mesityl-4-(2-(pyridin-2-ylamino)phenyl)butan-2-one***

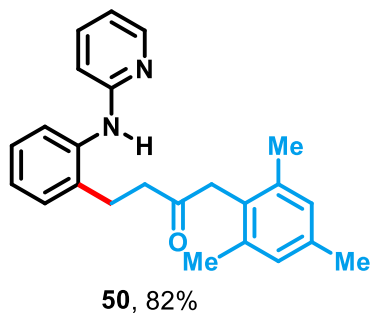

Purified by (petroleum ether/EtOAc: 85/15), 59 mg, light yellow liquid.

**<sup>1</sup>H NMR (400 MHz, CDCl<sub>3</sub>)** δ 8.11 (dd, *J* = 5.5, 2.4 Hz, 1H), 7.61 (s, 1H), 7.49 – 7.39 (m, 2H), 7.24 – 7.14 (m, 2H), 7.07 (td, *J* = 7.5, 1.5 Hz, 1H), 6.82 (s, 2H), 6.73 – 6.66 (m, 1H), 6.63 (d, *J* = 8.4 Hz, 1H), 3.65 (s, 2H), 2.91 (t, *J* = 7.0 Hz, 2H), 2.75 (t, *J* = 7.0 Hz, 2H), 2.25 (s, 3H), 2.09 (s, 6H).

**<sup>13</sup>C NMR (101 MHz, CDCl<sub>3</sub>)** δ 208.7, 157.1, 147.4, 138.1, 136.70, 136.43, 135.0, 130.3, 129.36, 129.00, 128.9, 127.2, 124.84, 124.33, 120.6, 114.2, 108.1, 44.3, 42.4, 25.1, 20.9, 20.3

**HRMS (ESI-TOF)** *m/z*: [M + Na]<sup>+</sup> calcd for C<sub>24</sub>H<sub>26</sub>N<sub>2</sub>NaO 381.1937, found 381.1931.

***1-(furan-2-yl)-3-(2-(pyridin-2-ylamino)phenyl)propan-1-one***

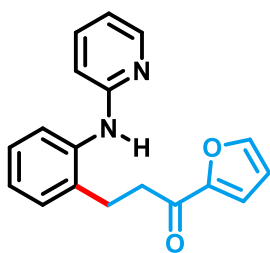

**51**, 82%

Purified by (petroleum ether/EtOAc: 85/15), 48 mg, light yellow liquid.

**<sup>1</sup>H NMR (400 MHz, CDCl<sub>3</sub>)** δ 8.08 (dd, *J* = 6.1, 1.9 Hz, 1H), 7.94 (s, 1H), 7.50 (d, *J* = 2.1 Hz, 1H), 7.45 – 7.40 (m, 2H), 7.27 – 7.24 (m, 1H), 7.18 (td, *J* = 7.7, 1.9 Hz, 1H), 7.11 (d, *J* = 3.5 Hz, 1H), 7.07 (td, *J* = 7.5, 1.5 Hz, 1H), 6.69 – 6.61 (m, 2H), 6.44 (dd, *J* = 3.6, 1.7 Hz, 1H), 3.16 (t, *J* = 7.3 Hz, 2H), 3.03 (t, *J* = 7.3 Hz, 2H).

**<sup>13</sup>C NMR (101 MHz, CDCl<sub>3</sub>)** δ 188.8, 157.2, 152.4, 147.2, 146.5, 138.21, 138.14, 135.0, 130.4, 127.3, 124.9, 124.3, 117.4, 114.1, 112.2, 108.2, 39.3, 25.4

**HRMS (ESI-TOF)** *m/z*: [M + Na]<sup>+</sup> calcd for C<sub>18</sub>H<sub>16</sub>N<sub>2</sub>NaO<sub>2</sub> 315.1104, found 315.1120

***1-((1*s*,3*s*)-adamantan-1-yl)-3-(2-(pyridin-2-ylamino)phenyl)propan-1-one***

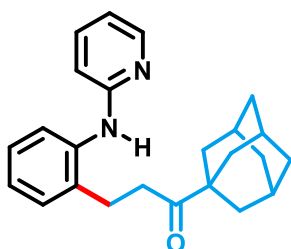

**52**, 88%

Purified by (petroleum ether/EtOAc: 85/15), 63 mg, light yellow liquid.

**<sup>1</sup>H NMR (400 MHz, CDCl<sub>3</sub>)** δ 8.16 (d, *J* = 5.5 Hz, 1H), 7.50 (dd, *J* = 8.5, 1.4 Hz, 1H), 7.47 – 7.42 (m, 1H), 7.39 (s, 1H), 7.19 (t, *J* = 7.0 Hz, 2H), 7.06 (td, *J* = 7.3, 1.6 Hz, 1H), 6.73 – 6.61

(m, 2H), 2.87 (t,  $J = 7.2$  Hz, 2H), 2.79 (t,  $J = 6.3$  Hz, 2H), 2.00 – 1.95 (m, 3H), 1.69 (d,  $J = 3.0$  Hz, 6H), 1.68 – 1.57 (m, 6H).

$^{13}\text{C}$  NMR (101 MHz,  $\text{CDCl}_3$ )  $\delta$  215.7, 157.1, 148.1, 137.7, 134.9, 130.3, 127.0, 124.4, 123.8, 120.4, 114.2, 108.1, 46.2, 38.1, 37.2, 36.5, 27.9, 25.1

HRMS (ESI-TOF)  $m/z$ :  $[\text{M} + \text{H}]^+$  calcd for  $\text{C}_{24}\text{H}_{29}\text{N}_2\text{O}$  361.2274, found 361.2293

**6-phenyl-1-(2-(pyridin-2-ylamino)phenyl)hexan-3-one**

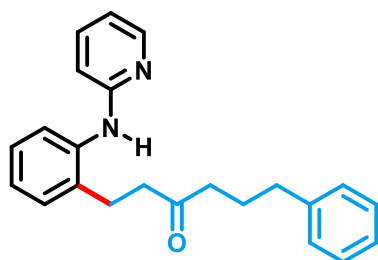

**53**, 92%

Purified by (petroleum ether/EtOAc: 85/15), 63 mg, light yellow liquid.

$^1\text{H}$  NMR (400 MHz,  $\text{CDCl}_3$ )  $\delta$  8.13 (dd,  $J = 5.5, 2.0$  Hz, 1H), 7.63 (s, 1H), 7.50 – 7.42 (m, 2H), 7.26 – 7.23 (m, 2H), 7.21 – 7.16 (m, 3H), 7.13 – 7.06 (m, 3H), 6.71 – 6.65 (m, 2H), 2.89 (t,  $J = 6.9$  Hz, 2H), 2.74 (t,  $J = 6.9$  Hz, 2H), 2.55 (t,  $J = 7.6$  Hz, 2H), 2.35 (t,  $J = 7.4$  Hz, 2H), 1.90 – 1.83 (m, 2H).

$^{13}\text{C}$  NMR (101 MHz,  $\text{CDCl}_3$ )  $\delta$  210.7, 157.1, 147.6, 141.5, 138.1, 138.0, 134.7, 130.3, 128.46, 128.38, 127.2, 125.9, 124.6, 123.9, 114.2, 108.1, 43.5, 41.9, 35.0, 25.1, 24.9

HRMS (ESI-TOF)  $m/z$ :  $[\text{M} + \text{H}]^+$  calcd for  $\text{C}_{23}\text{H}_{25}\text{N}_2\text{O}$  345.1961, found 345.1988

**4-ethyl-4-(3-(3-oxo-3-phenylpropyl)-4-(pyridin-2-ylamino)phenyl)piperidine-2,6-dione**

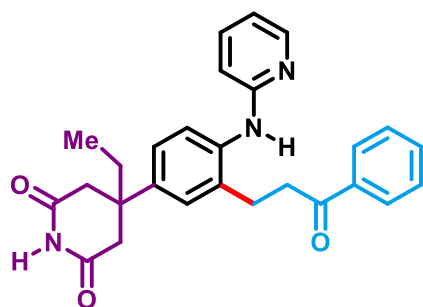

**Aminoglutethimide**

**54**, 75%

Purified by (petroleum ether/EtOAc: 75/25), 66 mg, sticky solid.

$^1\text{H}$  NMR (400 MHz,  $\text{CDCl}_3$ )  $\delta$  8.82 (s, 1H), 8.21 (dd,  $J = 5.1, 1.9$  Hz, 1H), 7.90 (dd,  $J = 8.3, 1.4$  Hz, 2H), 7.78 (s, 1H), 7.58 (d,  $J = 8.5$  Hz, 1H), 7.53 – 7.45 (m, 2H), 7.40 (dd,  $J = 8.4, 7.1$  Hz, 2H), 7.17 (d,  $J = 2.4$  Hz, 1H), 7.10 (dd,  $J = 8.5, 2.4$  Hz, 1H), 6.75 (d,  $J = 8.5$  Hz, 1H), 6.71

(ddd,  $J = 7.3, 5.0, 0.9$  Hz, 1H), 3.32 (t,  $J = 6.8$  Hz, 2H), 3.08 (t,  $J = 6.8$  Hz, 2H), 2.60 – 2.53 (m, 1H), 2.49 – 2.42 (m, 1H), 2.37 – 2.32 (m, 1H), 2.23 – 2.18 (m, 1H), 2.01 (dd,  $J = 14.4, 7.1$  Hz, 1H), 1.87 (dd,  $J = 14.4, 7.1$  Hz, 1H), 0.85 (t,  $J = 7.4$  Hz, 3H).

$^{13}\text{C}$  NMR (101 MHz,  $\text{CDCl}_3$ )  $\delta$  199.8, 175.5, 172.7, 156.7, 147.9, 137.9, 136.5, 134.55, 134.12, 133.3, 128.61, 128.42, 128.15, 124.9, 123.3, 114.6, 108.7, 50.6, 39.5, 33.0, 29.4, 26.9, 25.7, 9.07

HRMS (ESI-TOF)  $m/z$ :  $[\text{M} + \text{H}]^+$  calcd for  $\text{C}_{27}\text{H}_{27}\text{N}_3\text{NaO}_3$  464.1945, found 464.1949

**4-(4-isobutylphenyl)-1-(2-(pyridin-2-ylamino)phenyl)pentan-3-one**

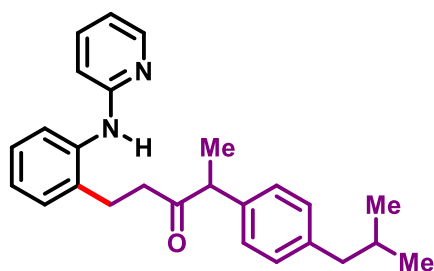

Ibuprofen

55, 90%

Purified by (petroleum ether/EtOAc: 85/15), 70 mg, light yellow liquid.

$^1\text{H}$  NMR (500 MHz,  $\text{CDCl}_3$ )  $\delta$  8.17 (dd,  $J = 5.3, 2.4$  Hz, 1H), 7.46 (dd,  $J = 8.0, 1.3$  Hz, 1H), 7.44 – 7.39 (m, 1H), 7.19 – 7.13 (m, 2H), 7.05 (d,  $J = 7.8$  Hz, 1H), 7.03 – 6.98 (m, 3H), 6.97 – 6.94 (m, 2H), 6.68 (dd,  $J = 7.2, 5.0$  Hz, 1H), 6.62 (d,  $J = 8.4$  Hz, 1H), 3.64 (q,  $J = 6.9$  Hz, 1H), 2.87 – 2.80 (m, 2H), 2.75 – 2.65 (m, 2H), 2.42 (d,  $J = 7.2$  Hz, 2H), 1.88 – 1.78 (m, 1H), 1.32 (d,  $J = 6.9$  Hz, 3H), 0.89 (d,  $J = 6.6$  Hz, 6H).

$^{13}\text{C}$  NMR (126 MHz,  $\text{CDCl}_3$ )  $\delta$  211.0, 157.1, 148.3, 140.5, 138.3, 137.6, 137.5, 134.4, 130.2, 129.6, 127.47, 127.01, 124.4, 123.7, 114.3, 108.0, 52.7, 45.0, 41.6, 30.2, 25.1, 22.4, 17.3

HRMS (ESI-TOF)  $m/z$ :  $[\text{M} + \text{Na}]^+$  calcd for  $\text{C}_{26}\text{H}_{30}\text{N}_2\text{NaO}$  409.2250, found 409.2248.

**7-(2,5-dimethylphenoxy)-4,4-dimethyl-1-(2-(pyridin-2-ylamino)phenyl)heptan-3-one**

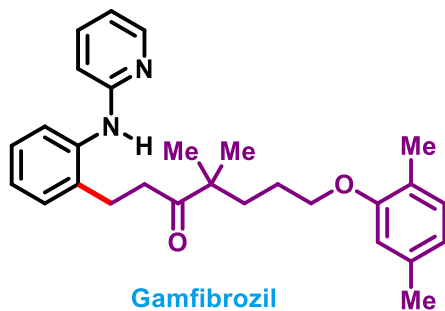

Gamfibrozil

56, 86%

Purified by (petroleum ether/EtOAc: 85/15), 74 mg, light yellow liquid.

**<sup>1</sup>H NMR (400 MHz, CDCl<sub>3</sub>)** δ 8.18 (dd, *J* = 5.2, 2.3 Hz, 1H), 7.53 (dd, *J* = 8.0, 1.4 Hz, 1H), 7.47 – 7.40 (m, 1H), 7.31 (s, 1H), 7.24 – 7.17 (m, 2H), 7.06 (td, *J* = 7.4, 1.3 Hz, 1H), 7.01 (d, *J* = 7.9 Hz, 1H), 6.74 – 6.65 (m, 3H), 6.57 (s, 1H), 3.77 (t, *J* = 6.1 Hz, 2H), 3.08 – 2.67 (m, 4H), 2.32 (s, 3H), 2.15 (s, 3H), 1.67 – 1.60 (m, 2H), 1.51 – 1.43 (m, 2H), 1.08 (s, 6H).

**<sup>13</sup>C NMR (101 MHz, CDCl<sub>3</sub>)** δ 215.8, 157.2, 156.9, 148.4, 138.4, 137.6, 136.5, 134.6, 130.4, 130.3, 127.1, 124.4, 123.76, 123.51, 120.8, 114.4, 111.9, 108.1, 67.8, 47.3, 38.1, 36.5, 25.2, 24.83, 24.30, 21.5, 15.9

**HRMS (ESI-TOF)** *m/z*: [M + H]<sup>+</sup> calcd for C<sub>28</sub>H<sub>35</sub>N<sub>2</sub>O<sub>2</sub> 431.2693, found 431.2713

*1-(7-isopropyl-1,4a-dimethyl-1,2,3,4,4a,4b,5,6,10,10a-decahydrophenanthren-1-yl)-3-(2-pyridin-2-ylamino)phenyl)propan-1-one*

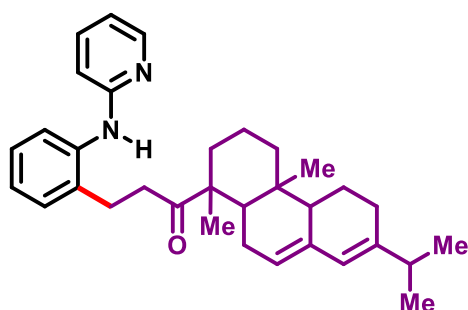

**Abietic acid**

**57**, 84%

Purified by (petroleum ether/EtOAc: 85/15), 81 mg, light yellow liquid.

**<sup>1</sup>H NMR (400 MHz, CDCl<sub>3</sub>)** δ 8.15 (dd, *J* = 5.0, 2.9 Hz, 1H), 7.49 – 7.47 (m, 1H), 7.46 – 7.40 (m, 1H), 7.33 – 7.32 (m, 1H), 7.22 – 7.17 (m, 2H), 7.05 (d, *J* = 7.7 Hz, 1H), 6.70 – 6.64 (m, 2H), 5.73 (s, 1H), 5.19 (d, *J* = 5.1 Hz, 1H), 2.91 – 2.84 (m, 2H), 2.83 – 2.77 (m, 2H), 2.24 – 2.18 (m, 2H), 2.06 (m, *J* = 7.9, 4.2 Hz, 2H), 1.87 (d, *J* = 1.5 Hz, 3H), 1.53 – 1.47 (m, 2H), 1.44 – 1.39 (m, 1H), 1.32 (d, *J* = 5.3 Hz, 2H), 1.25 (s, 2H), 1.22 (d, *J* = 6.9 Hz, 1H), 1.15 (s, 3H), 1.02 (d, *J* = 3.3 Hz, 3H), 1.00 (d, *J* = 3.3 Hz, 3H), 0.78 (s, 3H).

**<sup>13</sup>C NMR (101 MHz, CDCl<sub>3</sub>)** δ 216.2, 157.3, 148.3, 145.3, 138.3, 137.8, 134.9, 130.5, 129.4, 127.2, 124.6, 124.0, 122.6, 120.5, 114.4, 108.1, 51.8, 51.1, 44.2, 38.4, 37.9, 36.2, 35.0, 34.5, 27.6, 25.9, 25.5, 22.6, 21.5, 20.97, 18.2, 16.5, 14.2

**HRMS (ESI-TOF)** *m/z*: [M + H]<sup>+</sup> calcd for C<sub>33</sub>H<sub>43</sub>N<sub>2</sub>O 483.3370, found 483.3381

*4-(3-(7-(2,5-dimethylphenoxy)-4,4-dimethyl-3-oxoheptyl)-4-(pyridin-2-ylamino)phenyl)-4-ethylpiperidine-2,6-dione*

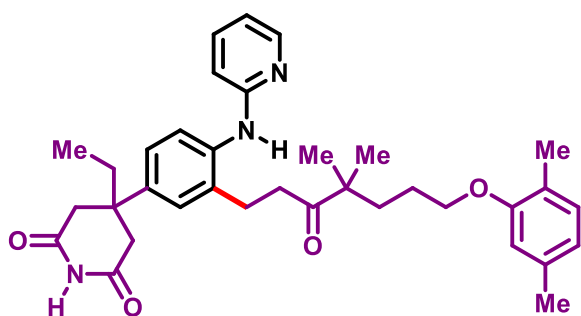

**Aminoglutethimide-Gemfibrozil**

**58**, 88%

Purified by (petroleum ether/EtOAc: 75/25), 100 mg, sticky solid.

**HRMS (ESI-TOF)**  $m/z$ :  $[M + H]^+$  calcd for  $C_{21}H_{17}N_2$  297.1386, found 297.1388.

**$^1H$  NMR (400 MHz,  $CDCl_3$ )**  $\delta$  9.33 (s, 1H), 8.19 (dd,  $J = 5.9, 2.0$  Hz, 1H), 7.88 (s, 1H), 7.52 (d,  $J = 8.4$  Hz, 1H), 7.43 (ddd,  $J = 8.8, 7.2, 2.0$  Hz, 1H), 7.13 (d,  $J = 2.4$  Hz, 1H), 7.09 (dd,  $J = 8.5, 2.6$  Hz, 1H), 6.98 (d,  $J = 7.6$  Hz, 1H), 6.71 – 6.63 (m, 3H), 6.56 (s, 1H), 3.78 (t,  $J = 6.1$  Hz, 2H), 2.95 – 2.88 (m, 2H), 2.86 – 2.80 (m, 2H), 2.61 – 2.55 (m, 1H), 2.51 – 2.43 (m, 1H), 2.37 – 2.32 (m, 1H), 2.29 (s, 3H), 2.20 (dd,  $J = 13.4, 4.8$  Hz, 1H), 2.12 (s, 3H), 2.10 – 1.95 (m, 2H), 1.88 (dd,  $J = 14.1, 7.5$  Hz, 1H), 1.63 – 1.59 (m, 1H), 1.52 – 1.46 (m, 2H), 1.03 (s, 6H), 0.85 (t,  $J = 7.5$  Hz, 3H).

**$^{13}C$  NMR (101 MHz,  $CDCl_3$ )**  $\delta$  215.5, 175.8, 173.1, 156.9, 156.9, 147.6, 138.2, 137.8, 136.5, 135.2, 134.4, 130.4, 128.5, 125.0, 123.80, 123.47, 120.8, 114.5, 112.0, 108.5, 67.8, 50.6, 47.3, 37.8, 36.2, 33.0, 29.4, 27.0, 25.6, 24.9, 24.3, 24.2, 21.5, 15.9, 9.1

**HRMS (ESI-TOF)**  $m/z$ :  $[M + H]^+$  calcd for  $C_{35}H_{44}N_3O_4$  570.3326, found 570.3330

***methyl (S)-(3-oxo-1-(2-oxo-2-phenylethyl)-1,3-dihydroisobenzofuran-4-yl)carbamate***

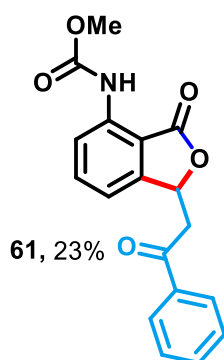

Purified by (petroleum ether/EtOAc: 80/20), 15 mg, sticky solid.

**$^1H$  NMR (400 MHz,  $CDCl_3$ )**  $\delta$  9.07 (s, 1H), 8.27 (d,  $J = 8.3$  Hz, 1H), 7.95 (dd,  $J = 8.4, 1.3$  Hz, 2H), 7.64 – 7.59 (m, 2H), 7.51 – 7.47 (m, 2H), 7.11 (d,  $J = 7.6$  Hz, 1H), 6.16 (t,  $J = 6.5$  Hz, 1H), 3.82 (s, 3H), 3.73 (dd,  $J = 17.6, 6.1$  Hz, 1H), 3.41 (dd,  $J = 17.6, 6.8$  Hz, 1H).



$^{13}\text{C}$  NMR (126 MHz,  $\text{CDCl}_3$ )  $\delta$  195.8, 171.1, 153.8, 150.1, 139.1, 136.6, 134.1, 130.3, 129.0, 128.3, 117.3, 115.8, 111.4, 77.6, 52.8, 43.6

HRMS (ESI-TOF)  $m/z$ :  $[\text{M} + \text{Na}]^+$  calcd for  $\text{C}_{18}\text{H}_{15}\text{NNaO}_5$  348.0842, found 348.0843

*methyl 3-benzoylquinoline-1(2H)-carboxylate*

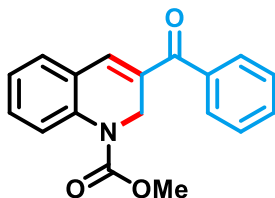

62, 76%

Purified by (petroleum ether/EtOAc: 85/15), 45 mg, light brown liquid.

$^1\text{H}$  NMR (400 MHz,  $\text{CDCl}_3$ )  $\delta$  7.80 – 7.69 (m, 3H), 7.59 (t,  $J = 7.4$  Hz, 1H), 7.49 (t,  $J = 7.4$  Hz, 2H), 7.39 – 7.35 (m, 1H), 7.20 – 7.09 (m, 3H), 4.82 (d,  $J = 1.4$  Hz, 2H), 3.85 (s, 3H).

$^{13}\text{C}$  NMR (101 MHz,  $\text{CDCl}_3$ )  $\delta$  194.2, 154.6, 138.26, 138.16, 137.6, 134.2, 132.2, 130.8, 129.3, 129.1, 128.6, 126.6, 124.6, 123.7, 53.4, 43.3

HRMS (ESI-TOF)  $m/z$ :  $[\text{M} + \text{H}]^+$  calcd for  $\text{C}_{18}\text{H}_{16}\text{NO}_3$  294.1125, found 294.1125.

## 11. $^1\text{H}$ and $^{13}\text{C}$ NMR spectra of the compounds

41b

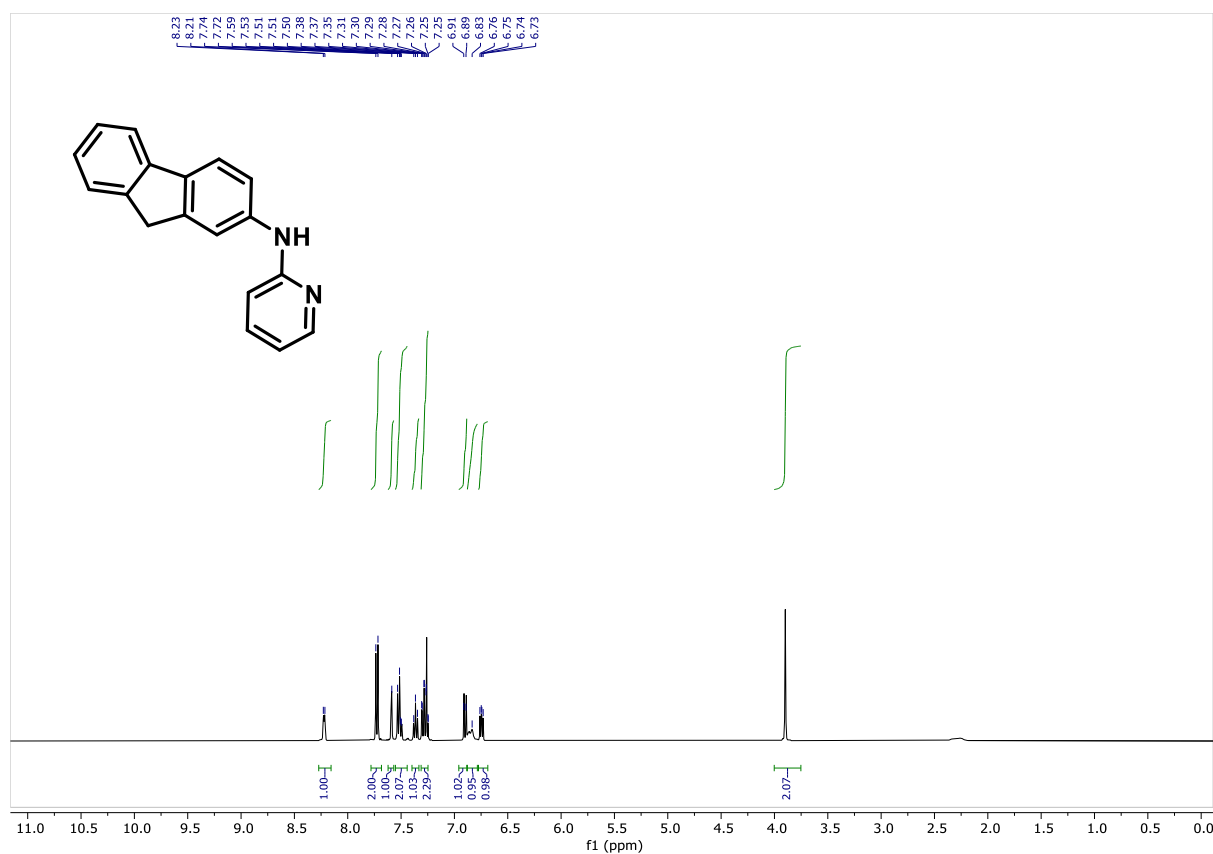

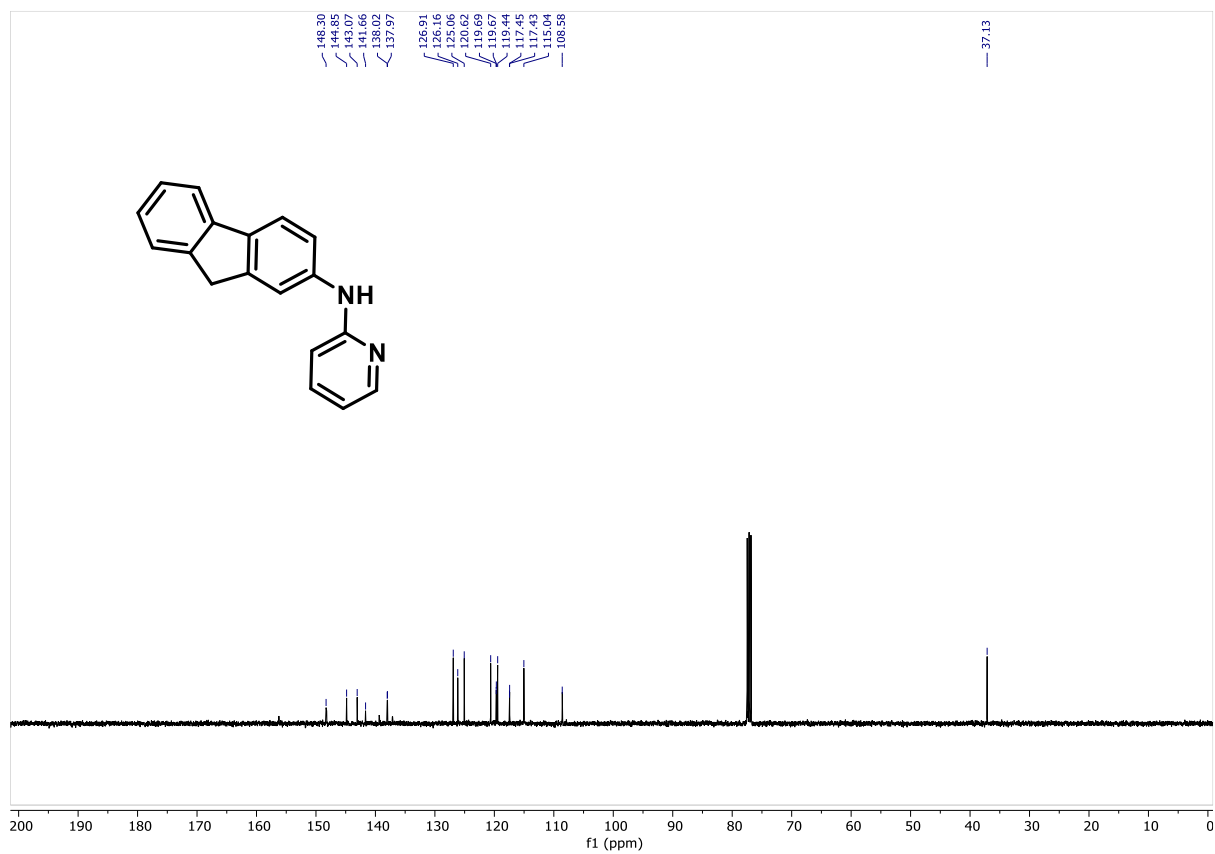

41c

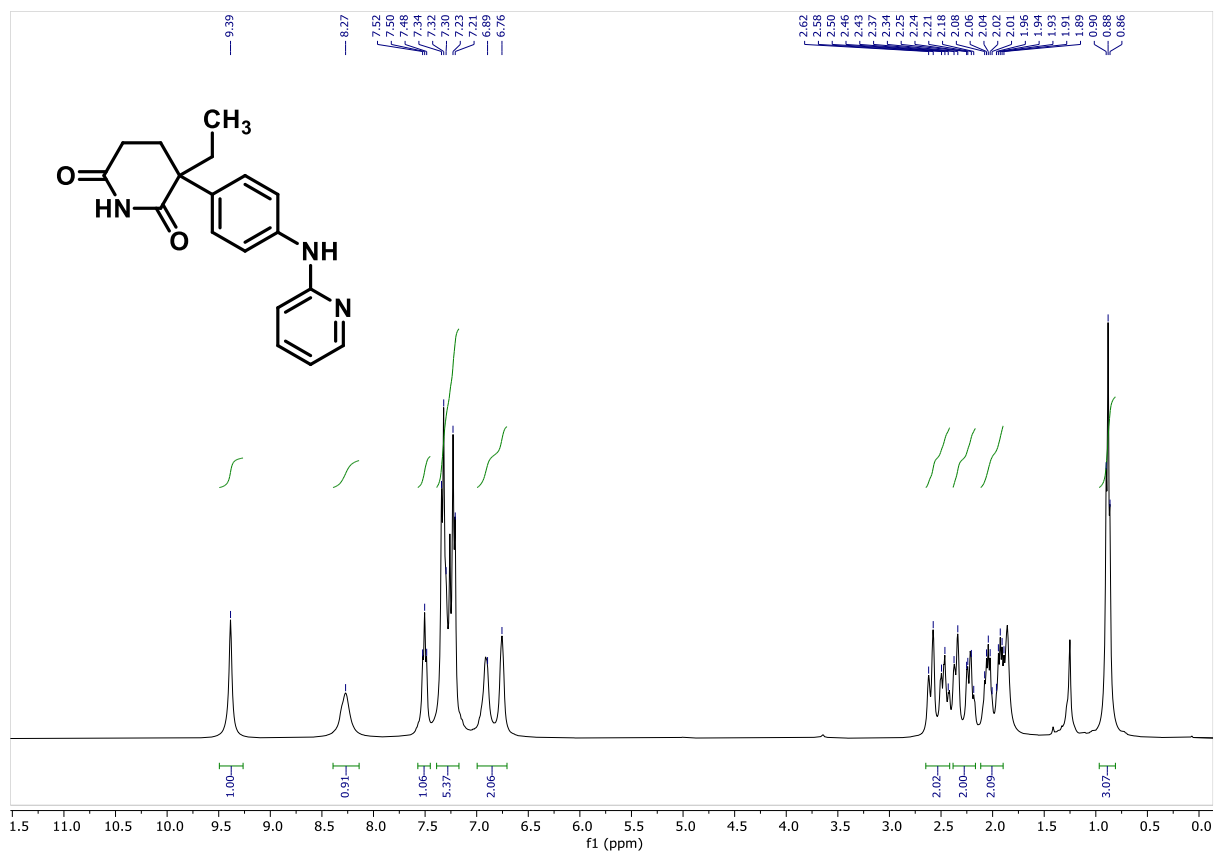

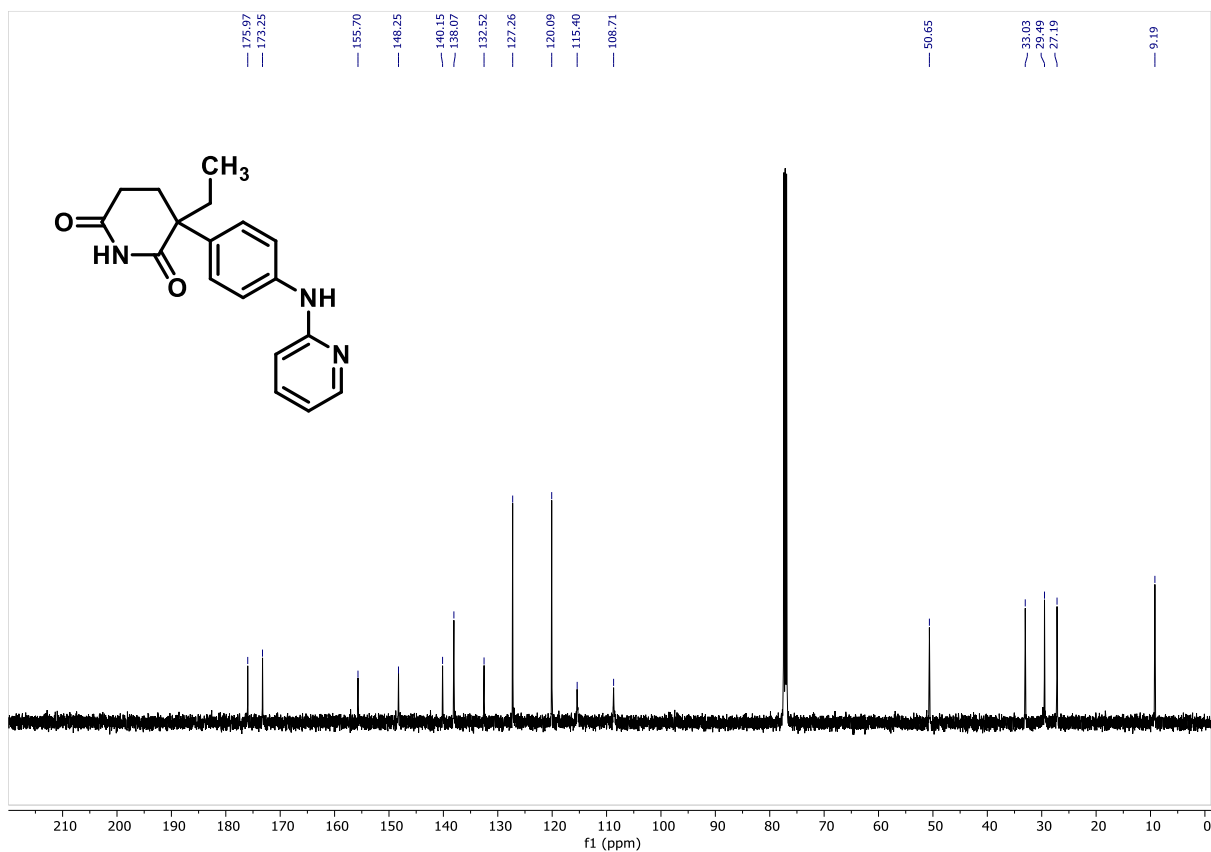

3

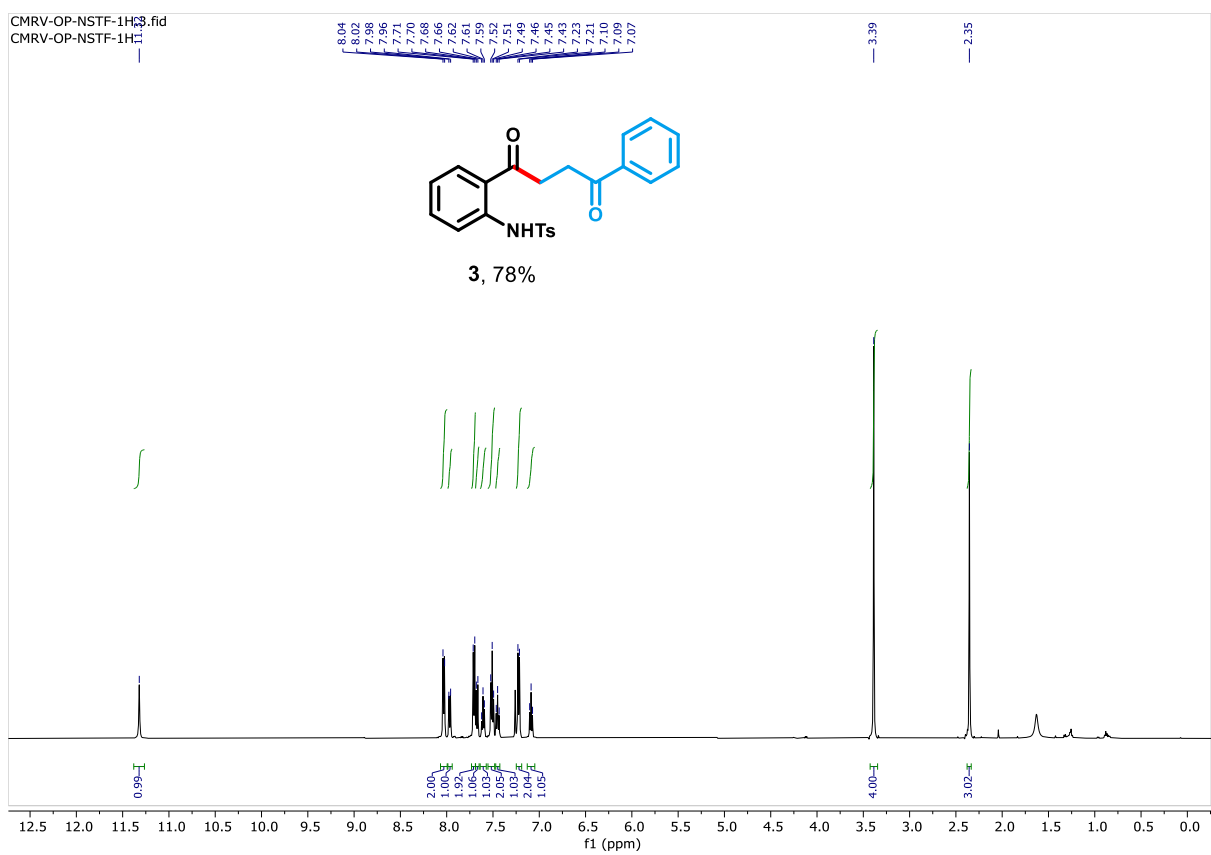

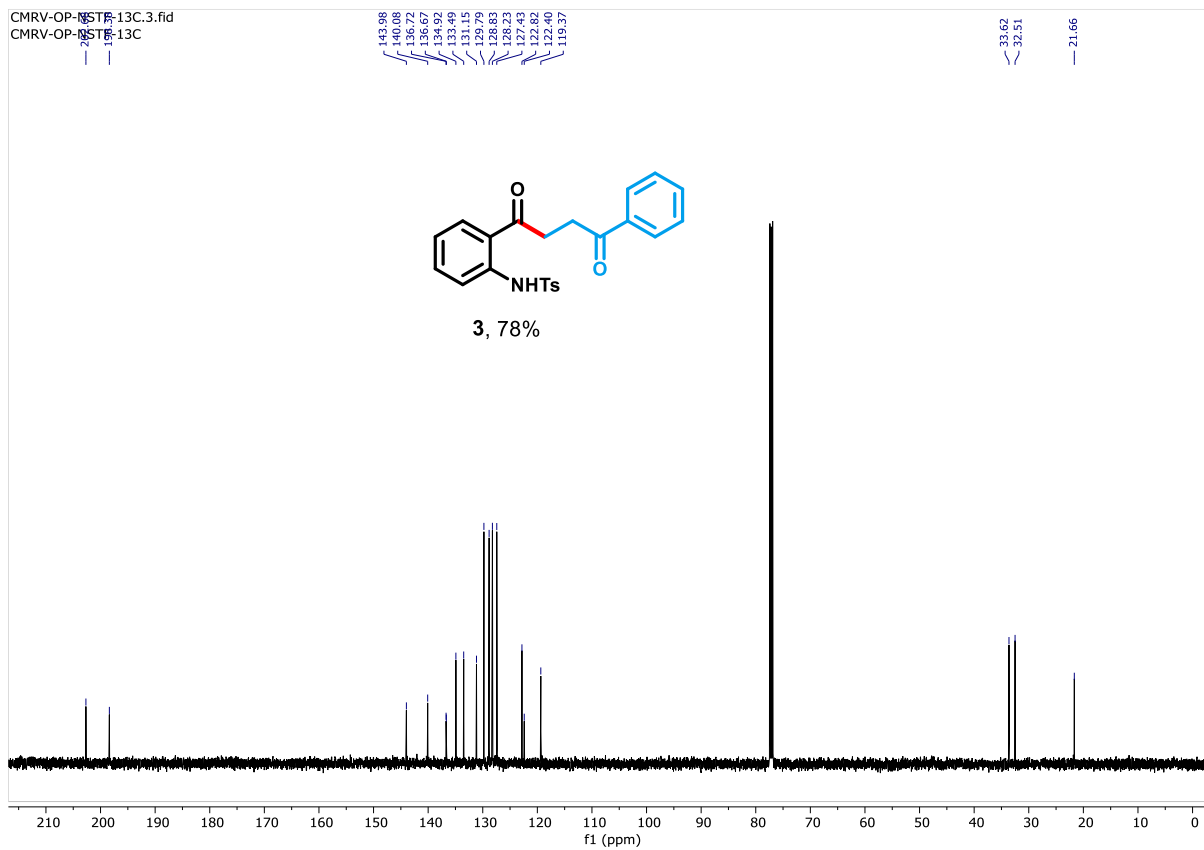

4

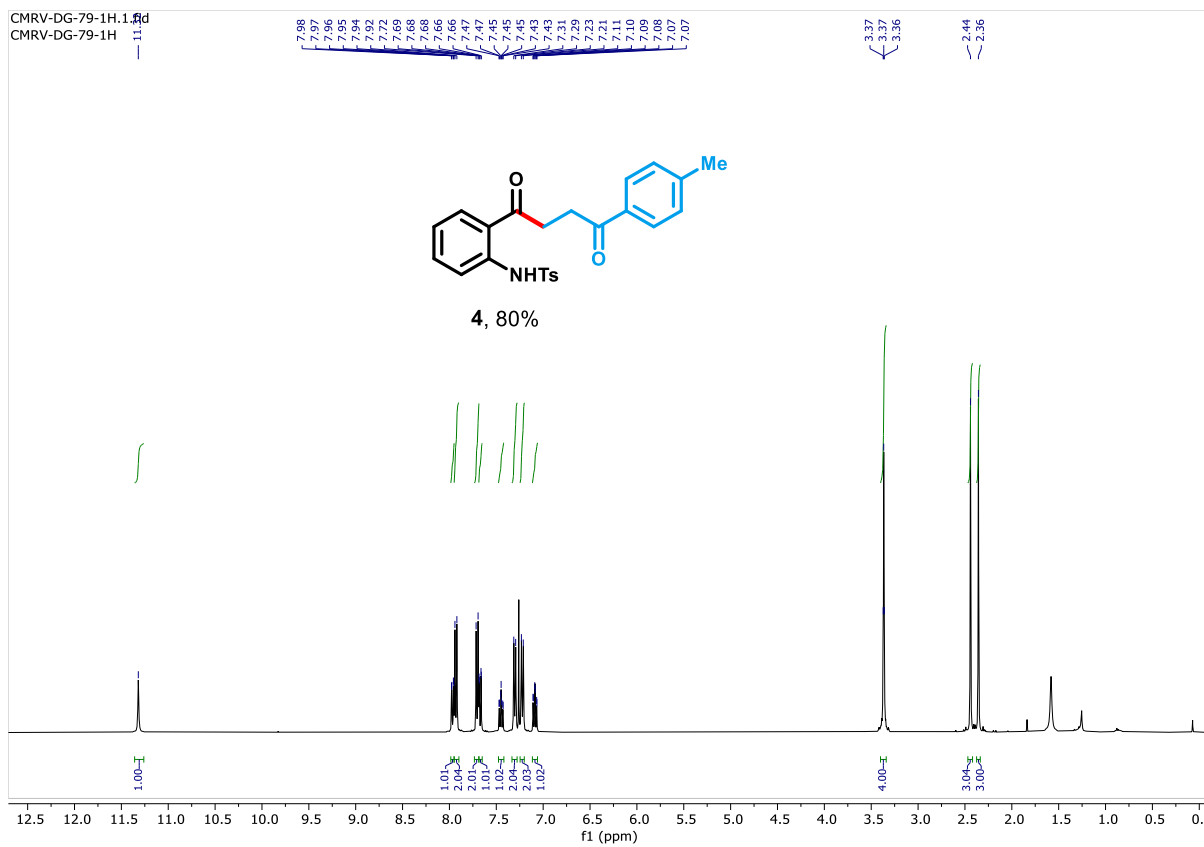

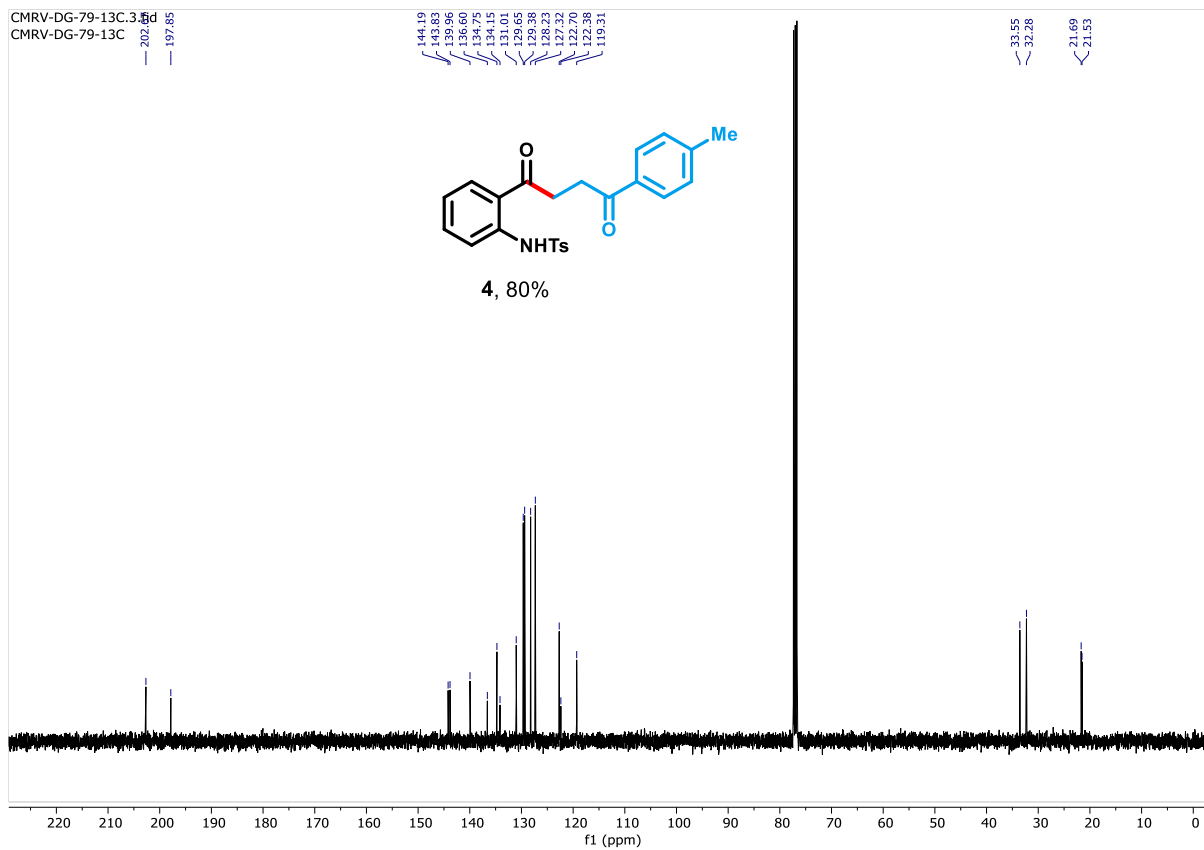

5

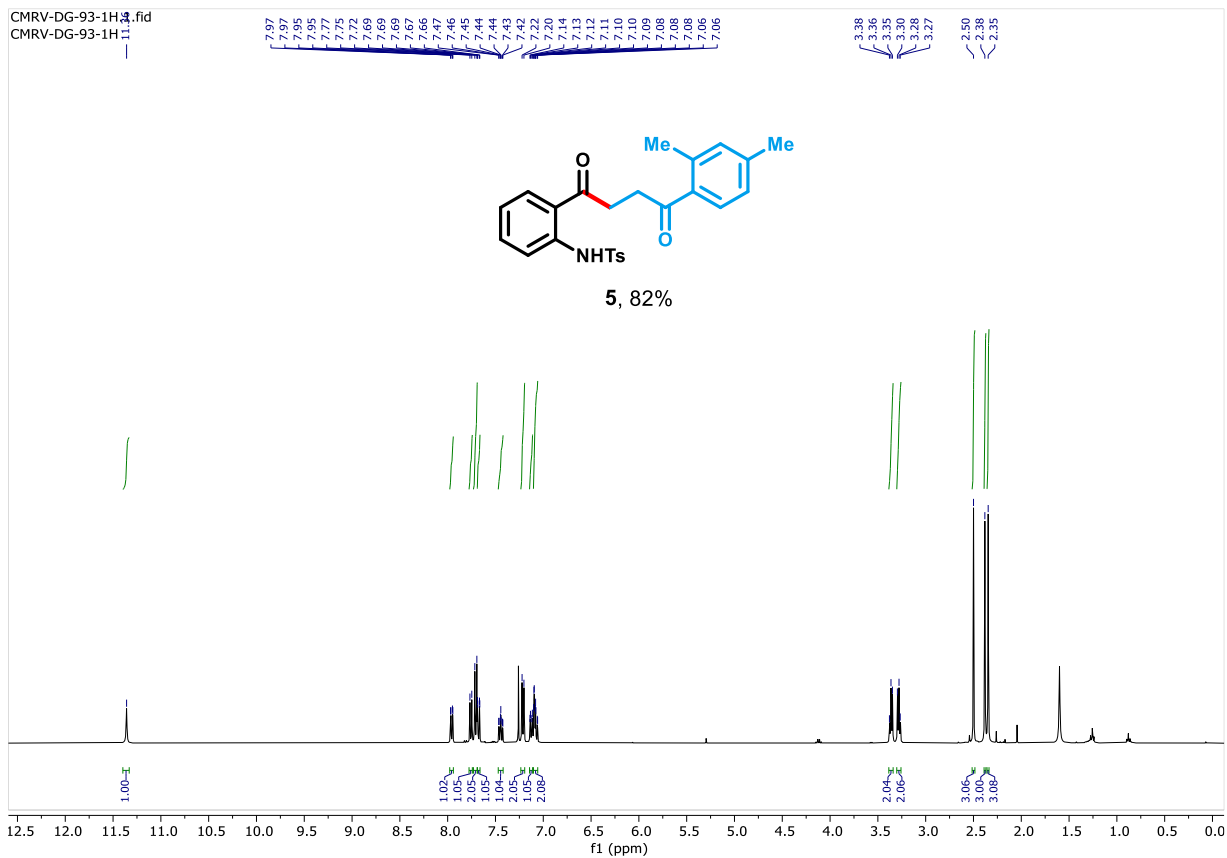

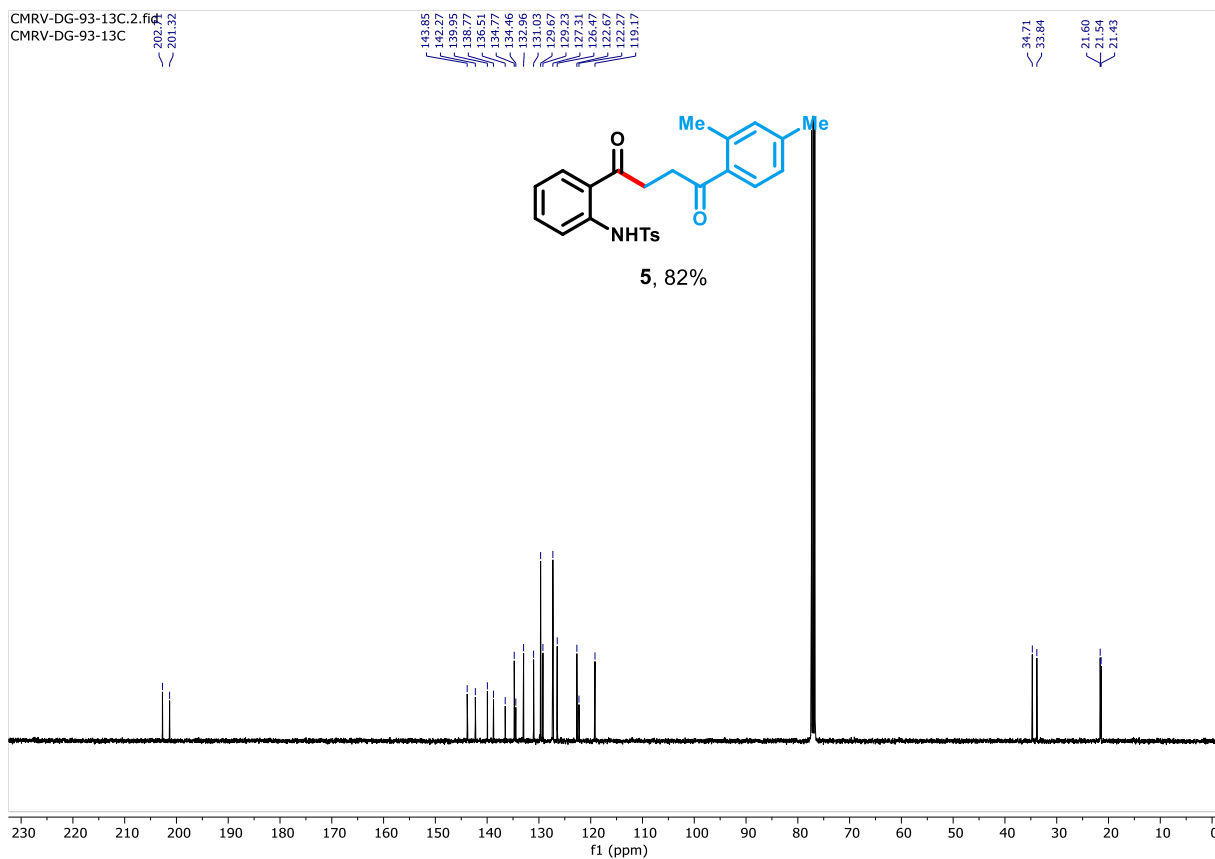

6

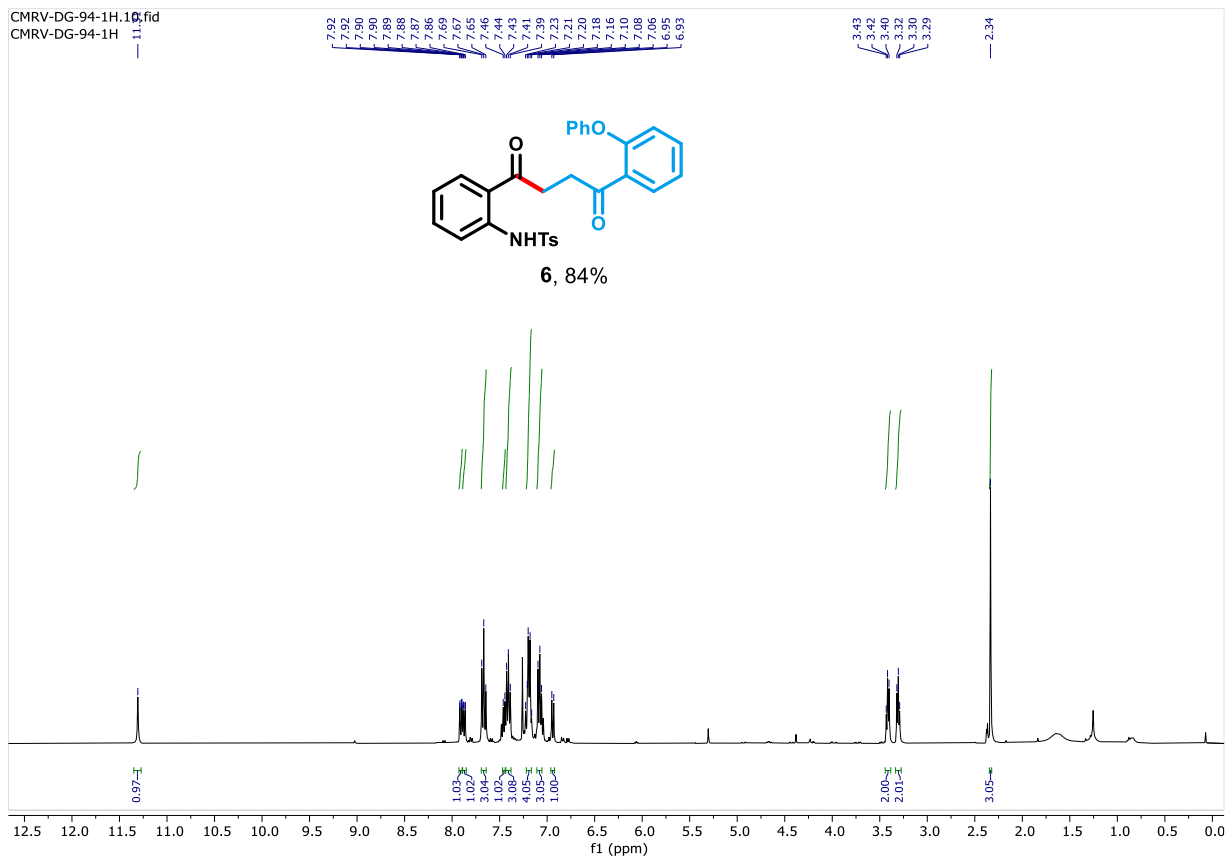

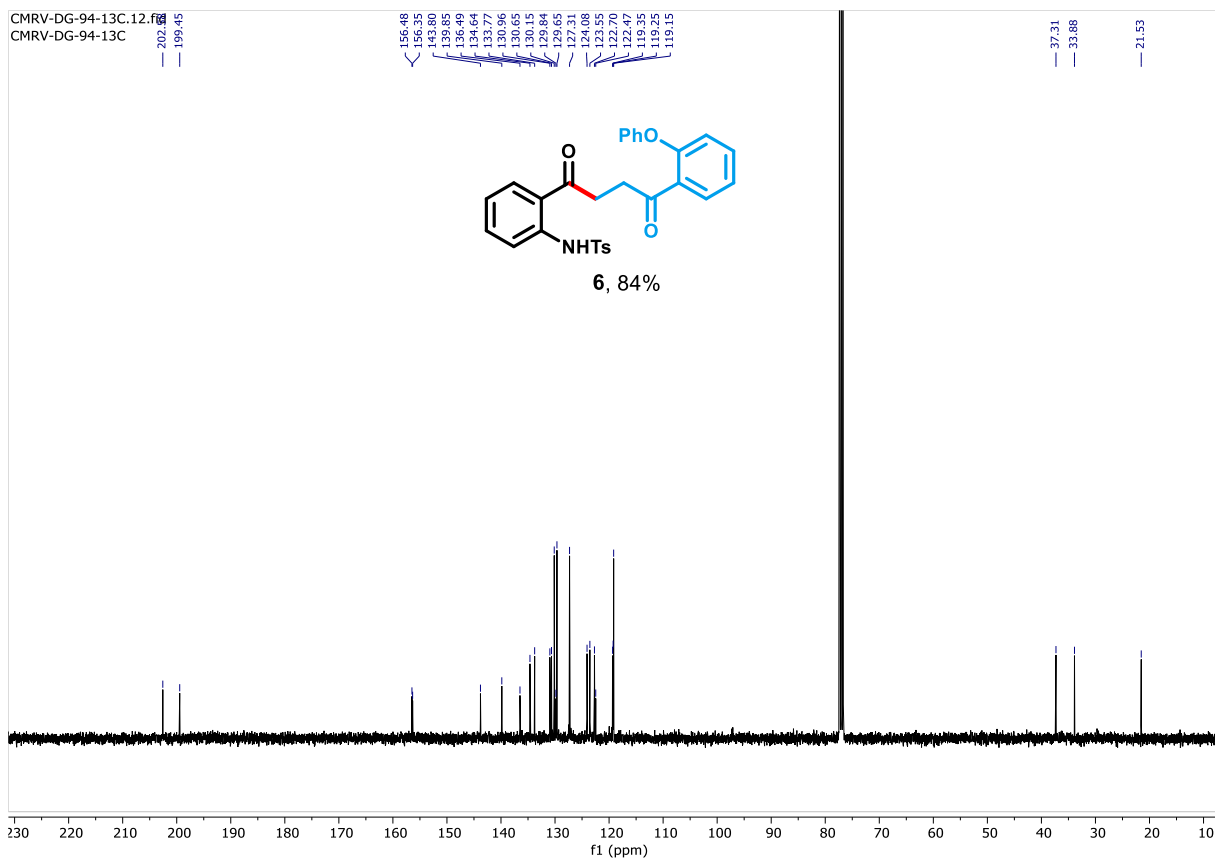

7

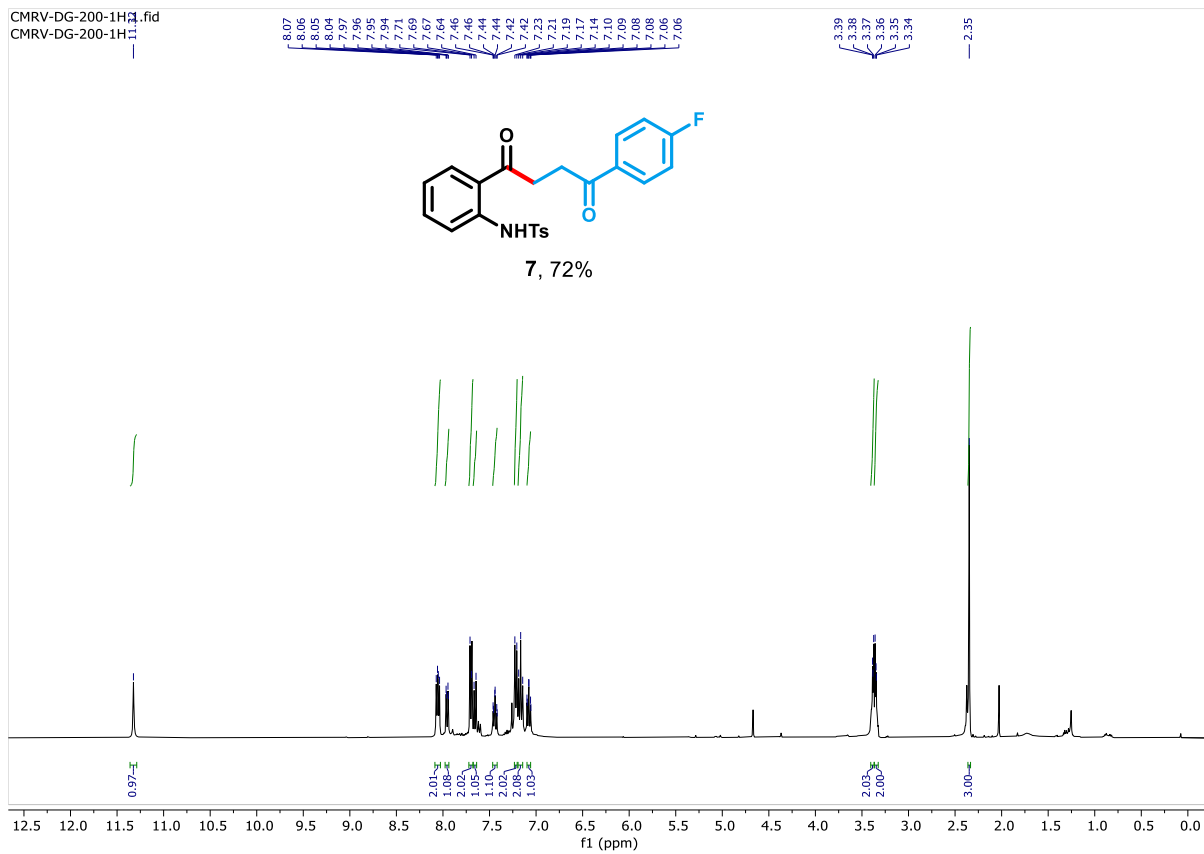

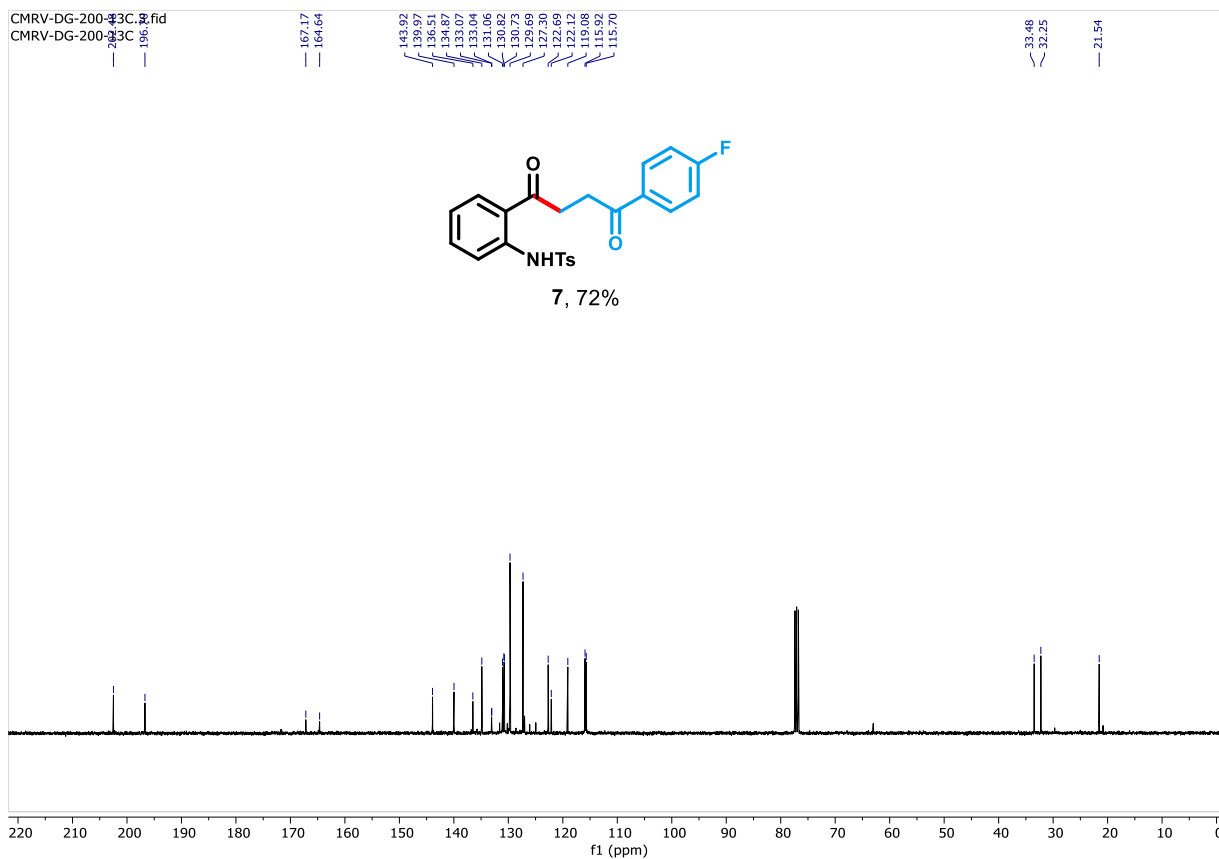

8

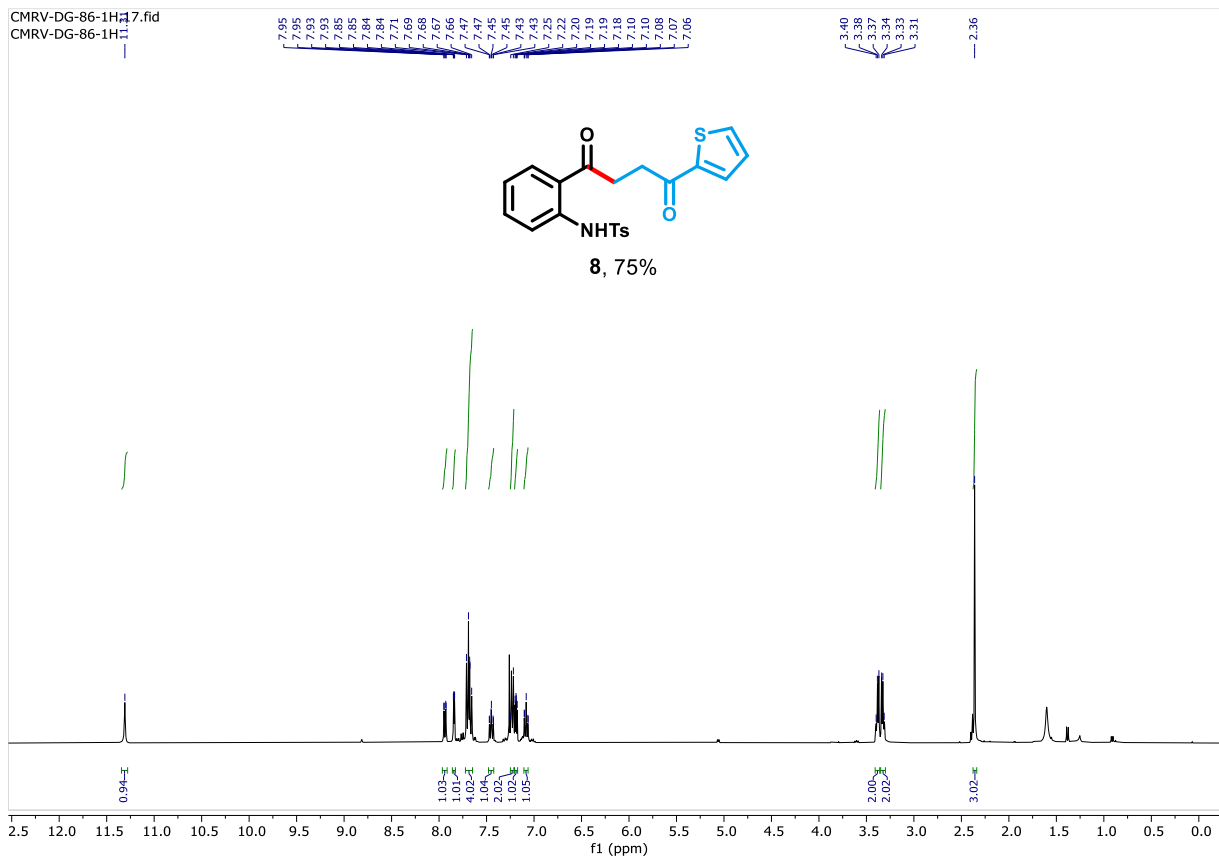



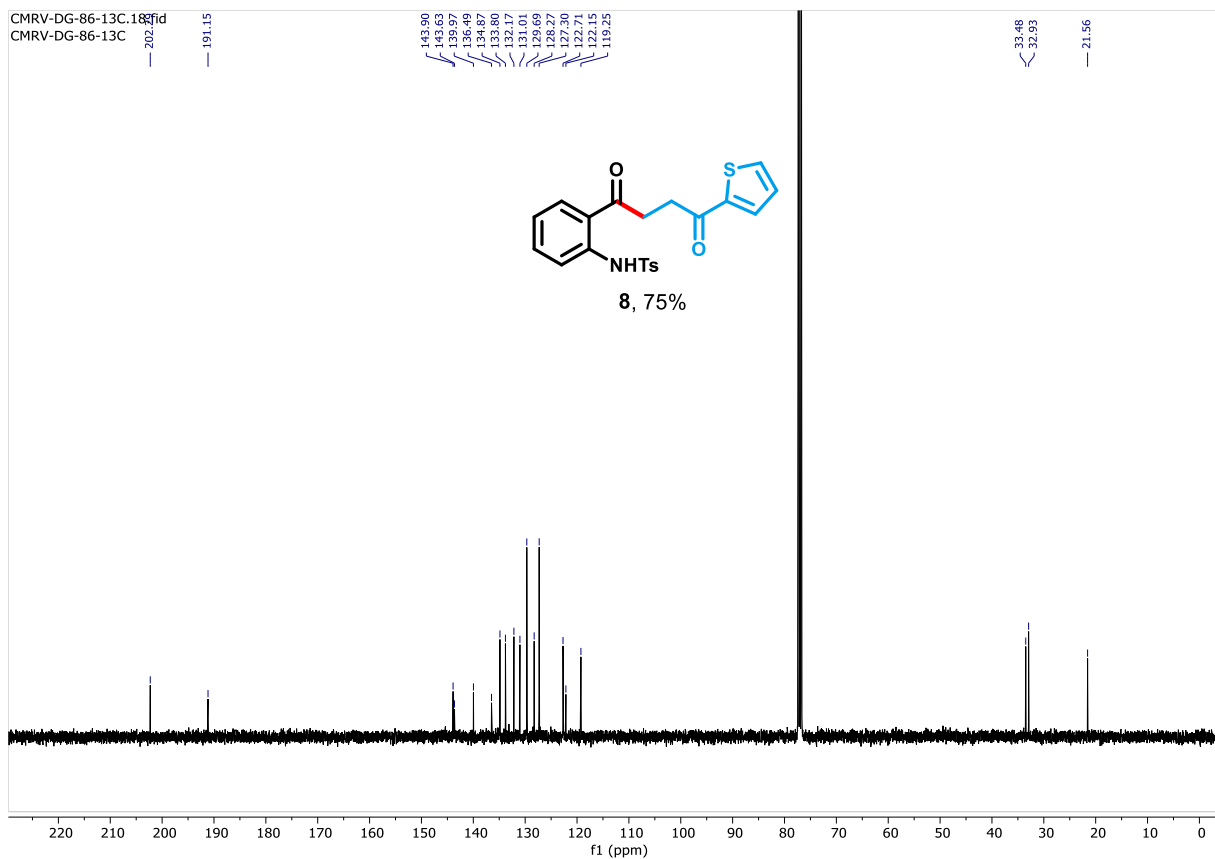

9

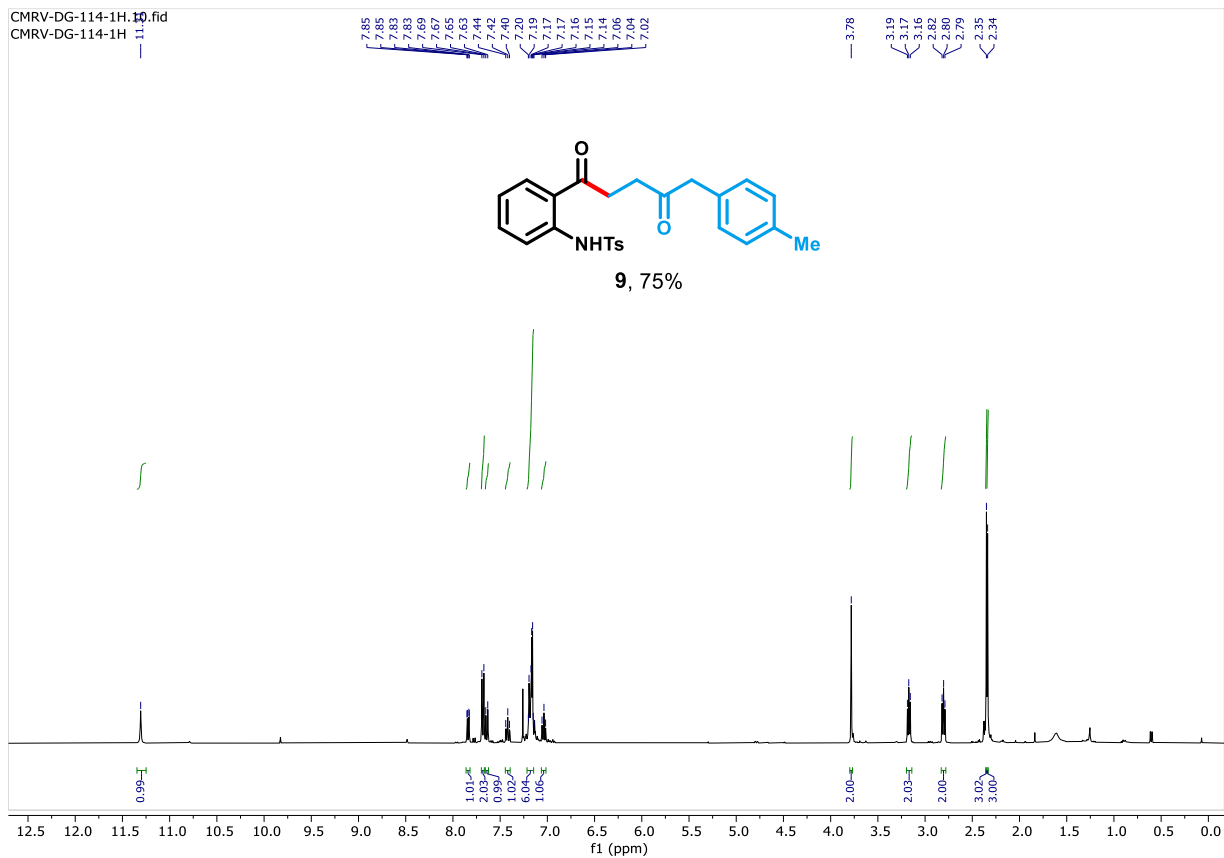

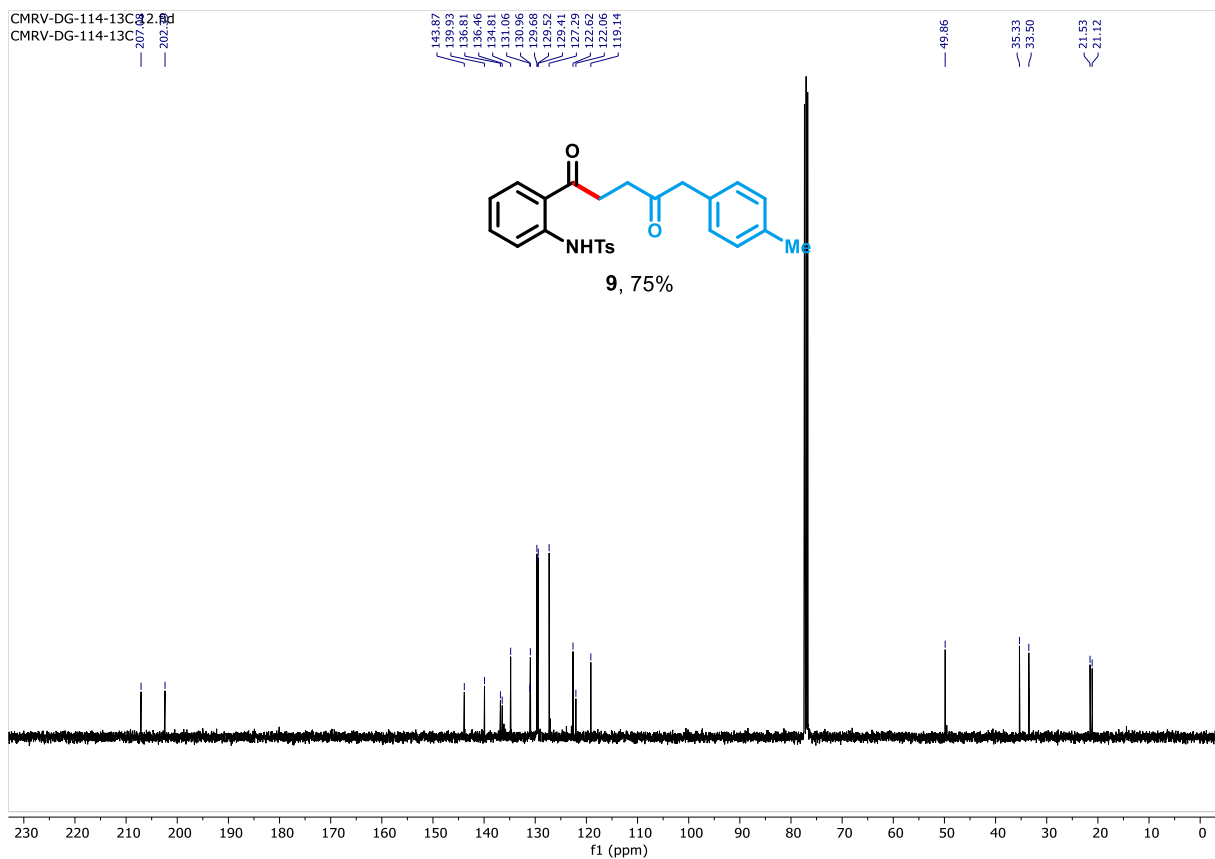

## 10

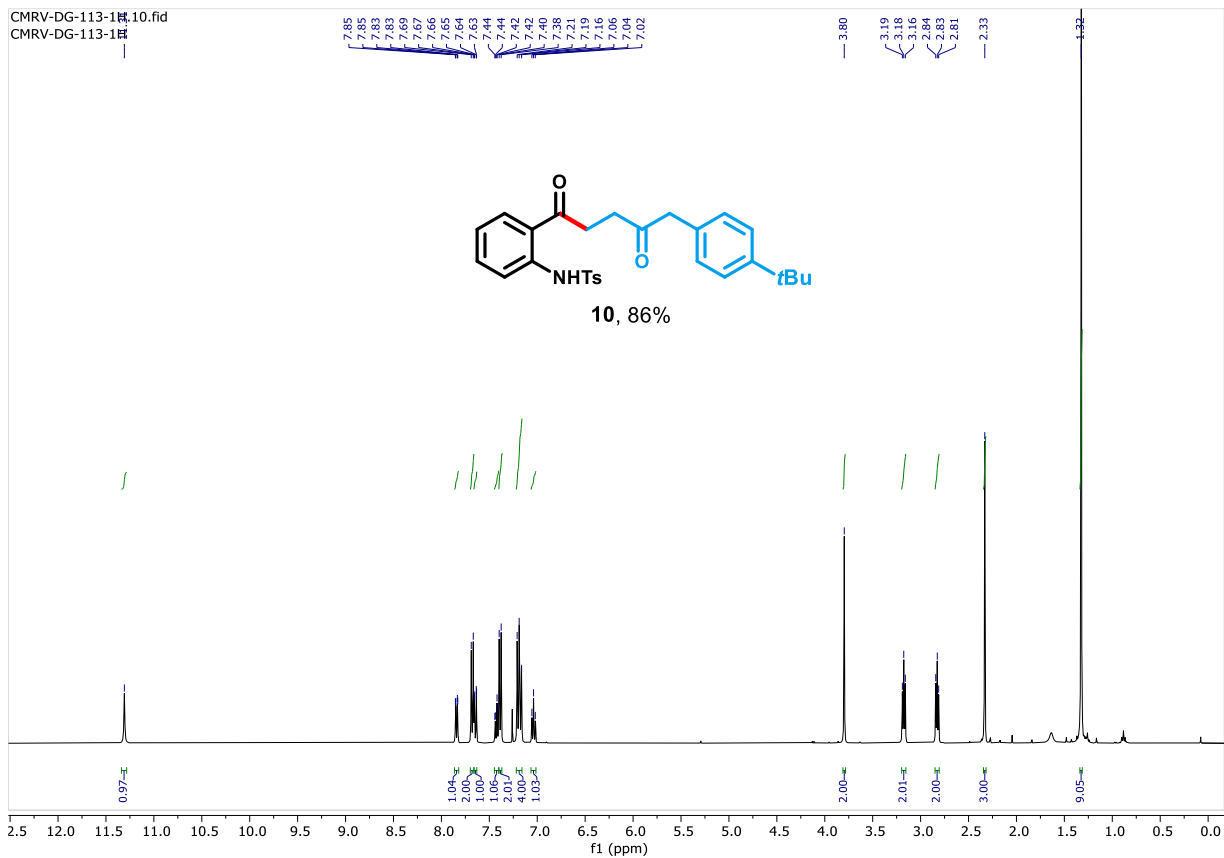

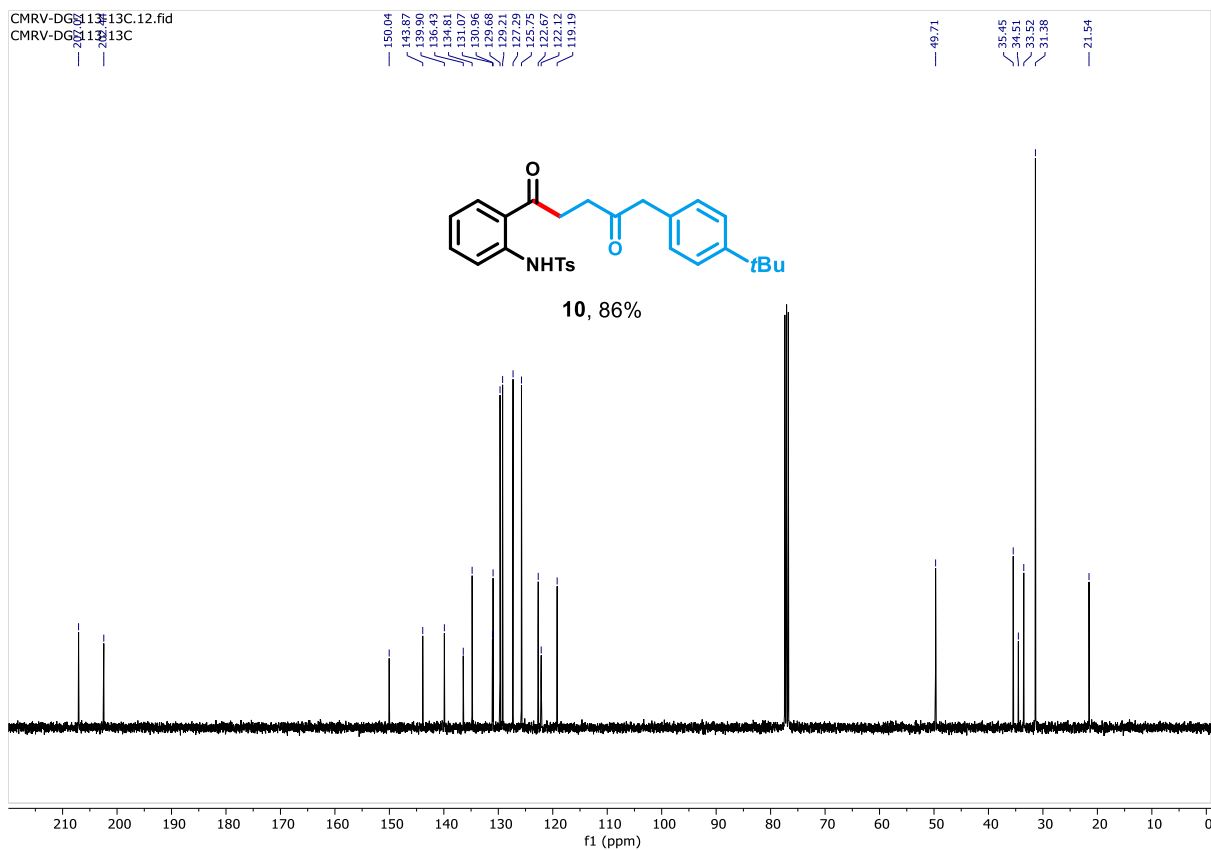

## 11

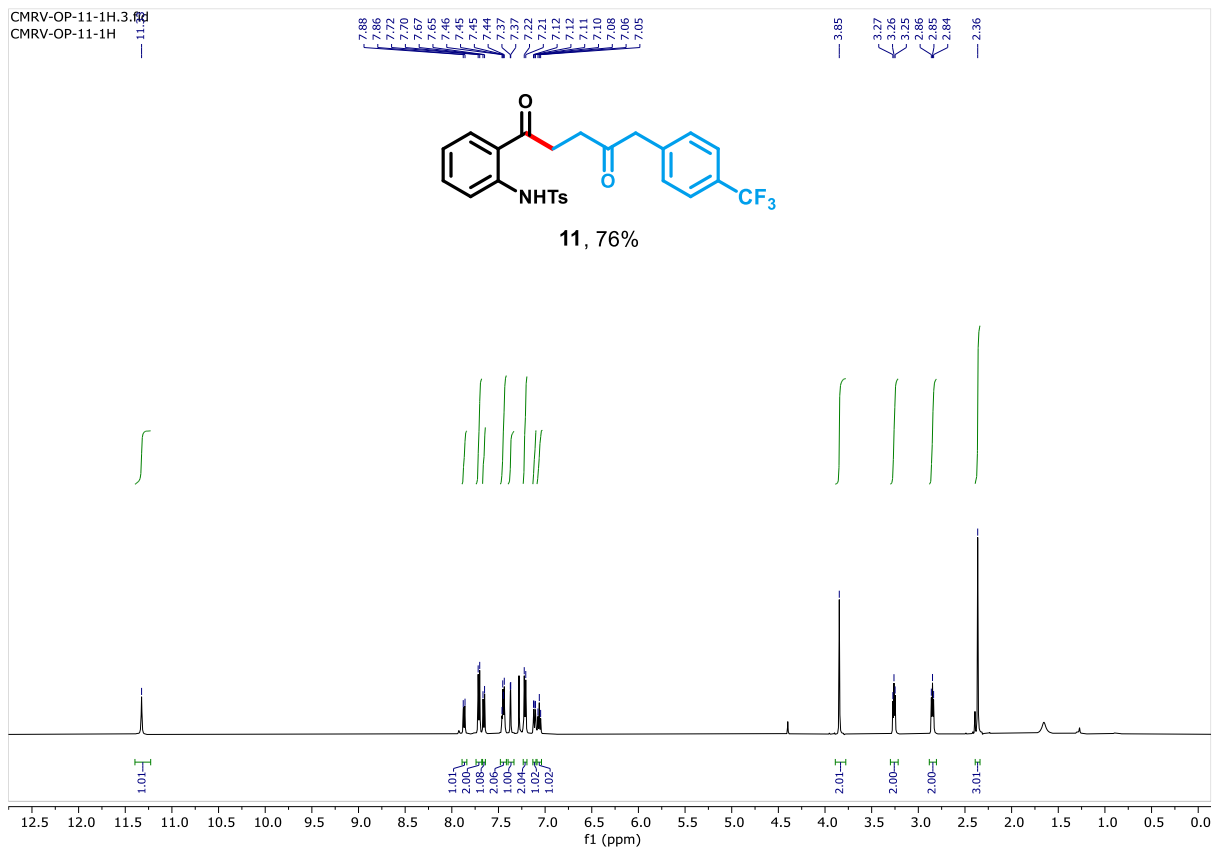

CMRV-OP-11-13C.4.fid  
CMRV-OP-11-13C

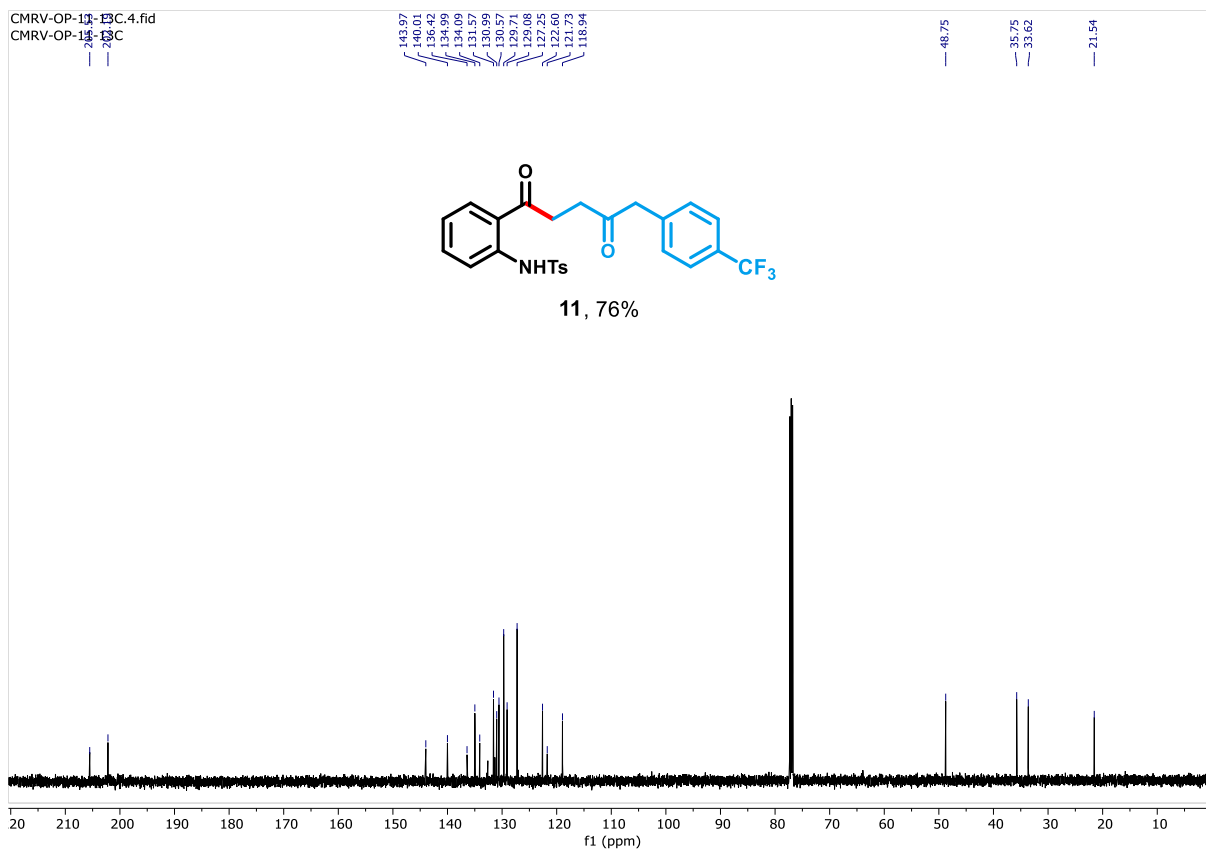

CMRV-DG-116-19F.1.fid  
CMRV-DG-116-19F

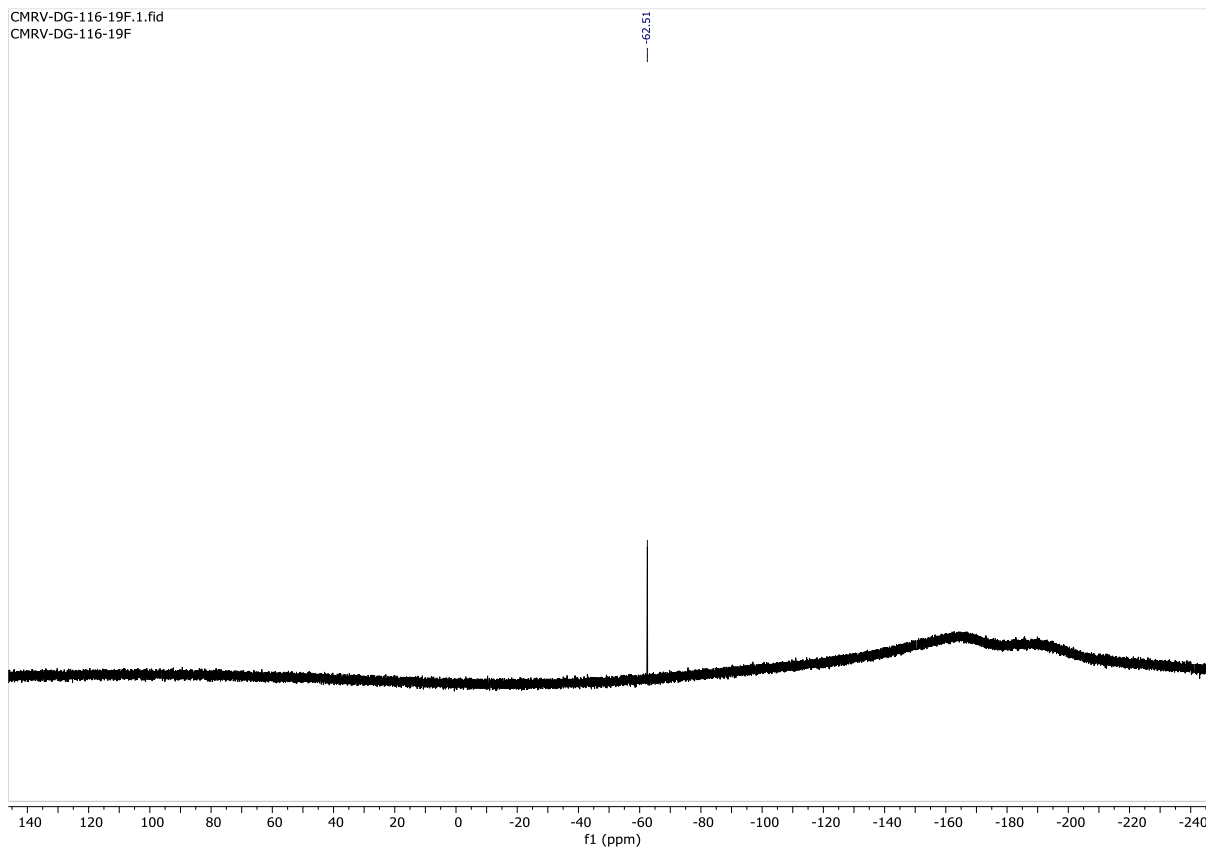

# 12

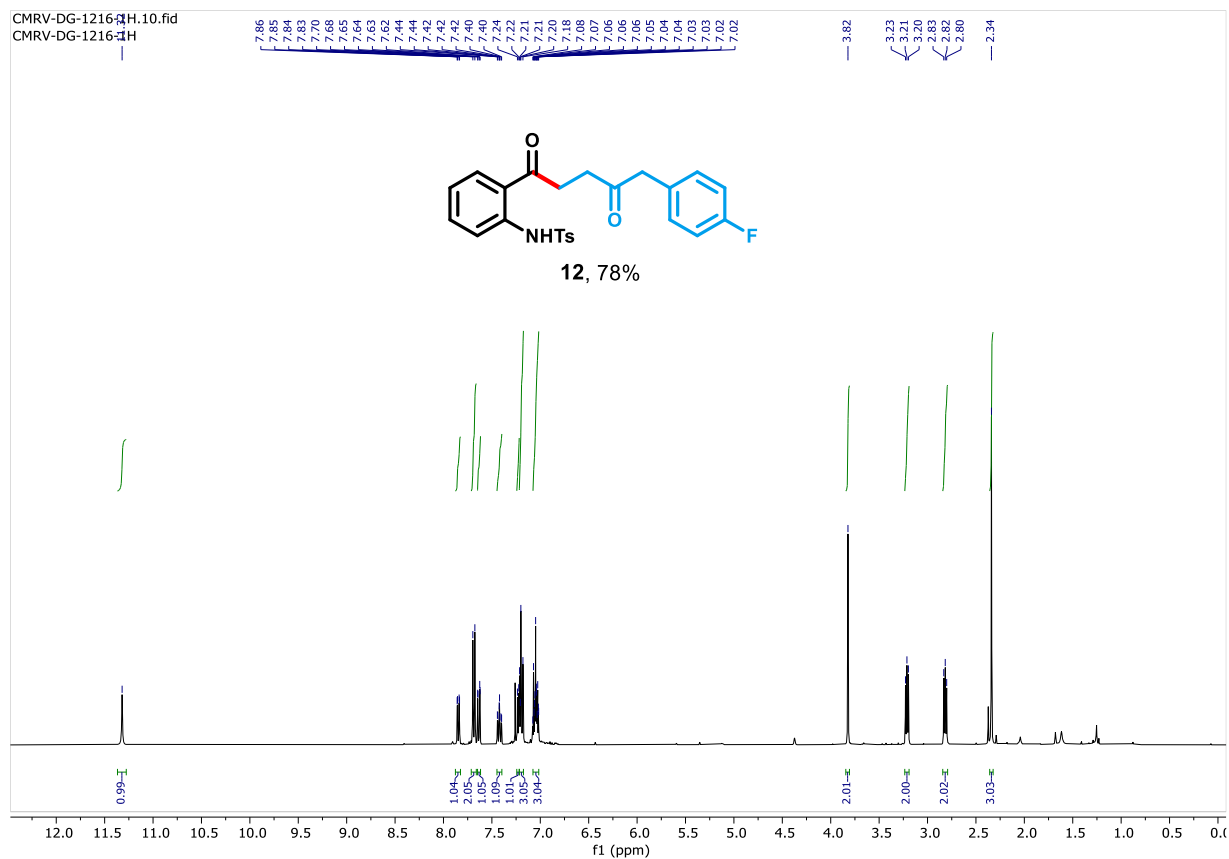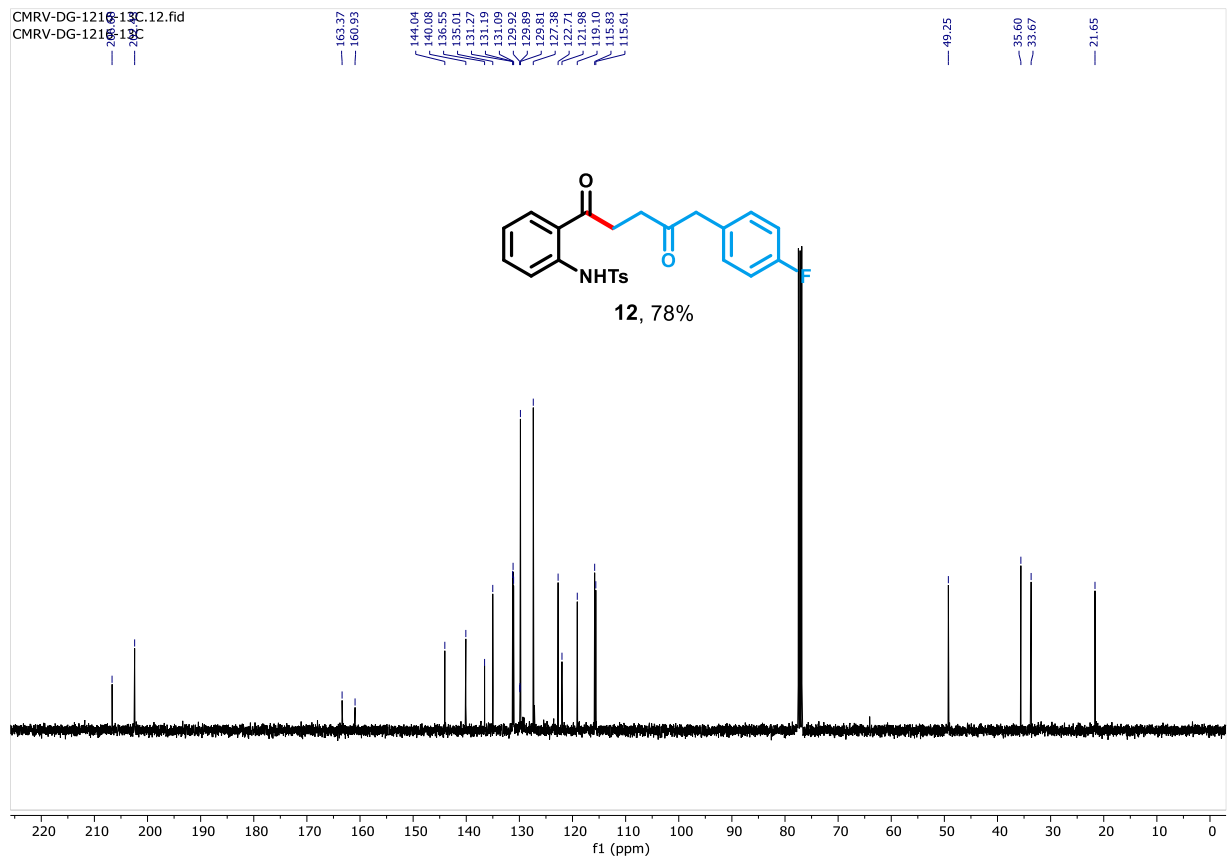

# 13

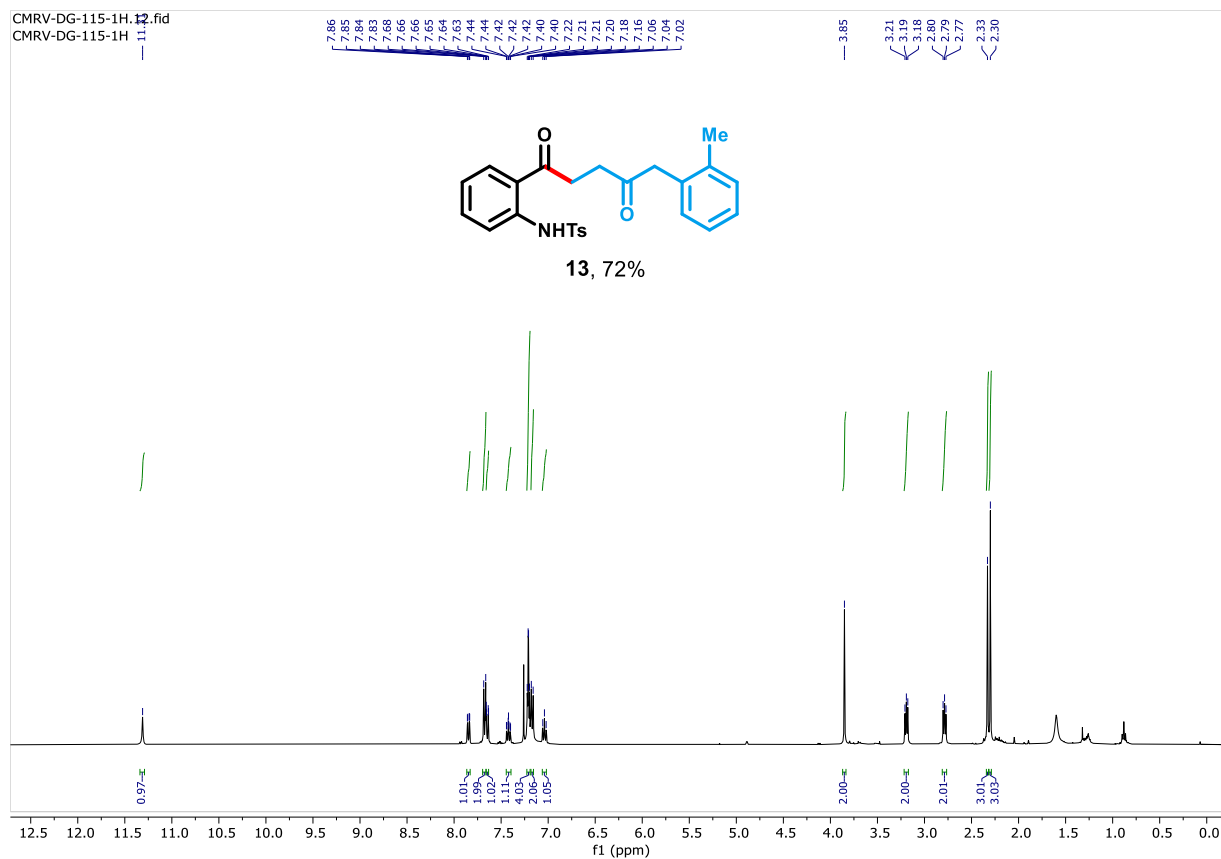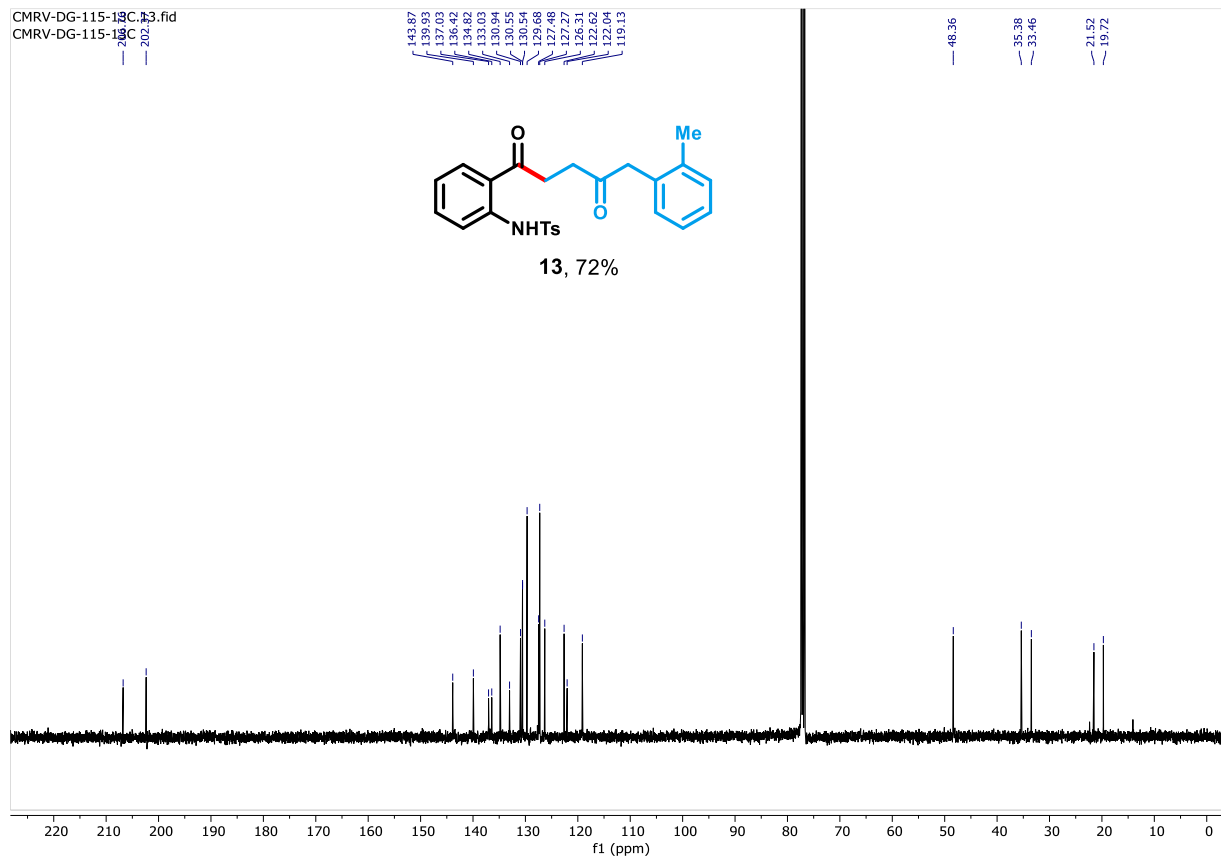

# 14

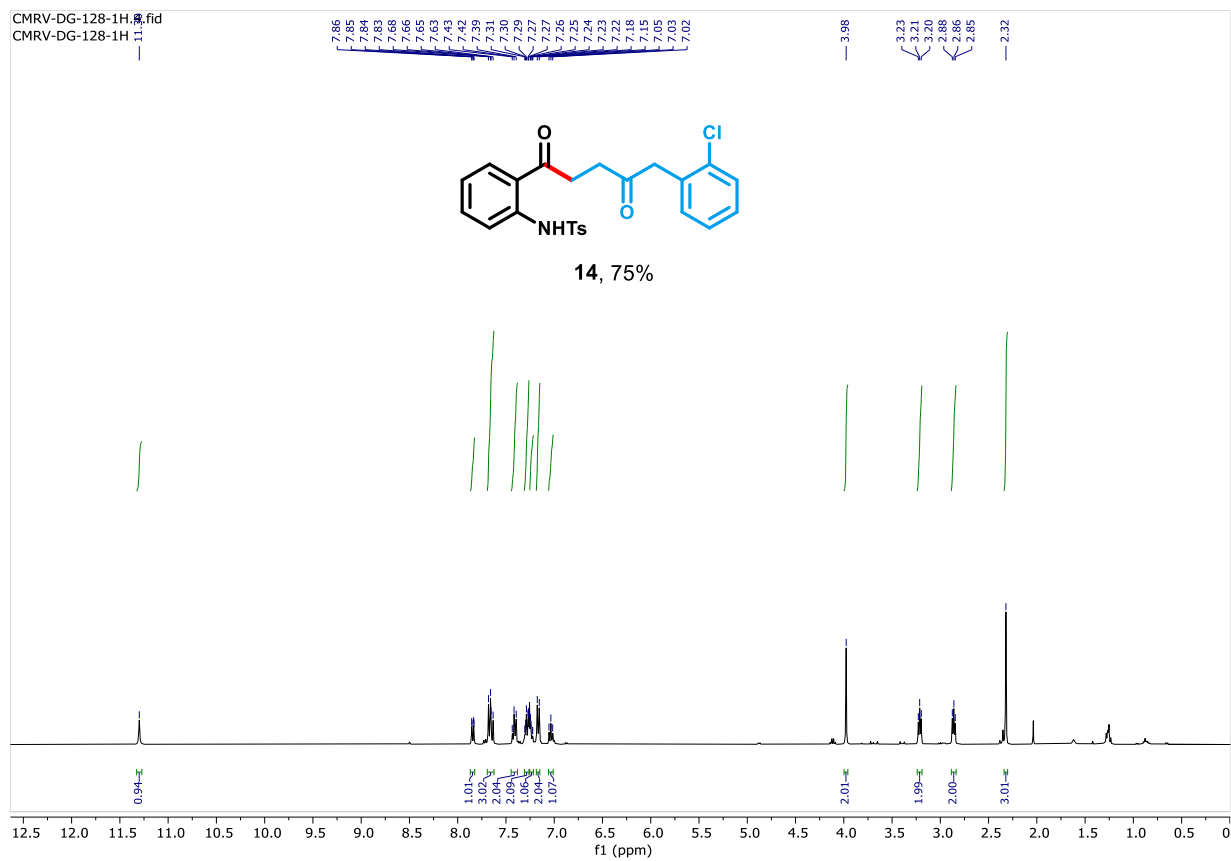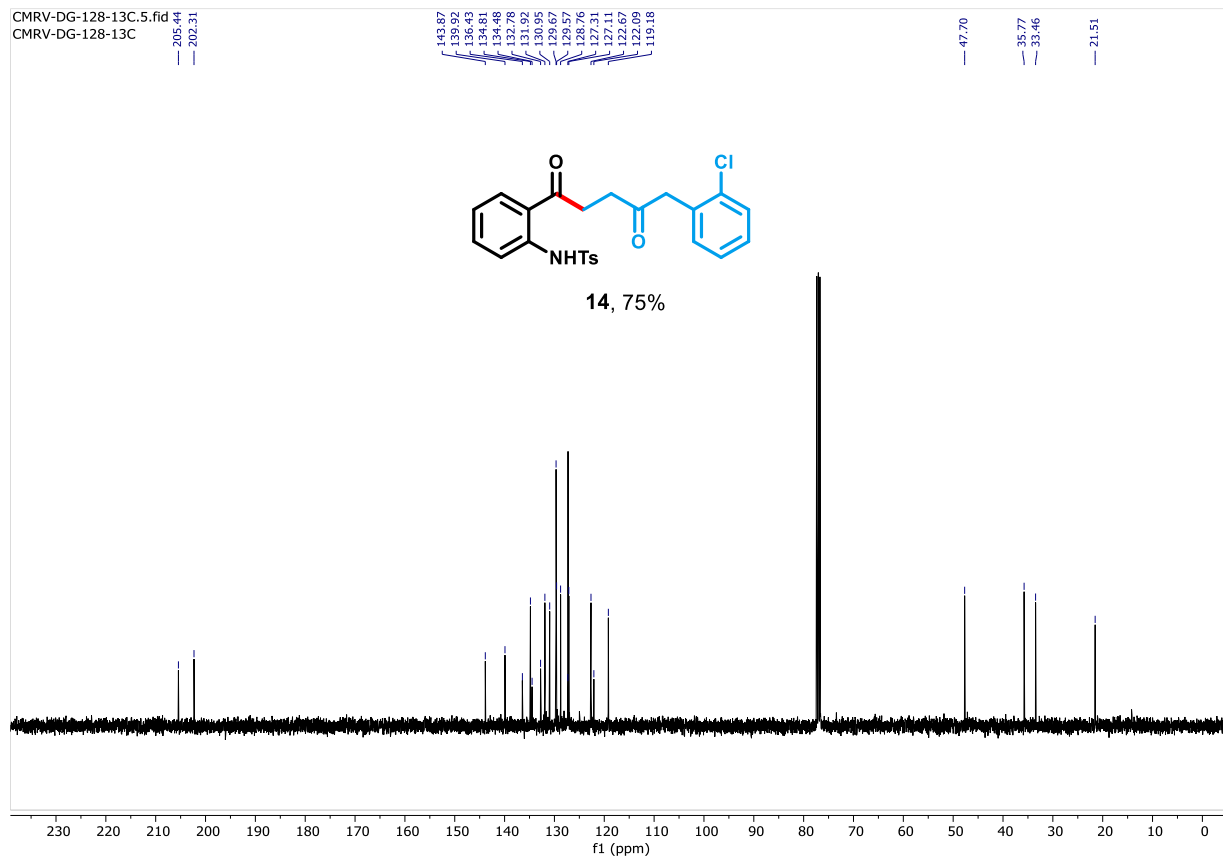

15

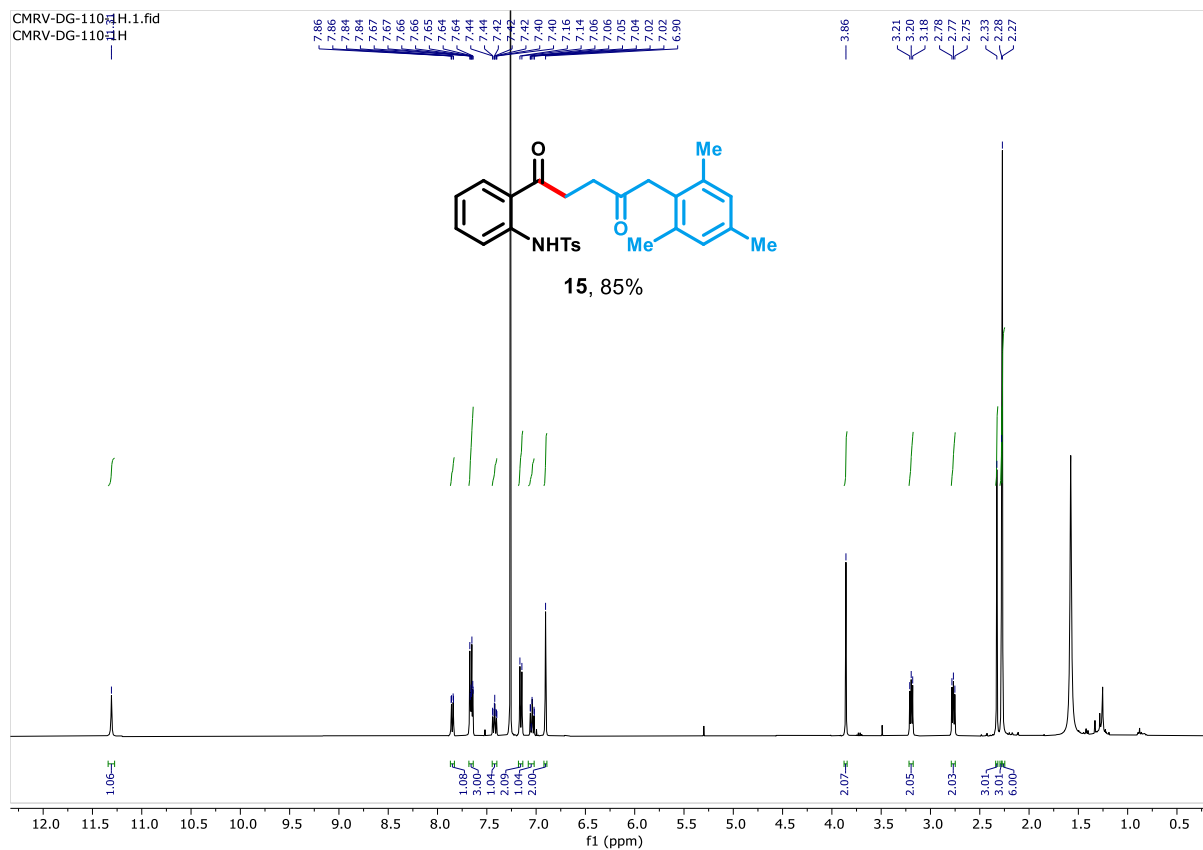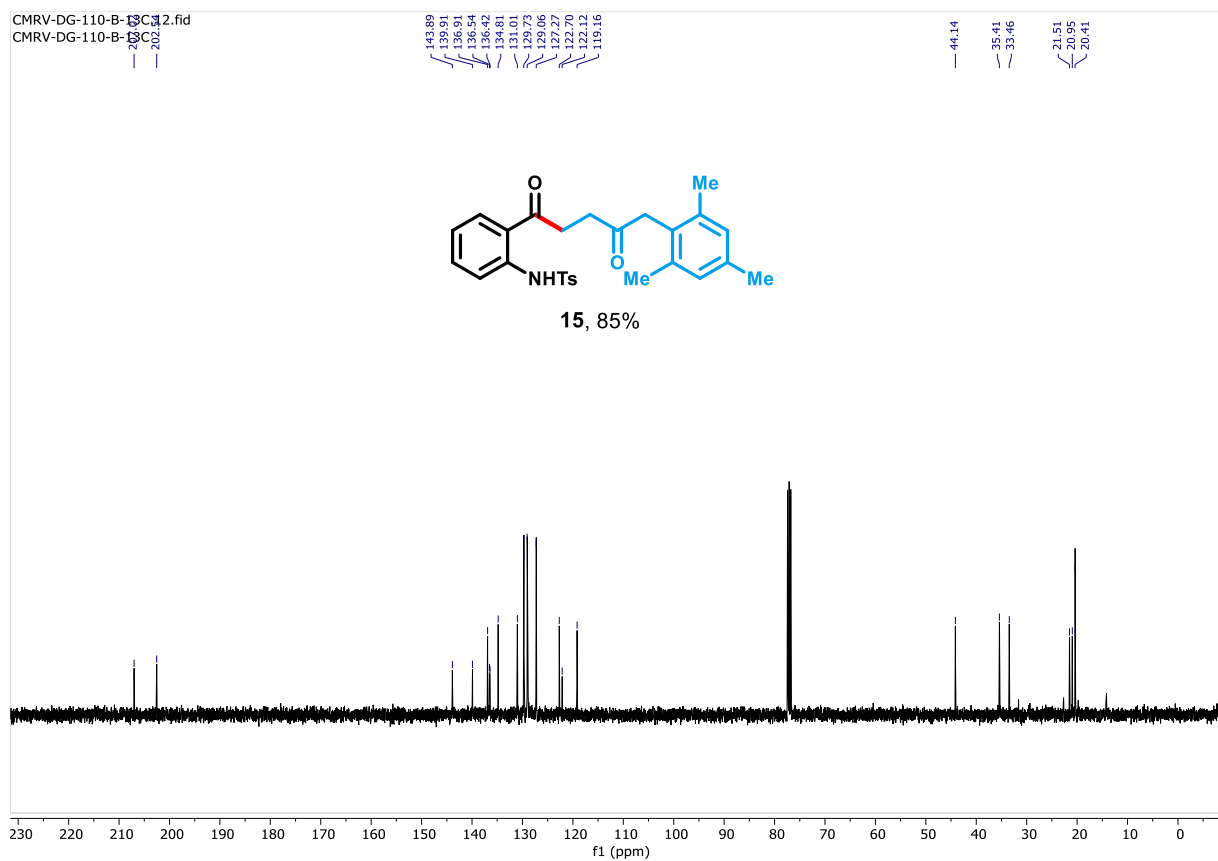



# 16

CMRV-DG-125-1H.10.fid  
CMRV-DG-125-1H

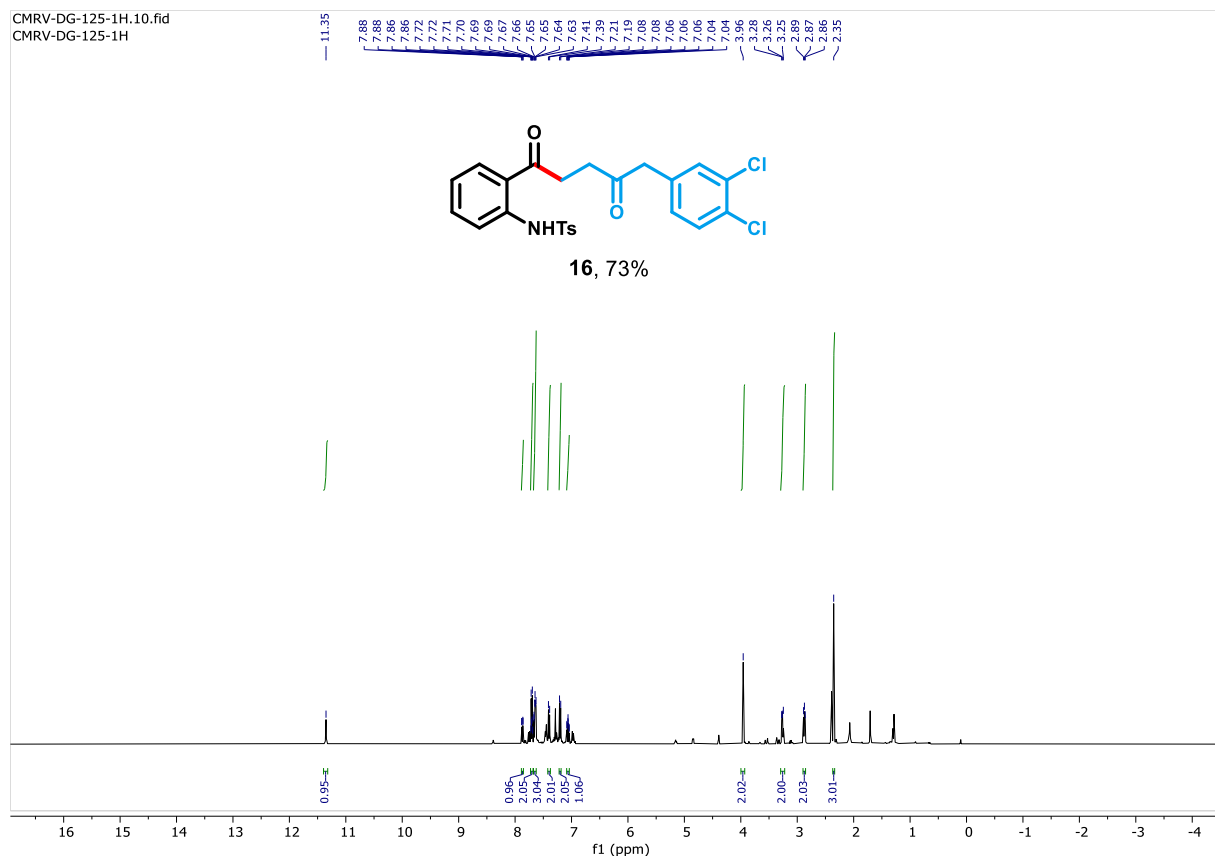

CMRV-DG-125-13C.12.fid  
CMRV-DG-125-13C

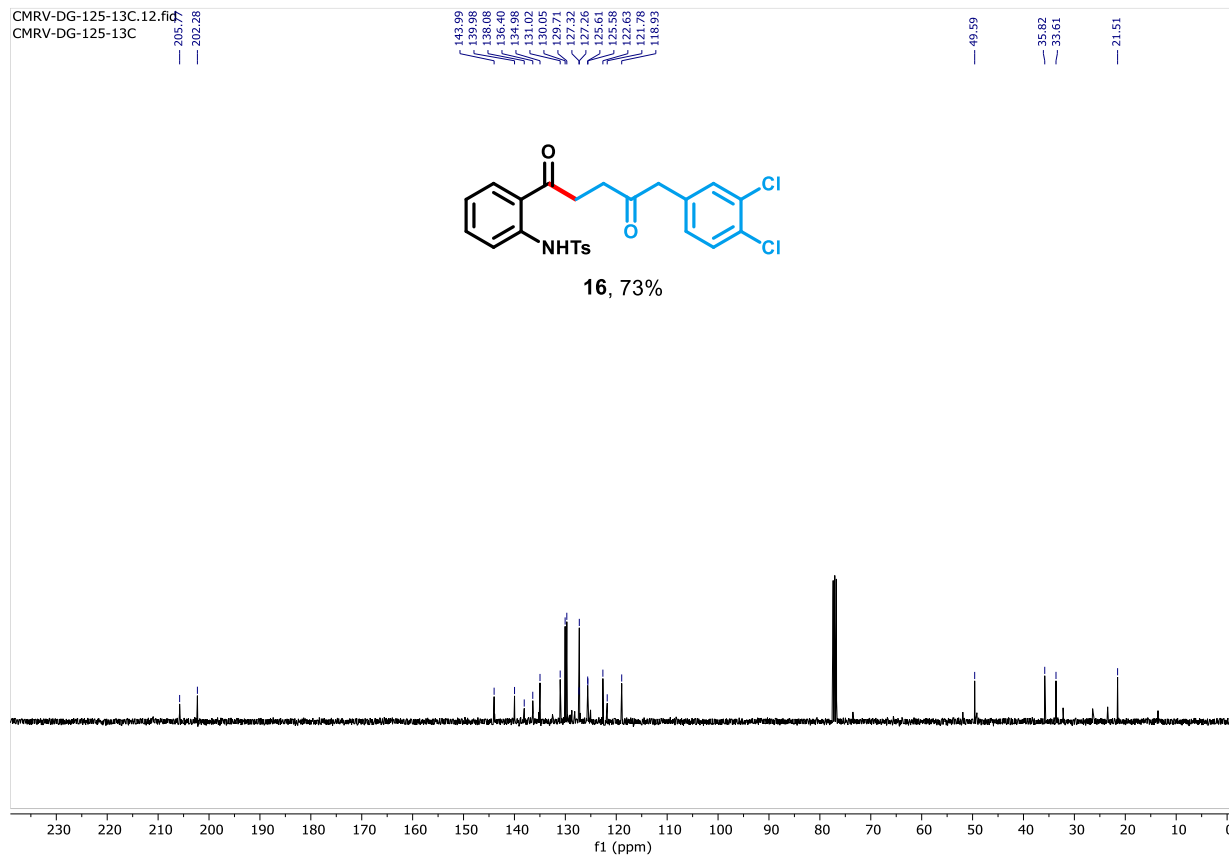

17

CMRV-DG-120-1H.10.fid  
CMRV-DG-120-1H

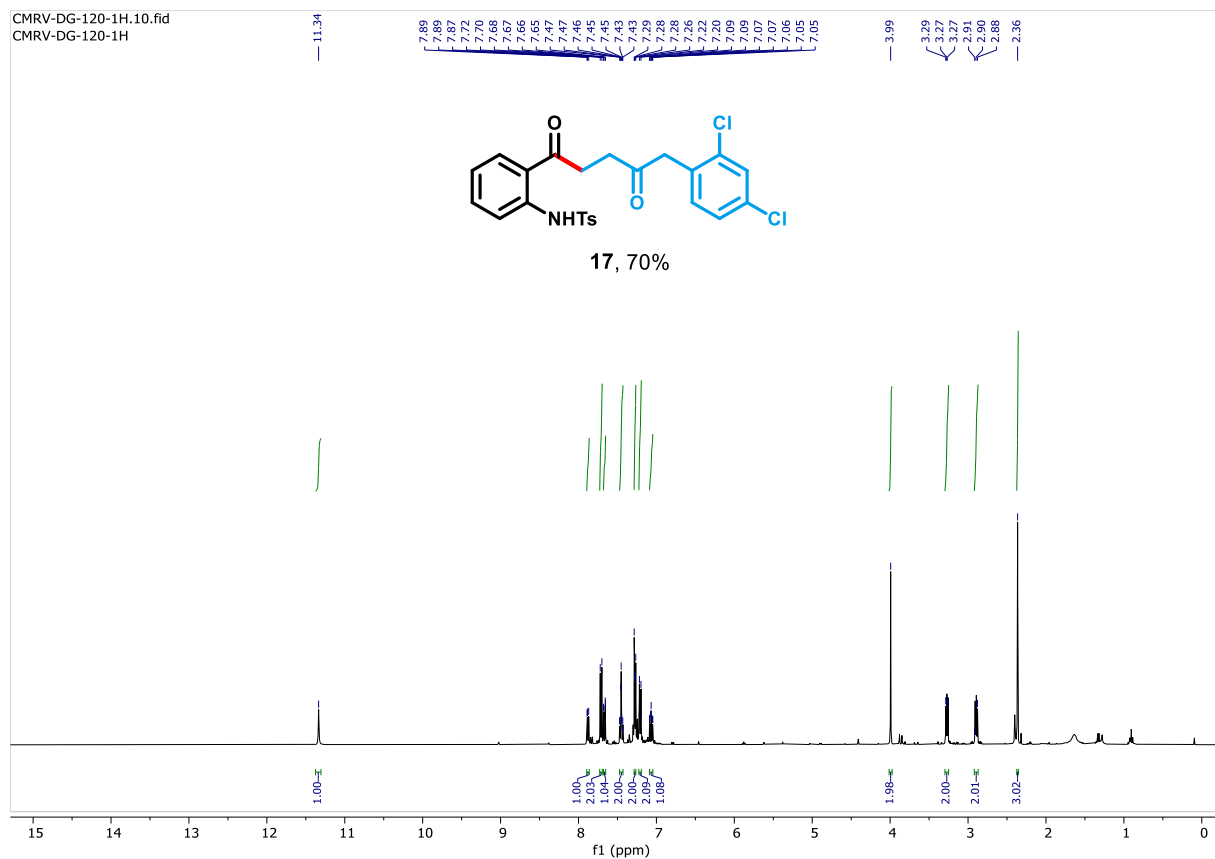

CMRV-DG-120-13C.12.fid  
CMRV-DG-120-13C

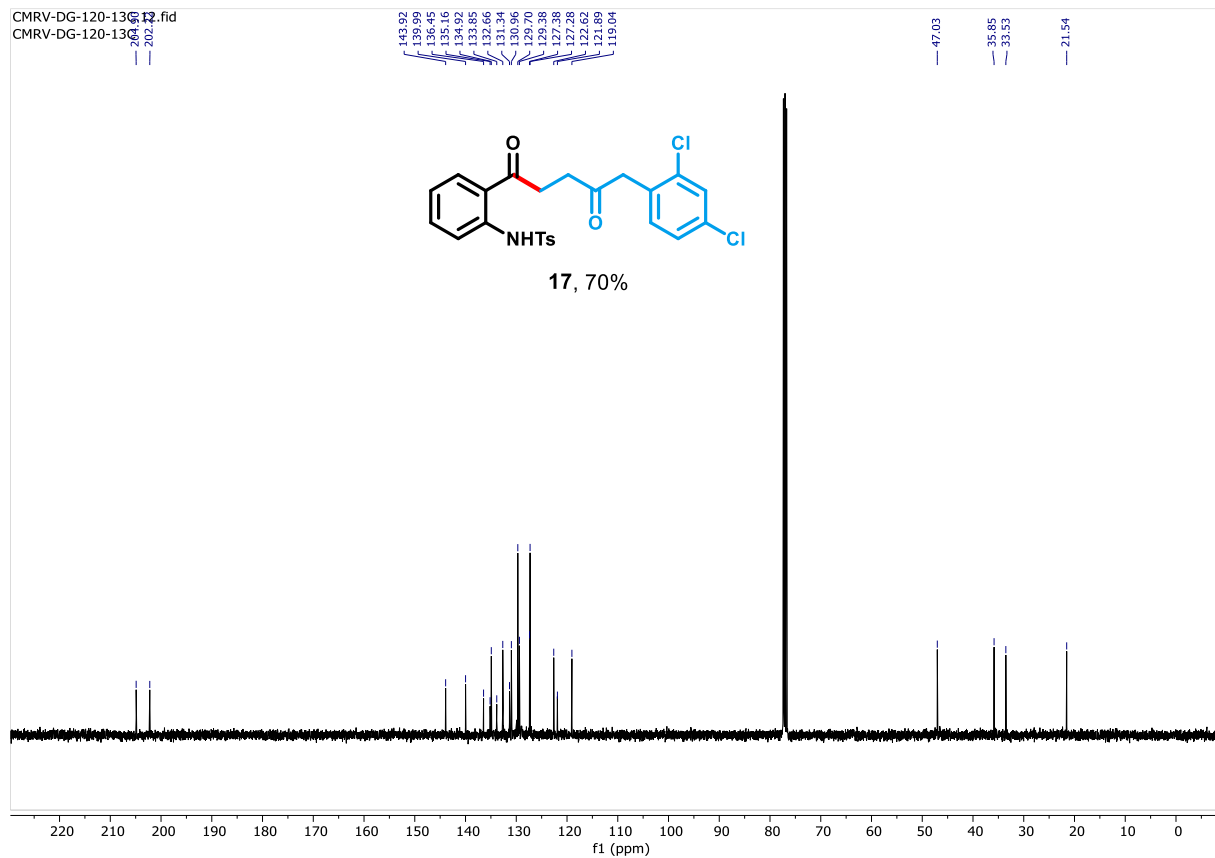



# 19

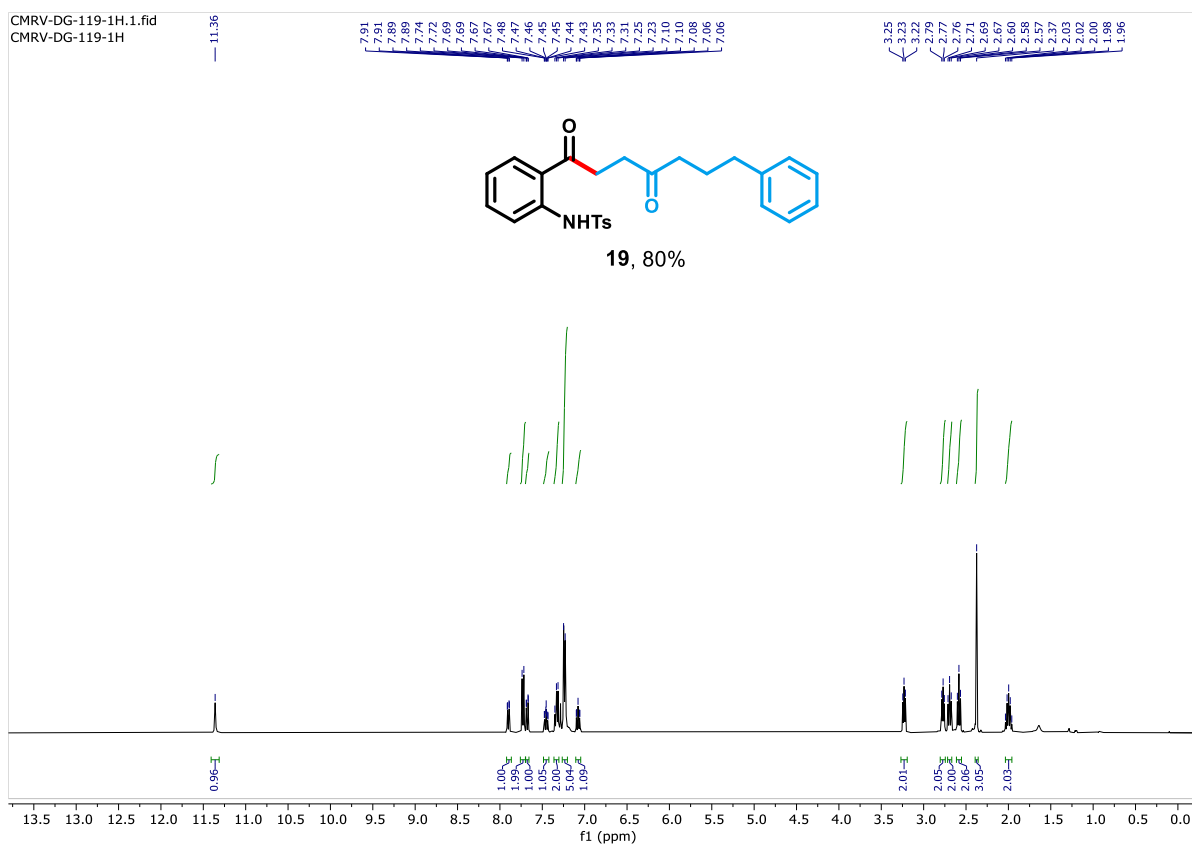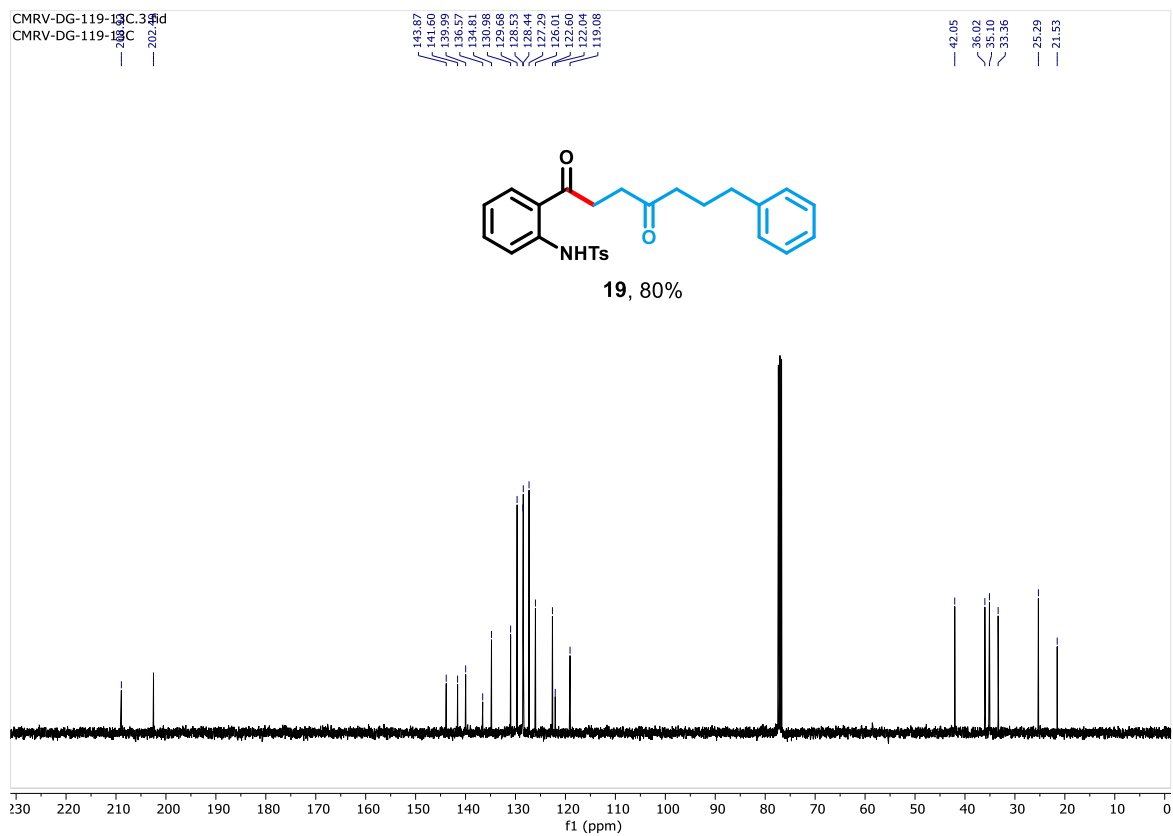



21

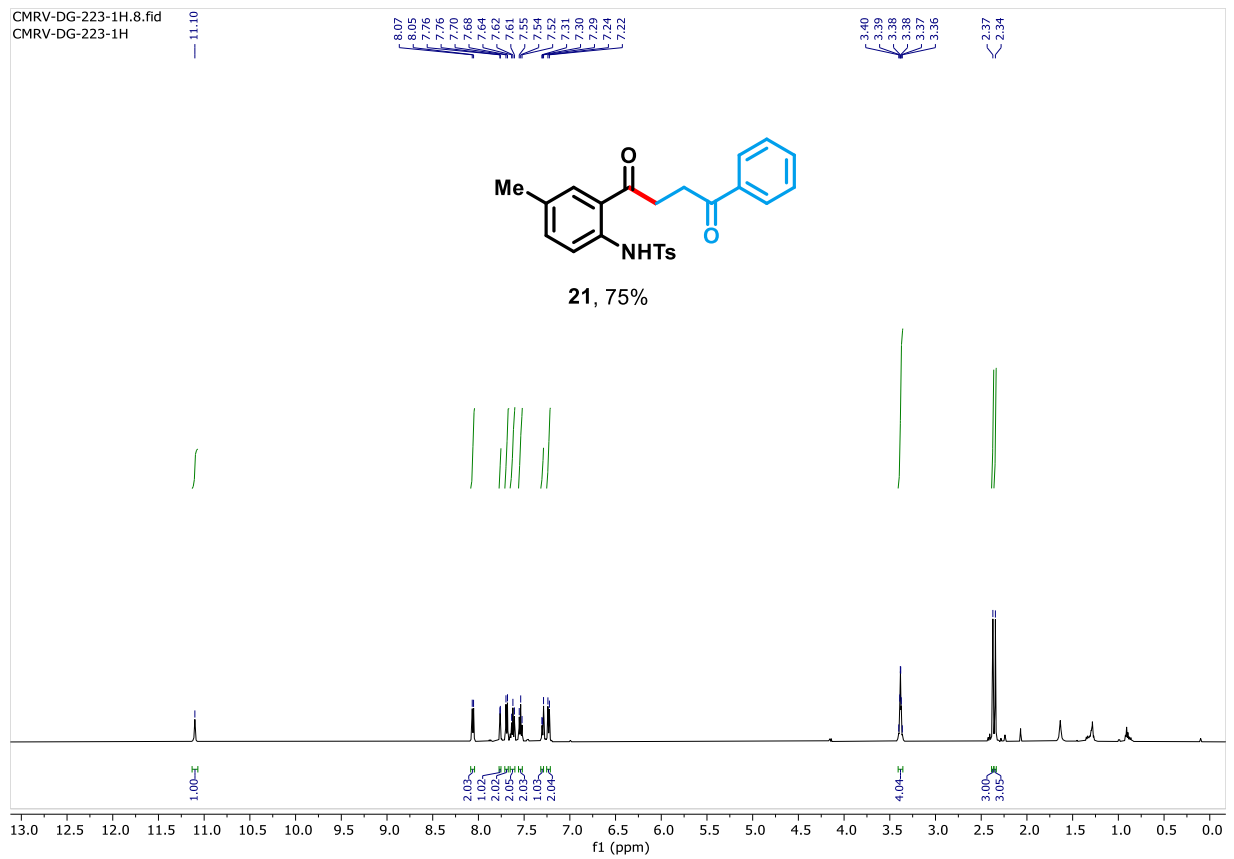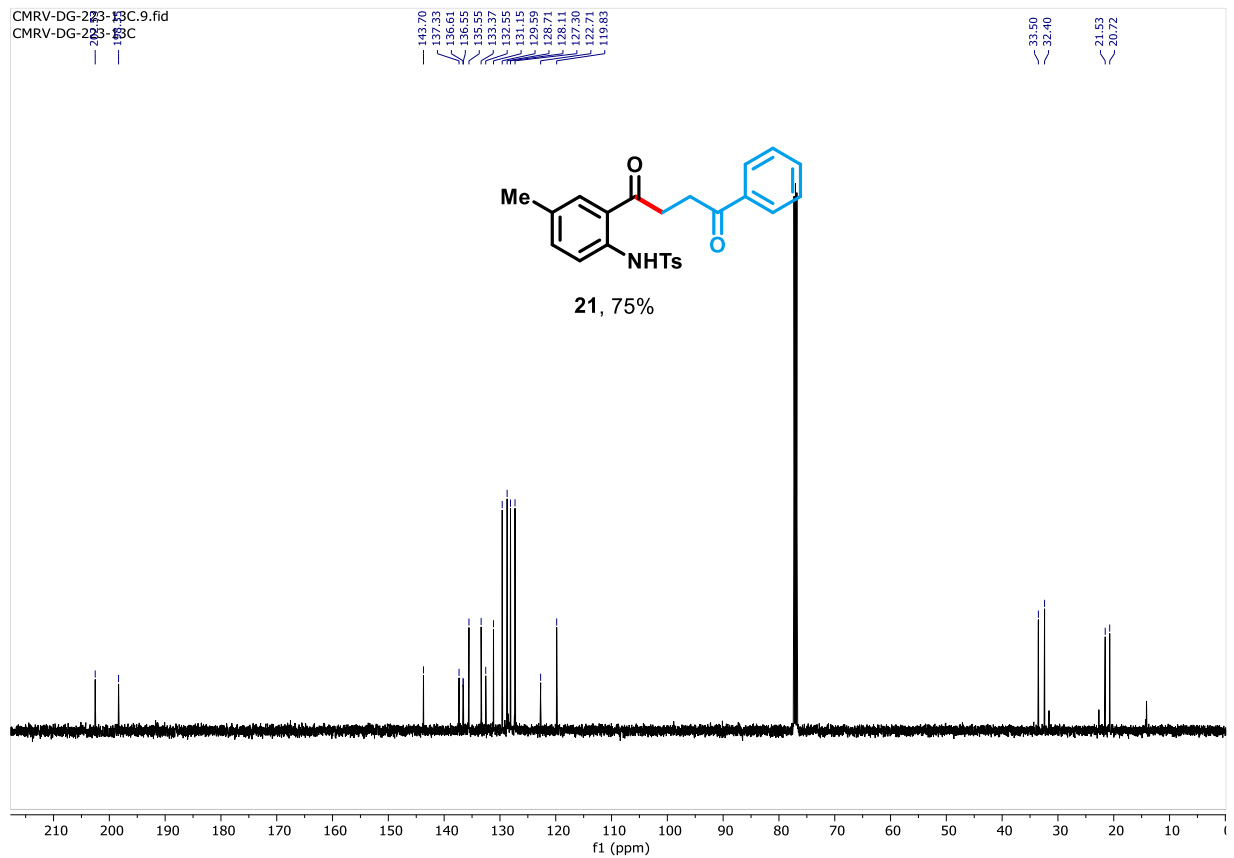

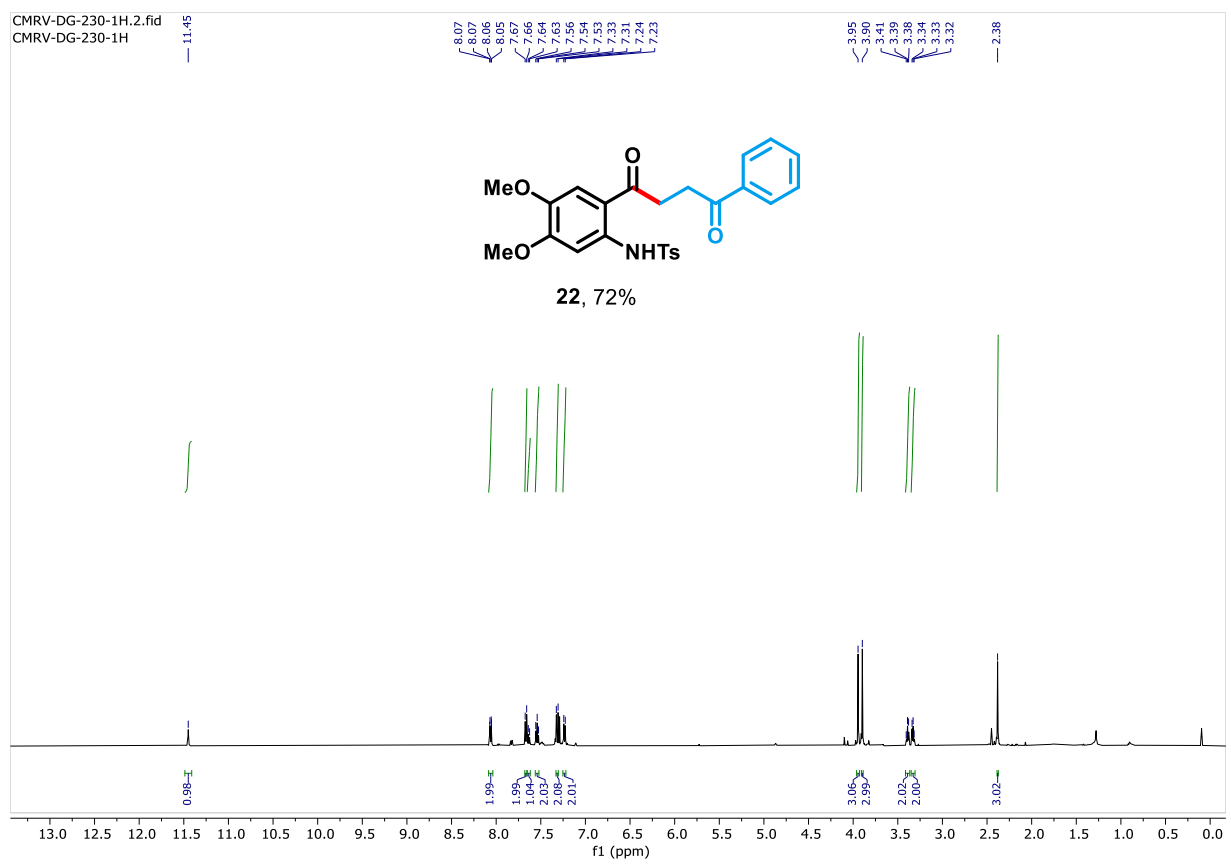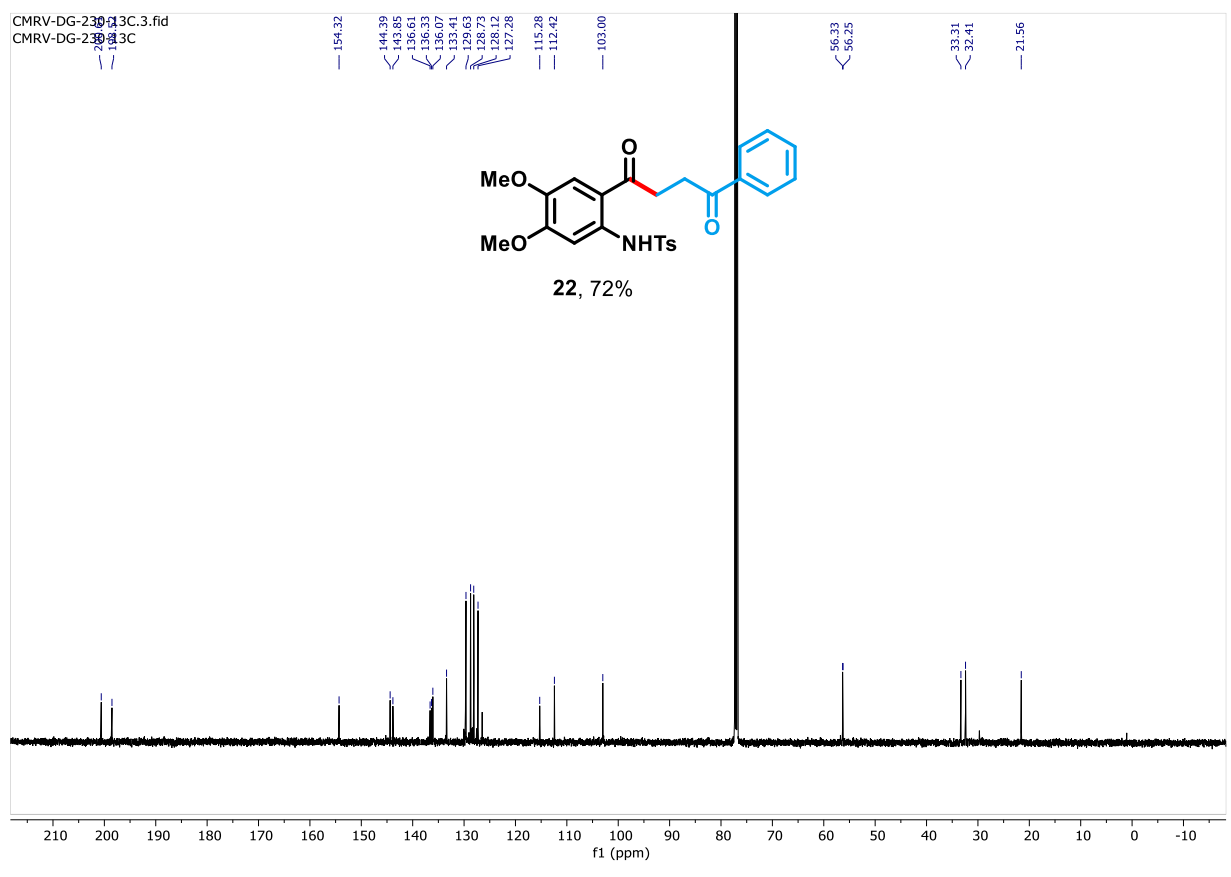

CMRV-DG-242-1H.10.fid  
CMRV-DG-242-1H

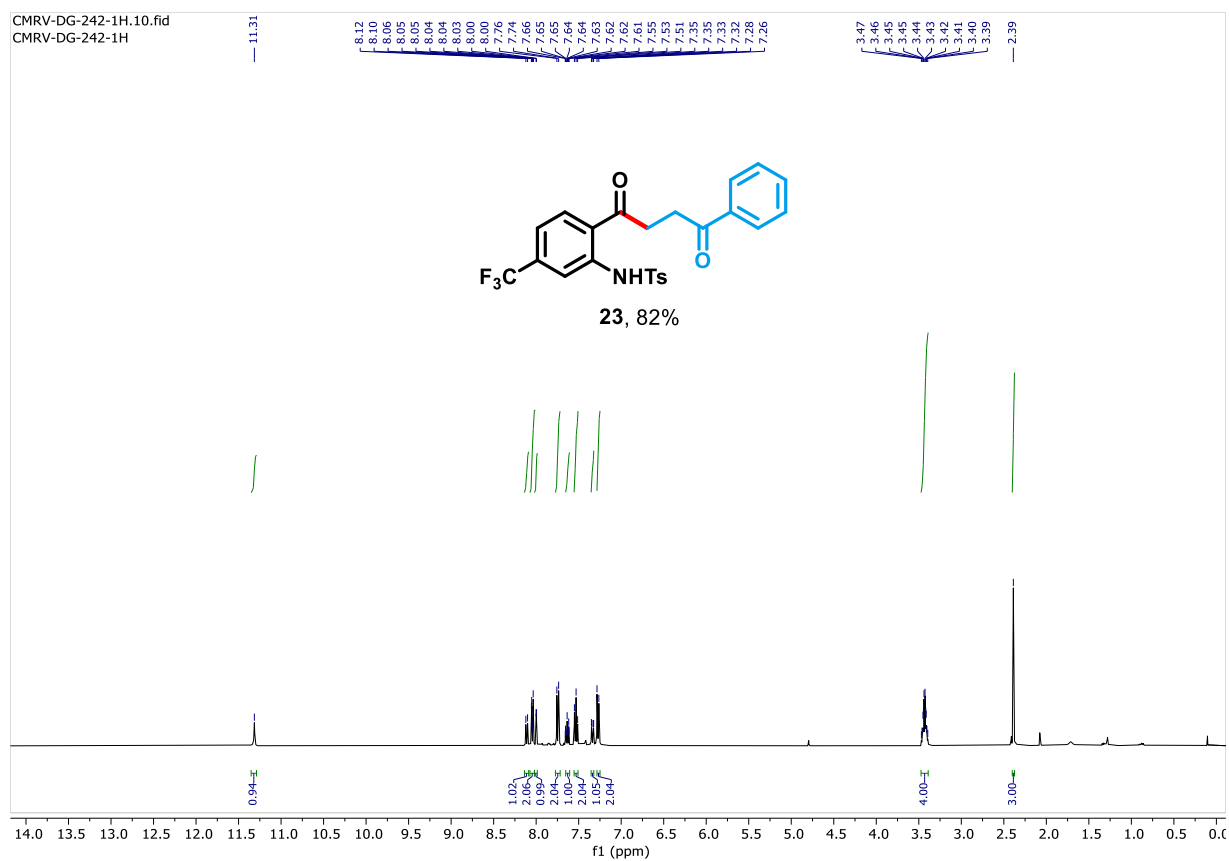

CMRV-DG-242-13C.13.fid  
CMRV-DG-242-13C

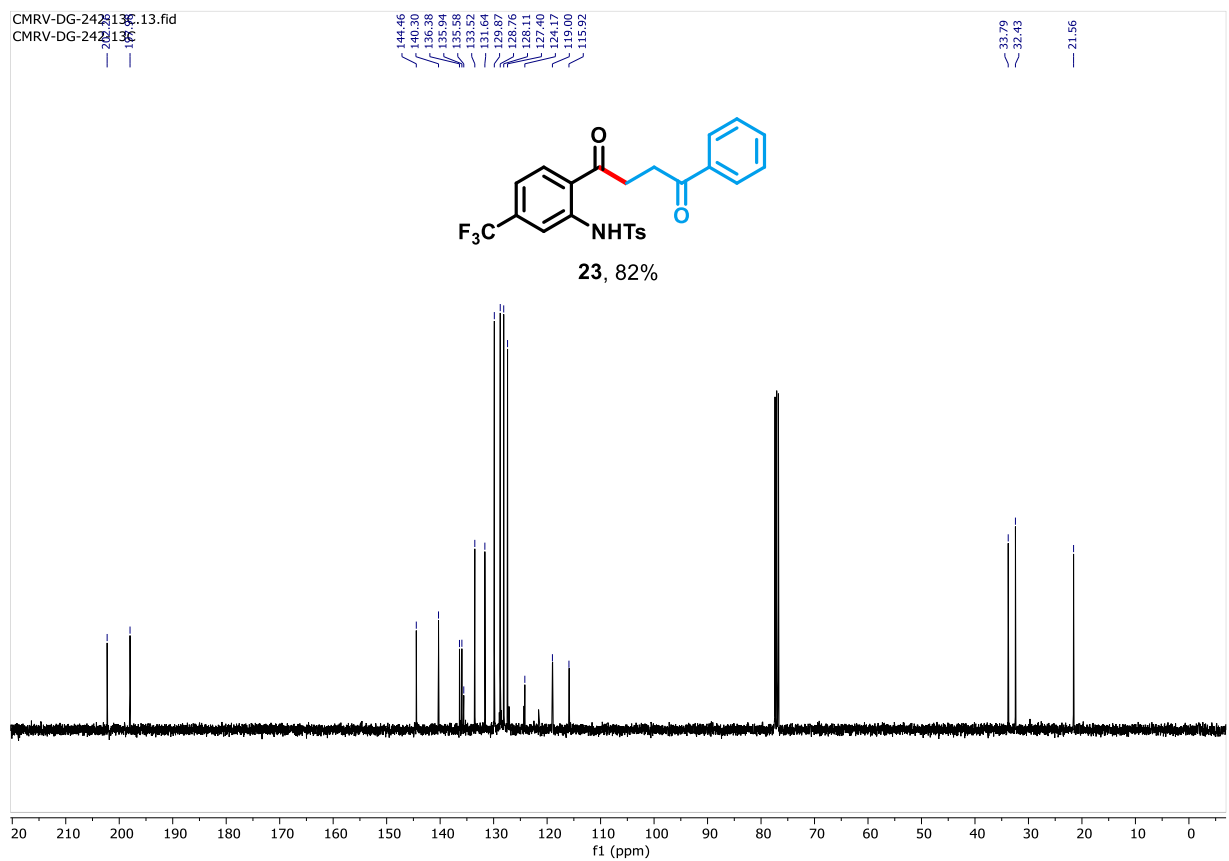



24

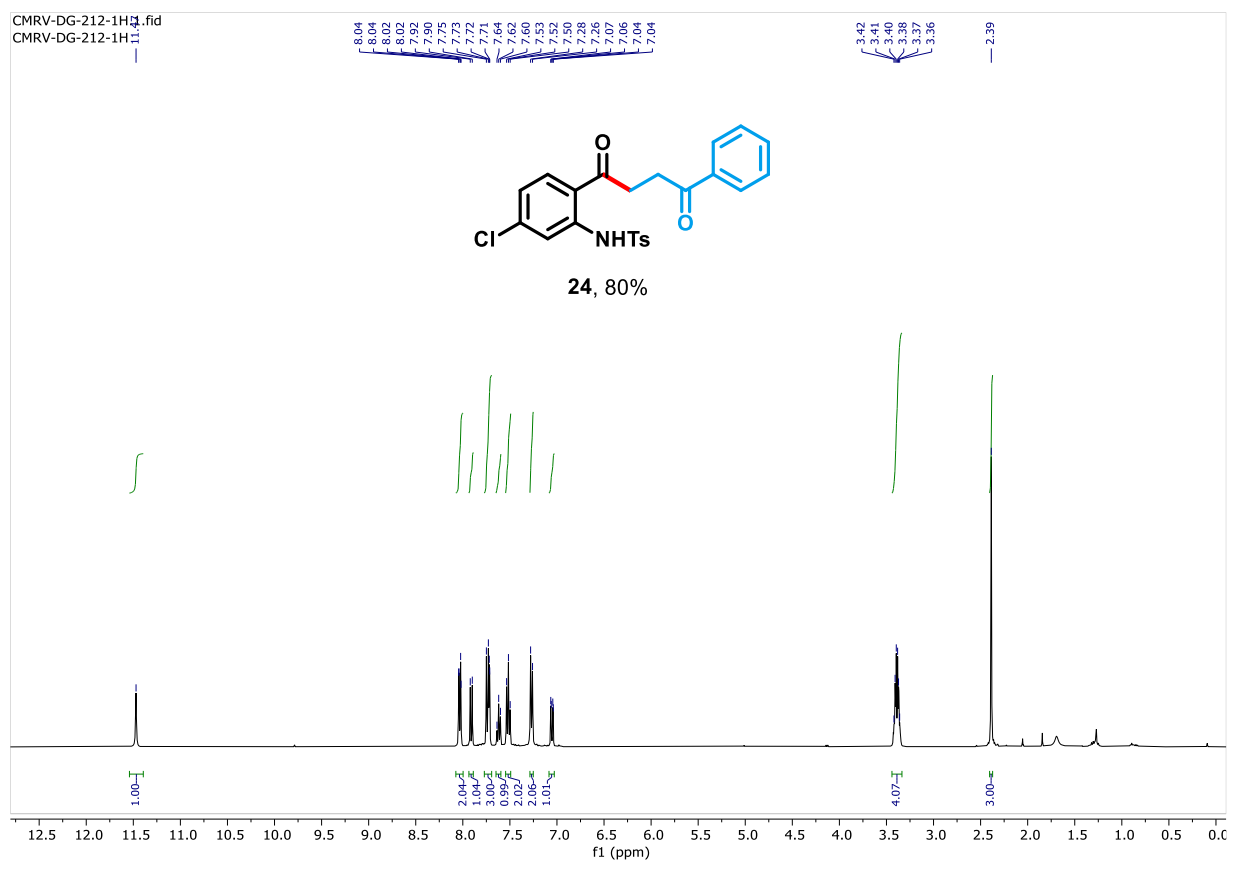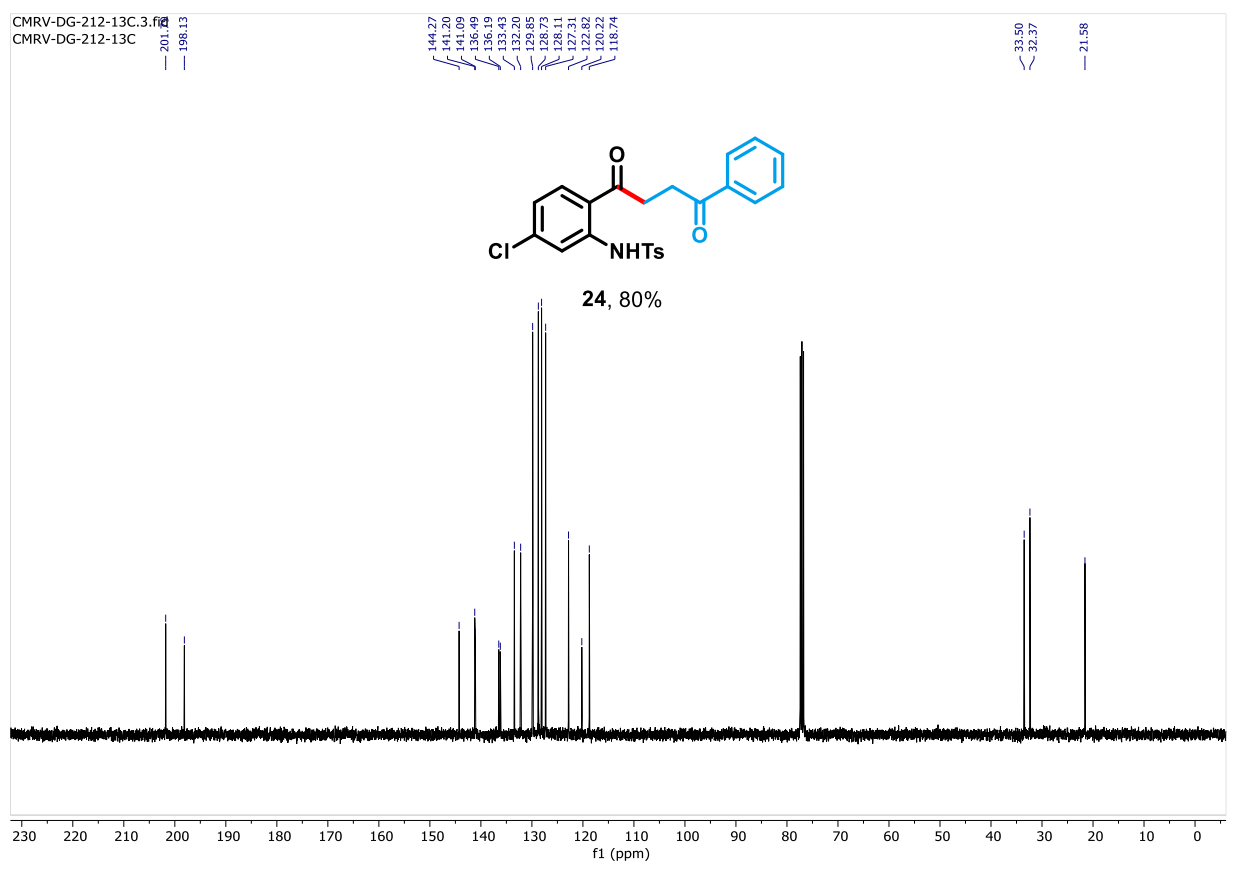

25

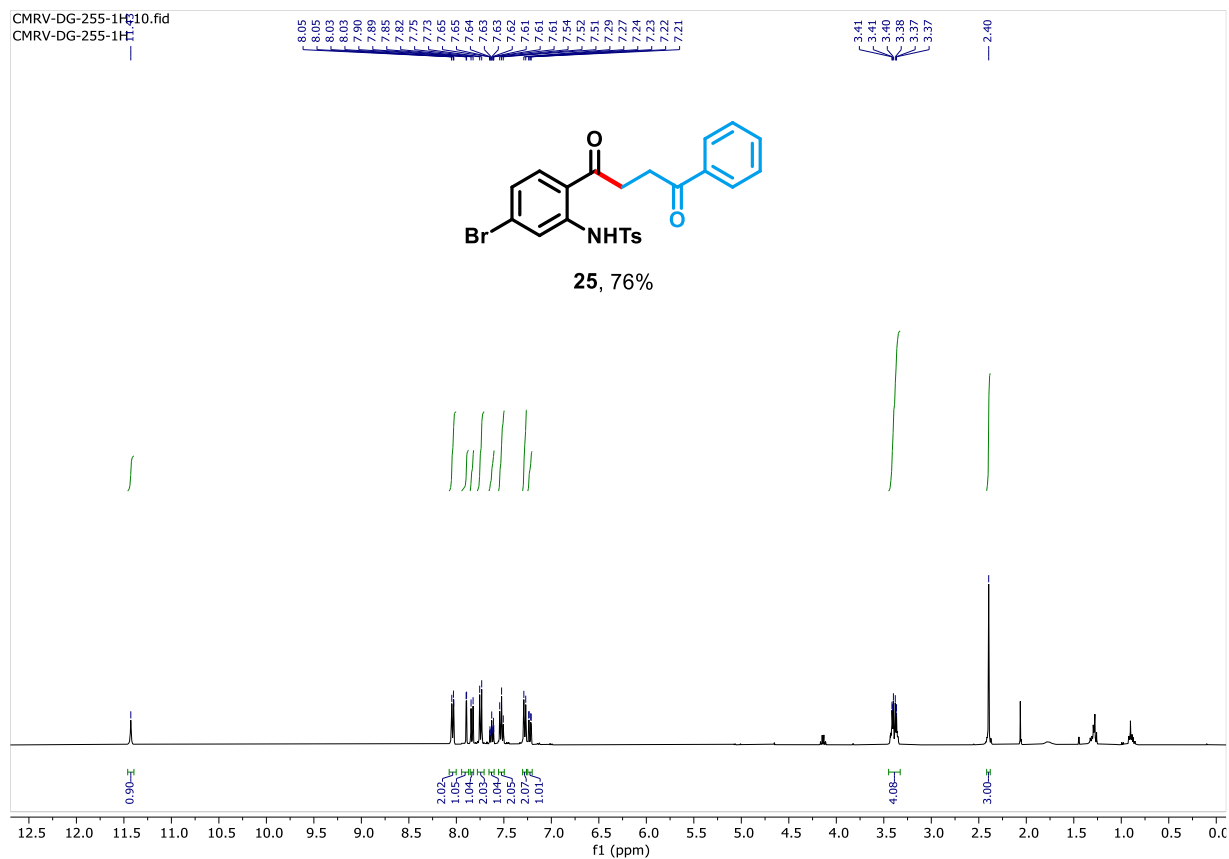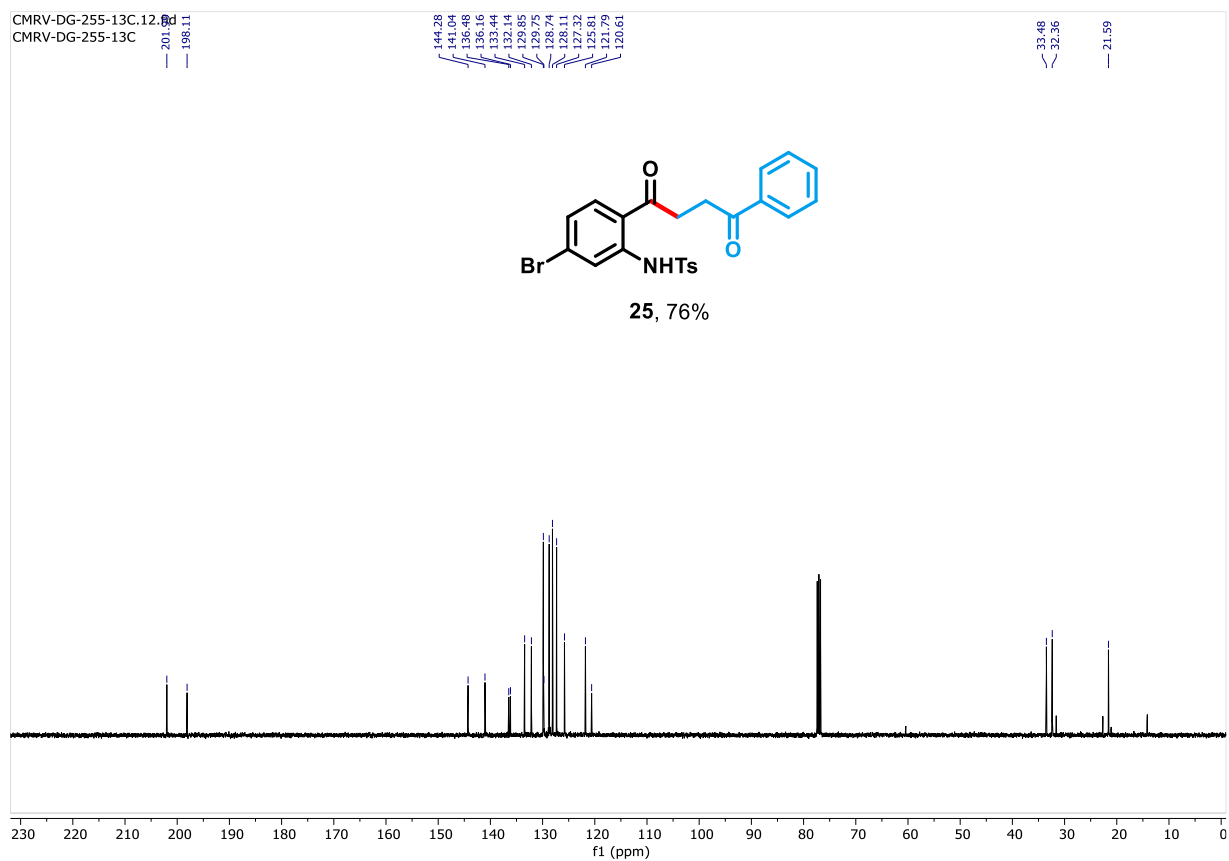

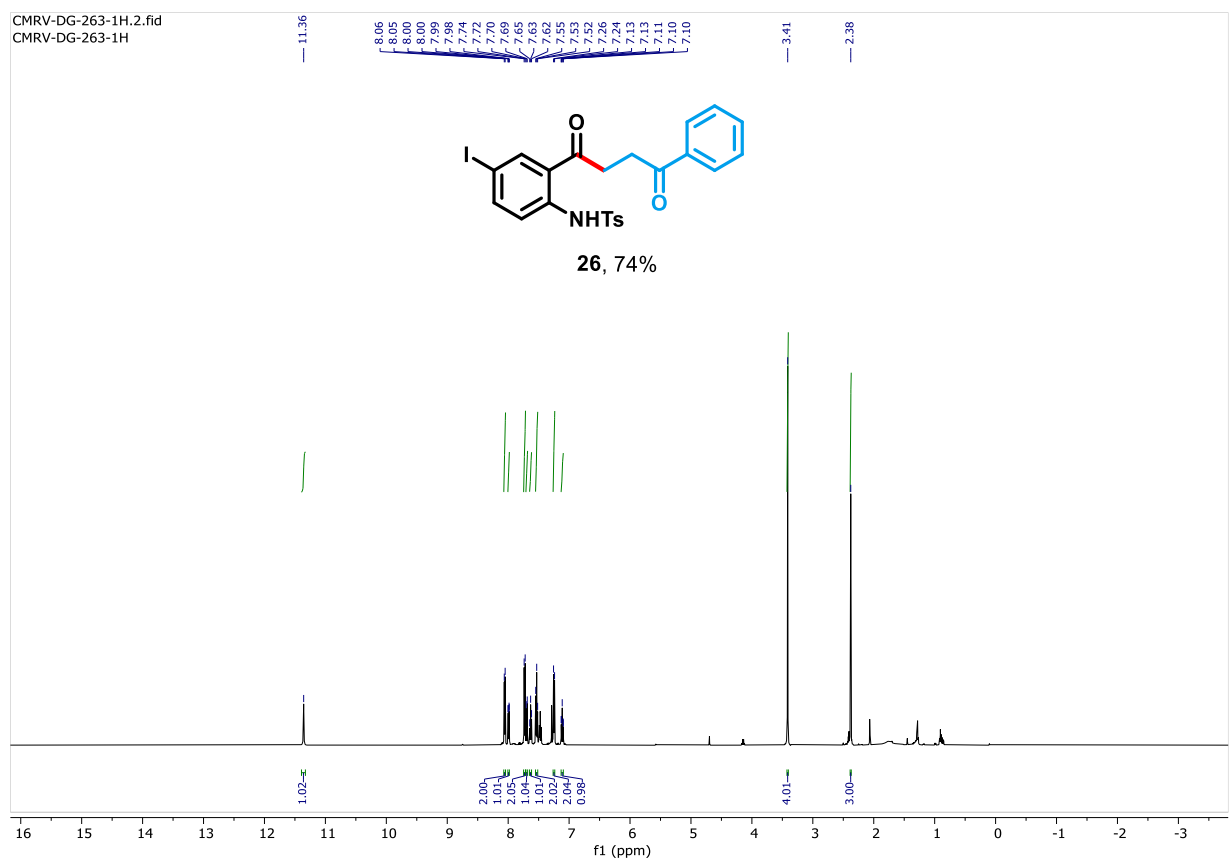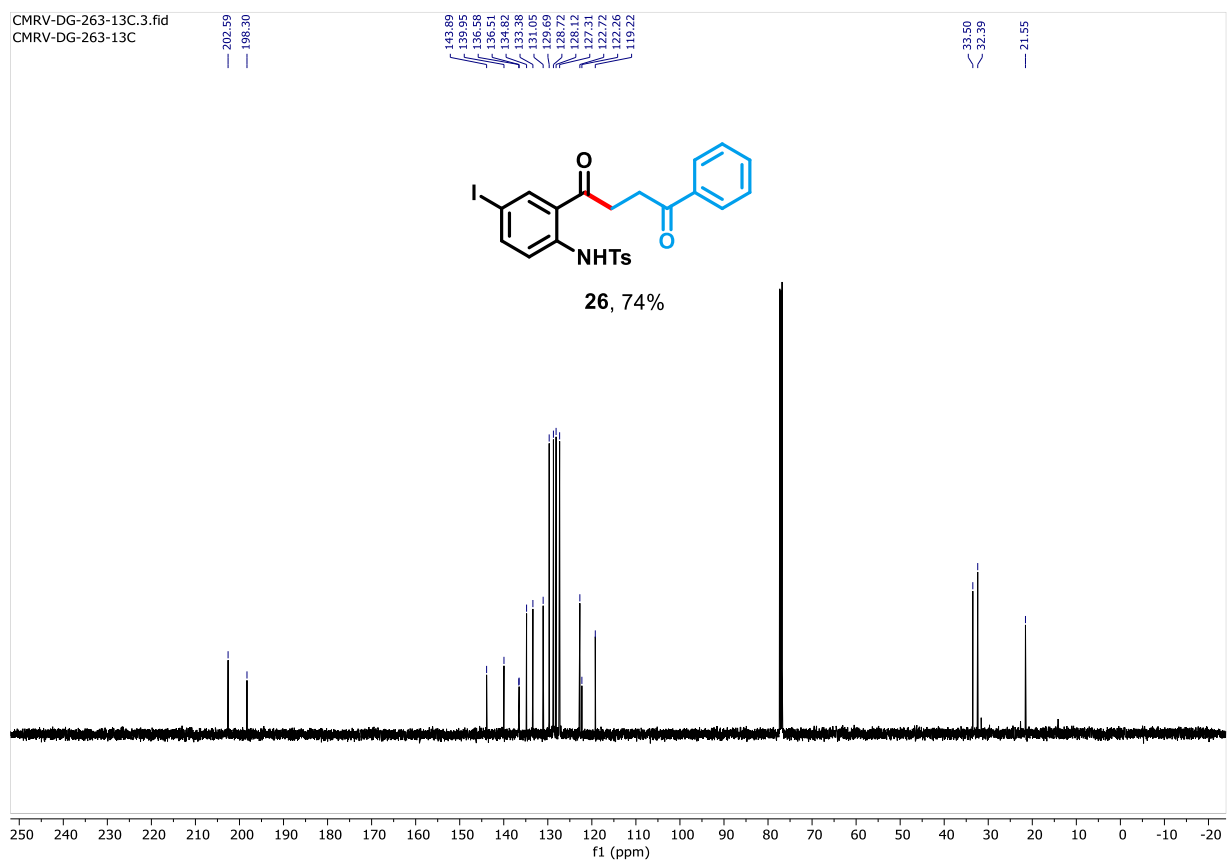

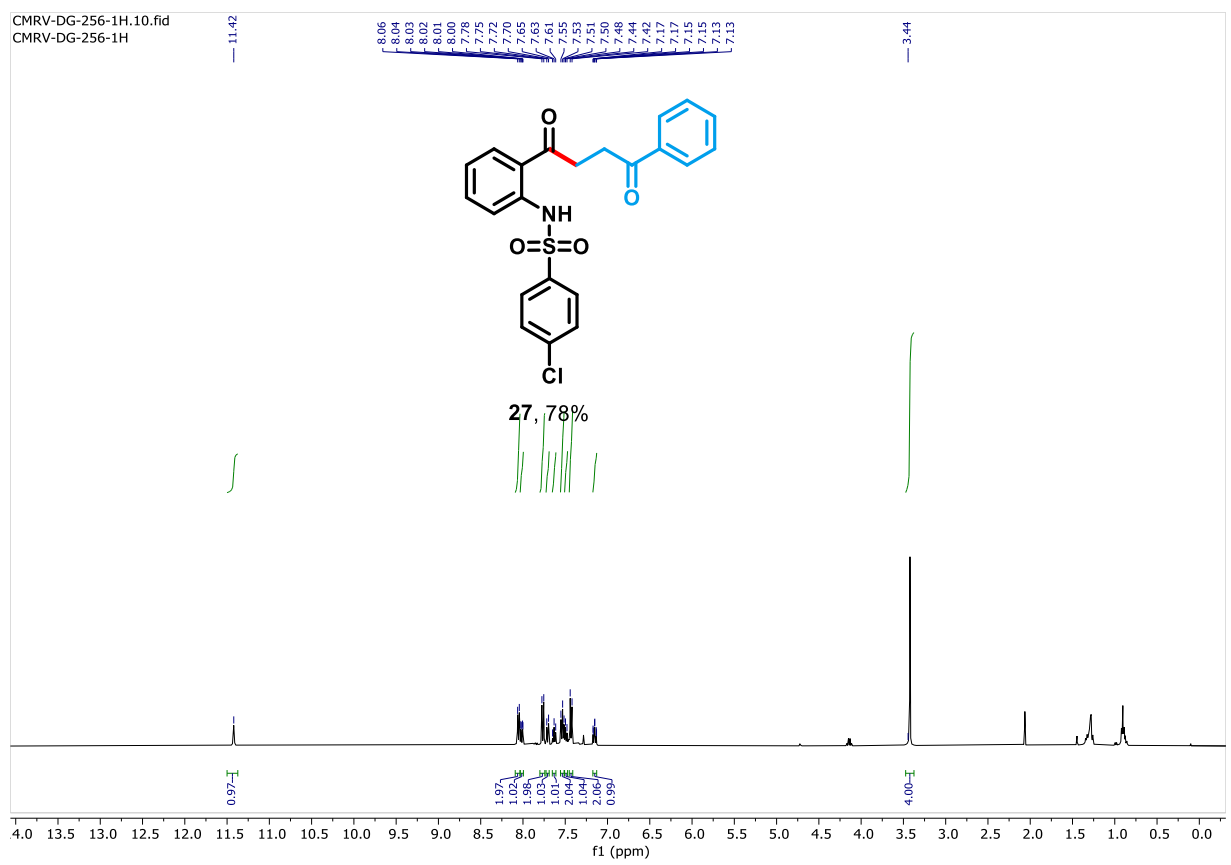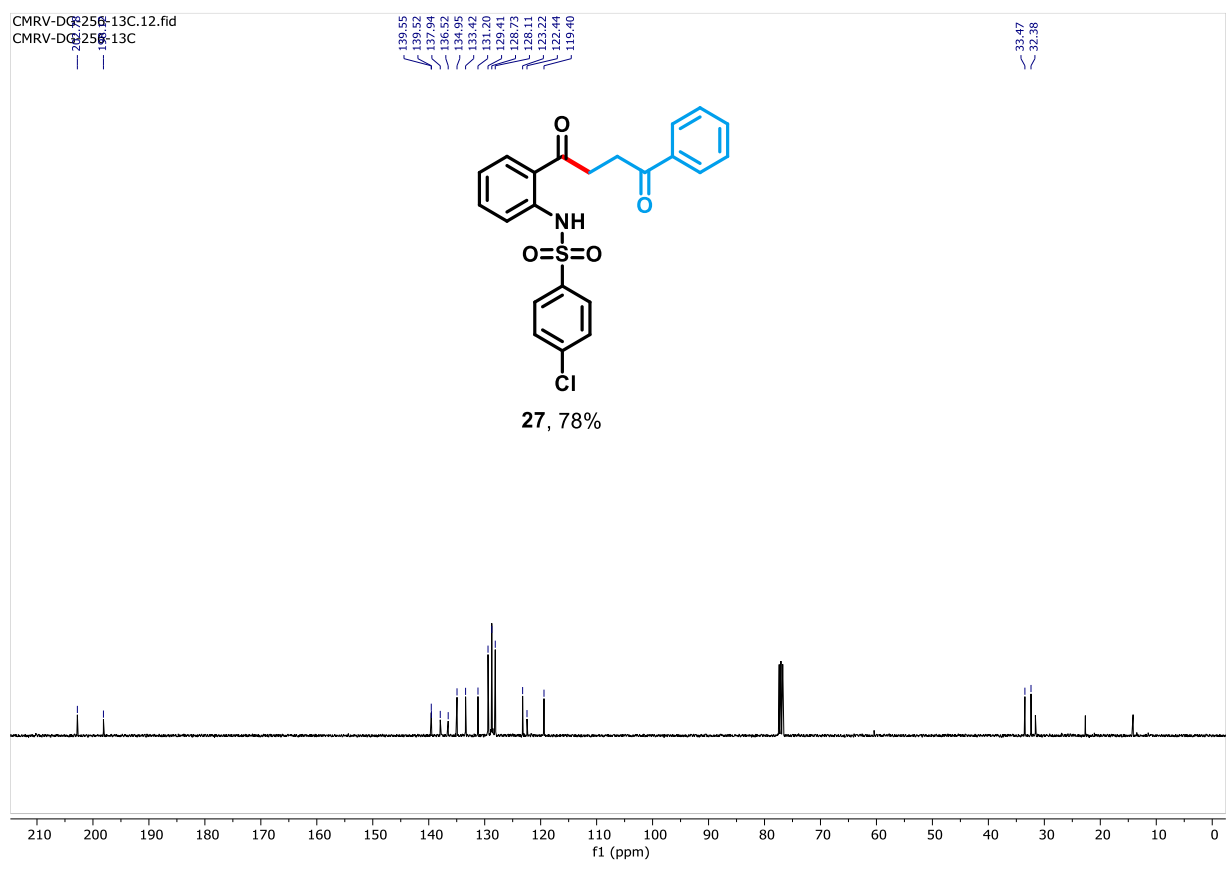

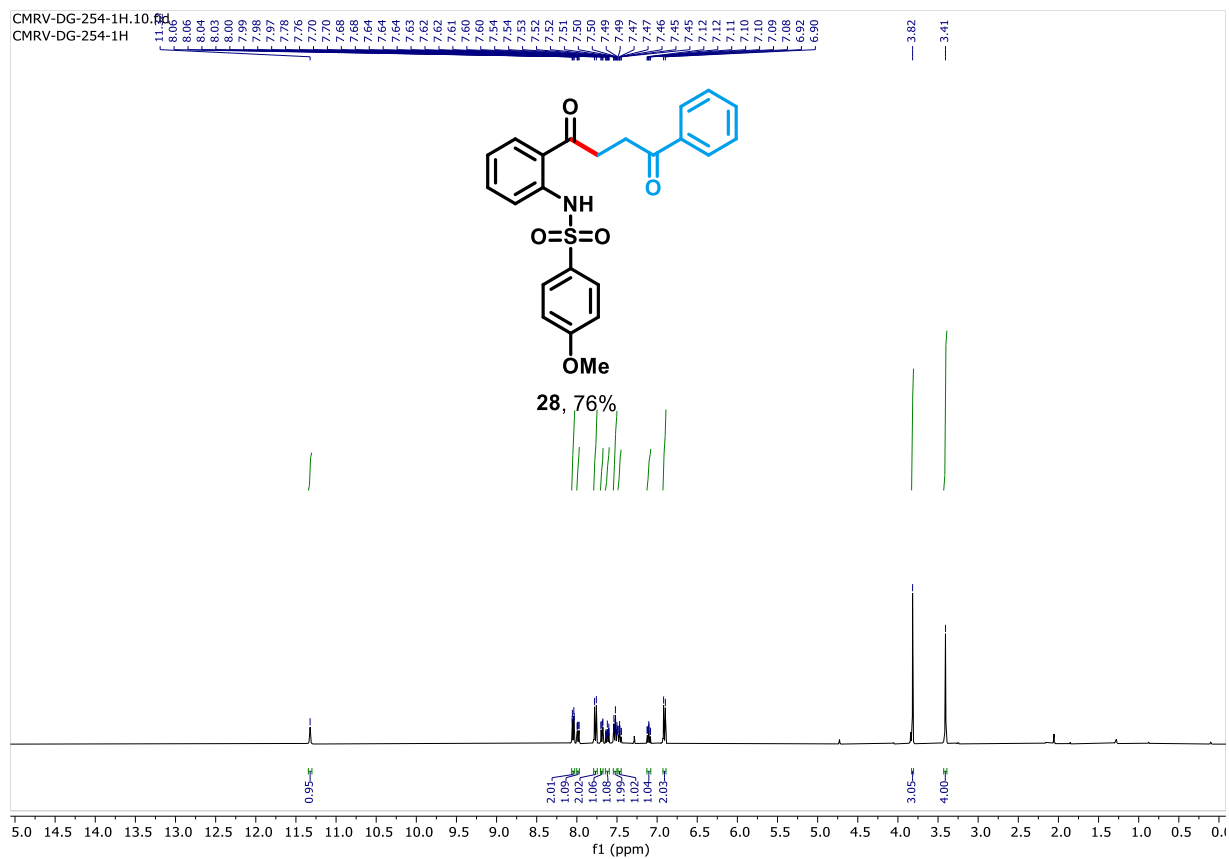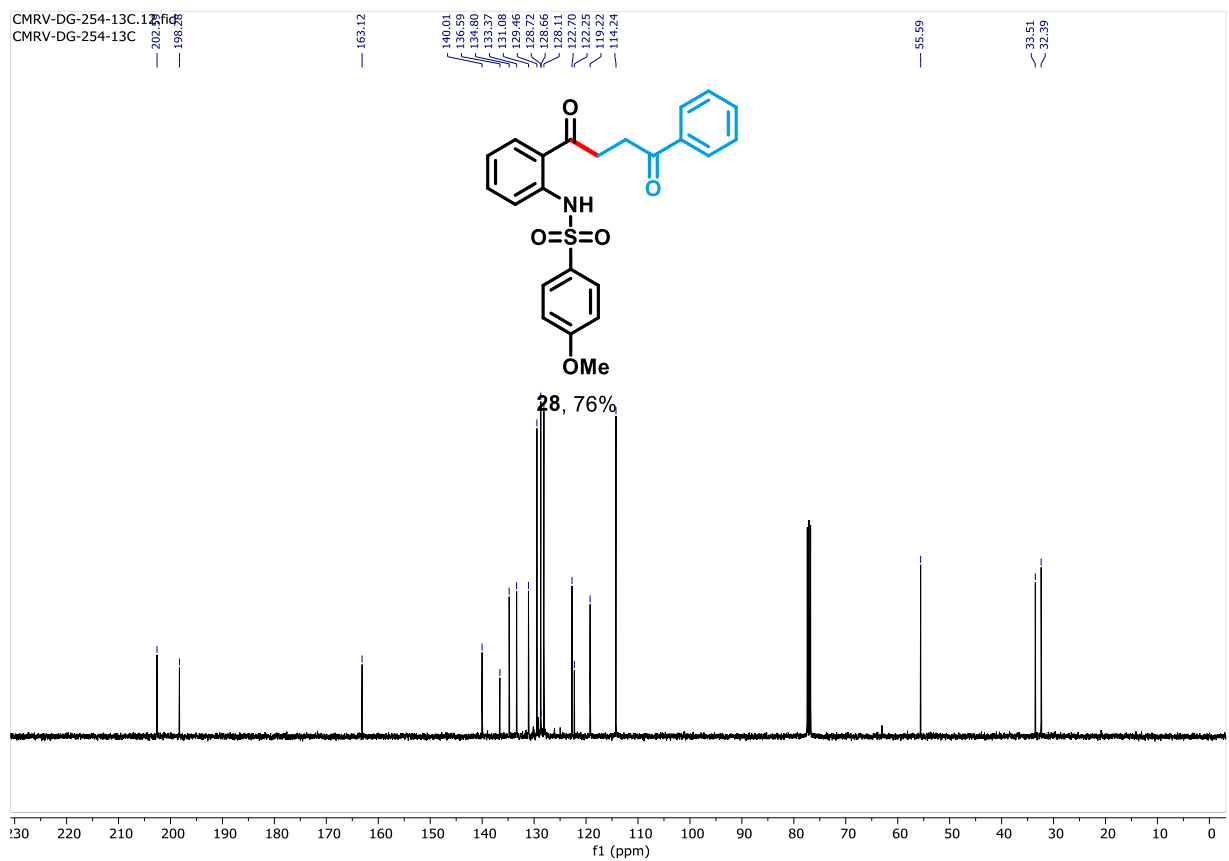

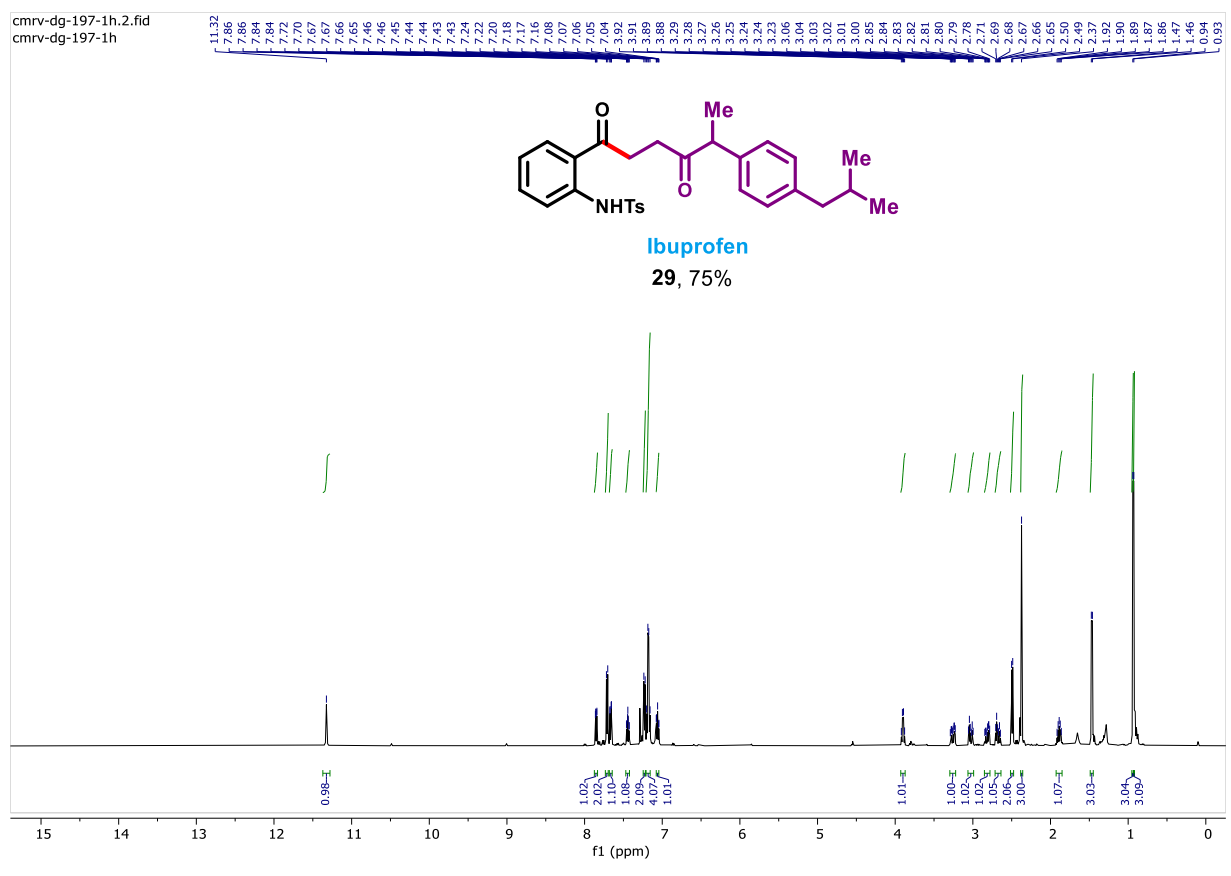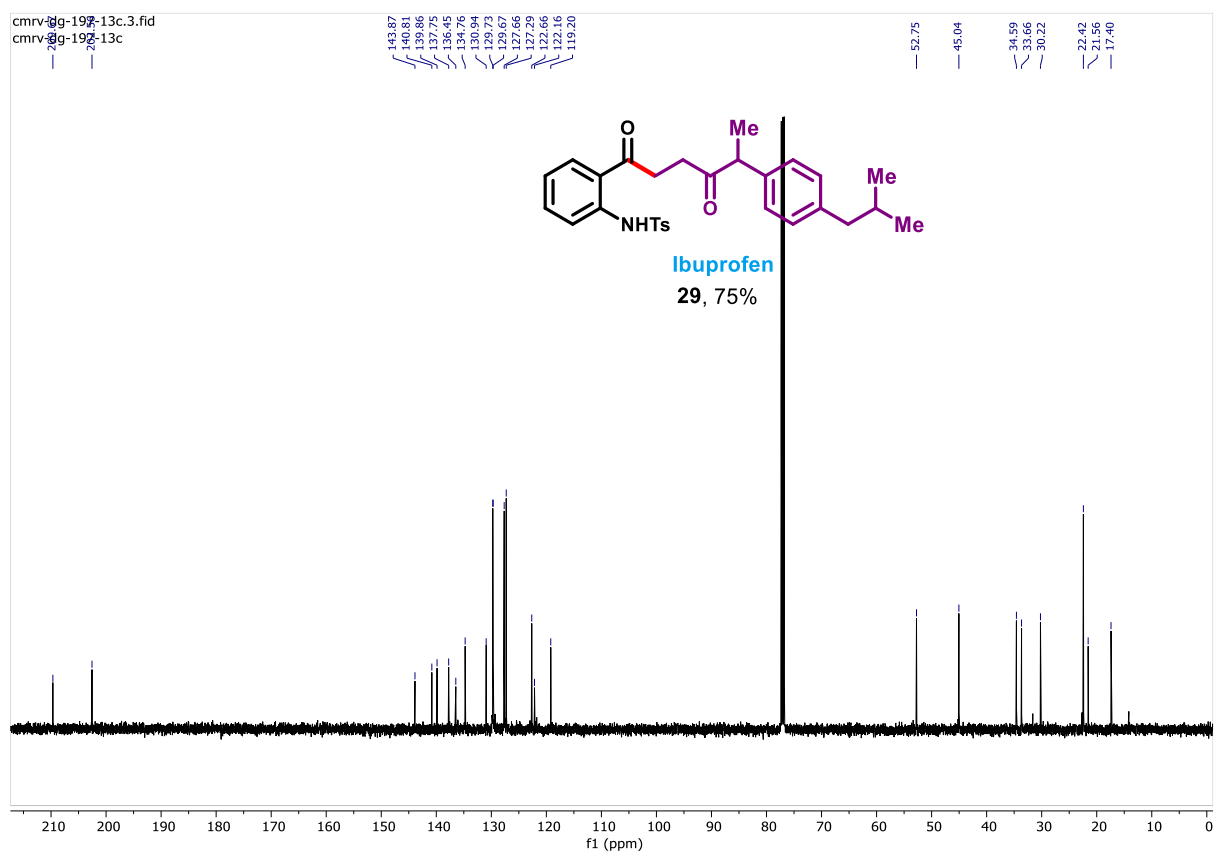

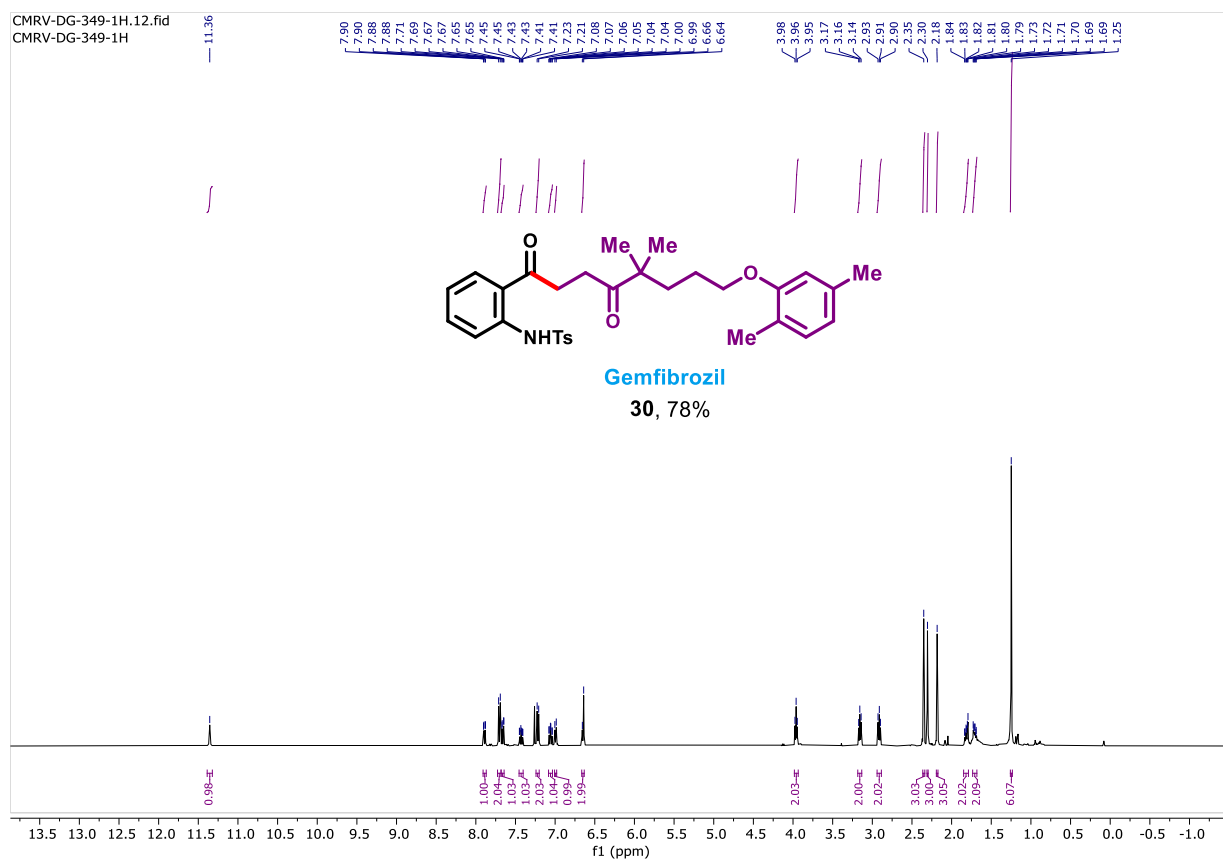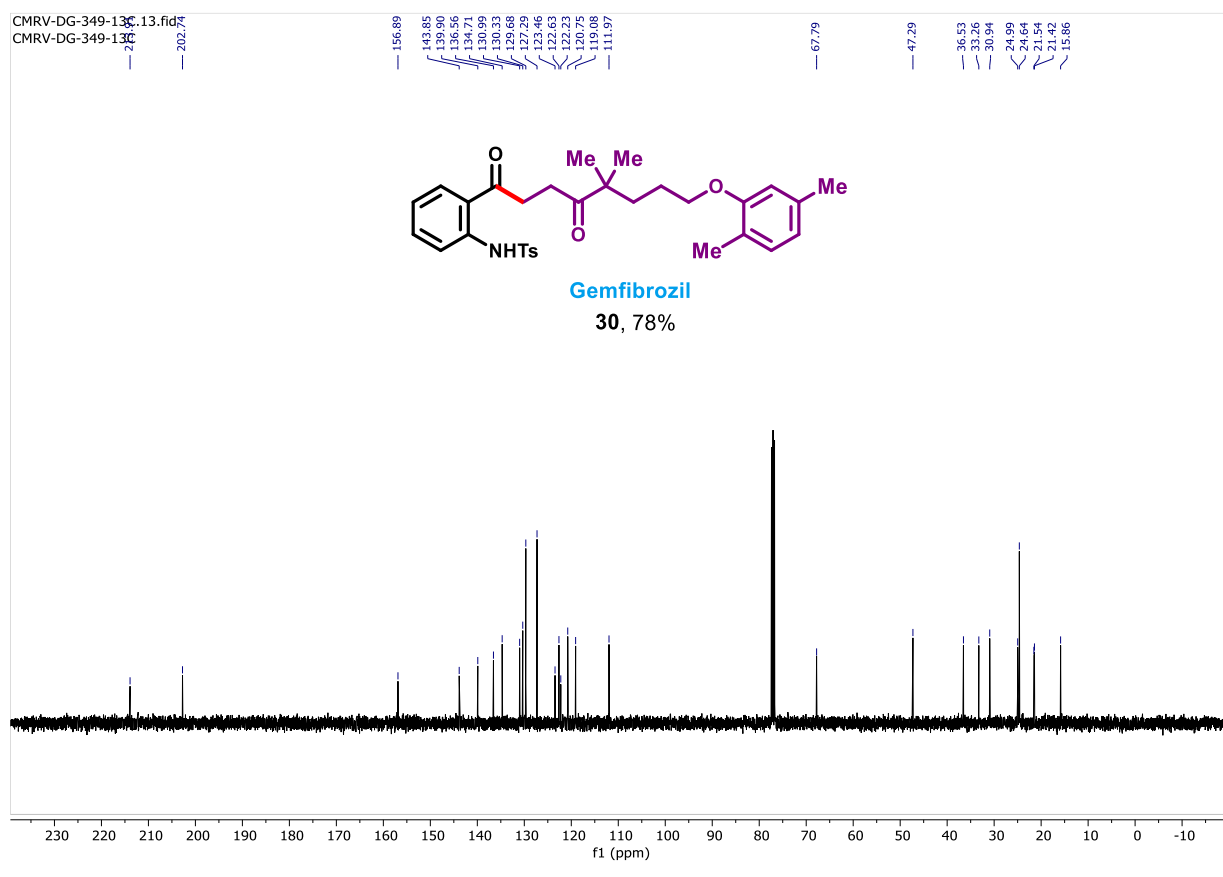





32

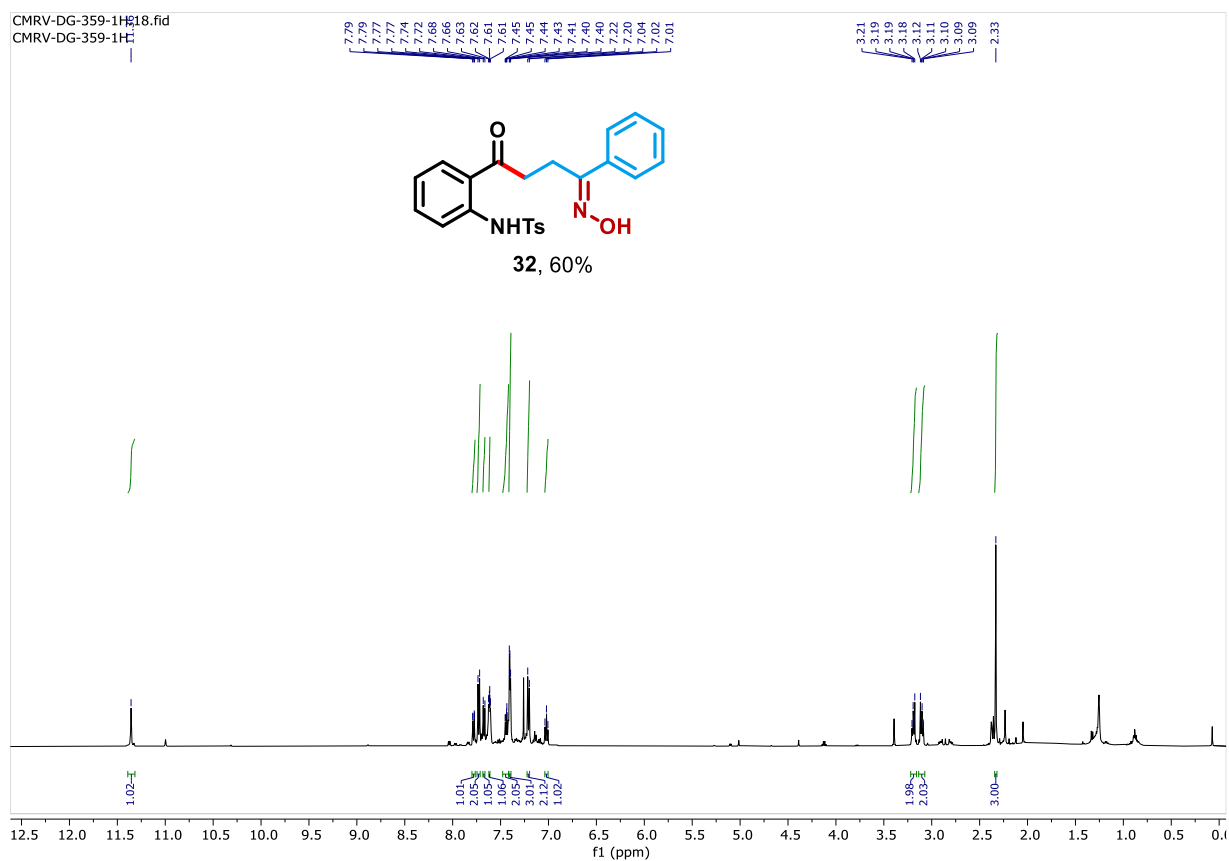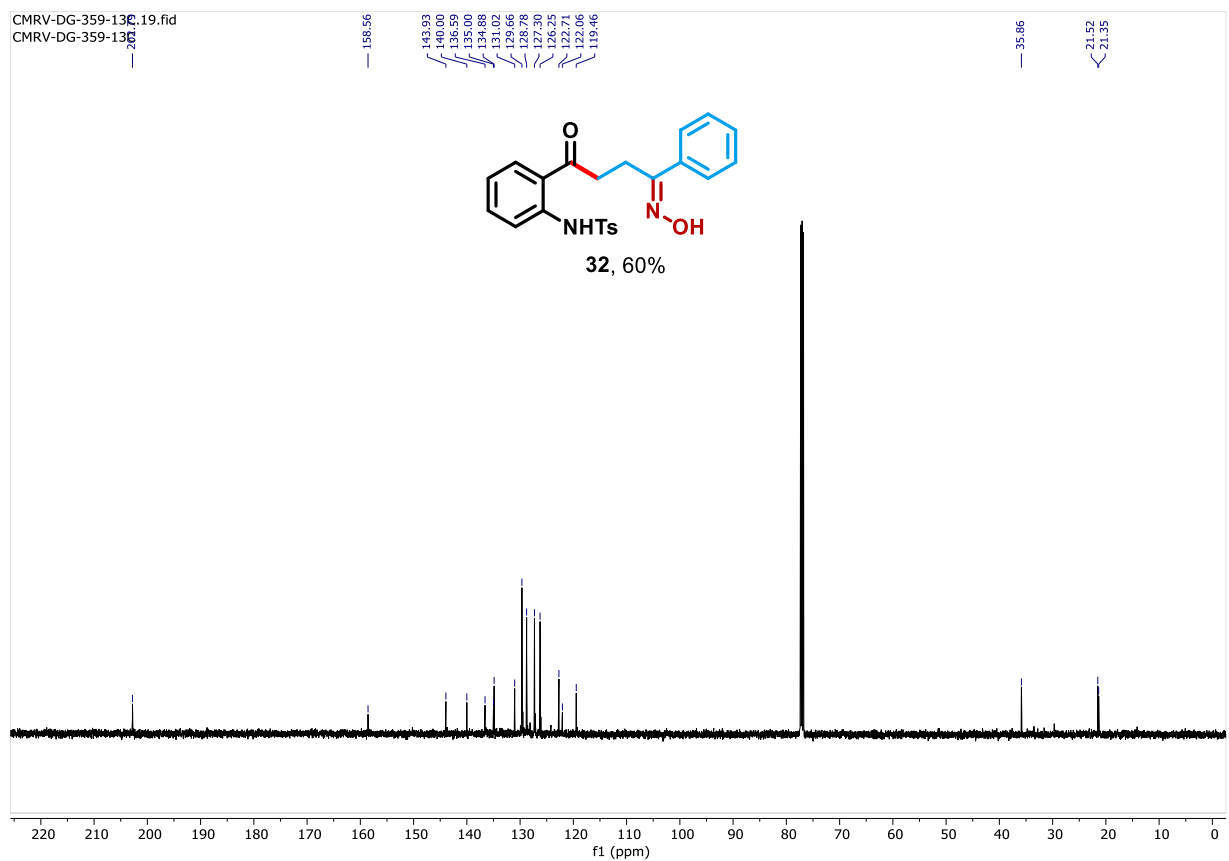

81

33

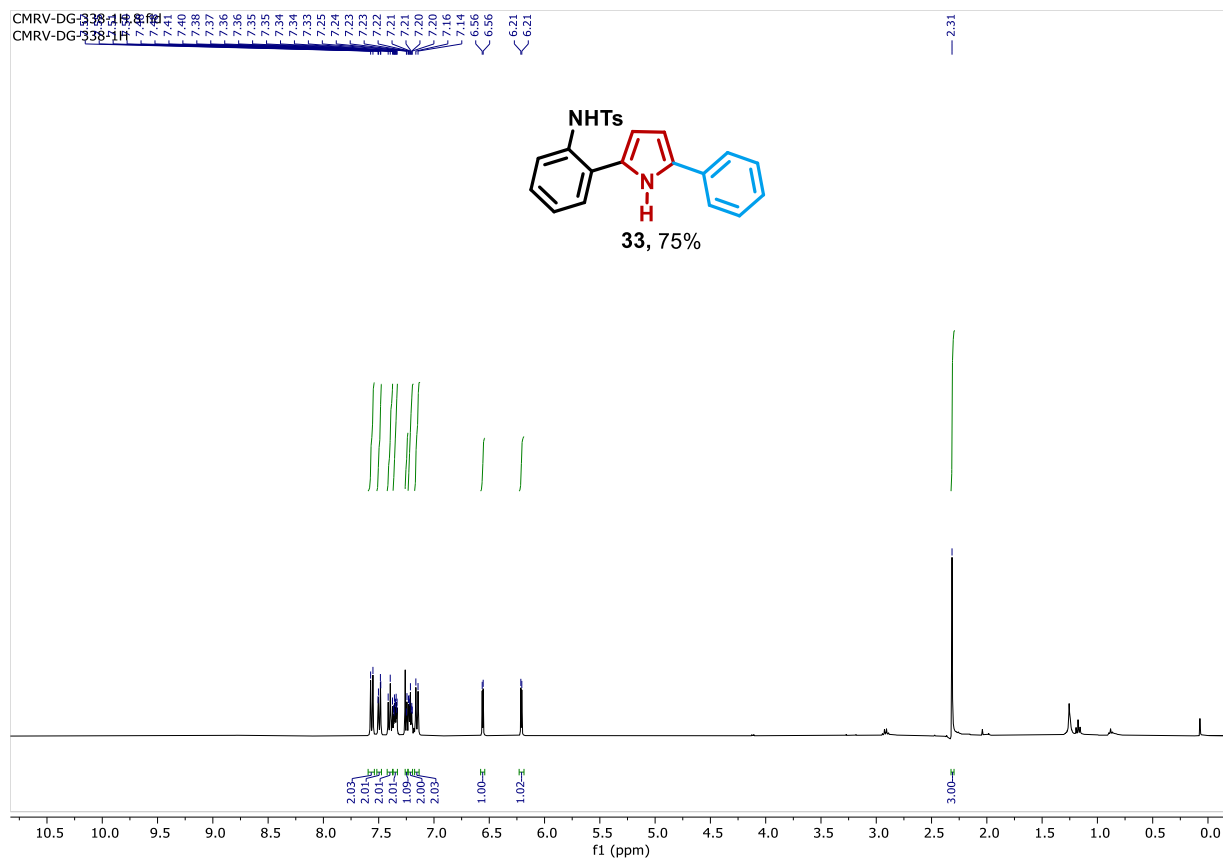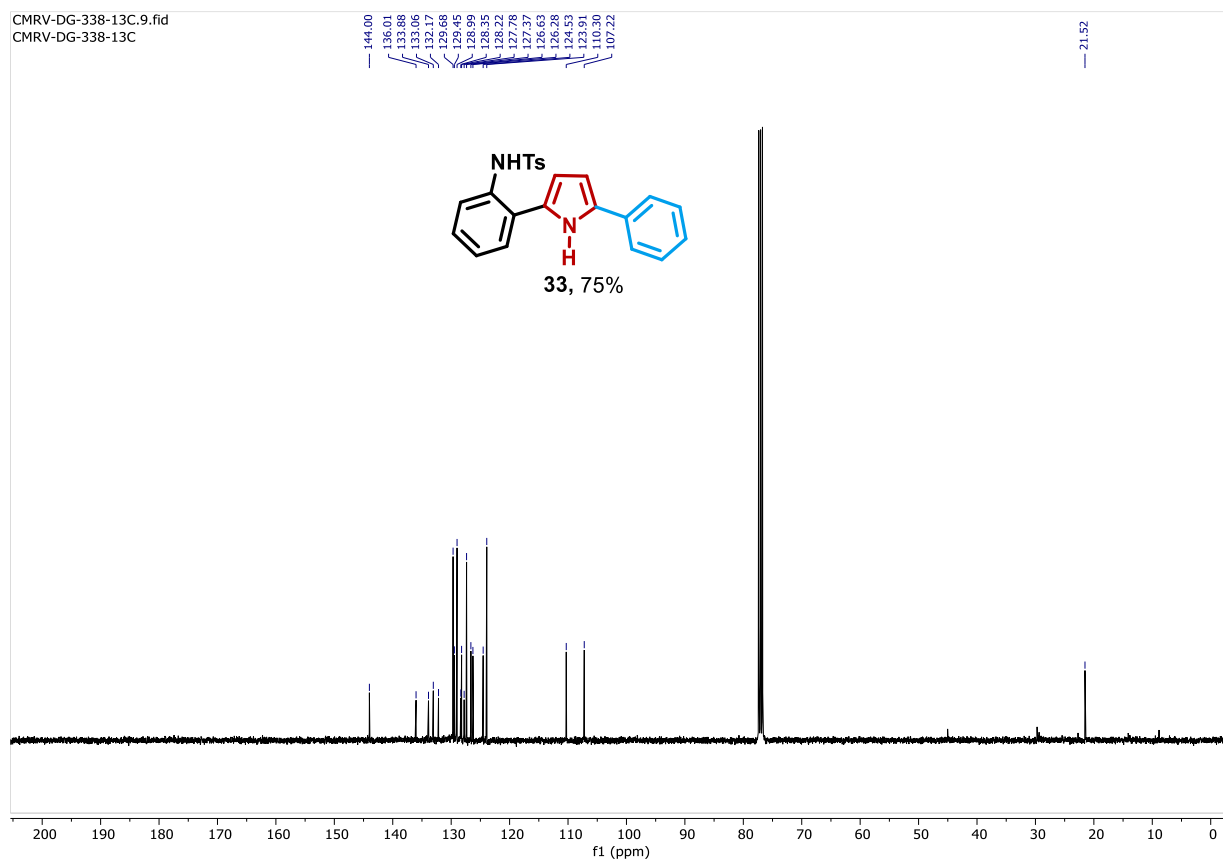

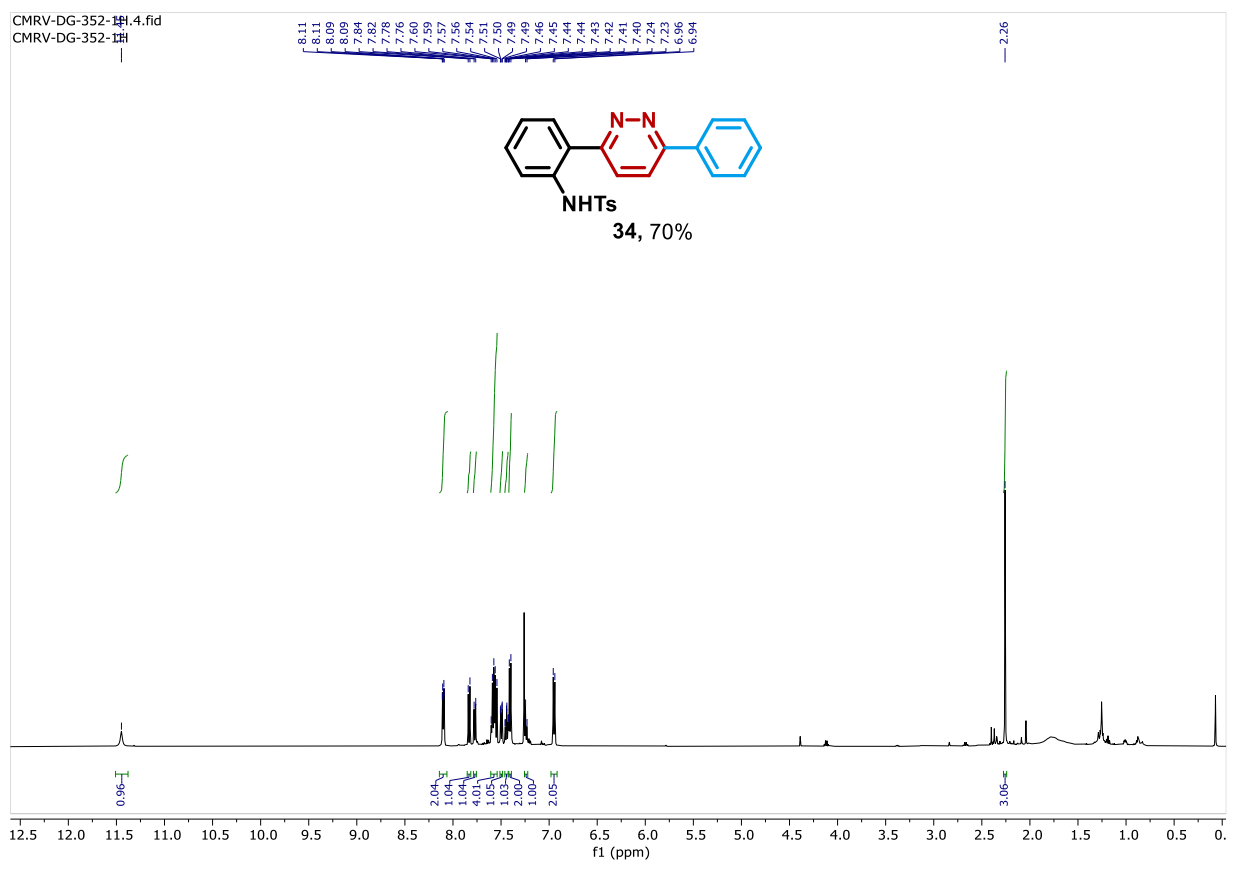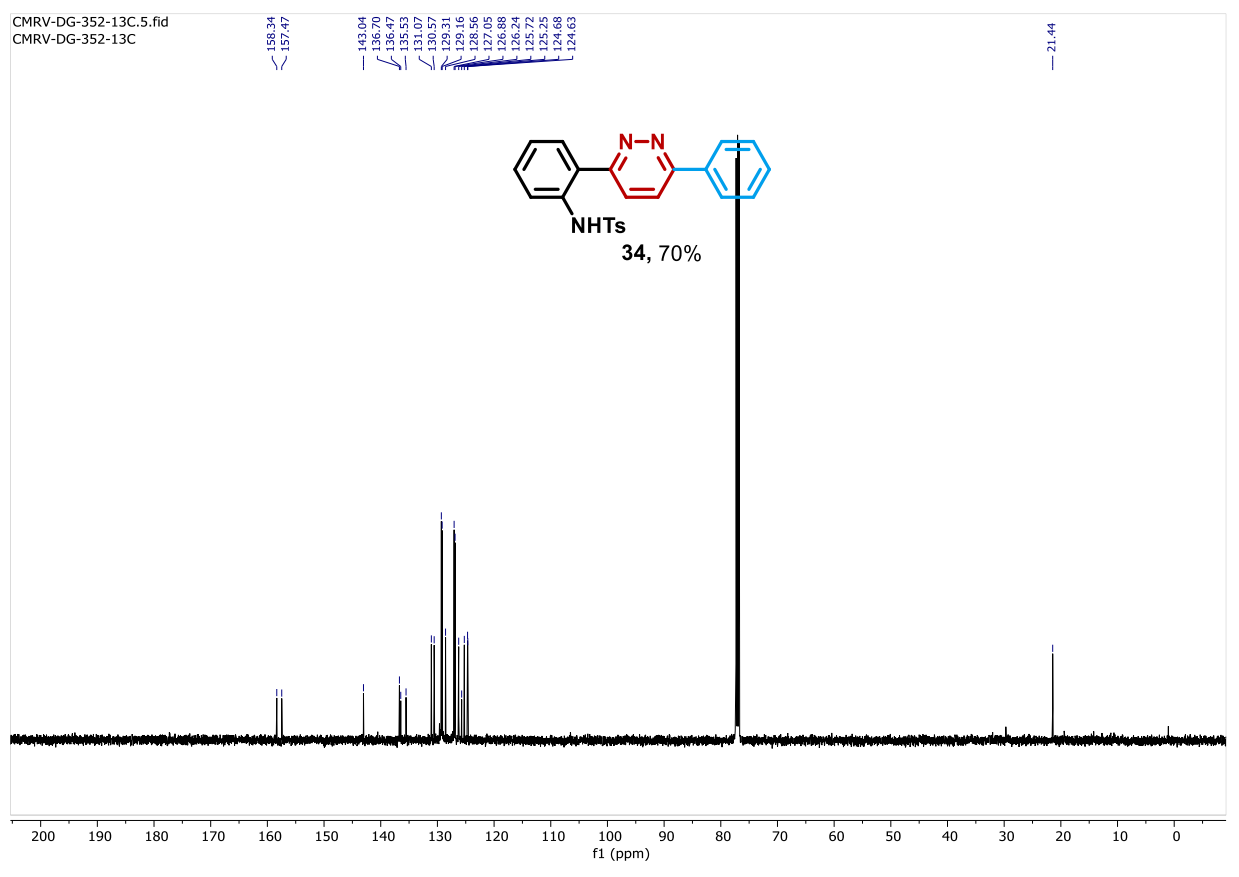

35

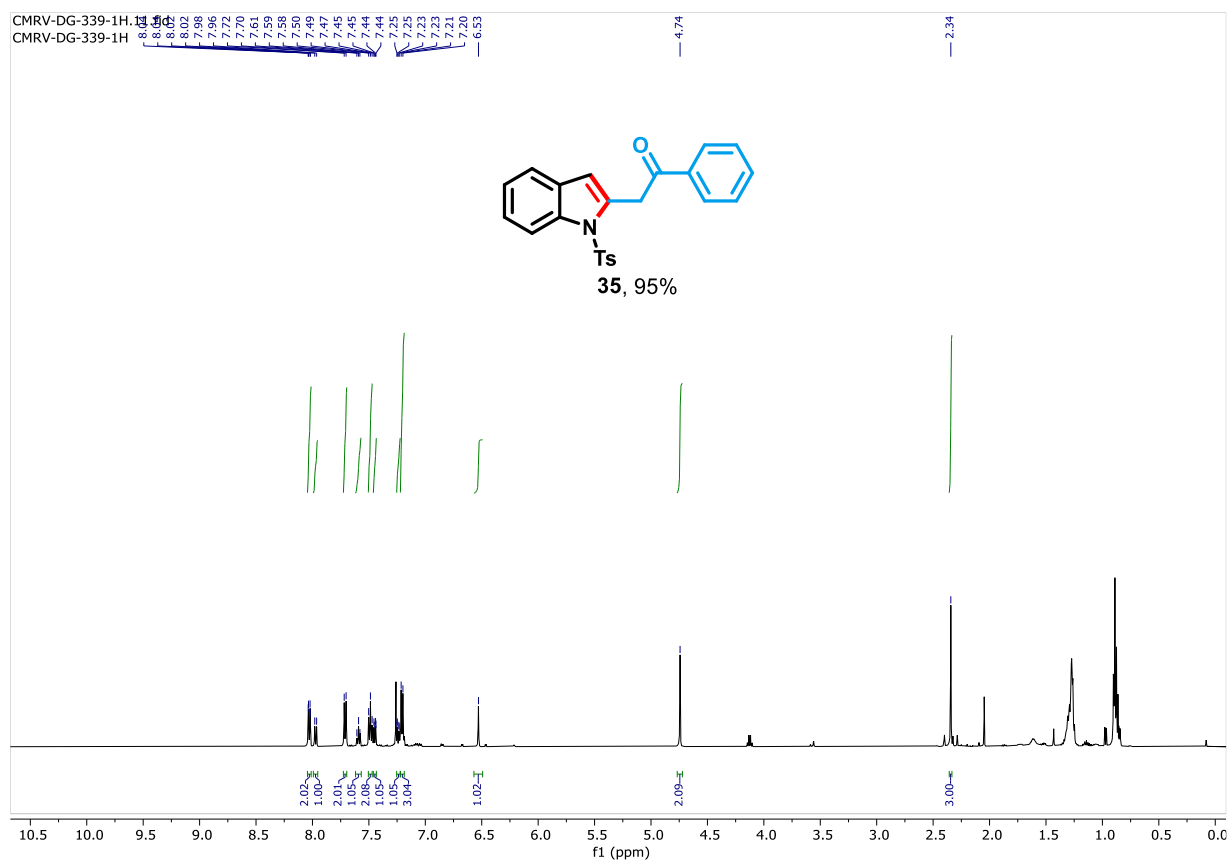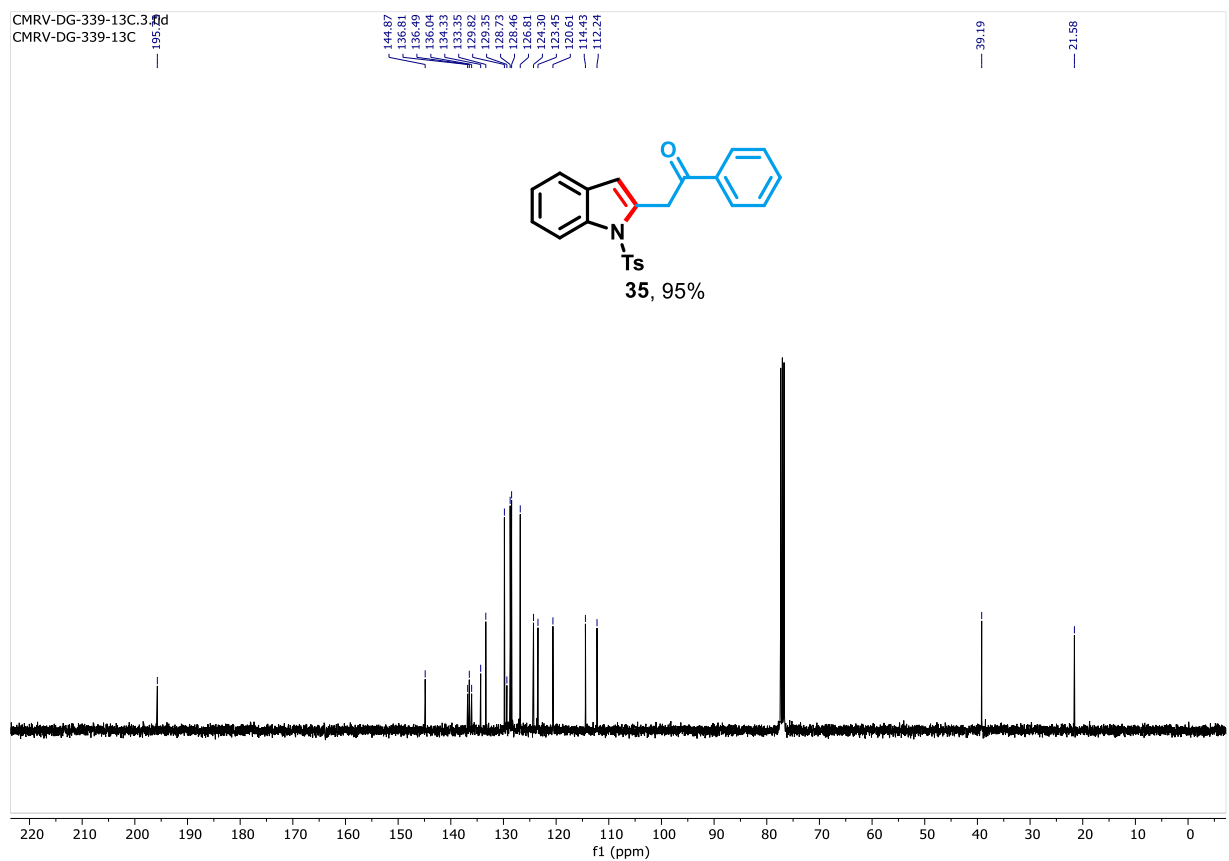

36

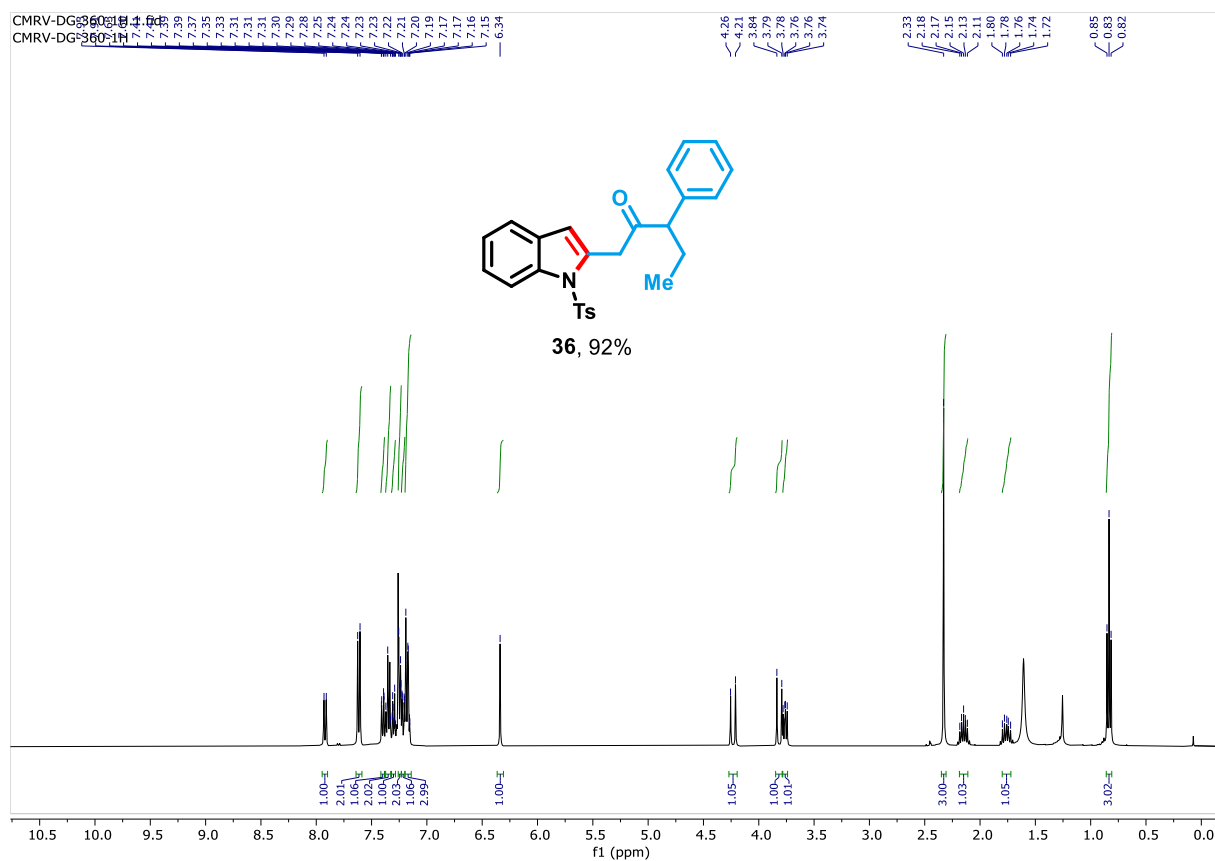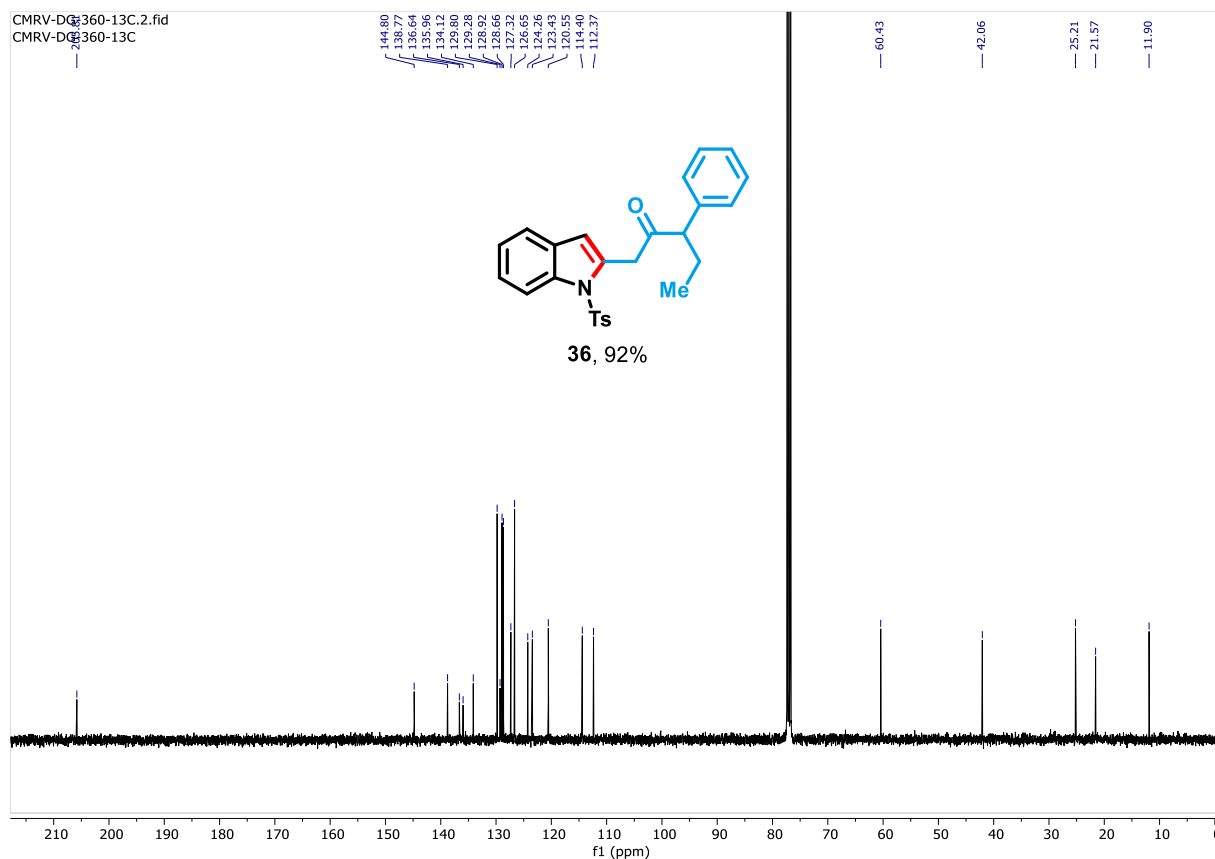

37

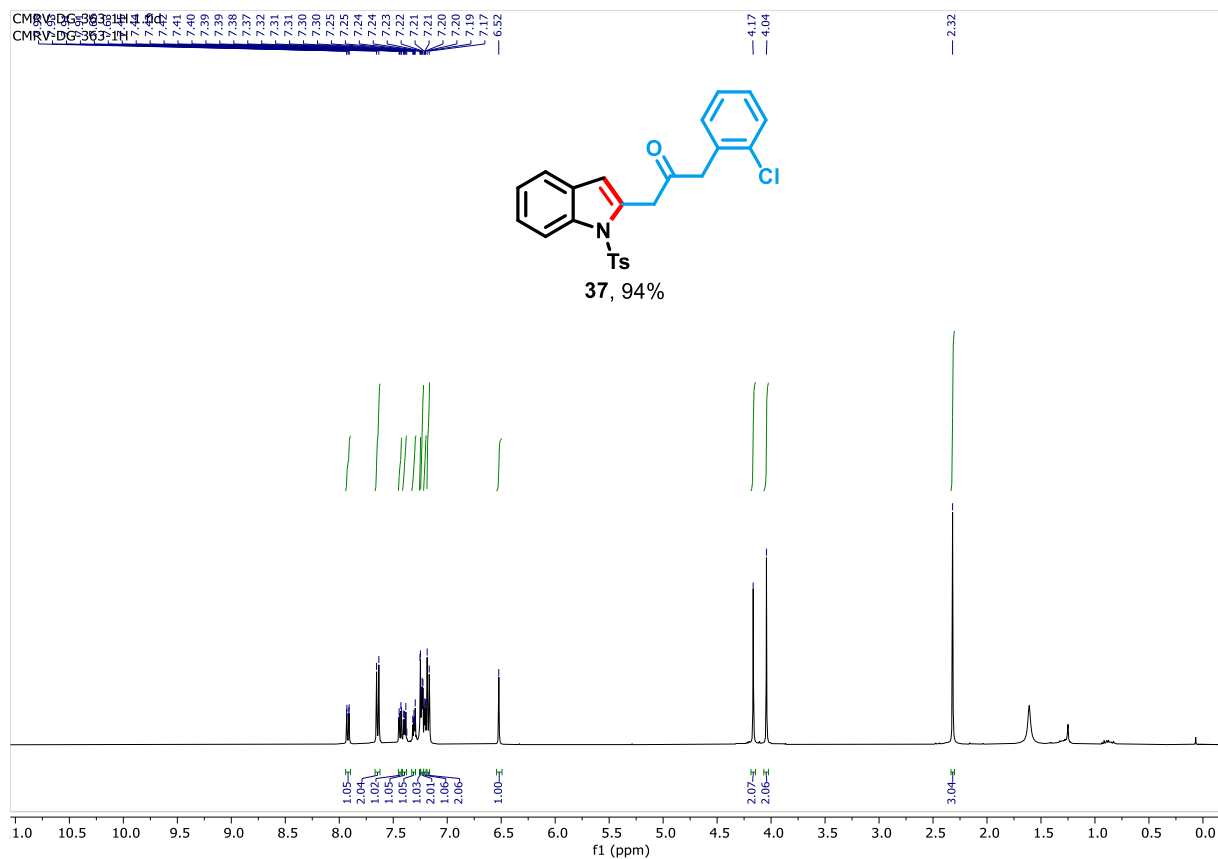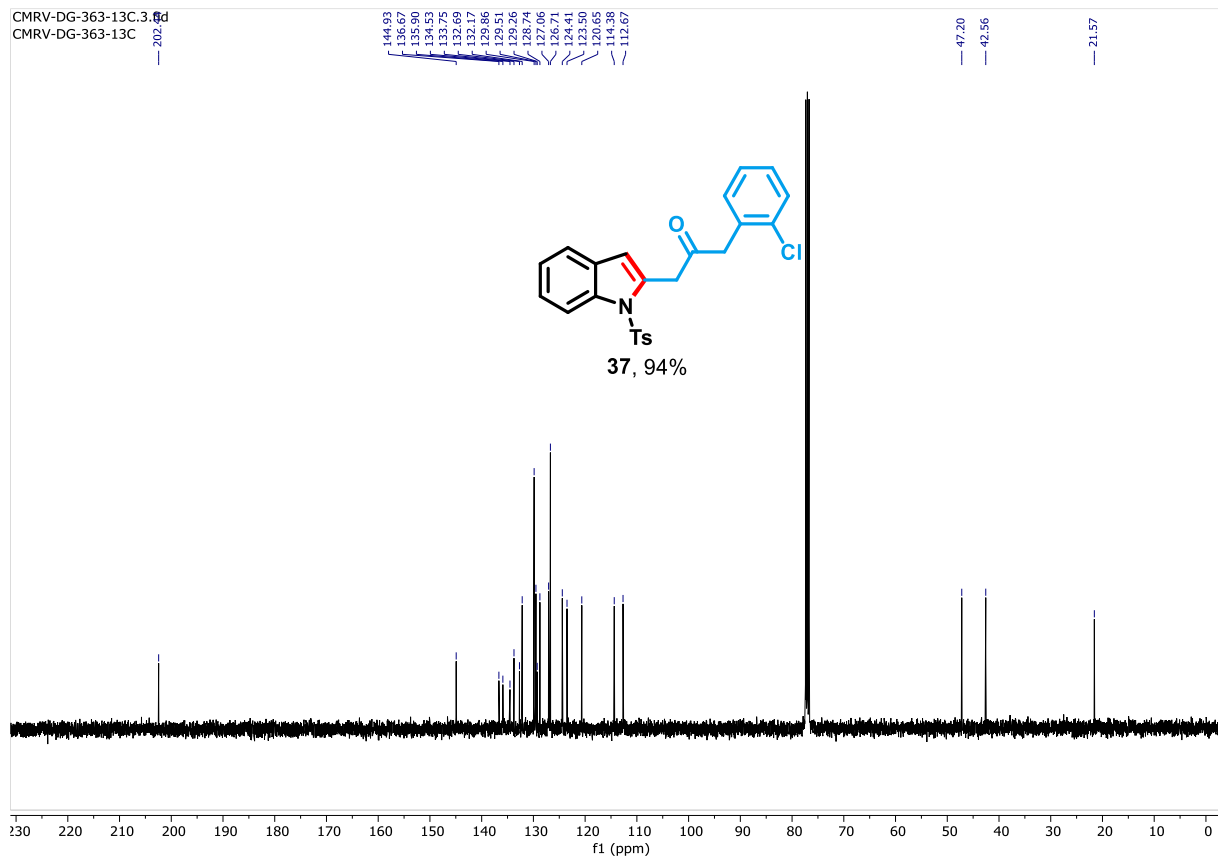

38

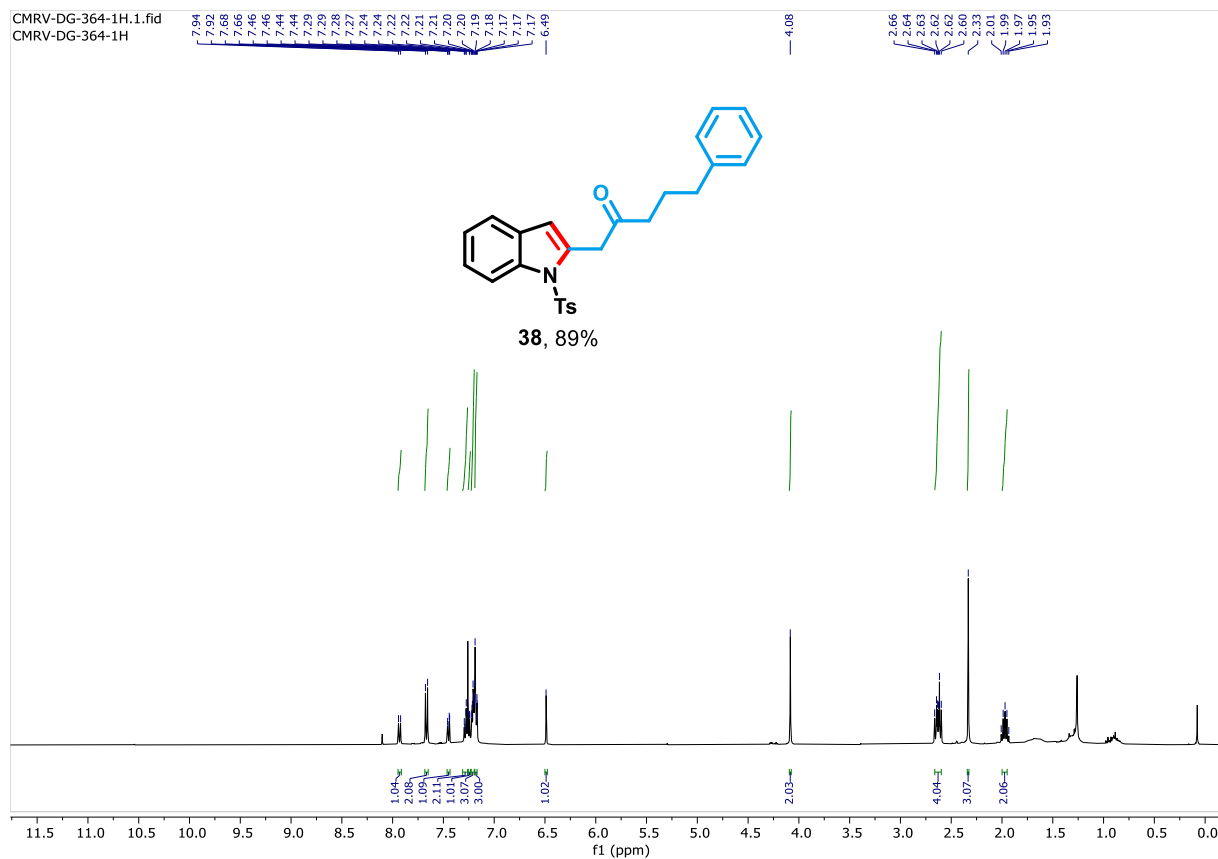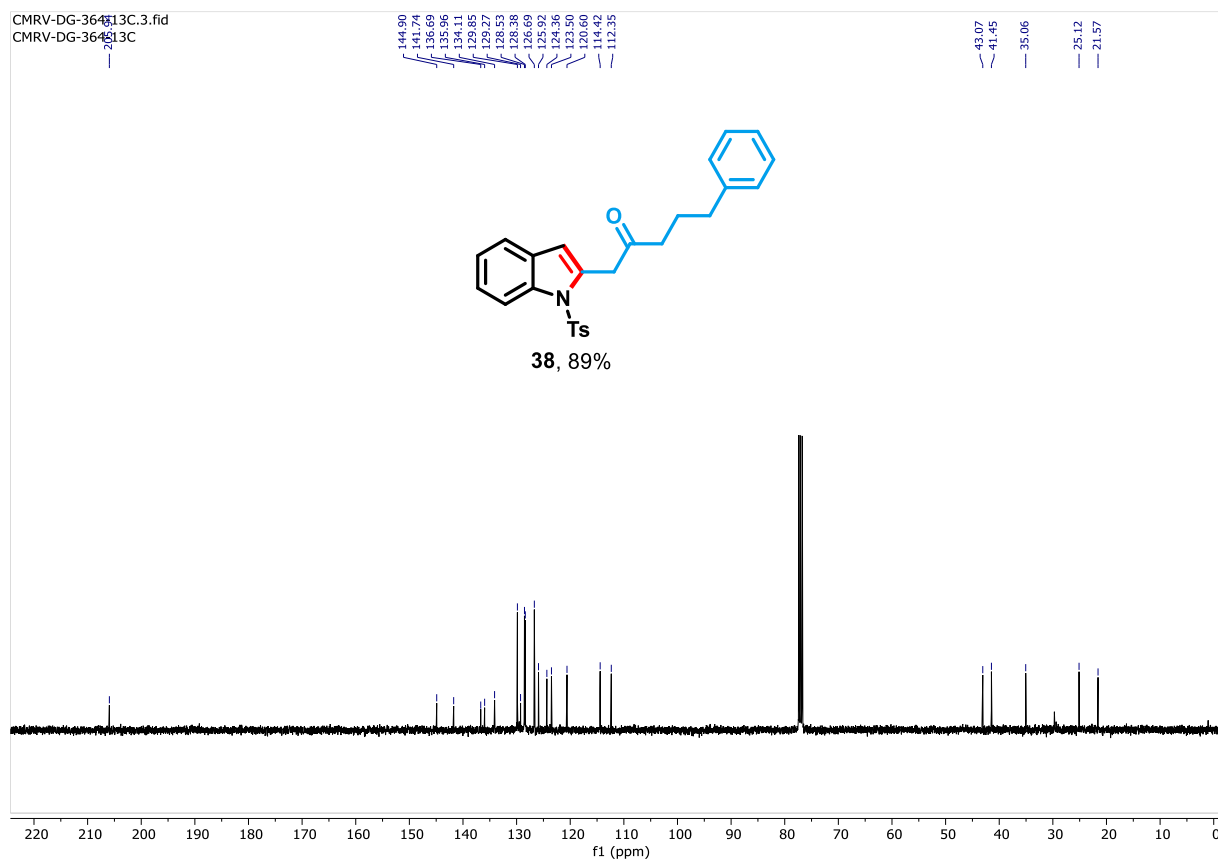

39

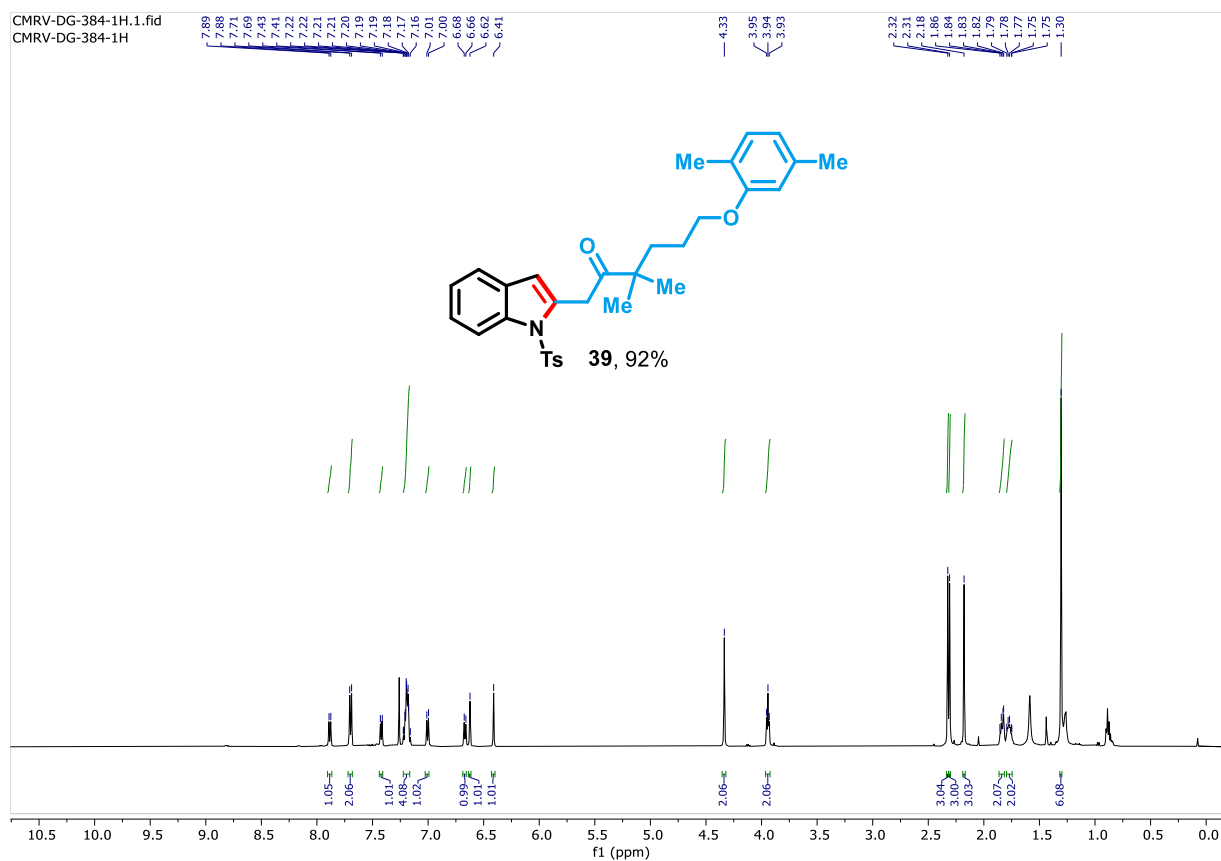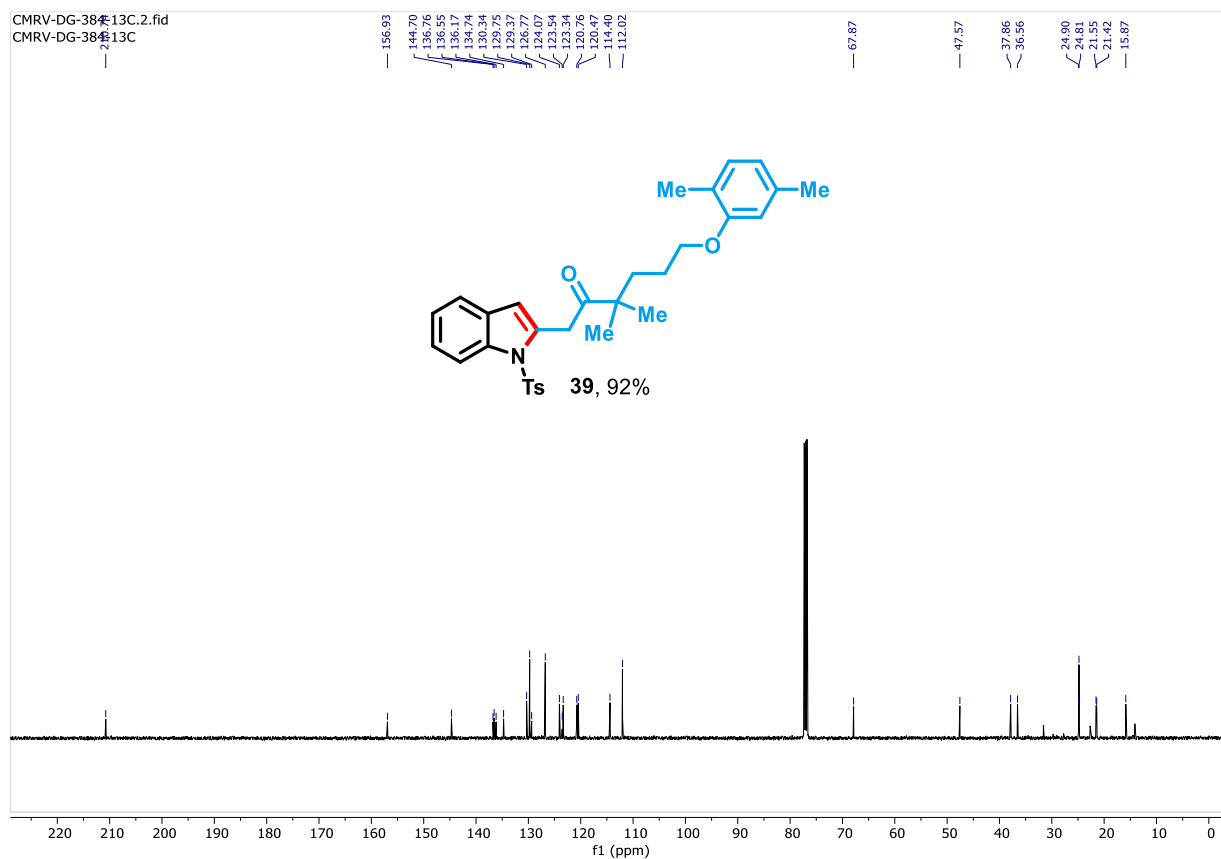



40

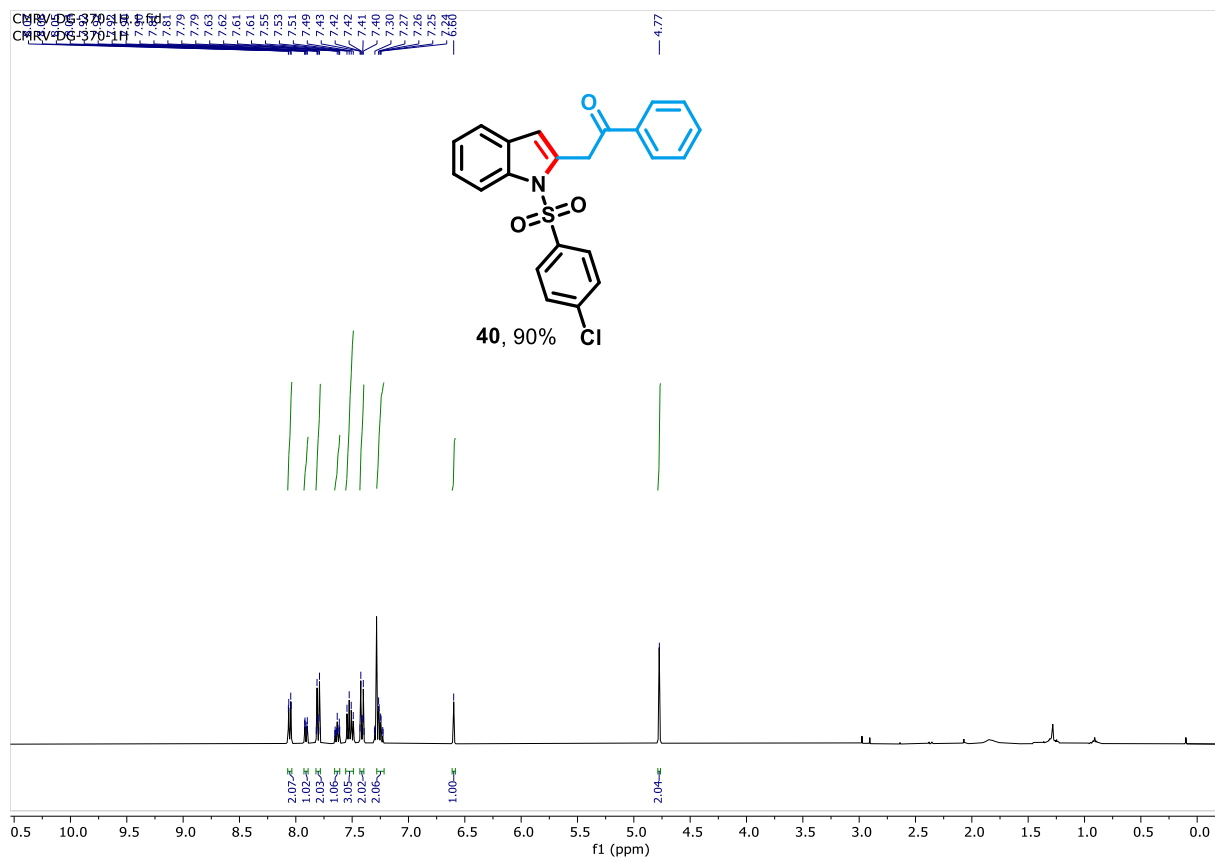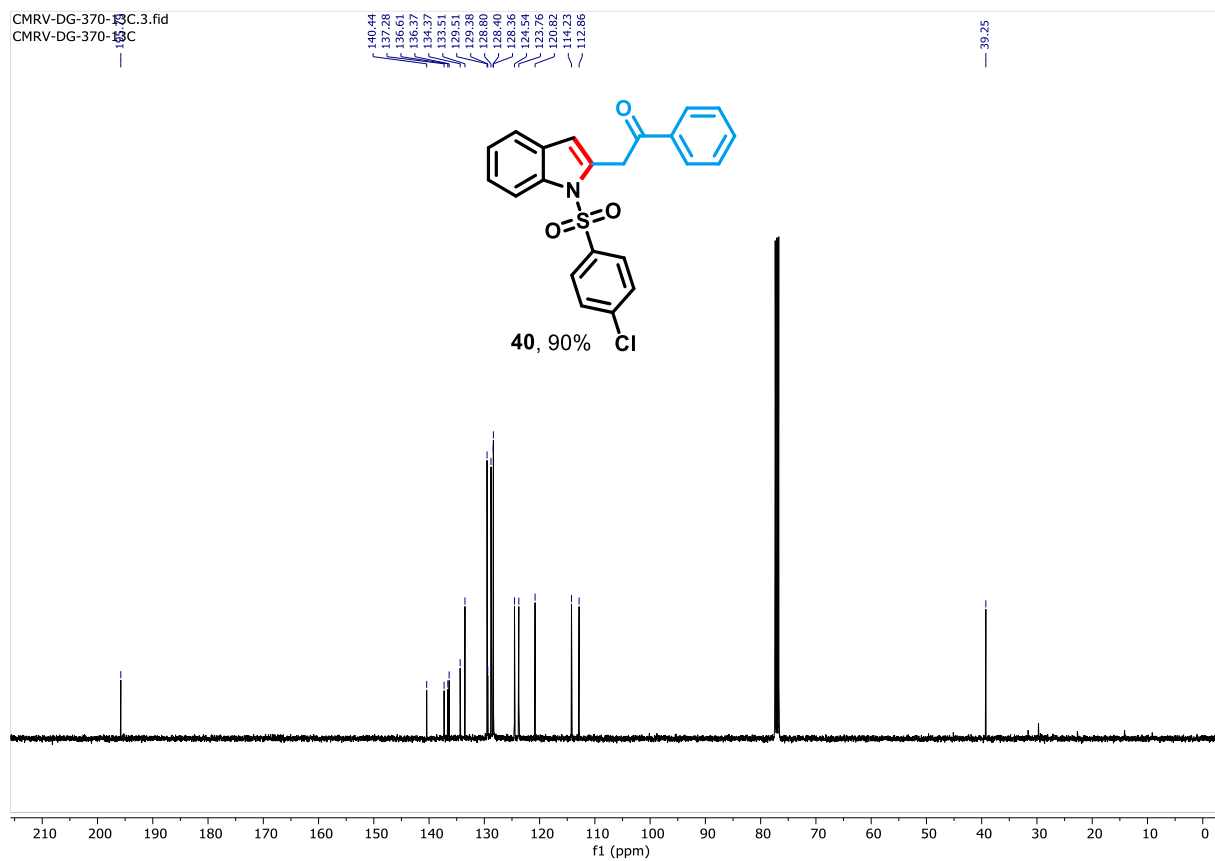

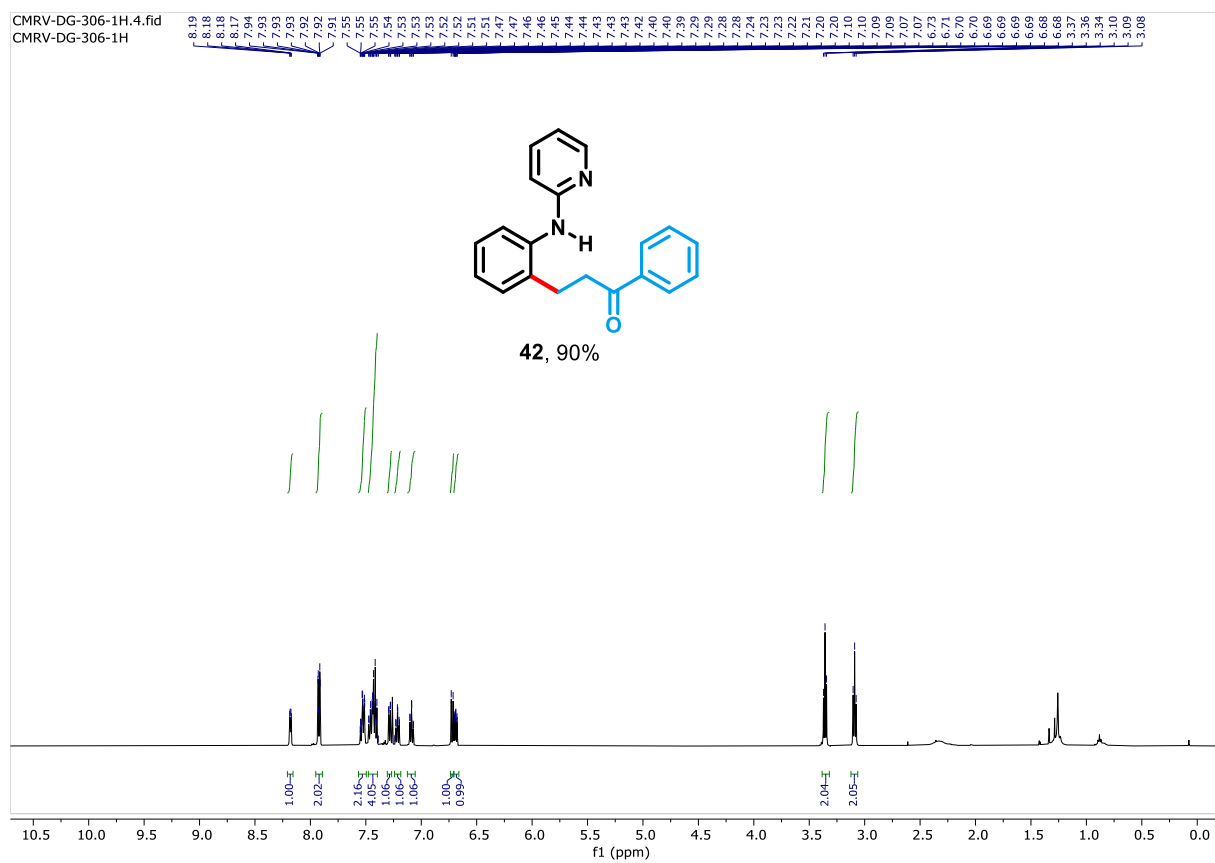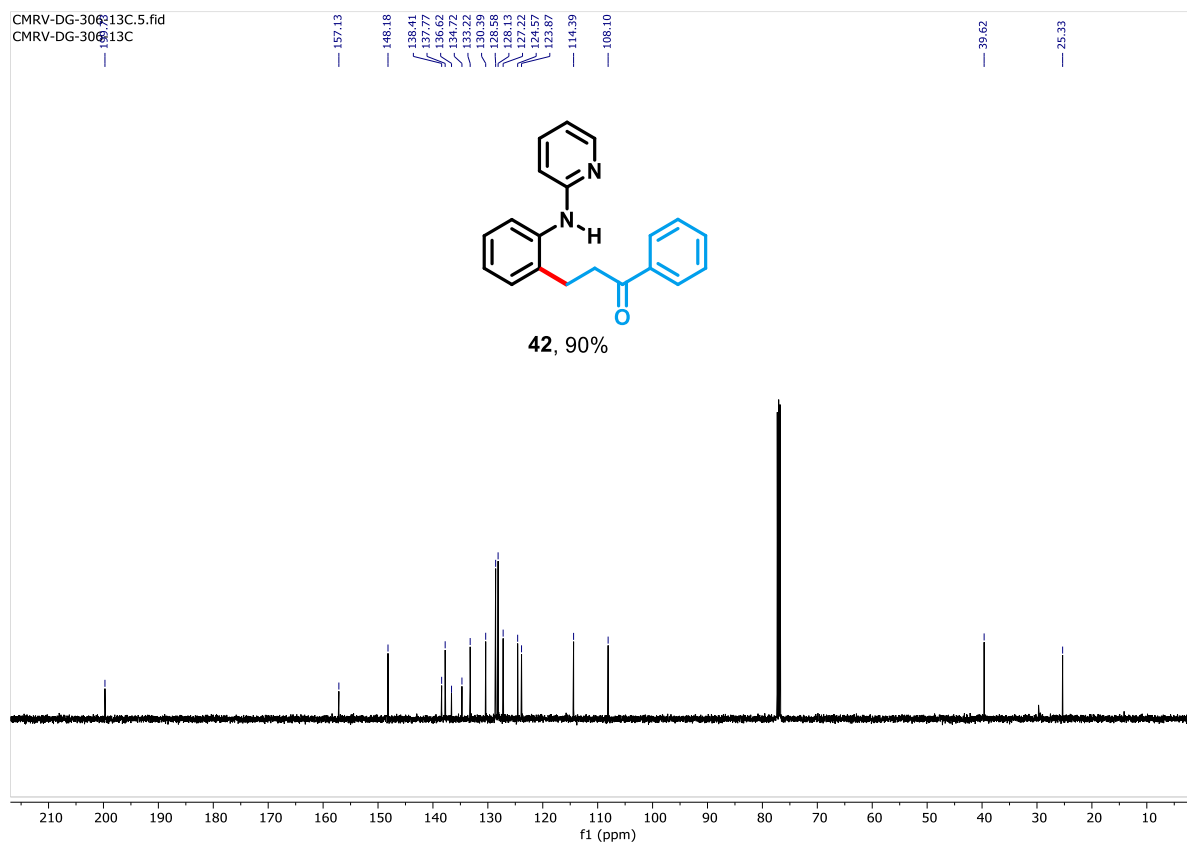

43

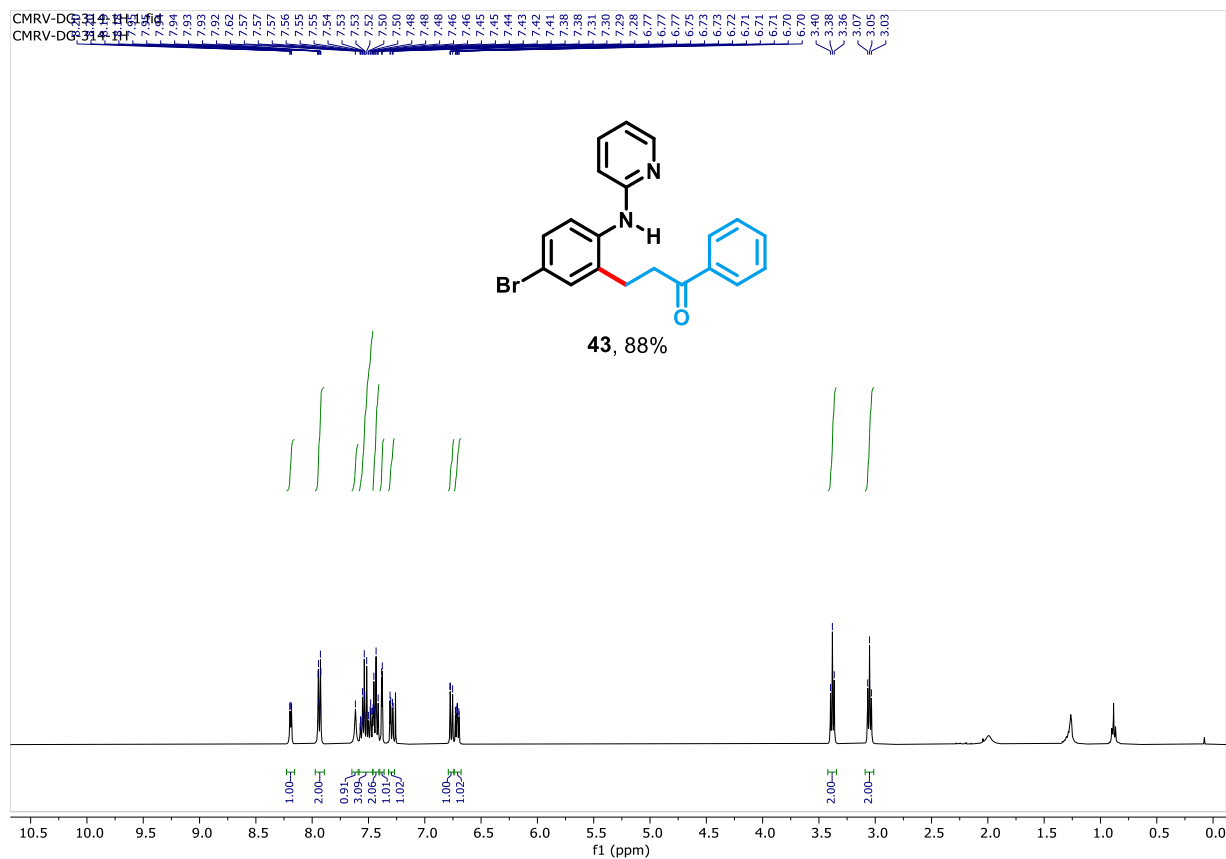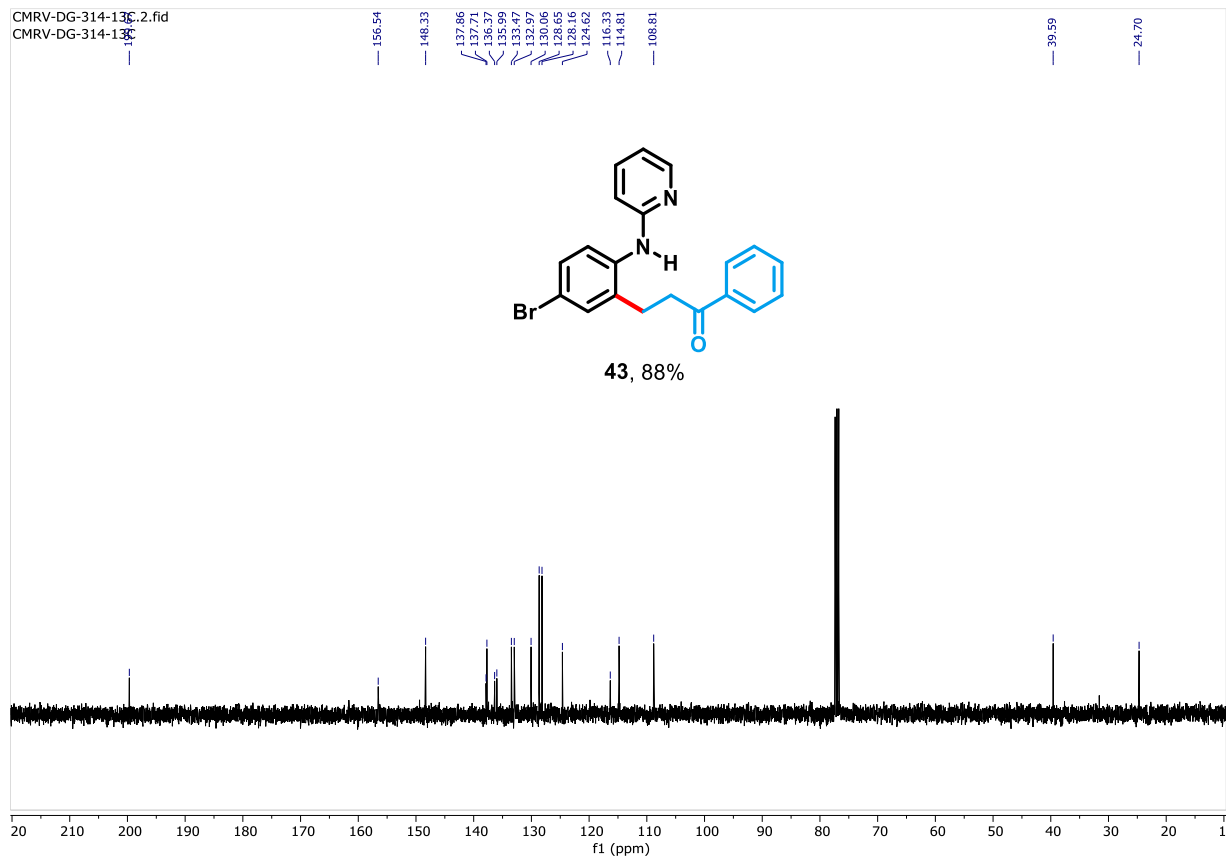

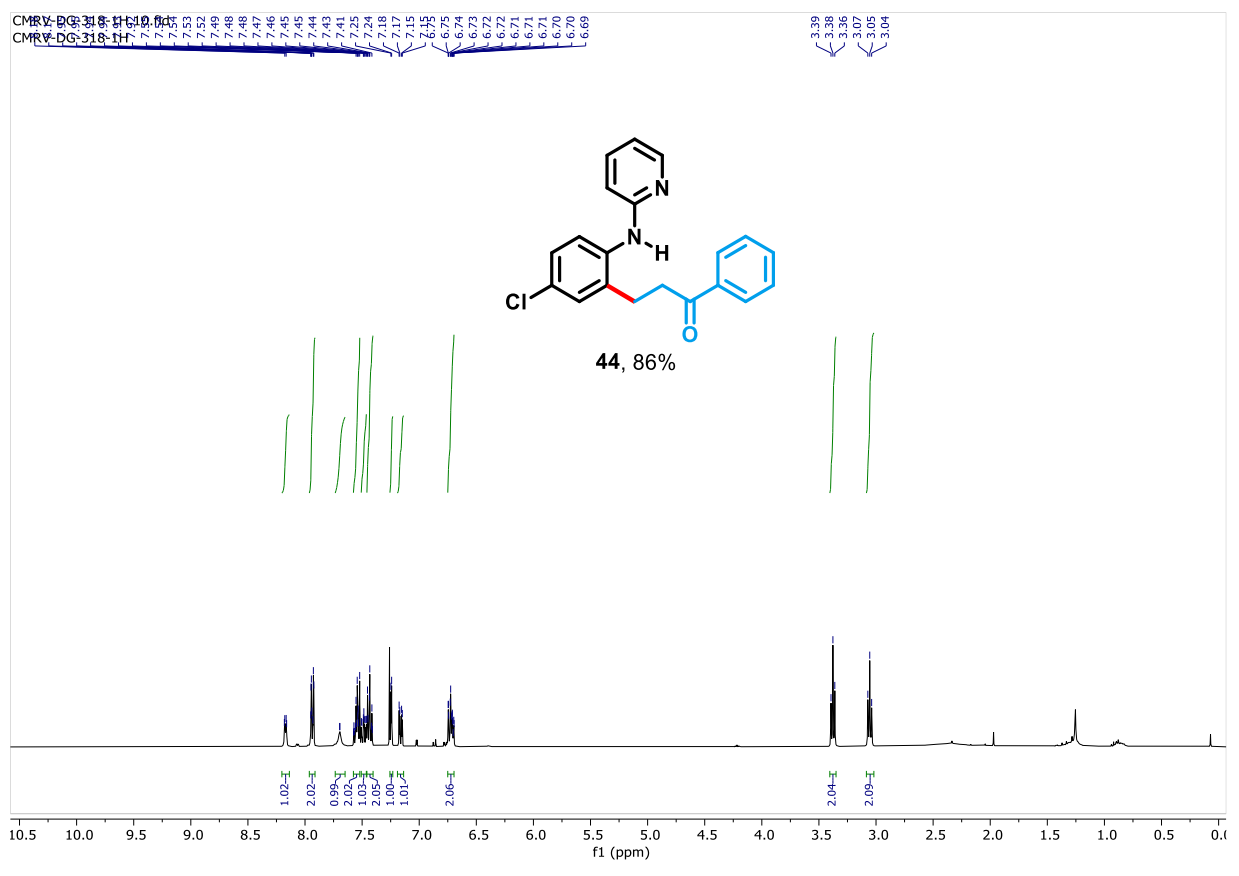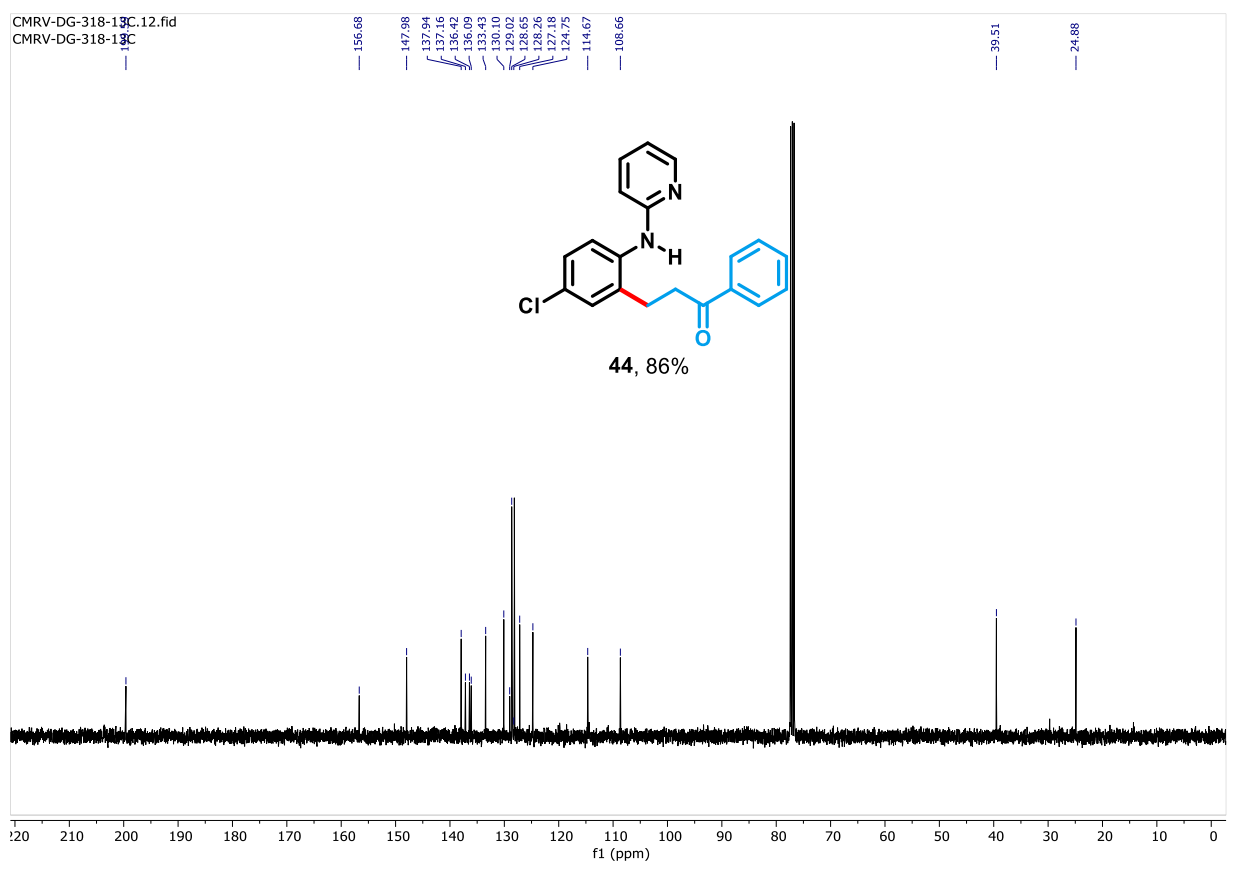

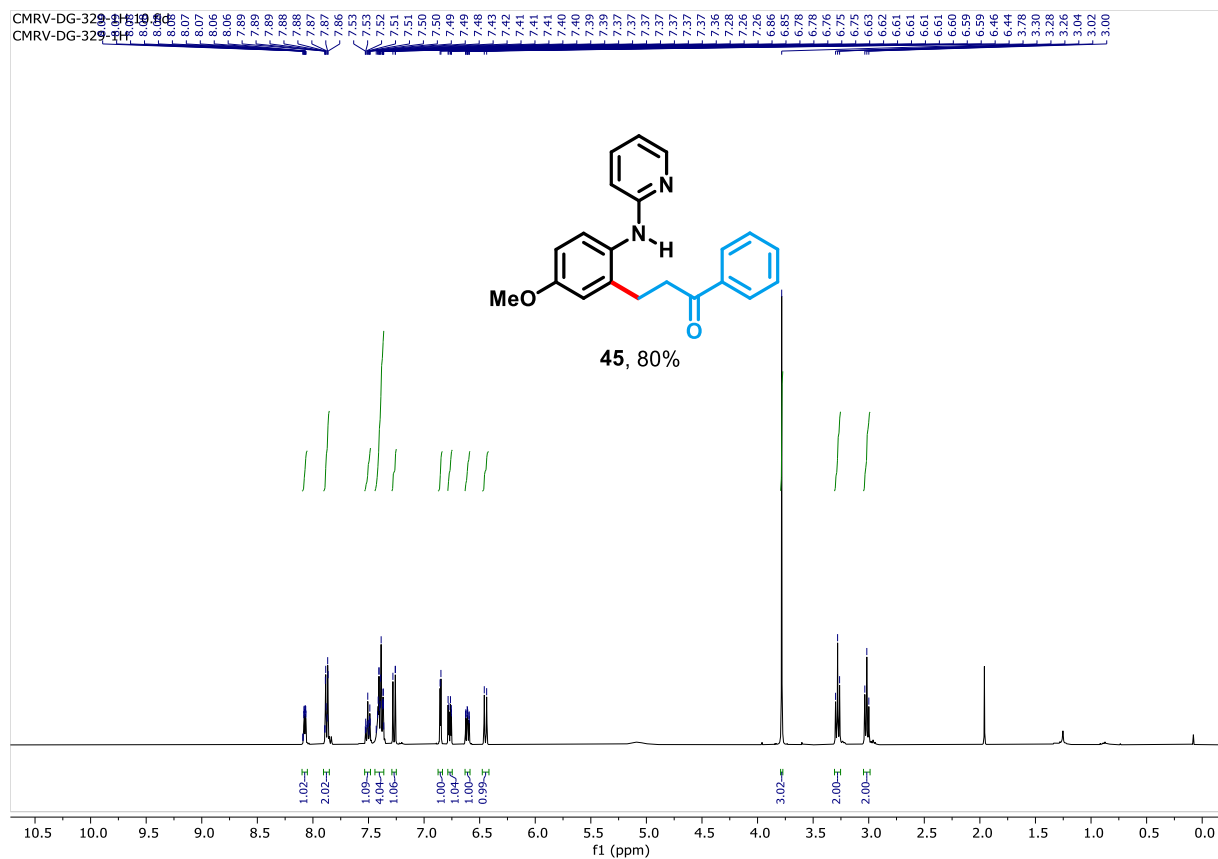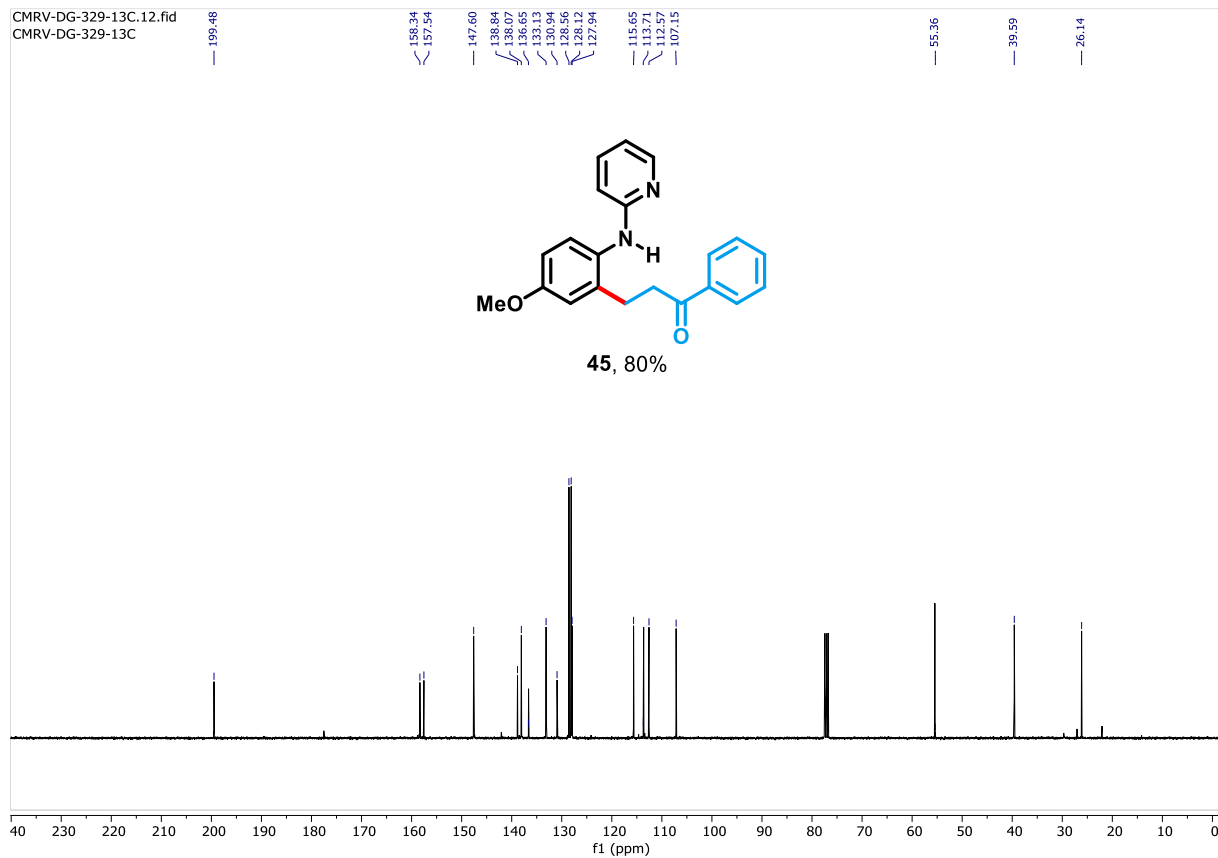

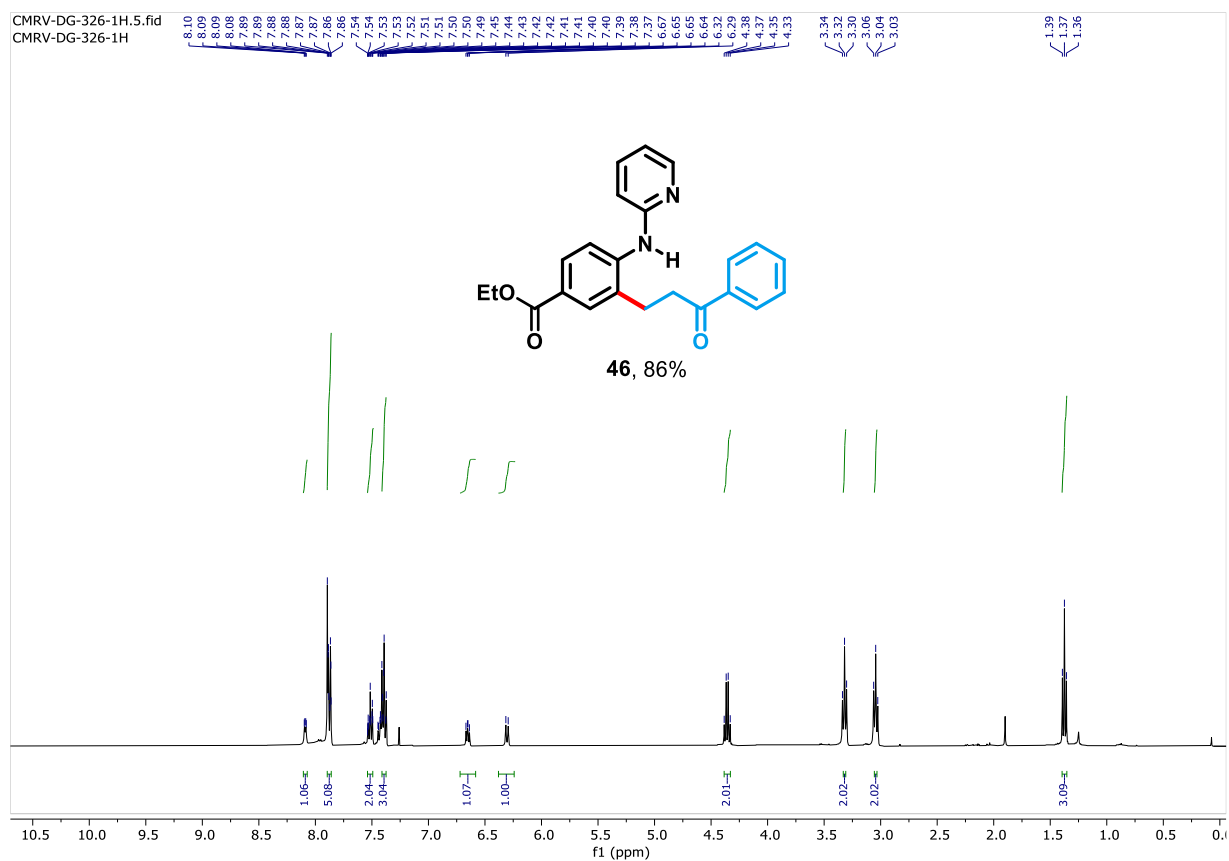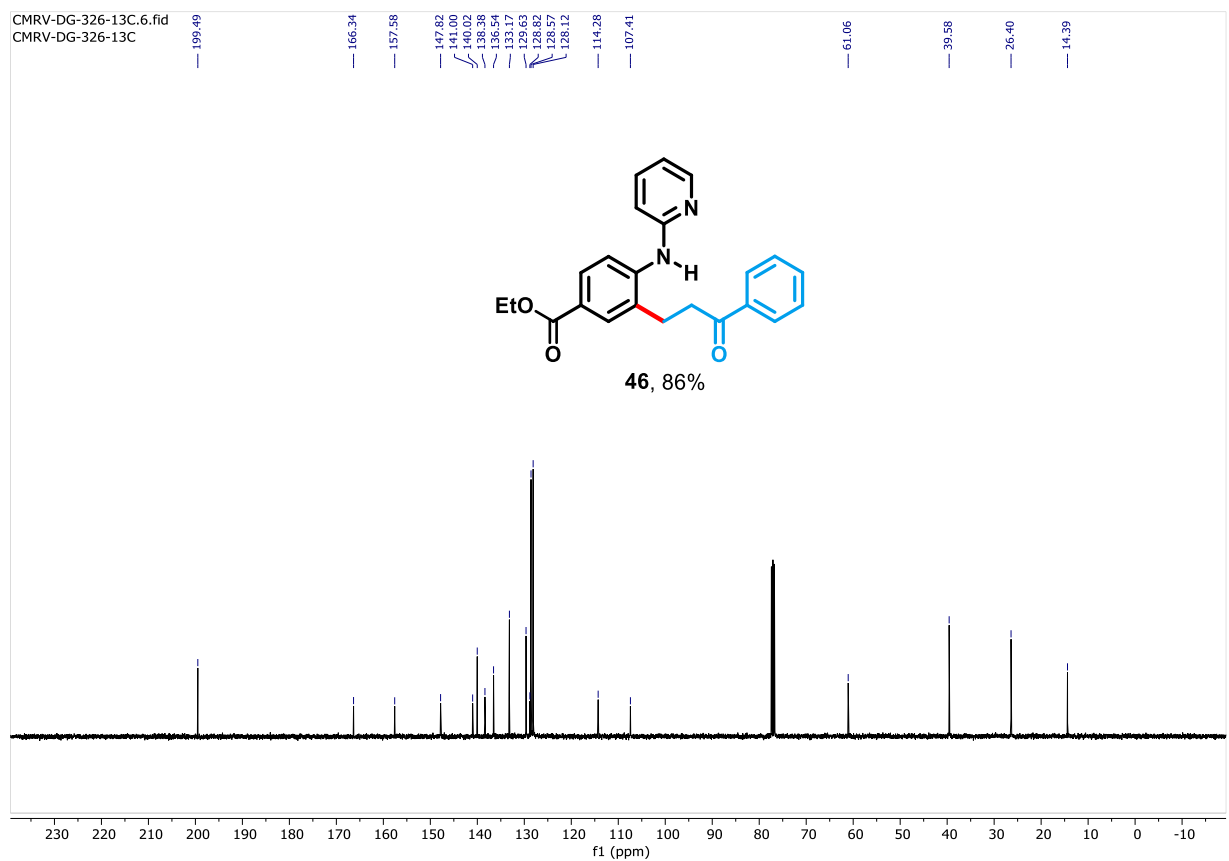

47

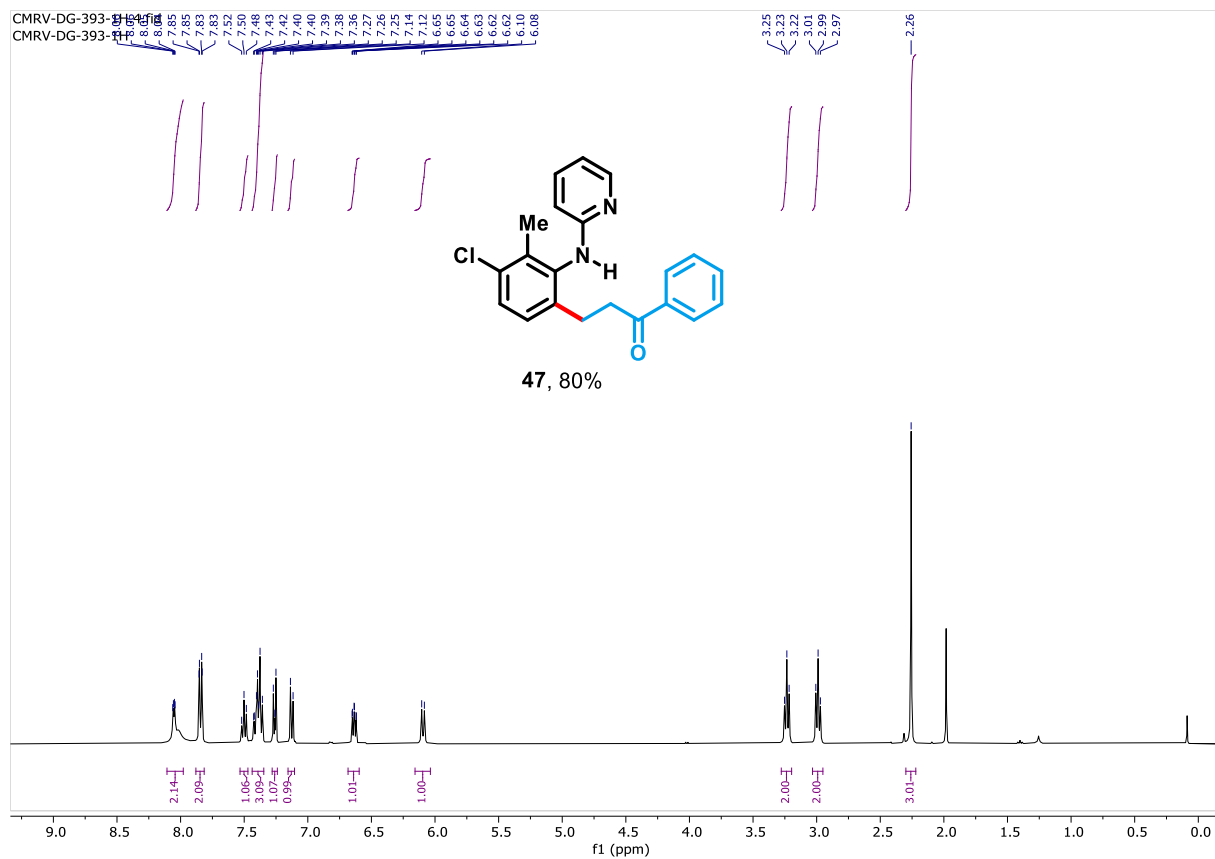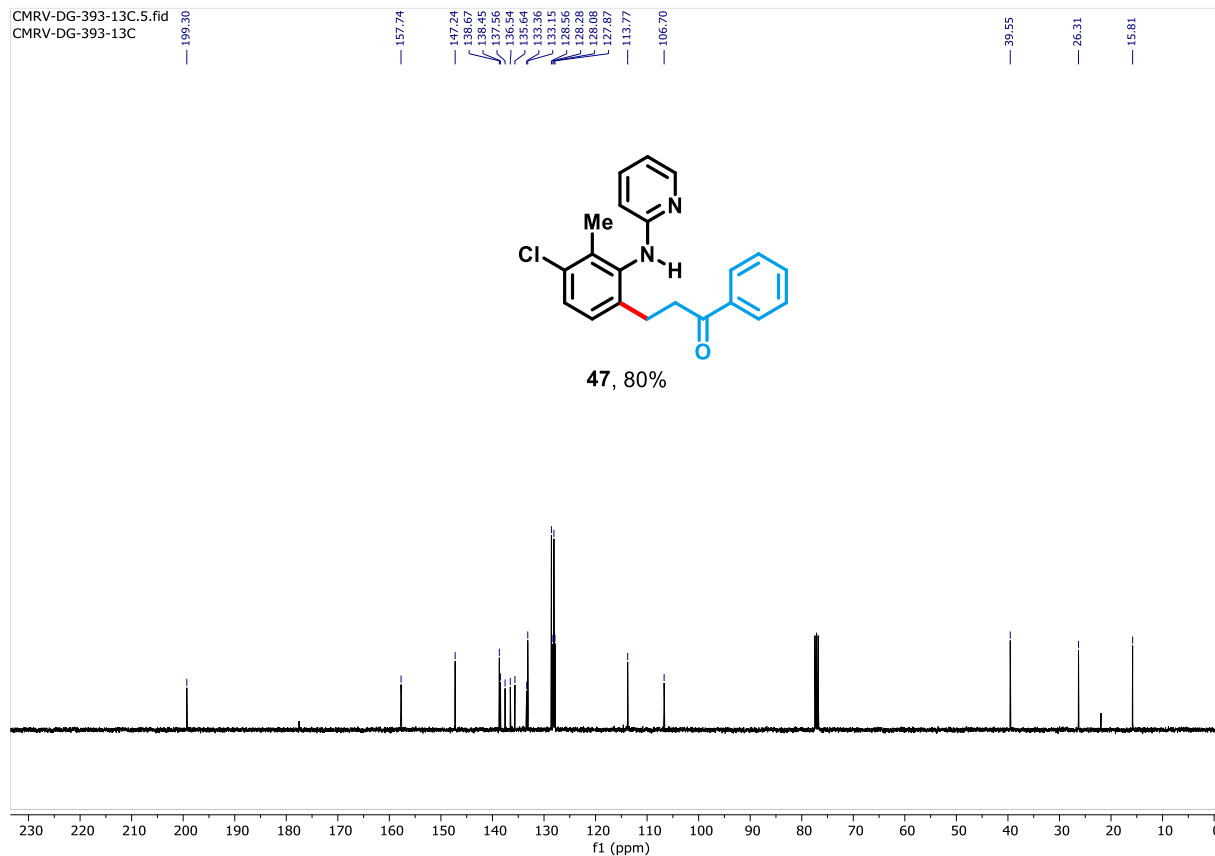

48

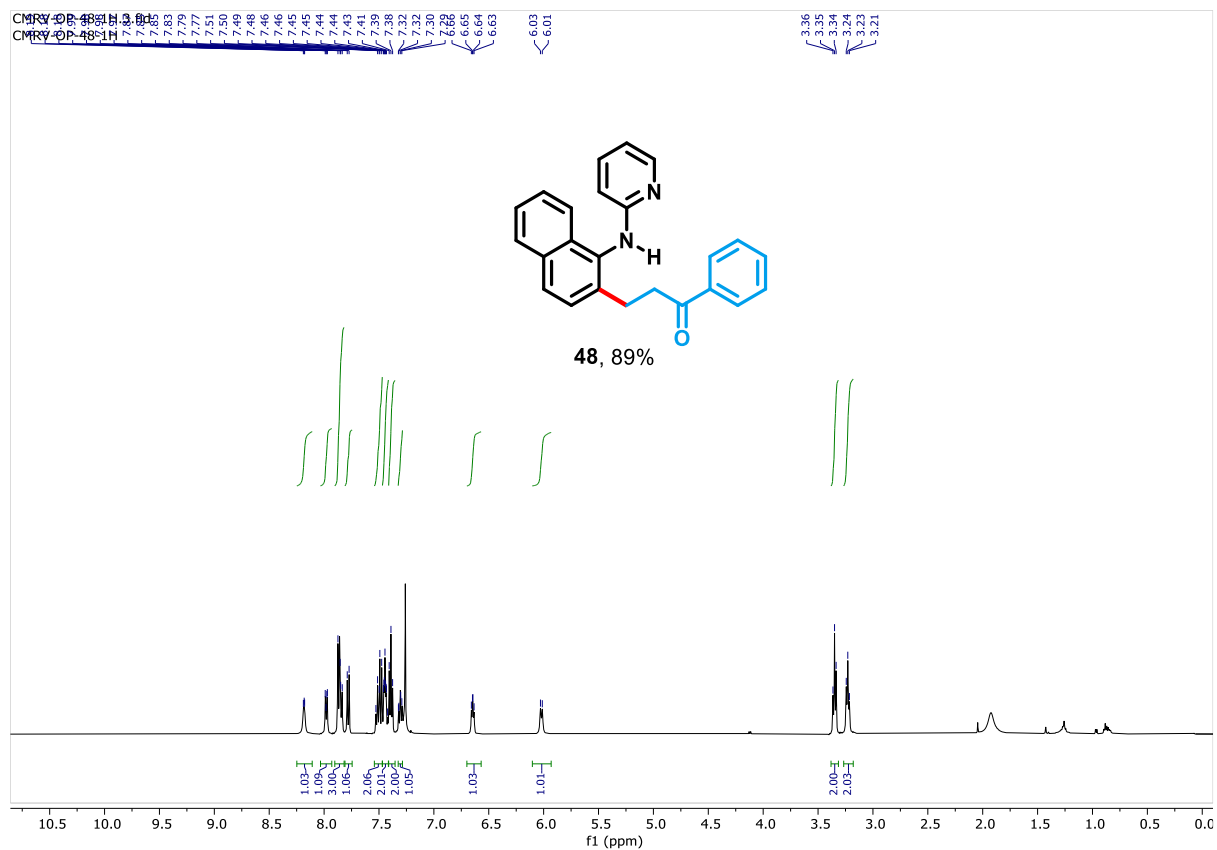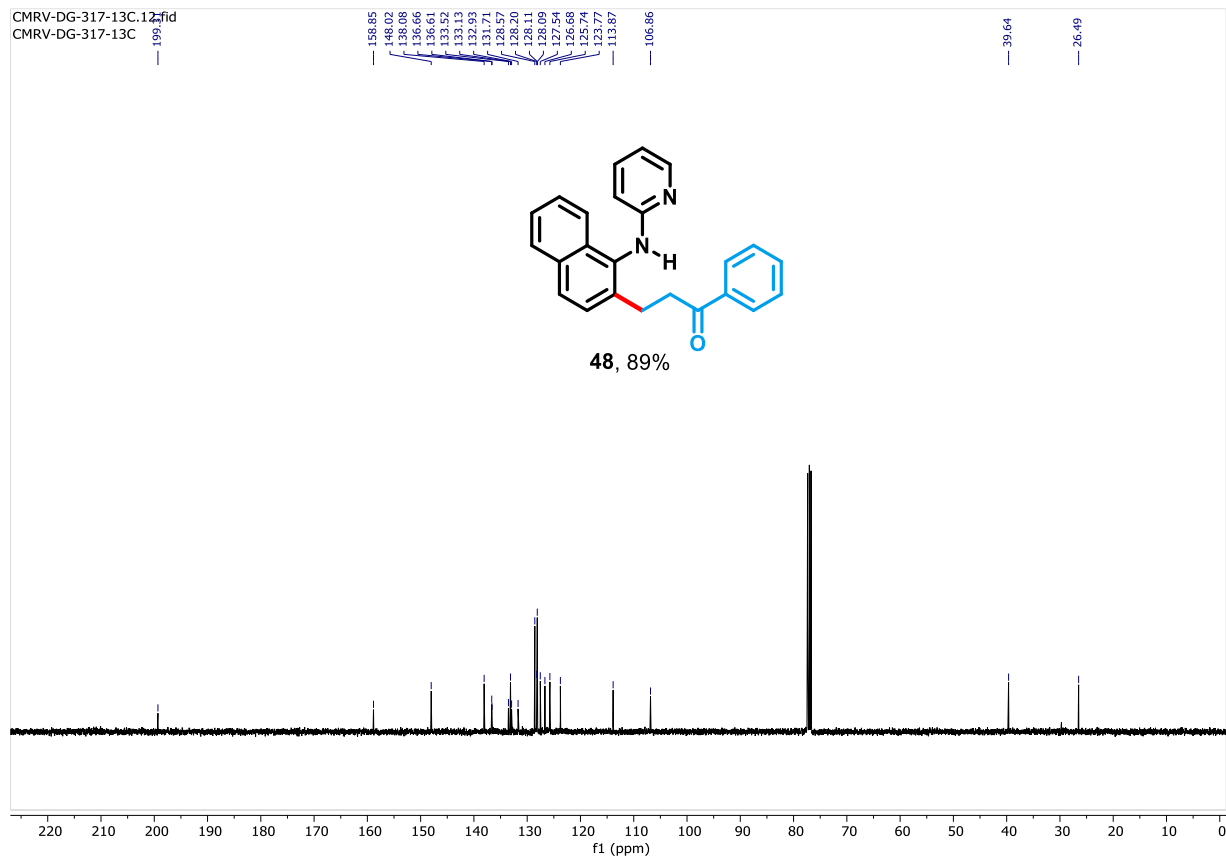



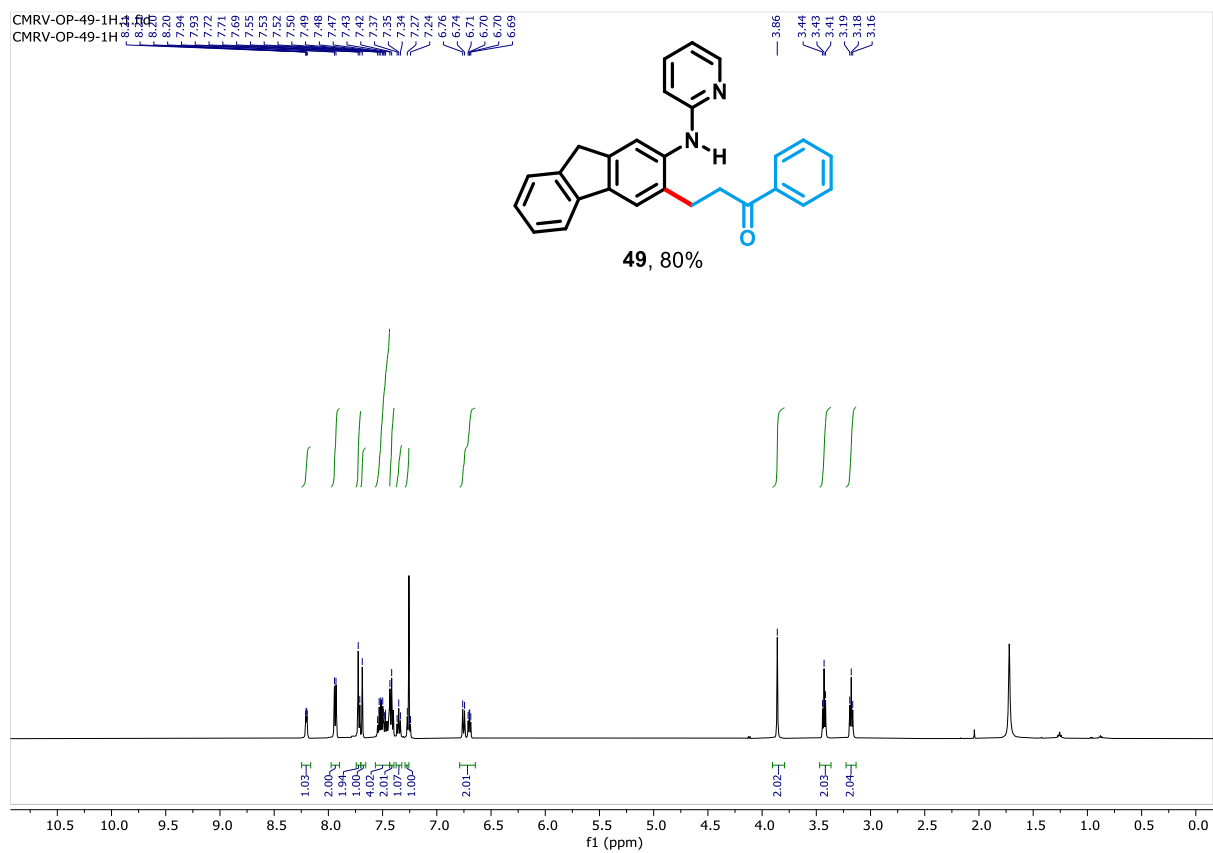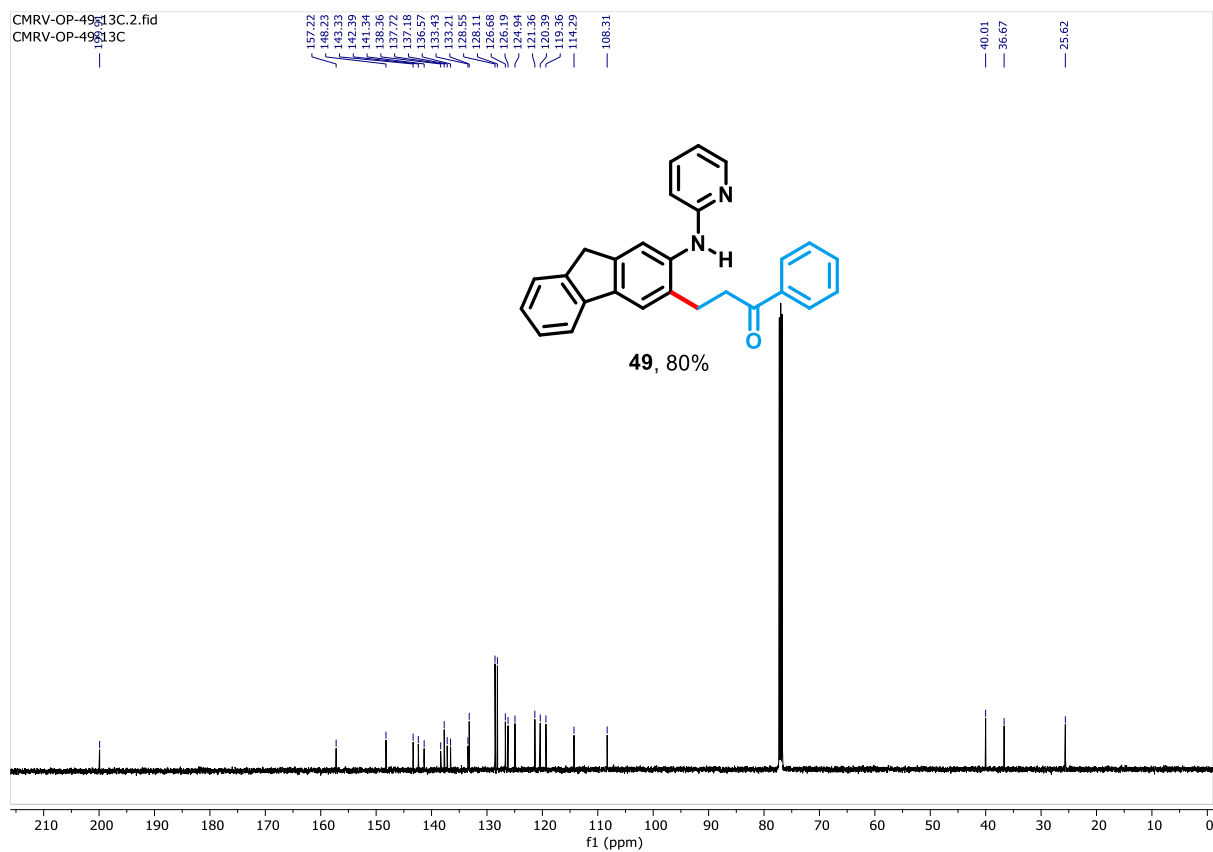

50

CMRV-DG-324-1H.10.fid  
CMRV-DG-324-1H

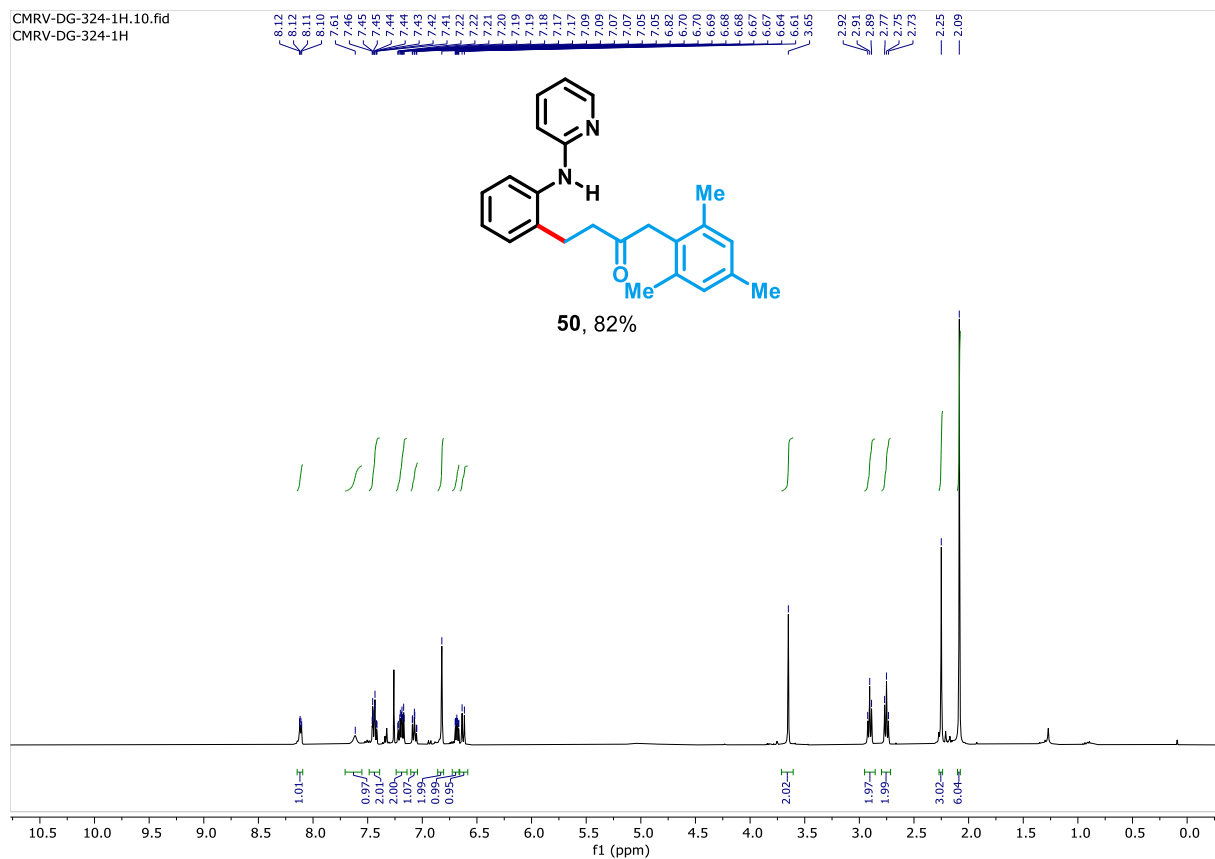

CMRV-DG-324-13C.12.fid  
CMRV-DG-324-13C

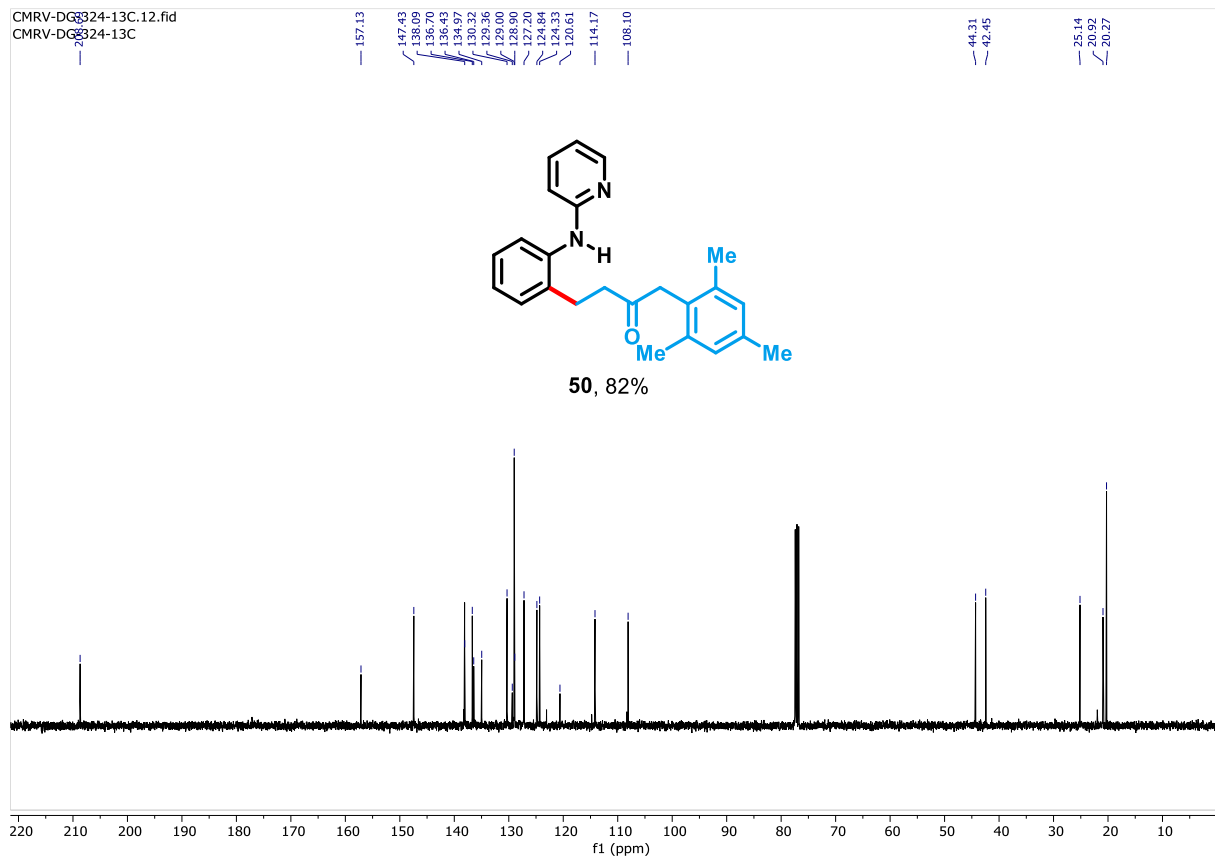

# 51

CMRV-DG-327-1H.7.fid  
CMRV-DG-327-1H

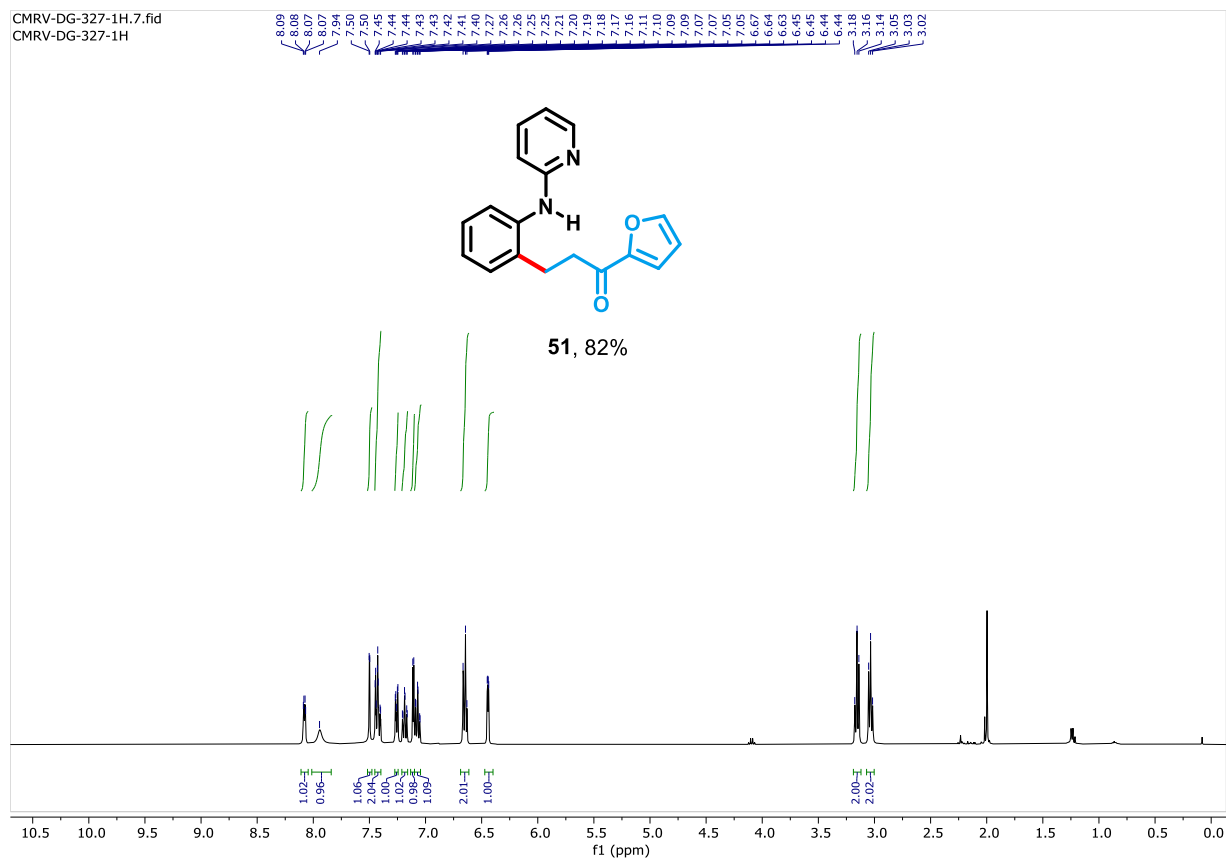

CMRV-DG-327-13C.8.fid  
CMRV-DG-327-13C

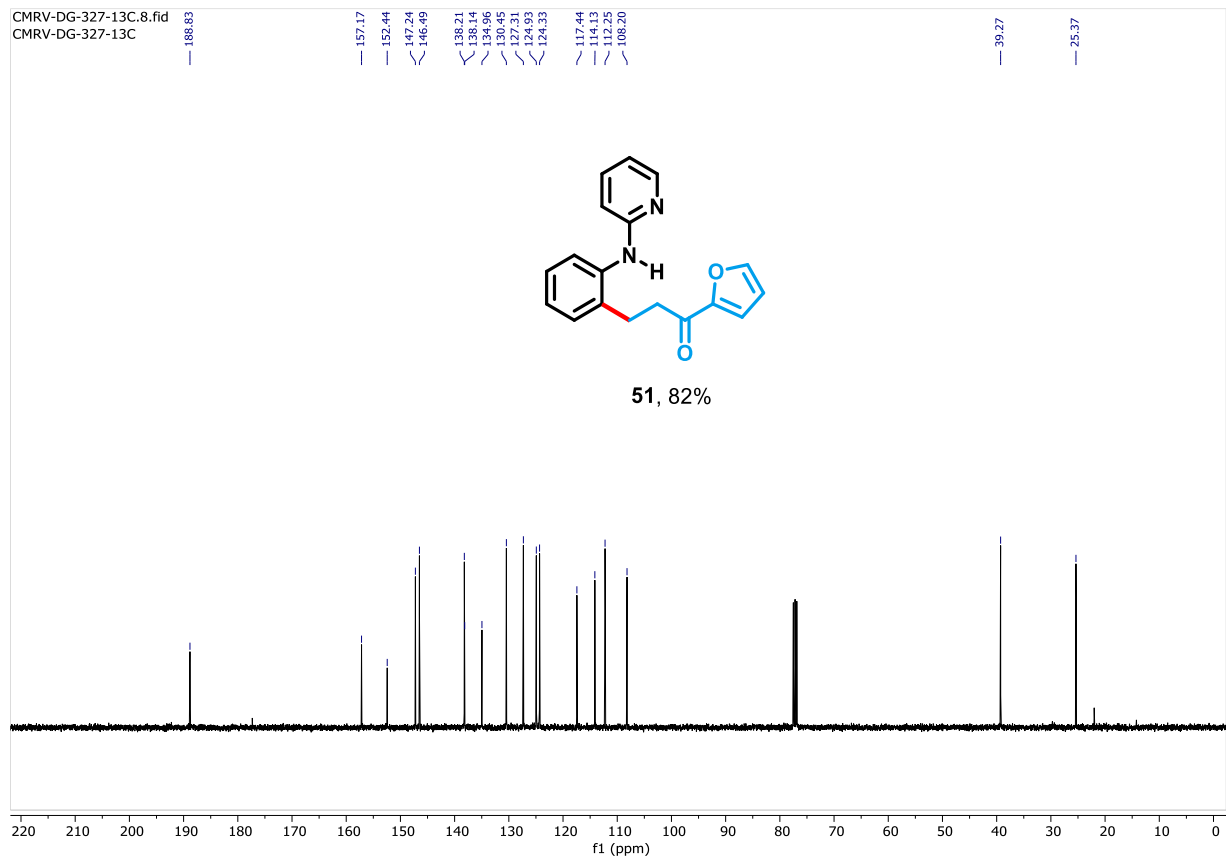

52

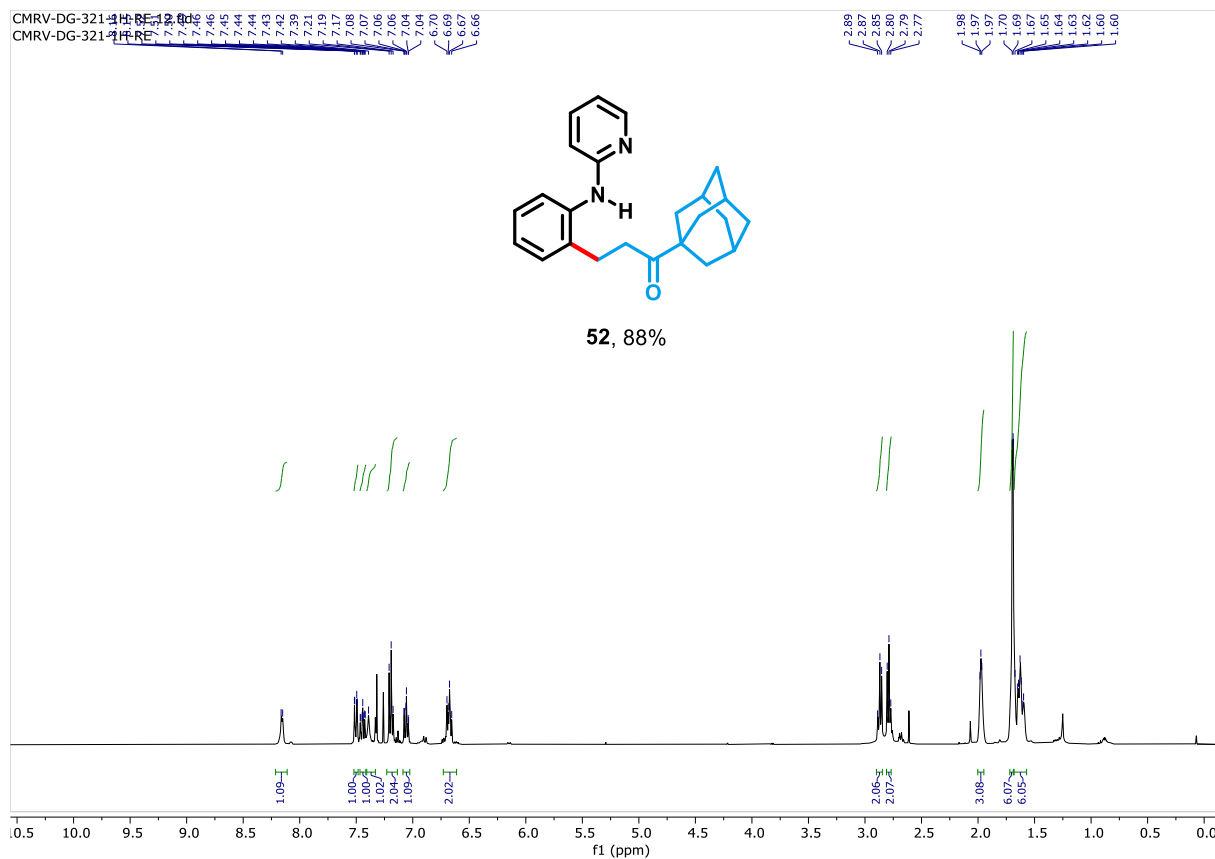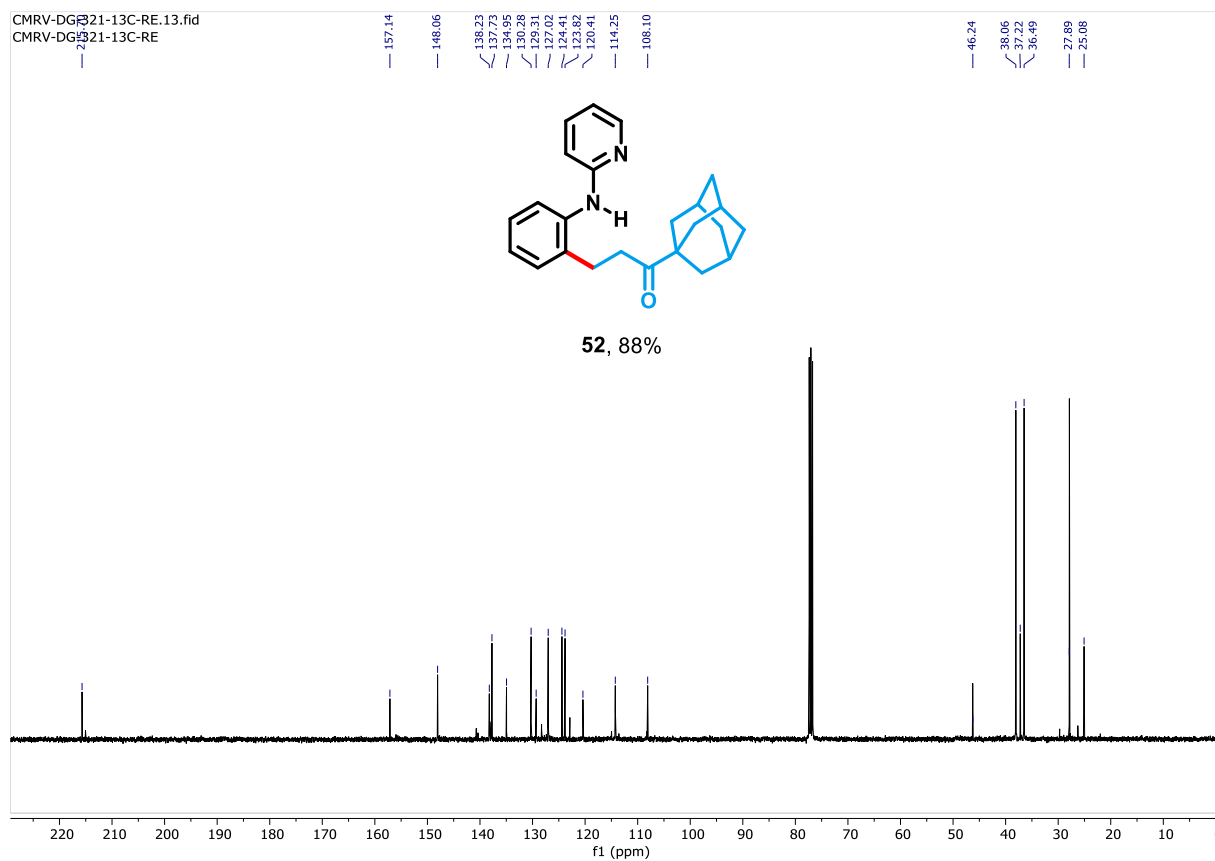

53

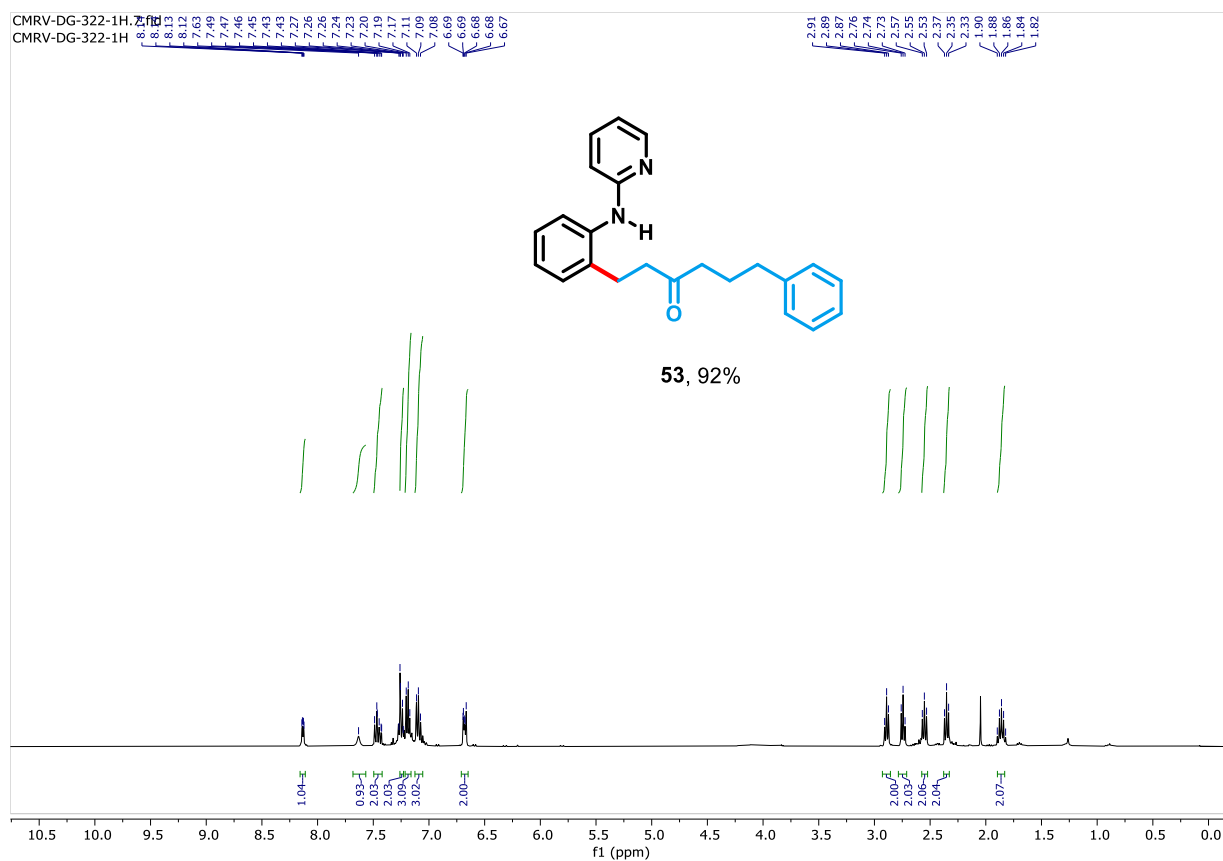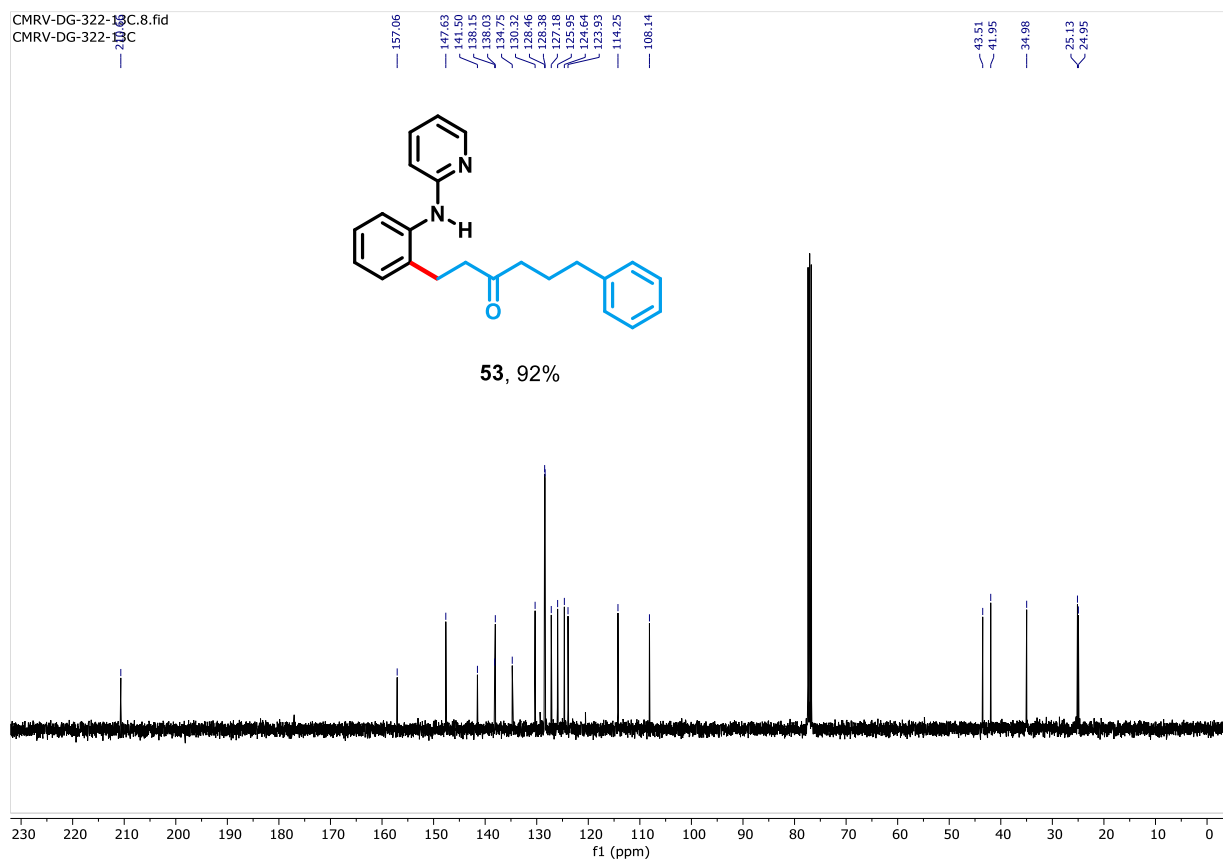

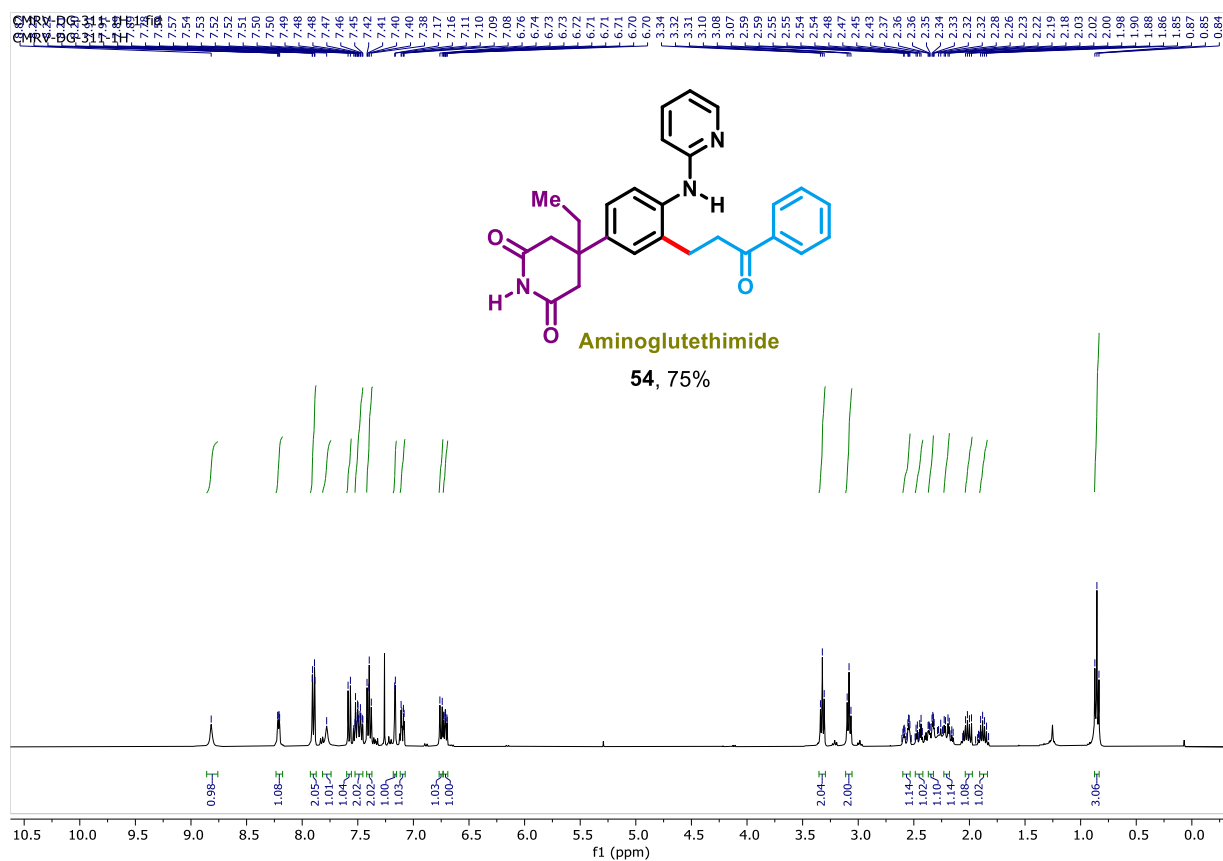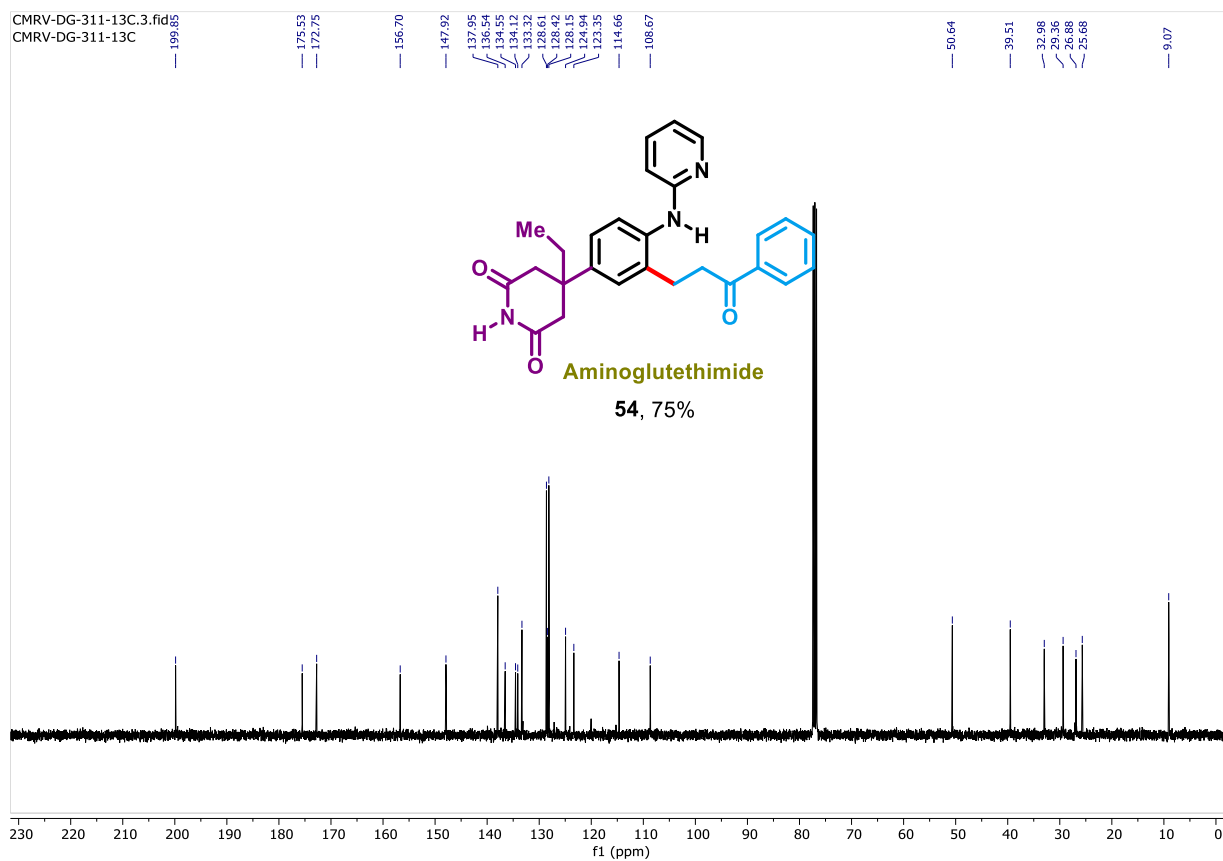

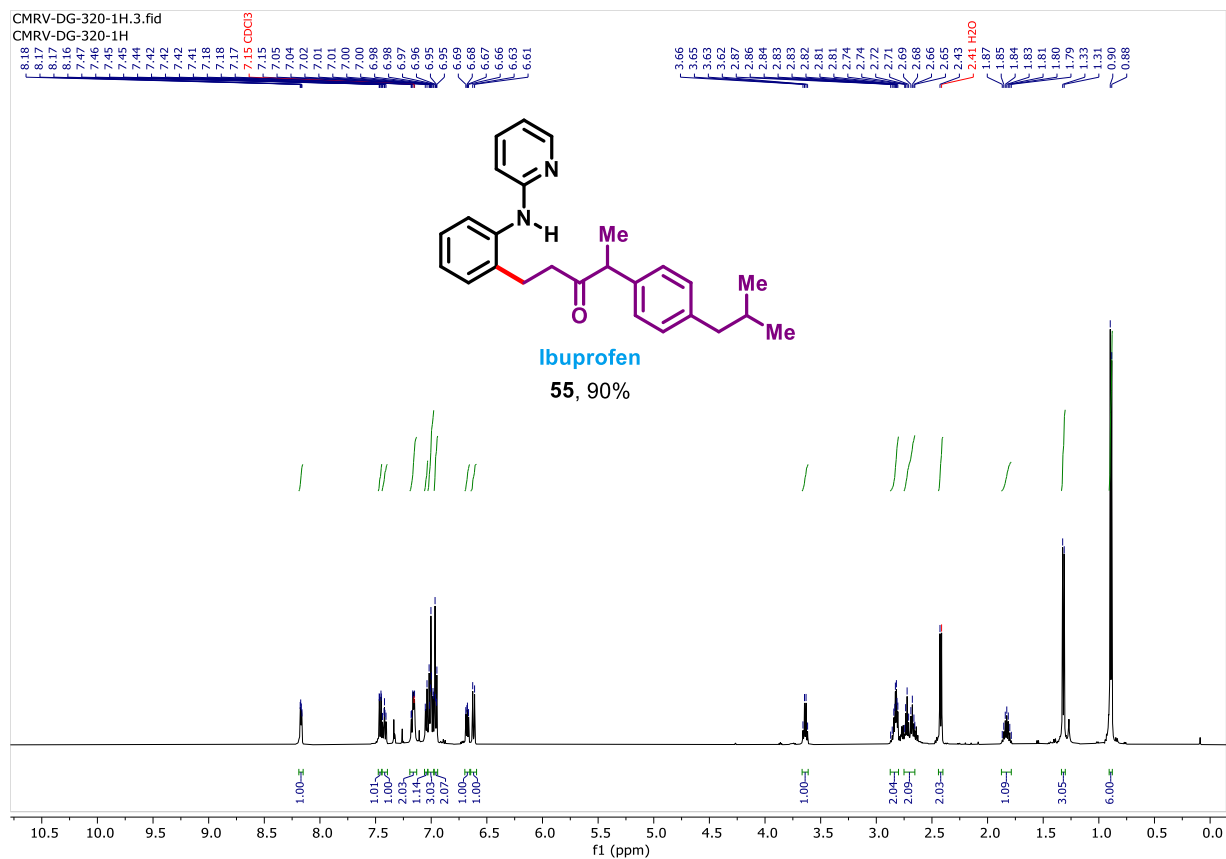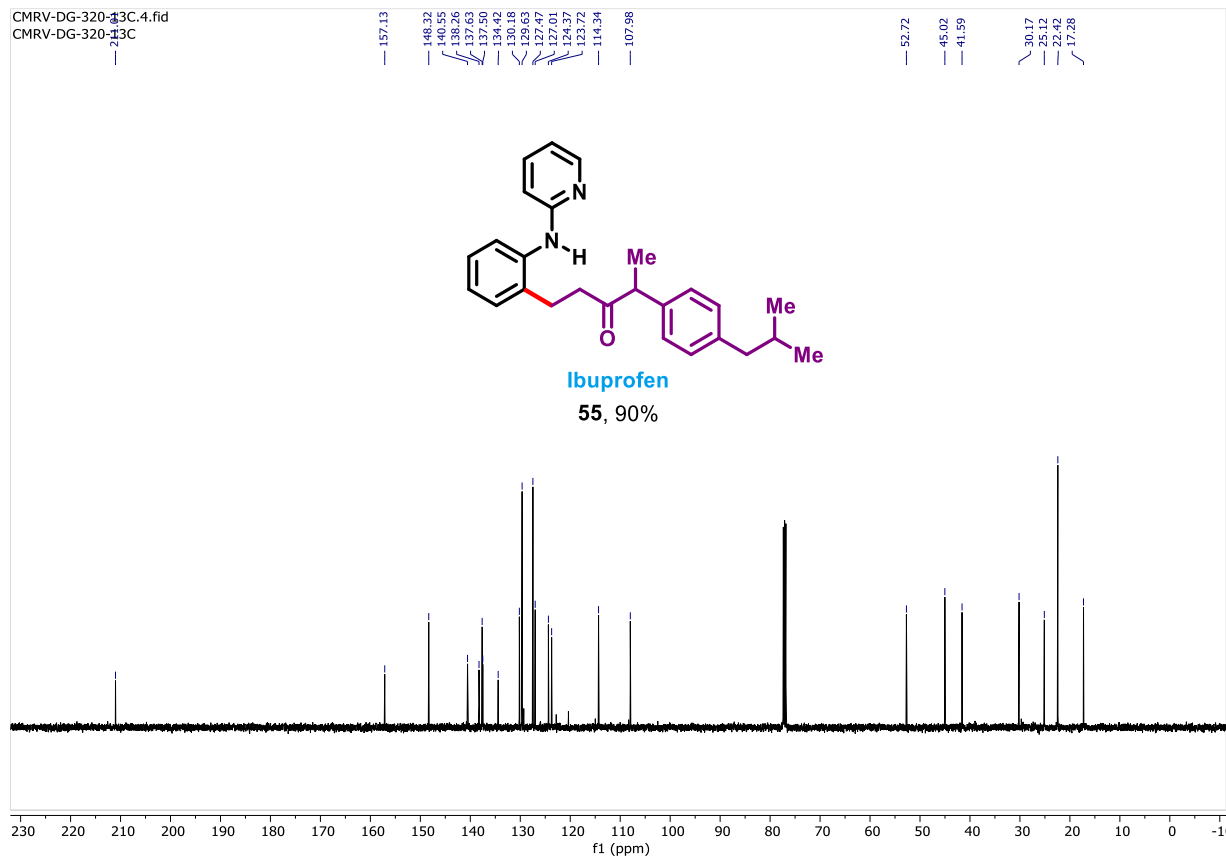

56

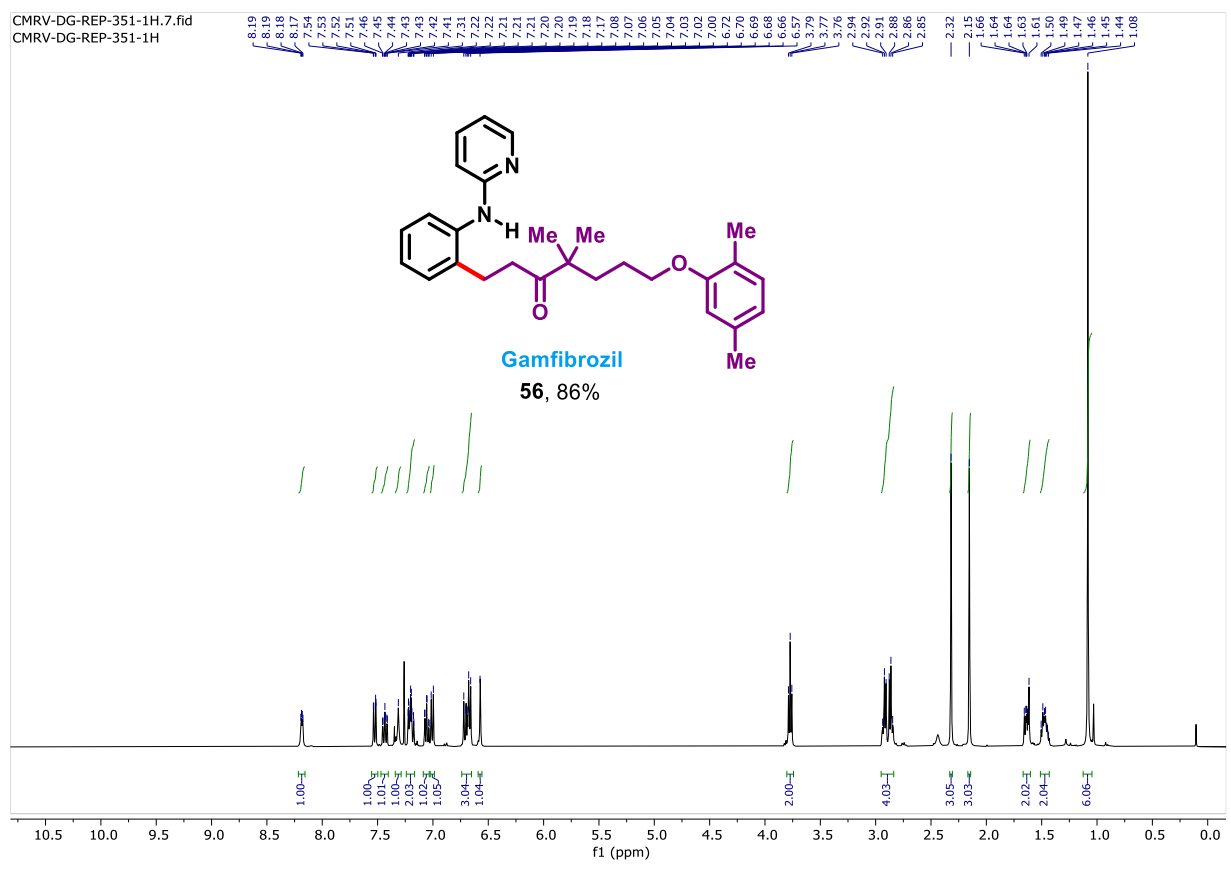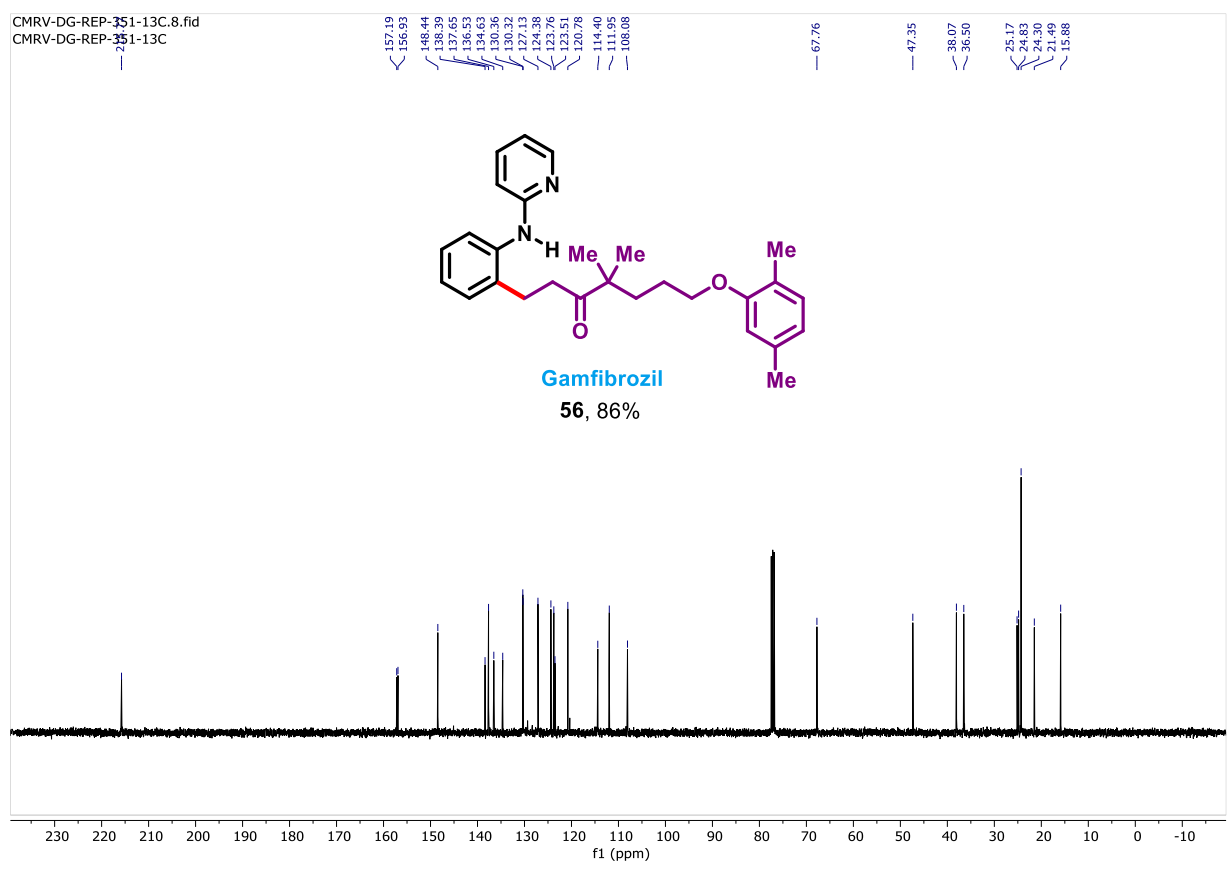



57

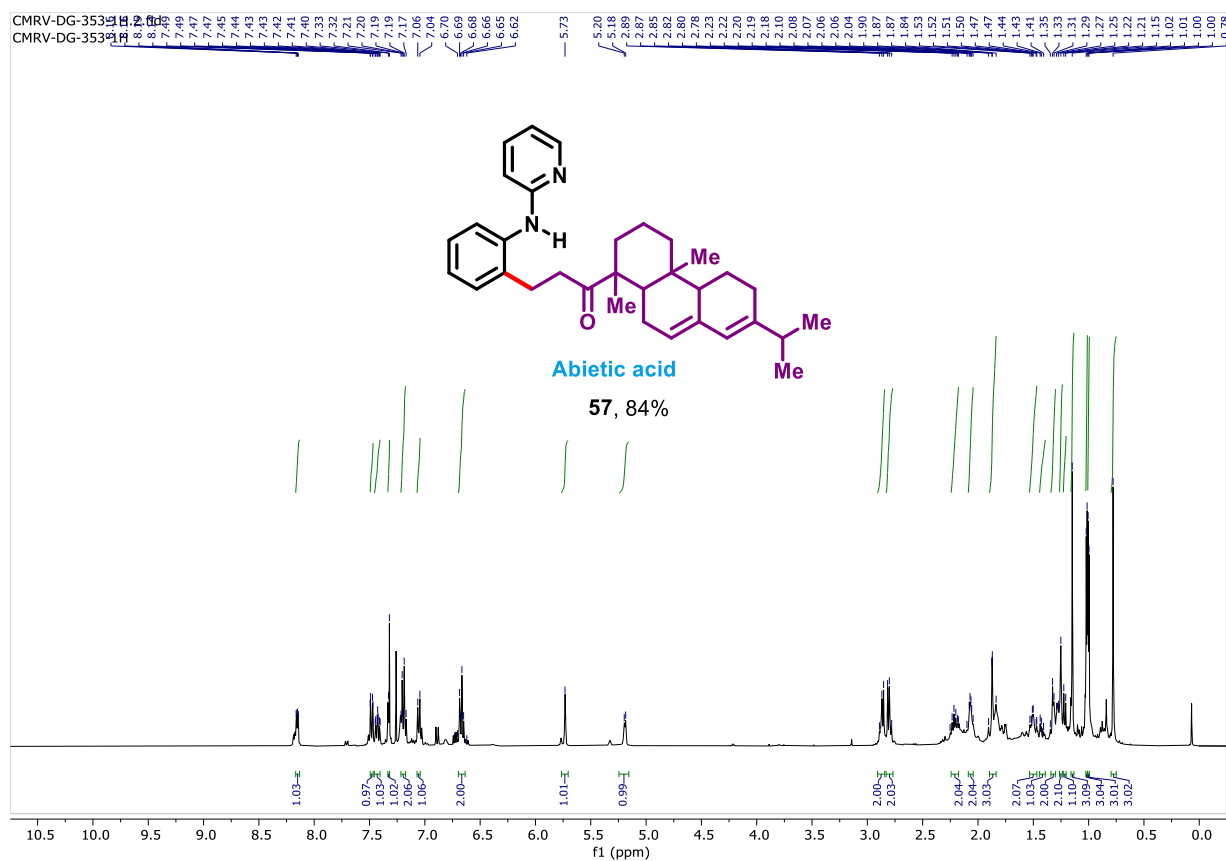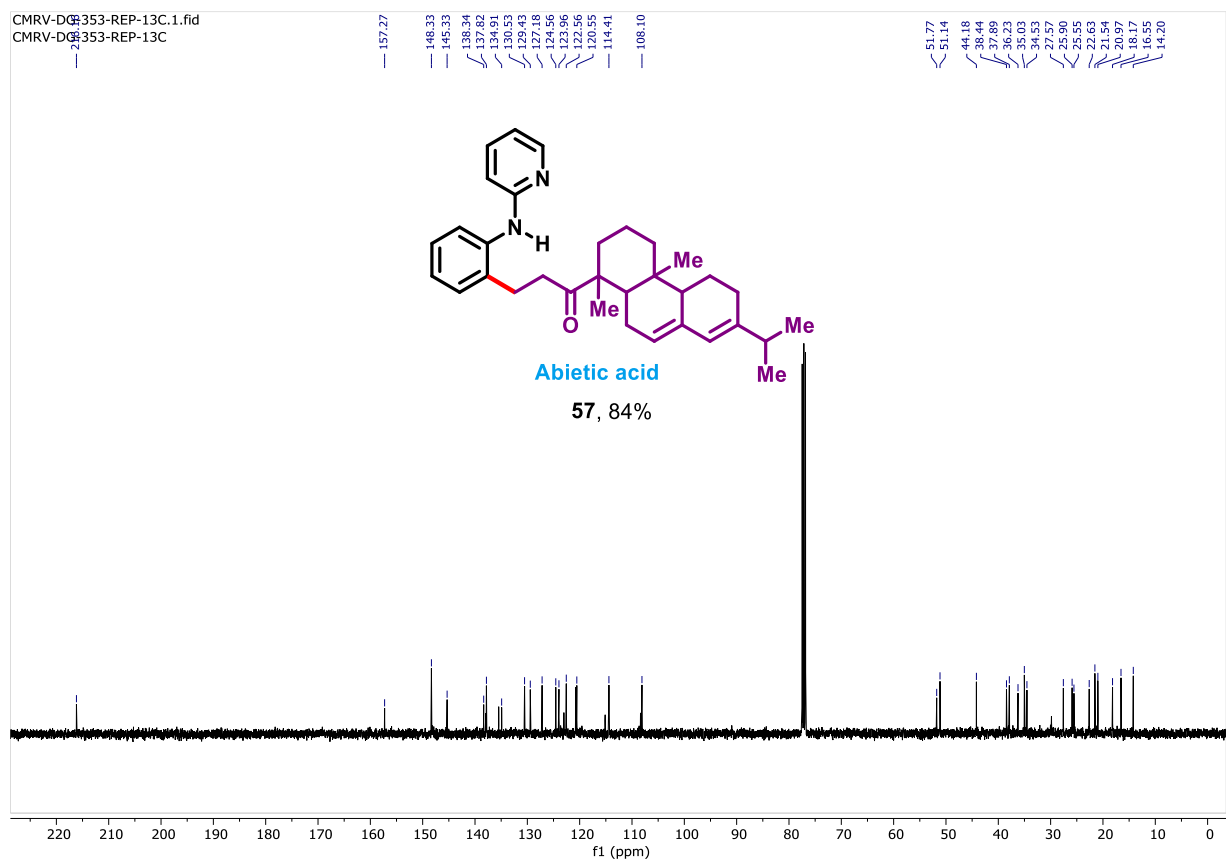

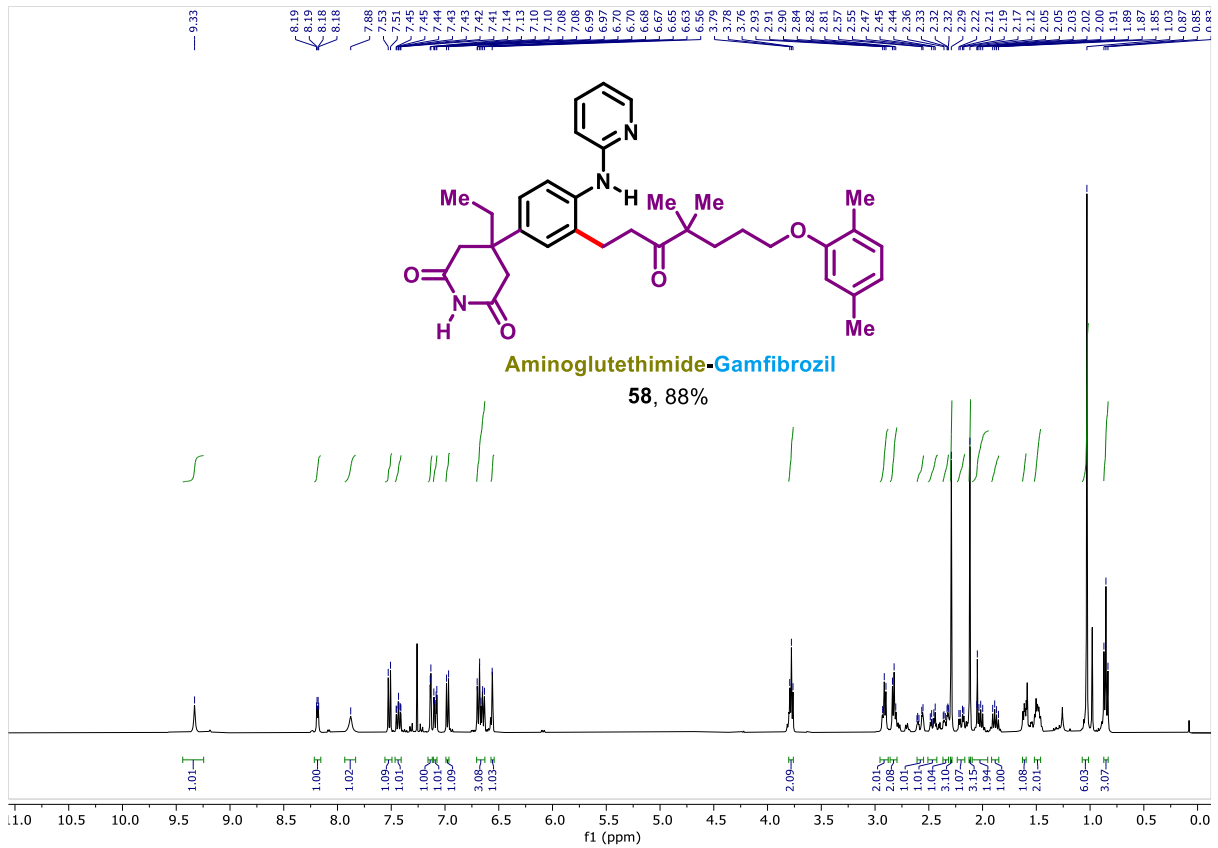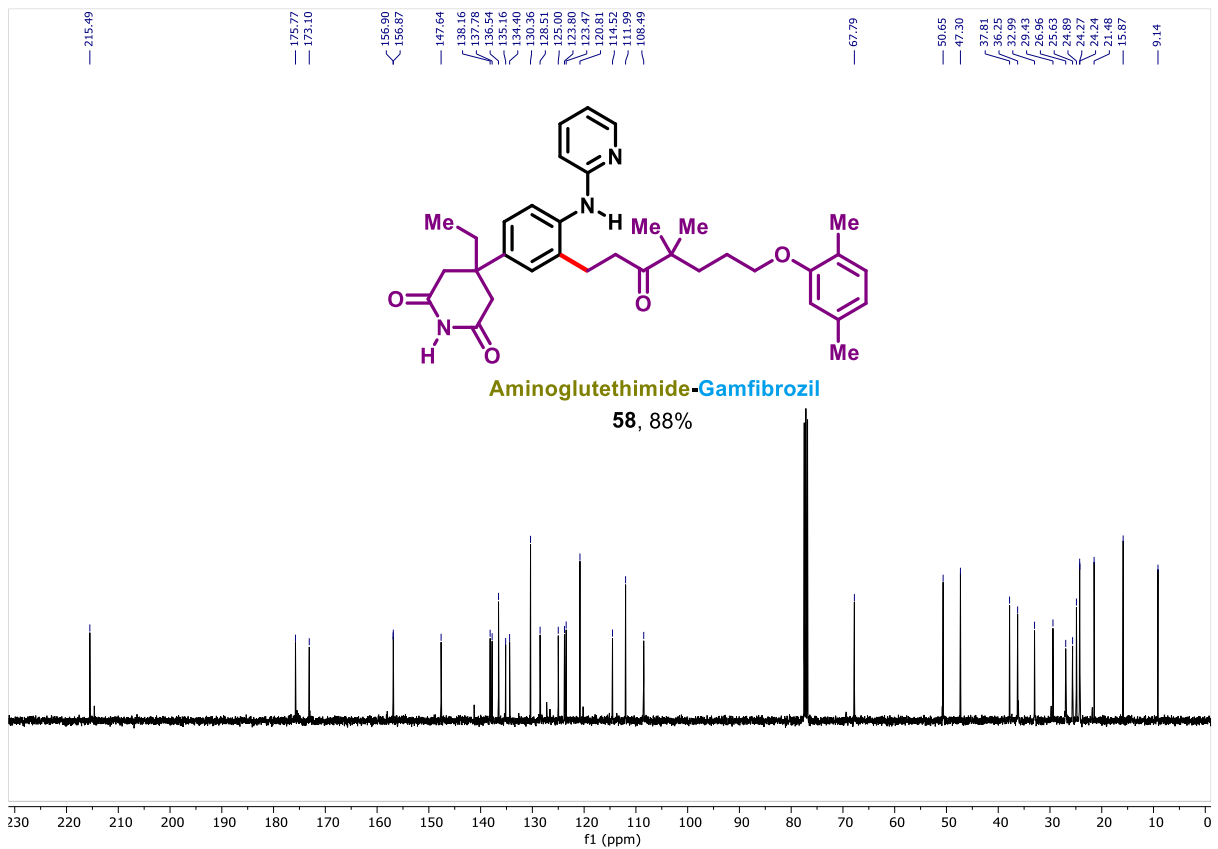

61

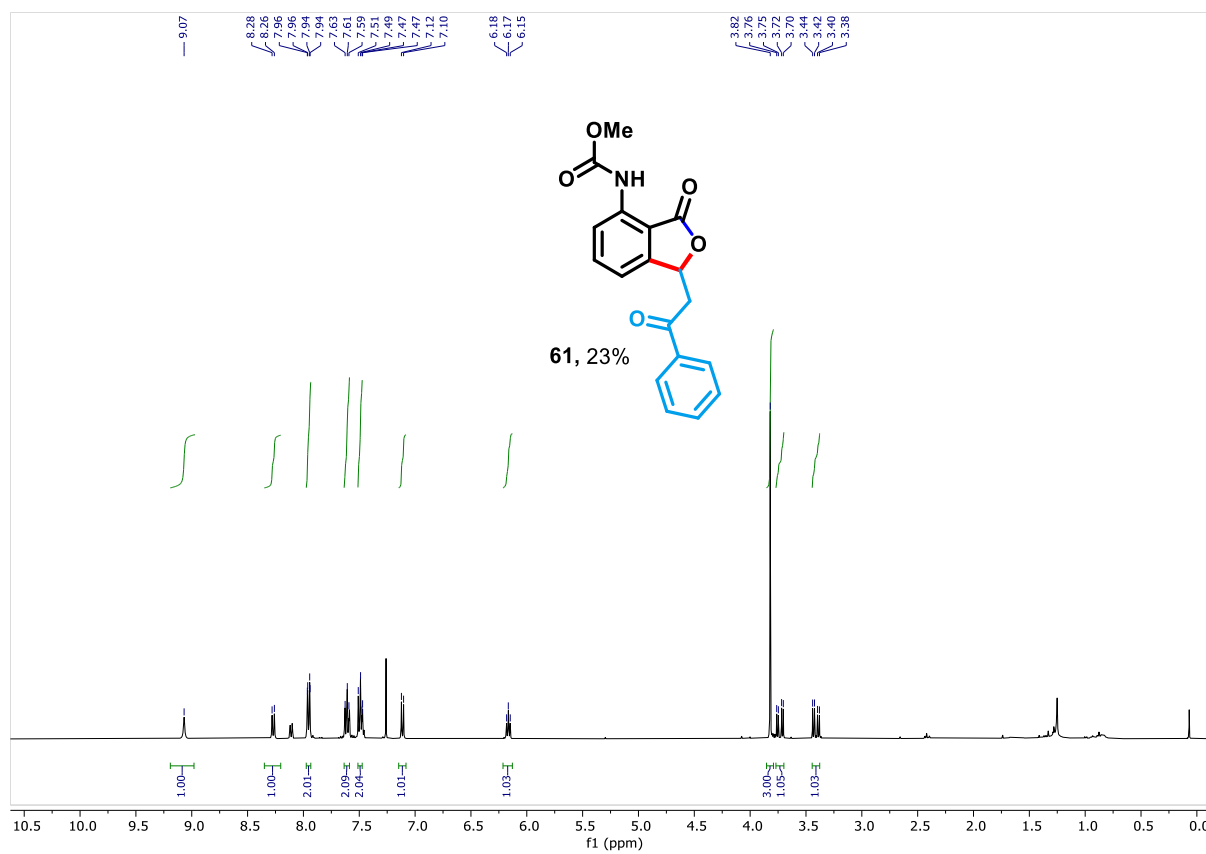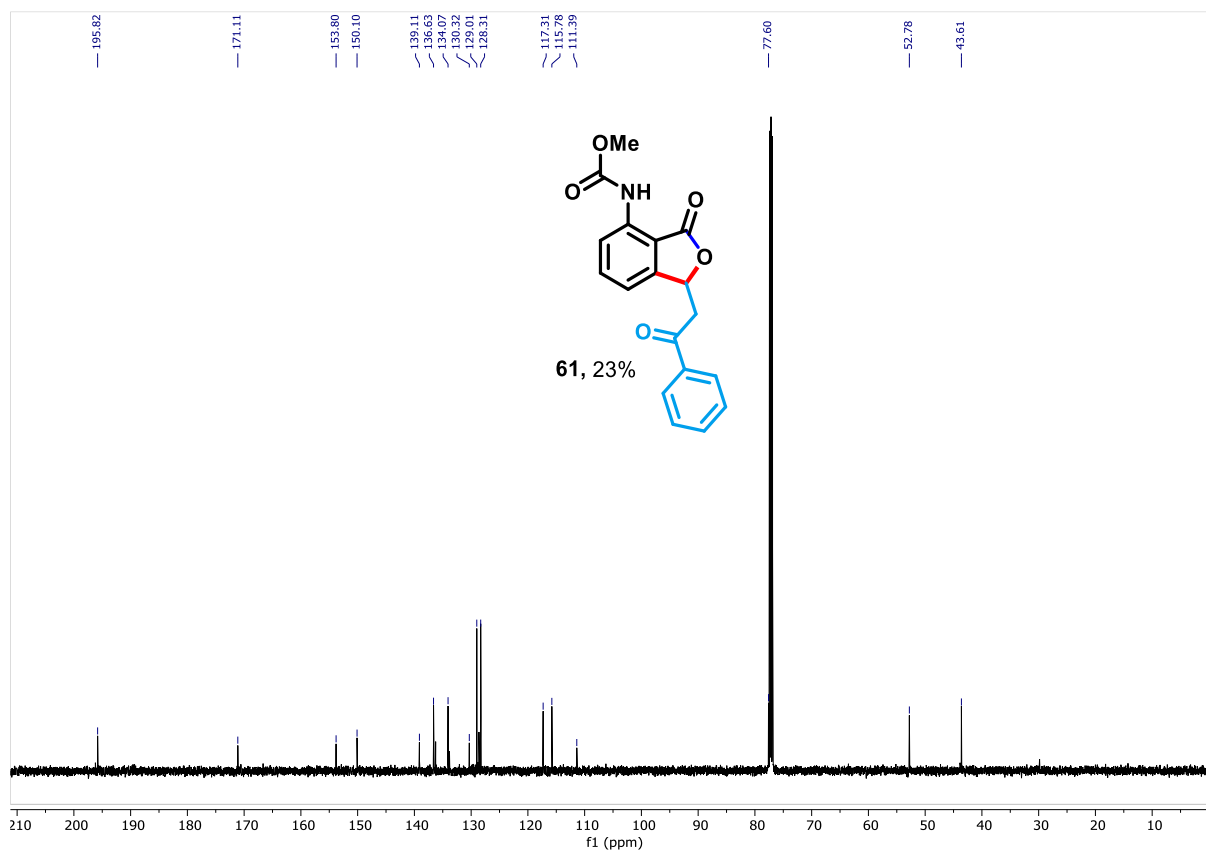

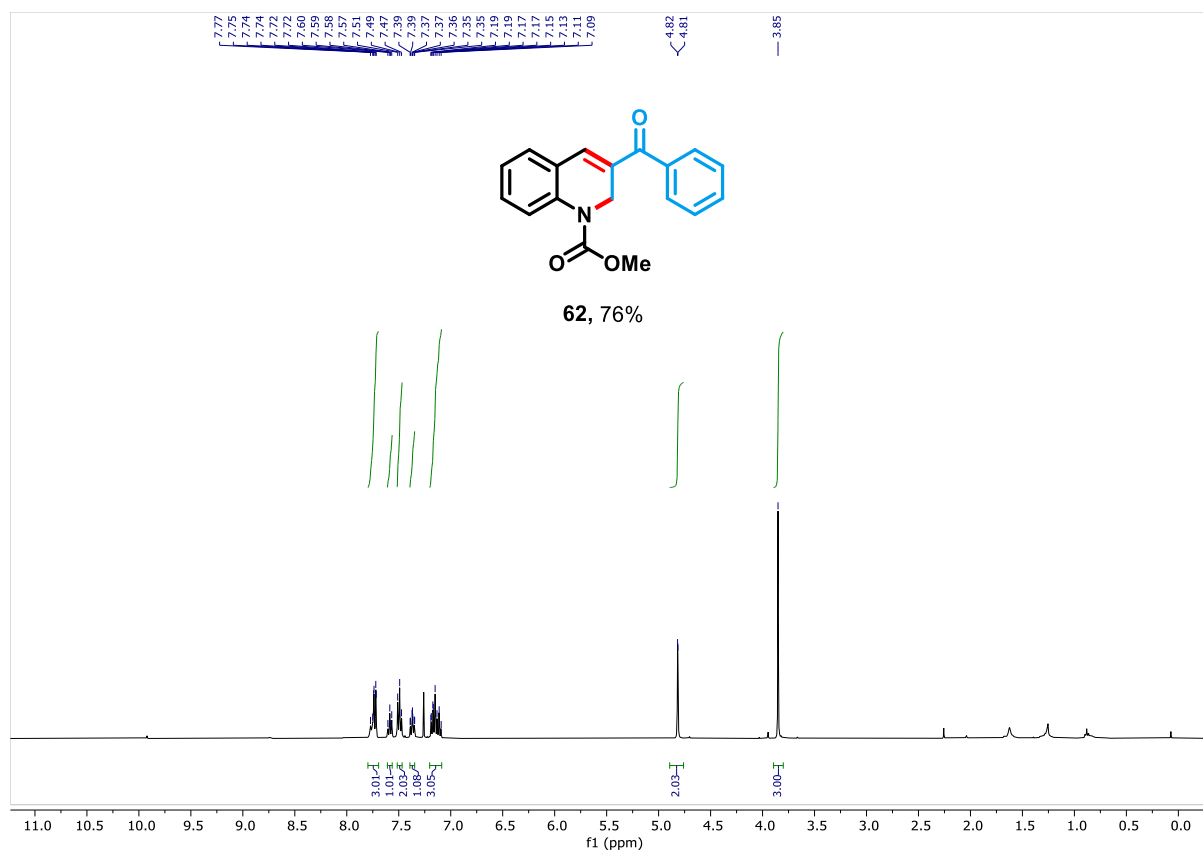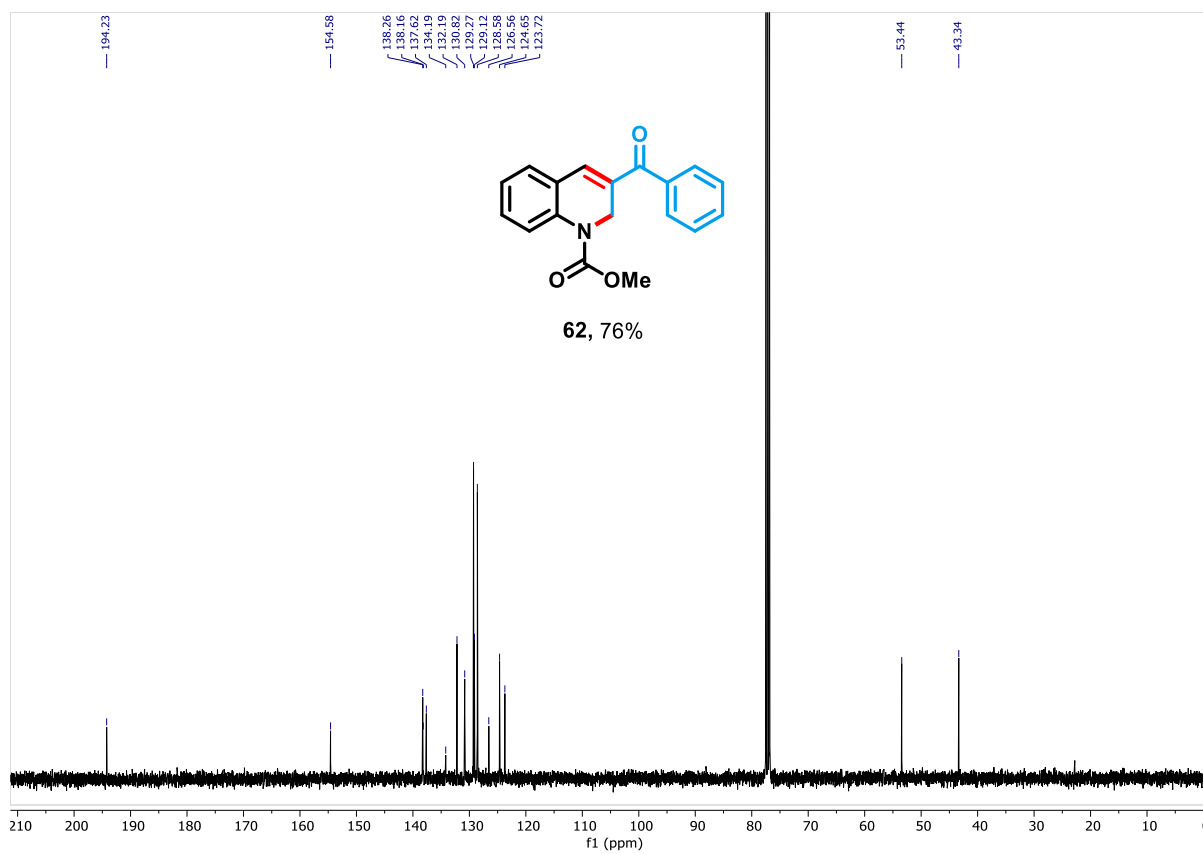

63

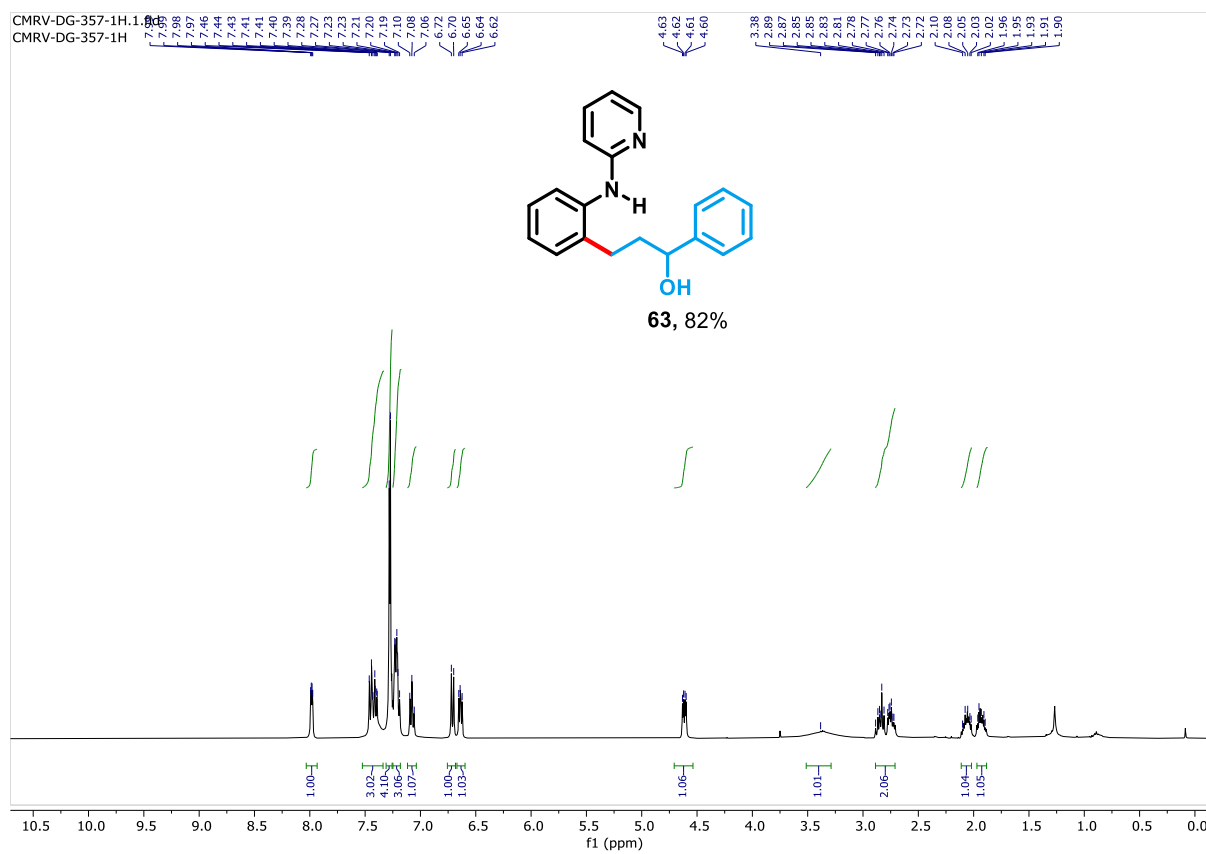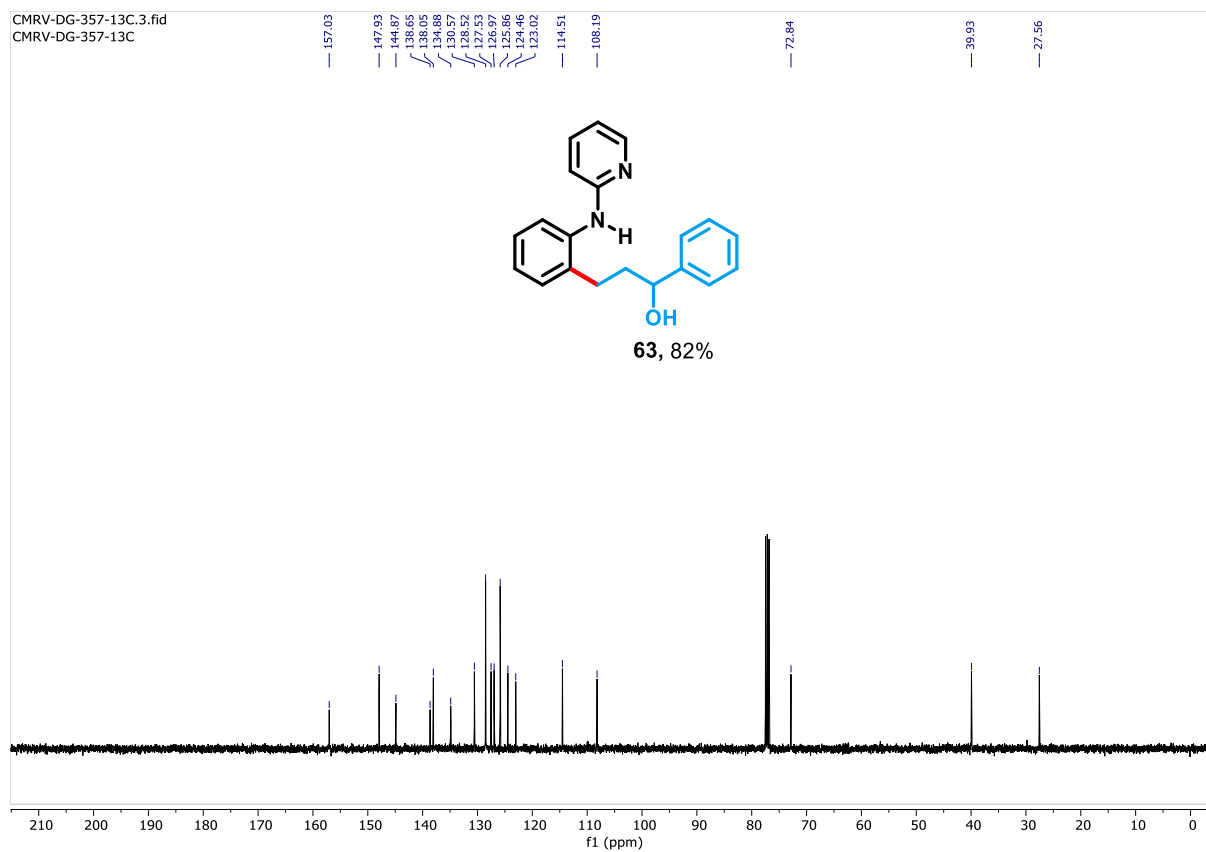

64

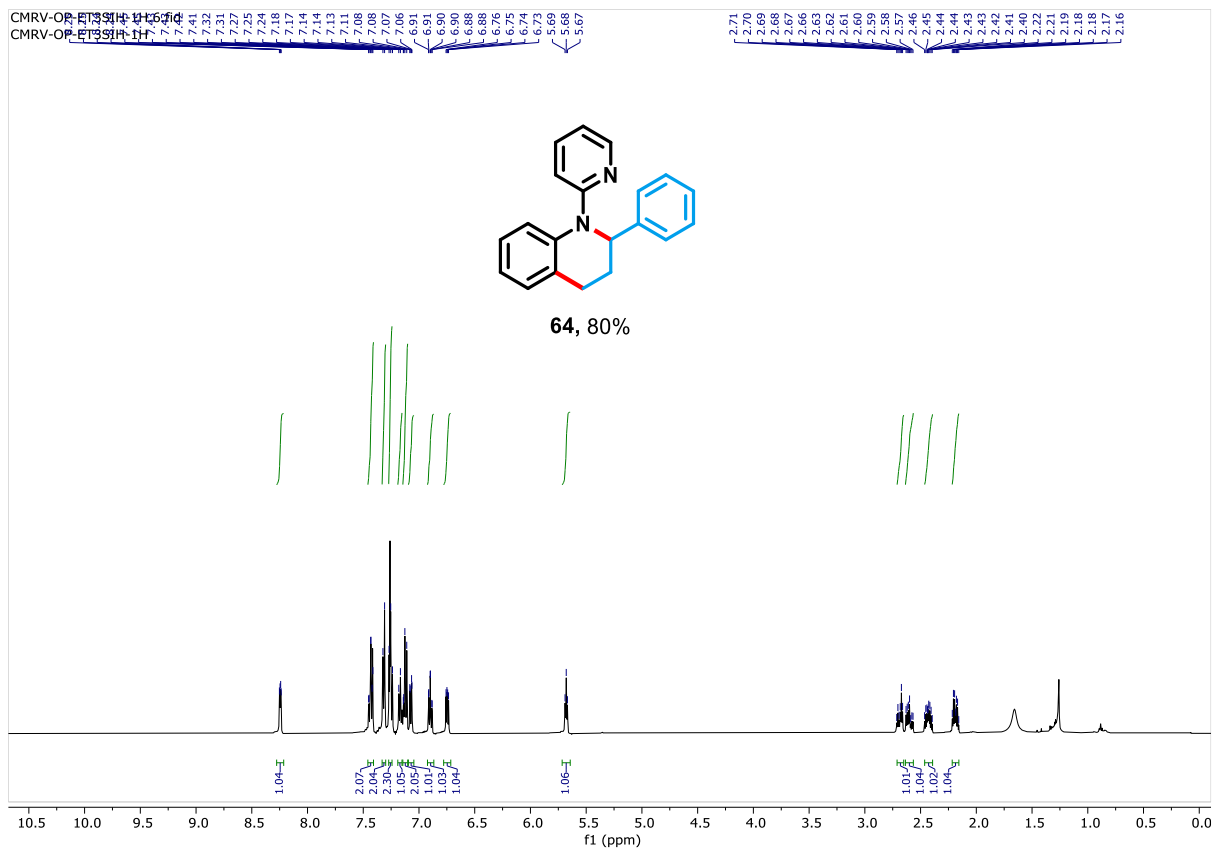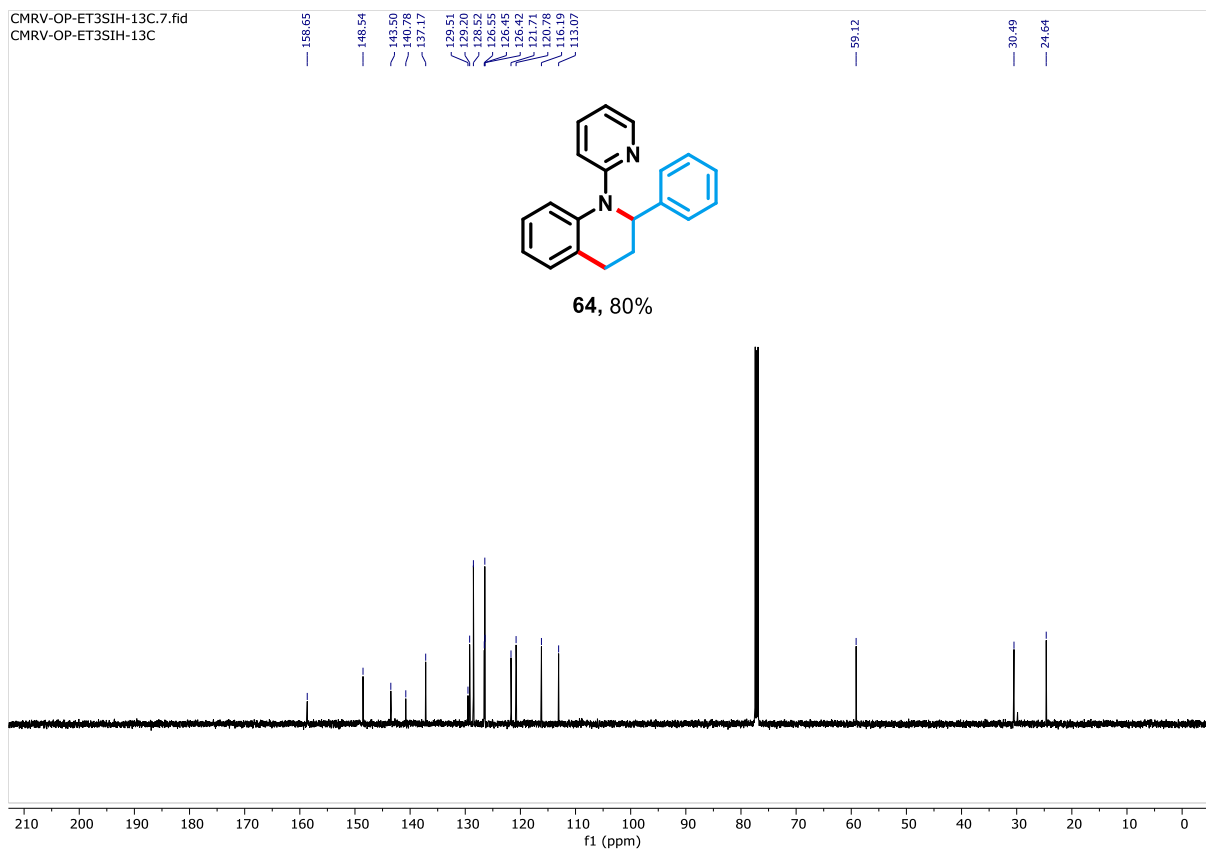

65

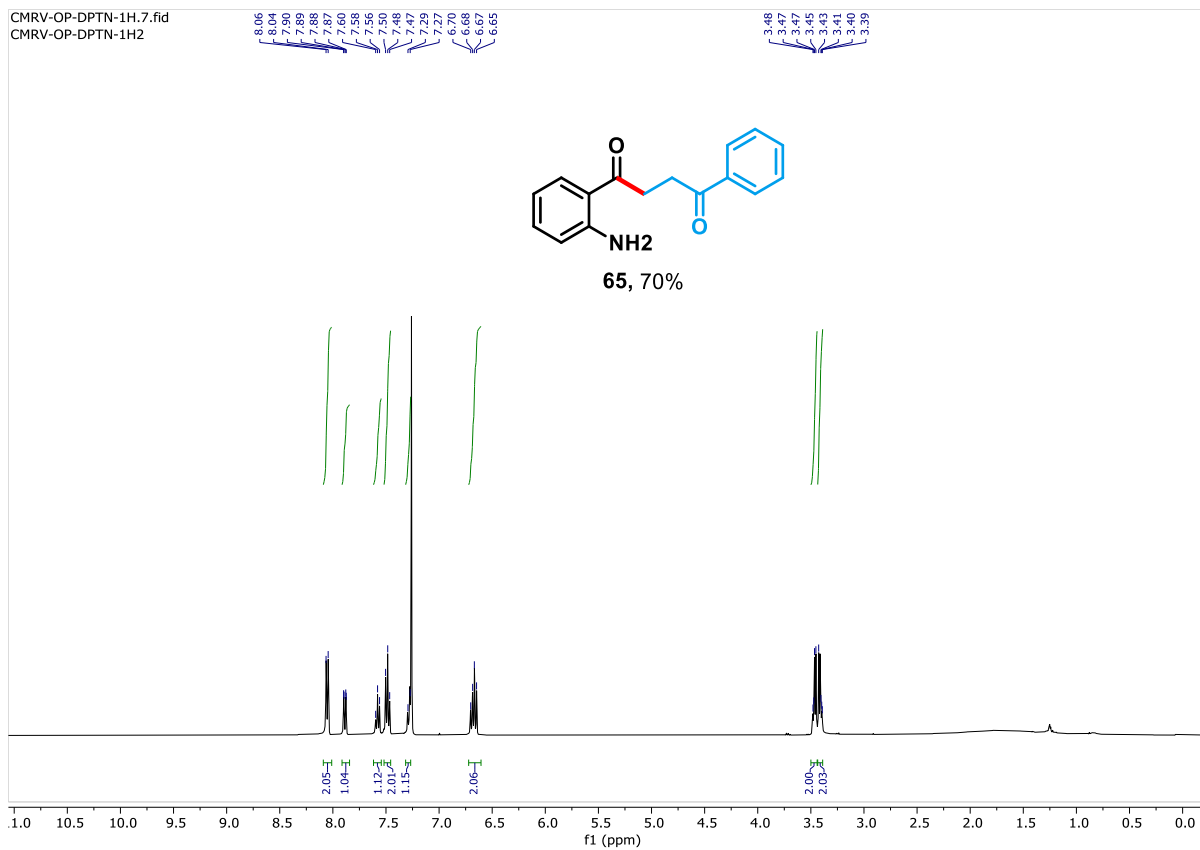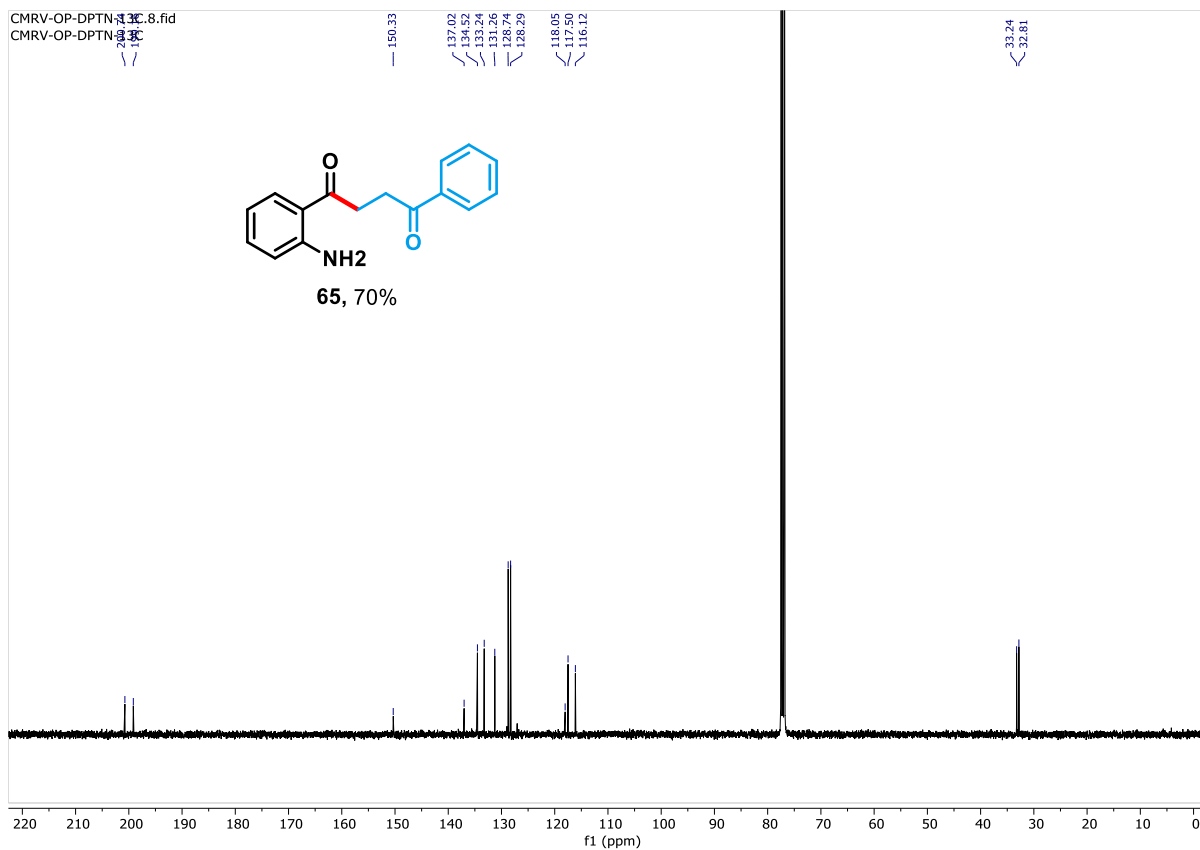

Supplement: d4cc03797a1.pdf [file d4cc03797a1.pdf]
